# Supplementary material for: New insights into the environmental performance of perovskite-on-silicon tandem solar cells – a life cycle assessment of industrially manufactured modules
Source: Royal Society of Chemistry journal article supplement (doi:10.1039/d2se00096b), 2022-01-01
Supplement: d2se00096b1.pdf [file d2se00096b1.pdf]

**Table S1. The amount of lead (Pb) installed in a PST module and assumptions about its emission into the air, fresh water and soil at the end of its service life as part of a worst-case scenario.**

| Input (I)/output (O)              | mass | rel. | DS <sup>1</sup> |
|-----------------------------------|------|------|-----------------|
| Substance                         | [g]  | [%]  |                 |
| I lead iodide (PbI <sub>2</sub> ) | 6.2  | 100% | PD              |
| I lead (Pb)                       | 2.8  | 45%  | CA              |
| I iodide (I)                      | 3.4  | 55%  | CA              |
| O lead (Pb), emitted              | 2.8  | 100% | AS              |
| O to air                          | 0.1  | 5%   | SD[1]           |
| O to fresh water                  | 2.4  | 86%  | SD[1]           |
| O to soil <sup>2</sup>            | 0.3  | 10%  | SD[1]           |

<sup>1</sup> data source: PD - primary data (data obtained from surveys carried out between July 2018 and February 2021 as part of the ProTandem project); CA - calculated; AS - assumption; SD - secondary data: [1] Hauck et al., (2017).<sup>2</sup> It was assumed that emissions into the soil affect industrial and agricultural soils in equal parts.

**Table S2. Comparison of the impact per kWh of the PST and SHJ module with that of the German grid mix (GDM).**

| Impact category                       | CFM <sup>1</sup><br>abbr. | unit<br>per module        | SHJ<br>[amount] | PST<br>[amount] | GDM <sup>2</sup><br>[amount] |
|---------------------------------------|---------------------------|---------------------------|-----------------|-----------------|------------------------------|
| climate change, default               | GWP                       | g CO <sub>2</sub> eq.     | 40.6            | 37.7            | 573.0                        |
| particulate matter form. <sup>3</sup> | PMFP                      | mg PM <sub>2.5</sub> eq.  | 63.6            | 59.5            | 166.0                        |
| fossil depletion                      | FDP                       | g oil eq.                 | 15.5            | 14.3            | 166.0                        |
| freshwater consumption                | FWC                       | L                         | 1.4             | 1.2             | 2.2                          |
| freshwater ecotoxicity                | FETP                      | mg 1,4-DB eq.             | 348.6           | 307.0           | 35.8                         |
| freshwater eutrophication             | FEP                       | mg P eq.                  | 20.6            | 18.3            | 2.4                          |
| human toxicity, non-cancer            | HTP (NC)                  | g 1,4-DB eq.              | 43.5            | 36.6            | 13.4                         |
| ionizing radiation                    | IRP                       | Bq Co-60 eq. <sup>4</sup> | 6.9             | 6.2             | 9.2                          |
| marine ecotoxicity                    | METP                      | g 1,4-DB eq.              | 0.6             | 0.5             | 0.1                          |
| marine eutrophication                 | MEP                       | mg N eq.                  | 2.9             | 2.7             | 17.7                         |
| metal depletion                       | MDP                       | mg Cu eq.                 | 187.7           | 176.5           | 1060.0                       |
| terrestrial acidification             | TAP                       | mg SO <sub>2</sub> eq.    | 149.1           | 137.4           | 532.0                        |
| terrestrial ecotoxicity               | TETP                      | g 1,4-DB eq.              | 57.1            | 52.0            | 187.0                        |

<sup>1</sup> characterisation factor at midpoint; <sup>2</sup> Impact of the German grid mix according to the GaBi DB process "DE: Electricity grid mix ts" with the reference year 2016 (valid until 2022); <sup>3</sup> Fine Particulate Matter Formation; <sup>4</sup> Bq Co-60 eq. to air.

## References

Hauck, M., Ligthart, T., Schaap, M., Boukris, E., Brouwer, D., 2017. Environmental benefits of reduced electricity use exceed impacts from lead use for perovskite based tandem solar cell. *Renew. Energy* 111, 906-913. <https://doi.org/10.1016/j.renene.2017.04.044>
