# Supplementary material for: New insights into the environmental performance of perovskite-on-silicon tandem solar cells – a life cycle assessment of industrially manufactured modules
Source: Royal Society of Chemistry journal article supplement (doi:10.1039/d2se00096b), 2022-01-01
Supplement: d2se00096b2.xlsx [file d2se00096b2.xlsx]

## Sheet: LCI modell_PST_HJT_calculated
	FOREGROUND SYSTEM												BACKGROUND SYSTEM
	unit process							unit	amount		diff.	data source	modelled as
	input (I) / output (O)								SHJ	PST	SHJ/PST		flow	GEO	plan/process/emission	database
	A.01	wafer fabrication (CN)
	I	acetic acid, without water, in 98% solution state						kg	35687.2	35687.2	0	RoW: single-Si wafer production, photovoltaic ecoinvent 3.5 <u-so> (https://v371.ecoquery.ecoinvent.org/Details/UPR/29eaa6eb-e876-4bcf-bbc2-a9b98961fb9b/8b738ea0-f89e-4627-8679-433616064e82)	acetic acid, without water, in 98% solution state	GLO	market for acetic acid, without water, in 98% solution state	ecoinvent 3.5						Electricity grid mix 1kV-60kV
	I	acrylic binder, without water, in 34% solution state						kg	1830.11	1830.11	0	RoW: single-Si wafer production, photovoltaic ecoinvent 3.5 <u-so> (https://v371.ecoquery.ecoinvent.org/Details/UPR/29eaa6eb-e876-4bcf-bbc2-a9b98961fb9b/8b738ea0-f89e-4627-8679-433616064e82)	acrylic binder, without water, in 34% solution state	RER	market for acrylic binder, without water, in 34% solution state	ecoinvent 3.5
	I	alkylbenzene sulfonate, linear, petrochemical						kg	219613	219613	0	RoW: single-Si wafer production, photovoltaic ecoinvent 3.5 <u-so> (https://v371.ecoquery.ecoinvent.org/Details/UPR/29eaa6eb-e876-4bcf-bbc2-a9b98961fb9b/8b738ea0-f89e-4627-8679-433616064e82)	alkylbenzene sulfonate, linear, petrochemical	GLO	market for alkylbenzene sulfonate, linear, petrochemical	ecoinvent 3.5
	I	brass						kg	6817.16	6817.16	0	RoW: single-Si wafer production, photovoltaic ecoinvent 3.5 <u-so> (https://v371.ecoquery.ecoinvent.org/Details/UPR/29eaa6eb-e876-4bcf-bbc2-a9b98961fb9b/8b738ea0-f89e-4627-8679-433616064e82)	brass	CH	market for brass	ecoinvent 3.5
	I	dipropylene glycol monomethyl ether						kg	274517	274517	0	RoW: single-Si wafer production, photovoltaic ecoinvent 3.5 <u-so> (https://v371.ecoquery.ecoinvent.org/Details/UPR/29eaa6eb-e876-4bcf-bbc2-a9b98961fb9b/8b738ea0-f89e-4627-8679-433616064e82)	dipropylene glycol monomethyl ether	RER	market for dipropylene glycol monomethyl ether	ecoinvent 3.5
	I	electricity, medium voltage						MJ	2.63536e+07	2.63536e+07	0	RoW: single-Si wafer production, photovoltaic ecoinvent 3.5 <u-so> (https://v371.ecoquery.ecoinvent.org/Details/UPR/29eaa6eb-e876-4bcf-bbc2-a9b98961fb9b/8b738ea0-f89e-4627-8679-433616064e82)	electricity, medium voltage	CN	Electricity grid mix 1kV-60kV	GaBi SP40
	I	glass wool mat						kg	9150.56	9150.56	0	RoW: single-Si wafer production, photovoltaic ecoinvent 3.5 <u-so> (https://v371.ecoquery.ecoinvent.org/Details/UPR/29eaa6eb-e876-4bcf-bbc2-a9b98961fb9b/8b738ea0-f89e-4627-8679-433616064e82)	glass wool mat	GLO	glass wool mat production, without cullet	ecoinvent 3.5
	I	heat, district or industrial, natural gas						MJ	3.2942e+06	3.2942e+06	0	RoW: single-Si wafer production, photovoltaic ecoinvent 3.5 <u-so> (https://v371.ecoquery.ecoinvent.org/Details/UPR/29eaa6eb-e876-4bcf-bbc2-a9b98961fb9b/8b738ea0-f89e-4627-8679-433616064e82)	heat, district or industrial, natural gas	CN	Thermal energy from natural gas	GaBi SP40
	I	hydrochloric acid, without water, in 30% solution state						kg	2470.65	2470.65	0	RoW: single-Si wafer production, photovoltaic ecoinvent 3.5 <u-so> (https://v371.ecoquery.ecoinvent.org/Details/UPR/29eaa6eb-e876-4bcf-bbc2-a9b98961fb9b/8b738ea0-f89e-4627-8679-433616064e82)	hydrochloric acid, without water, in 30% solution state	RER	hydrochloric acid production, from the reaction of hydrogen with chlorine	ecoinvent 3.5
	I	silicon carbide						kg	2.4066e+06	2.4066e+06	0	RoW: single-Si wafer production, photovoltaic ecoinvent 3.5 <u-so> (https://v371.ecoquery.ecoinvent.org/Details/UPR/29eaa6eb-e876-4bcf-bbc2-a9b98961fb9b/8b738ea0-f89e-4627-8679-433616064e82)	silicon carbide	GLO	market for silicon carbide	ecoinvent 3.5
	I	silicon, single crystal, Czochralski process, photovoltaics						kg	983502	983502	0	RoW: single-Si wafer production, photovoltaic ecoinvent 3.5 <u-so> (https://v371.ecoquery.ecoinvent.org/Details/UPR/29eaa6eb-e876-4bcf-bbc2-a9b98961fb9b/8b738ea0-f89e-4627-8679-433616064e82)	silicon, single crystal, Czochralski process, photovoltaics	RER	market for silicon, single crystal, Czochralski process, photovoltaics	ecoinvent 3.5
	I	sodium hydroxide, without water, in 50% solution state						kg	13725.8	13725.8	0	RoW: single-Si wafer production, photovoltaic ecoinvent 3.5 <u-so> (https://v371.ecoquery.ecoinvent.org/Details/UPR/29eaa6eb-e876-4bcf-bbc2-a9b98961fb9b/8b738ea0-f89e-4627-8679-433616064e82)	sodium hydroxide, without water, in 50% solution state	GLO	market for sodium hydroxide, without water, in 50% solution state	ecoinvent 3.5
	I	steel, low-alloyed, hot rolled						kg	1.35666e+06	1.35666e+06	0	RoW: single-Si wafer production, photovoltaic ecoinvent 3.5 <u-so> (https://v371.ecoquery.ecoinvent.org/Details/UPR/29eaa6eb-e876-4bcf-bbc2-a9b98961fb9b/8b738ea0-f89e-4627-8679-433616064e82)	steel, low-alloyed, hot rolled	GLO	market for steel, low-alloyed, hot rolled	ecoinvent 3.5
	I	tap water						kg	5490.33	5490.33	0	RoW: single-Si wafer production, photovoltaic ecoinvent 3.5 <u-so> (https://v371.ecoquery.ecoinvent.org/Details/UPR/29eaa6eb-e876-4bcf-bbc2-a9b98961fb9b/8b738ea0-f89e-4627-8679-433616064e82)	tap water	EU-28	Tap water from groundwater	GaBi SP40
	I	triethylene glycol						kg	2.4798e+06	2.4798e+06	0	RoW: single-Si wafer production, photovoltaic ecoinvent 3.5 <u-so> (https://v371.ecoquery.ecoinvent.org/Details/UPR/29eaa6eb-e876-4bcf-bbc2-a9b98961fb9b/8b738ea0-f89e-4627-8679-433616064e82)	triethylene glycol	RER	market for triethylene glycol	ecoinvent 3.5
	I	wafer factory						pcs.	3.66022	3.66022	0	RoW: single-Si wafer production, photovoltaic ecoinvent 3.5 <u-so> (https://v371.ecoquery.ecoinvent.org/Details/UPR/29eaa6eb-e876-4bcf-bbc2-a9b98961fb9b/8b738ea0-f89e-4627-8679-433616064e82)	wafer factory	GLO	market for wafer factory	ecoinvent 3.5
	I	waste, from silicon wafer production [waste]						kg	-100656	-100656	0	RoW: single-Si wafer production, photovoltaic ecoinvent 3.5 <u-so> (https://v371.ecoquery.ecoinvent.org/Details/UPR/29eaa6eb-e876-4bcf-bbc2-a9b98961fb9b/8b738ea0-f89e-4627-8679-433616064e82)	waste, from silicon wafer production [Waste]	GLO	market for waste, from silicon wafer production	ecoinvent 3.5
	I	water, completely softened, from decarbonised water, at user [18000: natural water]						kg	5.94786e+07	5.94786e+07	0	RoW: single-Si wafer production, photovoltaic ecoinvent 3.5 <u-so> (https://v371.ecoquery.ecoinvent.org/Details/UPR/29eaa6eb-e876-4bcf-bbc2-a9b98961fb9b/8b738ea0-f89e-4627-8679-433616064e82)	water, completely softened, from decarbonised water, at user [18000: Natural water]	GLO	market for water, completely softened, from decarbonised water, at user	ecoinvent 3.5
	I	wire drawing, steel						kg	1.36343e+06	1.36343e+06	0	RoW: single-Si wafer production, photovoltaic ecoinvent 3.5 <u-so> (https://v371.ecoquery.ecoinvent.org/Details/UPR/29eaa6eb-e876-4bcf-bbc2-a9b98961fb9b/8b738ea0-f89e-4627-8679-433616064e82)	wire drawing, steel	GLO	market for wire drawing, steel	ecoinvent 3.5
	O	adsorbable organic halogen compounds (AOX) [analytical measures to fresh water]						kg	458.708	458.708	0	RoW: single-Si wafer production, photovoltaic ecoinvent 3.5 <u-so> (https://v371.ecoquery.ecoinvent.org/Details/UPR/29eaa6eb-e876-4bcf-bbc2-a9b98961fb9b/8b738ea0-f89e-4627-8679-433616064e82)	Adsorbable organic halogen compounds (AOX) [Analytical measures to fresh water]	CN	emission to fresh water	ecoinvent 3.5
	O	biological oxygen demand (BOD) [analytical measures to fresh water]						kg	27044.5	27044.5	0	RoW: single-Si wafer production, photovoltaic ecoinvent 3.5 <u-so> (https://v371.ecoquery.ecoinvent.org/Details/UPR/29eaa6eb-e876-4bcf-bbc2-a9b98961fb9b/8b738ea0-f89e-4627-8679-433616064e82)	Biological oxygen demand (BOD) [Analytical measures to fresh water]	CN	emission to fresh water	ecoinvent 3.5
	O	cadmium [heavy metals to fresh water]						kg	5.53682	5.53682	0	RoW: single-Si wafer production, photovoltaic ecoinvent 3.5 <u-so> (https://v371.ecoquery.ecoinvent.org/Details/UPR/29eaa6eb-e876-4bcf-bbc2-a9b98961fb9b/8b738ea0-f89e-4627-8679-433616064e82)	Cadmium [Heavy metals to fresh water]	CN	emission to fresh water	ecoinvent 3.5
	O	chemical oxygen demand (COD) [analytical measures to fresh water]						kg	27044.5	27044.5	0	RoW: single-Si wafer production, photovoltaic ecoinvent 3.5 <u-so> (https://v371.ecoquery.ecoinvent.org/Details/UPR/29eaa6eb-e876-4bcf-bbc2-a9b98961fb9b/8b738ea0-f89e-4627-8679-433616064e82)	Chemical oxygen demand (COD) [Analytical measures to fresh water]	CN	emission to fresh water	ecoinvent 3.5
	O	chromium, ion [surface water]						kg	27.6841	27.6841	0	RoW: single-Si wafer production, photovoltaic ecoinvent 3.5 <u-so> (https://v371.ecoquery.ecoinvent.org/Details/UPR/29eaa6eb-e876-4bcf-bbc2-a9b98961fb9b/8b738ea0-f89e-4627-8679-433616064e82)	Chromium, ion [surface water]	CN	emission to surface water	ecoinvent 3.5
	O	copper [heavy metals to fresh water]						kg	55.3682	55.3682	0	RoW: single-Si wafer production, photovoltaic ecoinvent 3.5 <u-so> (https://v371.ecoquery.ecoinvent.org/Details/UPR/29eaa6eb-e876-4bcf-bbc2-a9b98961fb9b/8b738ea0-f89e-4627-8679-433616064e82)	Copper [Heavy metals to fresh water]	CN	emission to fresh water	ecoinvent 3.5
	O	DOC, dissolved organic carbon [analytical measures to fresh water]						kg	10141.6	10141.6	0	RoW: single-Si wafer production, photovoltaic ecoinvent 3.5 <u-so> (https://v371.ecoquery.ecoinvent.org/Details/UPR/29eaa6eb-e876-4bcf-bbc2-a9b98961fb9b/8b738ea0-f89e-4627-8679-433616064e82)	DOC, Dissolved Organic Carbon [Analytical measures to fresh water]	CN	emission to fresh water	ecoinvent 3.5
	O	lead [heavy metals to fresh water]						kg	27.6841	27.6841	0	RoW: single-Si wafer production, photovoltaic ecoinvent 3.5 <u-so> (https://v371.ecoquery.ecoinvent.org/Details/UPR/29eaa6eb-e876-4bcf-bbc2-a9b98961fb9b/8b738ea0-f89e-4627-8679-433616064e82)	Lead [Heavy metals to fresh water]	CN	emission to fresh water	ecoinvent 3.5
	O	mercury [heavy metals to fresh water]						kg	5.53682	5.53682	0	RoW: single-Si wafer production, photovoltaic ecoinvent 3.5 <u-so> (https://v371.ecoquery.ecoinvent.org/Details/UPR/29eaa6eb-e876-4bcf-bbc2-a9b98961fb9b/8b738ea0-f89e-4627-8679-433616064e82)	Mercury [Heavy metals to fresh water]	CN	emission to fresh water	ecoinvent 3.5
	O	nickel, ion [surface water]						kg	55.3682	55.3682	0	RoW: single-Si wafer production, photovoltaic ecoinvent 3.5 <u-so> (https://v371.ecoquery.ecoinvent.org/Details/UPR/29eaa6eb-e876-4bcf-bbc2-a9b98961fb9b/8b738ea0-f89e-4627-8679-433616064e82)	Nickel, ion [surface water]	CN	emission to surface water	ecoinvent 3.5
	O	nitrogen [inorganic emissions to fresh water]						kg	9100.14	9100.14	0	RoW: single-Si wafer production, photovoltaic ecoinvent 3.5 <u-so> (https://v371.ecoquery.ecoinvent.org/Details/UPR/29eaa6eb-e876-4bcf-bbc2-a9b98961fb9b/8b738ea0-f89e-4627-8679-433616064e82)	Nitrogen [Inorganic emissions to fresh water]	CN	emission to fresh water	ecoinvent 3.5
	O	phosphate [inorganic emissions to fresh water]						kg	458.708	458.708	0	RoW: single-Si wafer production, photovoltaic ecoinvent 3.5 <u-so> (https://v371.ecoquery.ecoinvent.org/Details/UPR/29eaa6eb-e876-4bcf-bbc2-a9b98961fb9b/8b738ea0-f89e-4627-8679-433616064e82)	Phosphate [Inorganic emissions to fresh water]	CN	emission to fresh water	ecoinvent 3.5
	O	total organic bound carbon (TOC) [analytical measures to fresh water]						kg	10141.6	10141.6	0	RoW: single-Si wafer production, photovoltaic ecoinvent 3.5 <u-so> (https://v371.ecoquery.ecoinvent.org/Details/UPR/29eaa6eb-e876-4bcf-bbc2-a9b98961fb9b/8b738ea0-f89e-4627-8679-433616064e82)	Total organic bound carbon (TOC) [Analytical measures to fresh water]	CN	emission to fresh water	ecoinvent 3.5
	O	water [inorganic emissions to air]						m3	8922.61	8922.61	0	RoW: single-Si wafer production, photovoltaic ecoinvent 3.5 <u-so> (https://v371.ecoquery.ecoinvent.org/Details/UPR/29eaa6eb-e876-4bcf-bbc2-a9b98961fb9b/8b738ea0-f89e-4627-8679-433616064e82)	Water [Inorganic emissions to air]	CN	emission to air	ecoinvent 3.5
	O	water [other emissions to fresh water]						m3	50561.5	50561.5	0	RoW: single-Si wafer production, photovoltaic ecoinvent 3.5 <u-so> (https://v371.ecoquery.ecoinvent.org/Details/UPR/29eaa6eb-e876-4bcf-bbc2-a9b98961fb9b/8b738ea0-f89e-4627-8679-433616064e82)	Water [Other emissions to fresh water]	CN	emission to fresh water	ecoinvent 3.5
	O	single-Si wafer, photovoltaic [allocatable product]						m2	35467268	35467268	0	RoW: single-Si wafer production, photovoltaic ecoinvent 3.5 <u-so> (https://v371.ecoquery.ecoinvent.org/Details/UPR/29eaa6eb-e876-4bcf-bbc2-a9b98961fb9b/8b738ea0-f89e-4627-8679-433616064e82)	single-Si wafer, photovoltaic [allocatable product]	CN	A.02 - wafer packaging (CN)	modelled item
	A.02	wafer packaging (CN)
	I	single-Si wafer, photovoltaic [allocatable product]						m2	35467268	35467268	0	RoW: single-Si wafer production, photovoltaic ecoinvent 3.5 <u-so> (https://v371.ecoquery.ecoinvent.org/Details/UPR/29eaa6eb-e876-4bcf-bbc2-a9b98961fb9b/8b738ea0-f89e-4627-8679-433616064e82)	single-Si wafer, photovoltaic [allocatable product]	CN	A.01 - wafer fabrication (CN)	modelled item
	I	packaging film, low density polyethylene						kg	91505.6	91505.6	0	RoW: single-Si wafer production, photovoltaic ecoinvent 3.5 <u-so> (https://v371.ecoquery.ecoinvent.org/Details/UPR/29eaa6eb-e876-4bcf-bbc2-a9b98961fb9b/8b738ea0-f89e-4627-8679-433616064e82)	packaging film, low density polyethylene	GLO	market for packaging film, low density polyethylene	ecoinvent 3.5
	I	paper, woodfree, coated						kg	173861	173861	0	RoW: single-Si wafer production, photovoltaic ecoinvent 3.5 <u-so> (https://v371.ecoquery.ecoinvent.org/Details/UPR/29eaa6eb-e876-4bcf-bbc2-a9b98961fb9b/8b738ea0-f89e-4627-8679-433616064e82)	paper, woodfree, coated	RER	paper production, woodfree, coated, at integrated mill	ecoinvent 3.5
	I	polystyrene, high impact						kg	183011	183011	0	RoW: single-Si wafer production, photovoltaic ecoinvent 3.5 <u-so> (https://v371.ecoquery.ecoinvent.org/Details/UPR/29eaa6eb-e876-4bcf-bbc2-a9b98961fb9b/8b738ea0-f89e-4627-8679-433616064e82)	polystyrene, high impact	GLO	market for polystyrene, high impact	ecoinvent 3.5
	O	single-Si wafer [plant gate CN]						m2	35467268	35467268	0	RoW: single-Si wafer production, photovoltaic ecoinvent 3.5 <u-so> (https://v371.ecoquery.ecoinvent.org/Details/UPR/29eaa6eb-e876-4bcf-bbc2-a9b98961fb9b/8b738ea0-f89e-4627-8679-433616064e82)	single-Si wafer [plant gate CN]	CN	A.03 - wafer transport (CN to DE)	modelled item
	A.03	wafer transport (CN to DE)
	I	single-Si wafer [plant gate CN]						pcs	35467268	35467268	0	assumption	single-Si wafer [plant gate CN]	CN	A.02 - wafer packaging (CN)	modelled item
	I	transport road [truck]						kg∙km	1.23005e+08	1.23005e+08	0	based on Borken-Kleefeld and Weidema (2013)	transport, freight, lorry, unspecified [allocatable product]	GLO	market group for transport, freight, lorry, unspecified	ecoinvent 3.5
	I	transport rail [train]						kg∙km	5.89849e+06	5.89849e+06	0	based on Borken-Kleefeld and Weidema (2013)	transport, freight train [allocatable product]	GLO	market group for transport, freight train	ecoinvent 3.5
	I	transport marine [container vessel]						kg∙km	4.28059e+08	4.28059e+08	0	based on Borken-Kleefeld and Weidema (2013)	transport, freight, sea, transoceanic ship [allocatable product]	GLO	transport, freight, sea, transoceanic ship	ecoinvent 3.5
	O	defective parts (wafers)						t	0.442567	0.442567	0	assumption	treatment of waste, from silicon wafer production, underground deposit ecoinvent 3.5	RoW	treatment of waste, from silicon wafer production, underground deposit	ecoinvent 3.5
	O	single-Si wafer [plant gate DE]						pcs	3.54229e+07	3.54229e+07	0	assumption / Borken-Kleefeld and Weidema (2013)	single-Si wafer [plant gate DE]	CN	B.01 - wafer cleaning / texturing (wet chemistry)	modelled item
	B.01	wafer cleaning / texturing (wet chemistry)
	I	single-Si wafer [plant gate DE]						pcs	35467268	35467268	0	primary data	single-Si wafer [plant gate DE]	CN	A.03 - wafer transport (CN to DE)	modelled item
	I	hydrofluoric acid [49% in H2O, VLSI grade]						l	52596	52596	0	primary data	hydrogen fluoride (49% in H2O)	DE	preparation of hydrogen fluoride (49% in H2O)	modelled item
		I	hydrogen fluoride [34231: Chemical elements n.e.c.; inorganic acids except phosphoric, nitric and sulphonitric; inorganic oxygen compoun[…]]					kg	25.772	25.772	0	primary data	hydrogen fluoride [34231: Chemical elements n.e.c.; inorganic acids except phosphoric, nitric and sulphonitric; inorganic oxygen compoun[…]]	RER	market for hydrogen fluoride	ecoinvent 3.5
		I	water, ultrapure [allocatable product]					kg	26824	26824	0	primary data	water, ultrapure [allocatable product]	GLO	market for water, ultrapure	ecoinvent 3.5
	I	hydrogen chloride [36% in H2O, VLSI grade]						l	6136.2	6136.2	0	primary data	hydrogen chloride (36% in H2O)	DE	preparation of hydrogen chloride (36% in H2O)	modelled item
		I	hydrochloric acid (100%) [Inorganic intermediate products]					kg	2.20903	2.20903	0	primary data	hydrochloric acid (100%) [Inorganic intermediate products]	DE	Hydrochloric acid mix (100%)	GaBi SP40
		I	water, ultrapure [allocatable product]					kg	3927.17	3927.17	0	primary data	water, ultrapure [allocatable product]	GLO	market for water, ultrapure	ecoinvent 3.5
	I	potassium hydroxide [50% in H2O, technical grade]						l	122724	175320	0.3	primary data	potassium hydroxide (50% in H2O)	DE	preparation of potassium hydroxide (50% in H2O)	modelled item
			potassium hydroxide [34231: Chemical elements n.e.c.; inorganic acids except phosphoric, nitric and sulphonitric; inorganic oxygen compoun[…]]					kg	61.362	87.66	0.3	primary data	potassium hydroxide [34231: Chemical elements n.e.c.; inorganic acids except phosphoric, nitric and sulphonitric; inorganic oxygen compoun[…]]	GLO	market for potassium hydroxide	ecoinvent 3.5
			water, ultrapure [allocatable product]					kg	61362	87660	0.3	primary data	water, ultrapure [allocatable product]	GLO	market for water, ultrapure	ecoinvent 3.5
	I	additive "CellTex" [unknown polymere]						kg	7012.8	7012.8	0	primary data	CellTex (unknown polymere)	DE	Preparation of CellTex proxy	modelled item
		I	water, ultrapure [allocatable product]					kg	620111	620111	0	based on Gong et al. (2019) [times factor 100 ]	water, ultrapure [allocatable product]	GLO	market for water, ultrapure	ecoinvent 3.5
		I	ethanol, without water, in 99.7% solution state, from ethylene [allocatable product]					m3	93.0166	93.0166	0	based on Gong et al. (2019) [times factor 100 ]	ethanol, without water, in 99.7% solution state, from ethylene [allocatable product]	RER	market for ethanol, without water, in 99.7% solution state, from ethylene	ecoinvent 3.5
		I	sodium hydroxide (100%; caustic soda) [Inorganic intermediate products]					kg	7751.38	7751.38	0	based on Gong et al. (2019) [times factor 100 ]	Sodium hydroxide (100%; caustic soda) [Inorganic intermediate products]	DE	Sodium hydroxide (caustic soda) mix (100%)	GaBi SP40
	I	oxygen [O2, gas]						l	9467280	9467280	0	primary data	Oxygen liquid [Inorganic intermediate products]	DE	Oxygen (liquid)	GaBi SP40
	I	nitrogen [N2, gas]						l	157788000	157788000	0	primary data	Nitrogen liquid [Inorganic intermediate products]	DE	Nitrogen (liquid)	GaBi SP40
	I	electricity [process]						MJ	11045160	11045160	0	primary data	Electricity [Electric power]	DE	Electricity grid mix 1kV-60kV	GaBi SP40
	I	ultra pure water [dionized]						kg	75860964	9.1745e+07	0.173132	primary data	water, ultrapure	DE	X.03 - ultrapure water system	modelled item
	I	clean dry air (CDA)						m³	368172	368172	0	primary data	Compressed air, 14 bar, low efficiency [Mechanical energy]	De	X.06 - air compressor	modelled item
	I	styrofoam boxes [packaging material]						t	3	3	0	primary data	polystyrene foam slab [allocatable product]	GLO	market for polystyrene foam slab	ecoinvent 3.5
	I	PE packaging film [packaging material]						t	5	5	0	primary data	packaging film, low density polyethylene [allocatable product]	GLO	market for packaging film, low density polyethylene	ecoinvent 3.5
	O	styrofoam boxes [waste]						t	3	3	0	primary data	waste polystyrene [Waste]	CH	treatment of waste polystyrene, municipal incineration	ecoinvent 3.5
	O	PE packaging film [waste]						t	5	5	0	primary data	waste plastic, industrial electronics [Waste]	CH	treatment of waste plastic, industrial electronics, municipal incineration	ecoinvent 3.5
	O	defective parts (cells / modules etc.)						t	1	1	0	primary data	defective cells [waste to treatment]	DE	MIXER | defective parts [waste, from wafer production|hazardous waste]	modelled item
		O	waste, from silicon wafer production					t	0.95	0.95	0	primary data	waste, from silicon wafer production [Waste]	DE	treatment of waste, from silicon wafer production, underground deposit	ecoinvent 3.5
		O	hazardous waste (to treatment)					t	0.05	0.05	0	primary data	Hazardous waste (unspec.) [Hazardous waste]	DE	Hazardous waste (statistical average) (no C, worst case scenario incl. landfill)	GaBi SP40
	O	exhaust [acidic]						m³	65745000	65745000	0	primary data	exhaust [acidic, to air washer]	DE	X.09 - process exhaust ventilators	modelled item
	O	exhaust [caustic]						m³	66621600	66621600	0	primary data	exhaust [caustic, to air washer]	DE	X.09 - process exhaust ventilators	modelled item
	O	exhaust [general, wet]						m³	43830000	43830000	0	primary data	exhaust [general (wet), to air]	DE	X.09 - process exhaust ventilators	modelled item
	O	waste water [drain alkaline, rinse]						m³	31294.6	44706.6	0.3	primary data	waste water [to inhouse treatment]	DE	X.04 - inhouse waste water treatment	modelled item
	O	waste water [drain caustic]						m³	1718.14	2454.48	0.3	primary data	waste water [to inhouse treatment]	DE	X.04 - inhouse waste water treatment	modelled item
	O	waste water [drain acid]						m³	613.62	613.62	0	primary data	waste water [to inhouse treatment]	DE	X.04 - inhouse waste water treatment	modelled item
	O	waste water [drain fluoride, rinse]						m³	41200.2	41200.2	0	primary data	waste water [to inhouse treatment]	DE	X.04 - inhouse waste water treatment	modelled item
	O	waste water [drain fluoride, concentrate]						m³	1227.24	1227.24	0	primary data	waste water [to inhouse treatment]	DE	X.04 - inhouse waste water treatment	modelled item
	O	single-Si wafer [cleande, textured]						pcs	3.53671e+07	3.53671e+07	0	primary data	single-Si wafer [cleande, textured]	DE	B.02 - PECVD of thin film layer (a-Si:H)	modelled item
	B.02	PECVD of thin film layer (a-Si:H)
	I	single-Si wafer [cleande, textured]						pcs	3.53671e+07	3.53671e+07	0	primary data	single-Si wafer [cleande, textured]	DE	B.01 - wafer cleaning/ texturing (wet chemistry)	modelled item
	I	tray, cleaned						pcs	3.53671e+07	3.53671e+07	0	primary data	tray, cleaned	DE	X.02 - tray cleaning	modelled item
	I	argon [Ar, gas]						l	296957	296957	0	primary data	Argon [Inorganic intermediate products]	DE	Argon (liquid)	GaBi SP40
	I	nitrogen [N2, gas]						l	1009843200	1009843200	0	primary data	Nitrogen liquid [Inorganic intermediate products]	NL	Nitrogen (liquid)	GaBi SP40
	I	silane [H4Si, gas]						l	552258	552258	0	primary data	Silane (Sm3)	RER	preparation of silane (silicon tetrahydride)	modelled item
		I	Electricity [Electric power]					MJ	49703.2	49703.2	0	based on Jungbluth and Stucki (2012)	Electricity [Electric power]	EU-28	Electricity grid mix 1kV-60kV	GaBi SP40
		I	heat, district or industrial, natural gas [allocatable product]					MJ	98854.2	98854.2	0	based on Jungbluth and Stucki (2012)	heat, district or industrial, natural gas [allocatable product]	RER	market group for heat, district or industrial, natural gas	ecoinvent 3.5
		I	hydrogen, liquid [allocatable product]					kg	46.5001	46.5001	0	based on Jungbluth and Stucki (2012)	hydrogen, liquid [allocatable product]	RER	market for hydrogen, liquid	ecoinvent 3.5
		I	lime, hydrated, packed [allocatable product]					kg	276.129	276.129	0	based on Jungbluth and Stucki (2012)	lime, hydrated, packed [allocatable product]	RER	market for lime, hydrated, packed	ecoinvent 3.5
		I	nitrogen, liquid [allocatable product]					kg	3429.52	3429.52	0	based on Jungbluth and Stucki (2012)	nitrogen, liquid [allocatable product]	RER	market for nitrogen, liquid	ecoinvent 3.5
		I	silicon tetrachloride [allocatable product]					kg	44.9538	44.9538	0	based on Jungbluth and Stucki (2012)	silicon tetrachloride [allocatable product]	DE	market for silicon tetrachloride	ecoinvent 3.5
		I	silicon, solar grade [allocatable product]					kg	552.258	552.258	0	based on Jungbluth and Stucki (2012)	silicon, solar grade [allocatable product]	RER	silicon production, solar grade, modified Siemens process	ecoinvent 3.5
		I	silicone factory [allocatable product]					pcs.	5.68826e-09	5.68826e-09	0	based on Jungbluth and Stucki (2012)	silicone factory [allocatable product]	GLO	market for silicone factory	ecoinvent 3.5
		I	transport, freight train [allocatable product]					tkm	2606.66	2606.66	0	based on Jungbluth and Stucki (2012)	transport, freight train [allocatable product]	RER	market group for transport, freight train	ecoinvent 3.5
		I	transport, freight, lorry, unspecified [allocatable product]					tkm	434.627	434.627	0	based on Jungbluth and Stucki (2012)	transport, freight, lorry, unspecified [allocatable product]	GLO	market group for transport, freight, lorry, unspecified	ecoinvent 3.5
		O	AOX, Adsorbable Organic Halogen as Cl [ecoinvent long-term to fresh water]					kg	0.00596439	0.00596439	0	based on Jungbluth and Stucki (2012)	AOX, Adsorbable Organic Halogen as Cl [ecoinvent long-term to fresh water]	RER	emission to fresh water	ecoinvent 3.5
		O	Biological oxygen demand, BSB5 (Ecoinvent) [ecoinvent long-term to fresh water]					kg	0.0433523	0.0433523	0	based on Jungbluth and Stucki (2012)	Biological oxygen demand, BSB5 (Ecoinvent) [ecoinvent long-term to fresh water]	RER	emission to fresh water	ecoinvent 3.5
		O	Cadmium, ion [ecoinvent long-term to fresh water]					kg	0.000522988	0.000522988	0	based on Jungbluth and Stucki (2012)	Cadmium, ion [ecoinvent long-term to fresh water]	RER	emission to fresh water	ecoinvent 3.5
		O	Chloride [ecoinvent long-term to fresh water]					kg	21.2619	21.2619	0	based on Jungbluth and Stucki (2012)	Chloride [ecoinvent long-term to fresh water]	RER	emission to fresh water	ecoinvent 3.5
		O	Chromium, ion [ecoinvent long-term to fresh water]					kg	0.000434627	0.000434627	0	based on Jungbluth and Stucki (2012)	Chromium, ion [ecoinvent long-term to fresh water]	RER	emission to fresh water	ecoinvent 3.5
		O	COD, Chemical Oxygen Demand [ecoinvent long-term to fresh water]					kg	0.487644	0.487644	0	based on Jungbluth and Stucki (2012)	COD, Chemical Oxygen Demand [ecoinvent long-term to fresh water]	RER	emission to fresh water	ecoinvent 3.5
		O	Copper [ecoinvent long-term to fresh water]					kg	0.000378297	0.000378297	0	based on Jungbluth and Stucki (2012)	Copper [ecoinvent long-term to fresh water]	RER	emission to fresh water	ecoinvent 3.5
		O	DOC, Dissolved Organic Carbon [ecoinvent long-term to fresh water]					kg	0.394864	0.394864	0	based on Jungbluth and Stucki (2012)	DOC, Dissolved Organic Carbon [ecoinvent long-term to fresh water]	RER	emission to fresh water	ecoinvent 3.5
		O	Fluoride [ecoinvent long-term to fresh water]					kg	0.0204888	0.0204888	0	based on Jungbluth and Stucki (2012)	Fluoride [ecoinvent long-term to fresh water]	RER	emission to fresh water	ecoinvent 3.5
		O	Iron [ecoinvent long-term to fresh water]					kg	0.00326937	0.00326937	0	based on Jungbluth and Stucki (2012)	Iron [ecoinvent long-term to fresh water]	RER	emission to fresh water	ecoinvent 3.5
		O	Lead [ecoinvent long-term to fresh water]					kg	0.000112661	0.000112661	0	based on Jungbluth and Stucki (2012)	Lead [ecoinvent long-term to fresh water]	RER	emission to fresh water	ecoinvent 3.5
		O	Mercury [ecoinvent long-term to fresh water]					kg	1.0272e-06	1.0272e-06	0	based on Jungbluth and Stucki (2012)	Mercury [ecoinvent long-term to fresh water]	RER	emission to fresh water	ecoinvent 3.5
		O	Nickel, ion [ecoinvent long-term to fresh water]					kg	0.000440702	0.000440702	0	based on Jungbluth and Stucki (2012)	Nickel, ion [ecoinvent long-term to fresh water]	RER	emission to fresh water	ecoinvent 3.5
		O	Nitrogen [ecoinvent long-term to fresh water]					kg	0.157394	0.157394	0	based on Jungbluth and Stucki (2012)	Nitrogen [ecoinvent long-term to fresh water]	RER	emission to fresh water	ecoinvent 3.5
		O	Phosphate [ecoinvent long-term to fresh water]					kg	0.00237471	0.00237471	0	based on Jungbluth and Stucki (2012)	Phosphate [ecoinvent long-term to fresh water]	RER	emission to fresh water	ecoinvent 3.5
		O	Phosphorus [ecoinvent long-term to fresh water]					kg	0.0002568	0.0002568	0	based on Jungbluth and Stucki (2012)	Phosphorus [ecoinvent long-term to fresh water]	RER	emission to fresh water	ecoinvent 3.5
		O	Sodium [ecoinvent long-term to fresh water]					kg	14.911	14.911	0	based on Jungbluth and Stucki (2012)	Sodium [ecoinvent long-term to fresh water]	RER	emission to fresh water	ecoinvent 3.5
		O	Sulphate [ecoinvent long-term to fresh water]					kg	0.10272	0.10272	0	based on Jungbluth and Stucki (2012)	Sulphate [ecoinvent long-term to fresh water]	RER	emission to fresh water	ecoinvent 3.5
		O	TOC, Total Organic Carbon [ecoinvent long-term to fresh water]					kg	0.394864	0.394864	0	based on Jungbluth and Stucki (2012)	TOC, Total Organic Carbon [ecoinvent long-term to fresh water]	RER	emission to fresh water	ecoinvent 3.5
		O	Waste heat [ecoinvent long-term to air]					MJ	49703.2	49703.2	0	based on Jungbluth and Stucki (2012)	Waste heat [ecoinvent long-term to air]	RER	emission to air	ecoinvent 3.5
		O	Zinc, ion [ecoinvent long-term to fresh water]					kg	0.00101063	0.00101063	0	based on Jungbluth and Stucki (2012)	Zinc, ion [ecoinvent long-term to fresh water]	RER	emission to fresh water	ecoinvent 3.5
	I	nitrogen triflouride [NF3, gas]						l	120971	120971	0	primary data	Nitrogen trifluoride, at plant	RER	preparation of nitrogen trifluoride, at plant	modelled item
		I	ammonia, liquid [allocatable product]					kg	30.6056	30.6056	0	based on Jungbluth and Stucki (2012)	ammonia, liquid [allocatable product]	RER	market for ammonia, liquid	ecoinvent 3.5
		I	chemical factory, organics [allocatable product]					pcs.	4.83883e-08	4.83883e-08	0	based on Jungbluth and Stucki (2012)	chemical factory, organics [allocatable product]	GLO	market for chemical factory, organics	ecoinvent 3.5
		I	Electricity [Electric power]					MJ	18726.3	18726.3	0	based on Jungbluth and Stucki (2012)	Electricity [Electric power]	EU-28	Electricity grid mix 1kV-60kV	GaBi SP40
		I	fluorine, liquid [allocatable product]					kg	204.441	204.441	0	based on Jungbluth and Stucki (2012)	fluorine, liquid [allocatable product]	RER	market for fluorine, liquid	ecoinvent 3.5
		I	heat, district or industrial, natural gas [allocatable product]					MJ	8.46796	8.46796	0	based on Jungbluth and Stucki (2012)	heat, district or industrial, natural gas [allocatable product]	RER	market group for heat, district or industrial, natural gas	ecoinvent 3.5
		I	transport, freight train [allocatable product]					tkm	141.536	141.536	0	based on Jungbluth and Stucki (2012)	transport, freight train [allocatable product]	RER	market group for transport, freight train	ecoinvent 3.5
		I	transport, freight, lorry, unspecified [allocatable product]					tkm	23.5893	23.5893	0	based on Jungbluth and Stucki (2012)	transport, freight, lorry, unspecified [allocatable product]	GLO	market group for transport, freight, lorry, unspecified	ecoinvent 3.5
		I	wastewater from wafer fabrication [Waste]					m3	-1.45165	-1.45165	0	based on Jungbluth and Stucki (2012)	wastewater from wafer fabrication [Waste]	RoW	treatment of wastewater from wafer fabrication, capacity 1.1E10l/year	ecoinvent 3.5
		I	Water, cooling, unspecified natural origin [Water]					m3	2.9033	2.9033	0	based on Jungbluth and Stucki (2012)	Water, cooling, unspecified natural origin [Water]	DE	Tap water from groundwater	GaBi SP40
		I	Water, unspecified natural origin [Water]					m3	1.45165	1.45165	0	based on Jungbluth and Stucki (2012)	Water, unspecified natural origin [Water]	DE	Tap water from groundwater	GaBi SP40
		O	Ammonia [ecoinvent long-term to air]					kg	0.0612112	0.0612112	0	based on Jungbluth and Stucki (2012)	Ammonia [ecoinvent long-term to air]	RER	emission to air	ecoinvent 3.5
		O	Fluorine [ecoinvent long-term to air]					kg	0.410091	0.410091	0	based on Jungbluth and Stucki (2012)	Fluorine [ecoinvent long-term to air]	RER	emission to air	ecoinvent 3.5
		O	Waste heat [ecoinvent long-term to air]					MJ	18750.5	18750.5	0	based on Jungbluth and Stucki (2012)	Waste heat [ecoinvent long-term to air]	RER	emission to air	ecoinvent 3.5
	I	diborane [B2H6 in H2, gas]						l	536479	536479	0	primary data	diborane [allocatable product]	GLO	market for diborane	ecoinvent 3.5
	I	phosphine in [1% PH3 in H2, gas]						l	315576	315576	0	primary data	Phosphine (1% PH3 in H2)	GLO	preparation of phosphine [1% PH3 in H2]	modelled item
		I	Hydrogen (Sm3)					m3	312.42	312.42	0	primary data	hydrogen, liquid [allocatable product]	RER	market for hydrogen, liquid	ecoinvent 3.5
		I	Phosphane (Sm3)					m3	3.15576	3.15576	0	primary data	phosphane [allocatable product]	GLO	market for phosphane	ecoinvent 3.5
	I	hydrogen [H2]						l	5259600	5259600	0	primary data	hydrogen, liquid [allocatable product]	RER	market for hydrogen, liquid	ecoinvent 3.5
	I	electricity [process]						MJ	4102488	4102488	0	primary data	Electricity [Electric power]	DE	Electricity grid mix 1kV-60kV	GaBi SP40
	I	cooling water, conditioned [process cooling]						m³	376938	376938	0	primary data	cooling water, conditioned [process cooling]	DE	X.05 - process cooling (water)	modelled item
	I	electrcity [cooling, PCW]						MJ	3.40822e+06	3.40822e+06	0	primary data	Electricity [Electric power]	DE	Electricity grid mix 1kV-60kV	GaBi SP40
	I	clean dry air (CDA)						m³	568037	568037	0	primary data	Compressed air, 14 bar, low efficiency [Mechanical energy]	De	X.06 - air compressor	modelled item
	O	defective parts (cells / modules etc.)						t	0.5	0.5	0	primary data	defective cells [waste to treatment]	DE	MIXER | defective parts [waste, from wafer production|hazardous waste]	modelled item
		O	waste, from silicon wafer production					t	0.475	0.475	0	primary data	waste, from silicon wafer production [Waste]	DE	treatment of waste, from silicon wafer production, underground deposit	ecoinvent 3.5
		O	hazardous waste (to treatment)					t	0.025	0.025	0	primary data	Hazardous waste (unspec.) [Hazardous waste]	DE	Hazardous waste (statistical average) (no C, worst case scenario incl. landfill)	GaBi SP40
	O	exhaust [general]						m³	20161800	20161800	0	primary data	exhaust [general, to air filter]	DE	X.09 - process exhaust ventilators	modelled item
	O	exhaust [process gas, to abatement]						m³	157788	157788	0	primary data	exhaust [process gas, to abatement]	DE	X.09 - process exhaust ventilators	modelled item
	O	cooling water, used [process cooling]						m³	376938	376938	0	primary data	cooling water, used [process cooling]	DE	X.05 - process cooling (water)	modelled item
	O	cell [wafer with thin film layers added]						pcs	3.5317e+07	3.5317e+07	0	primary data	cell [wafer with thin film layers added]	DE	B.03 - sputter FS: ITO #1 (indium-tin-oxide)	modelled item
	B.03	sputter FS: ITO #1 (indium-tin-oxide)
	I	cell [wafer with thin film layers added]						pcs	3.5317e+07	3.5317e+07	0	primary data	cell [wafer with thin film layers added]	DE	B.02 - PECVD of thin film layer (a-Si:H)	modelled item
	I	ITO Target [97% In2O3 / 3% SnO2]						kg	858.824	85.8824	-9	primary data	indium tin oxide powder, nanoscale, for sputtering target [35499: Other chemical products n.e.c.]	RER	market for indium tin oxide powder, nanoscale, for sputtering target	ecoinvent 3.5
	I	oxygen [O2, gas]						l	2629.8	2629.8	0	primary data	Oxygen liquid [Inorganic intermediate products]	DE	Oxygen (liquid)	GaBi SP40
	I	argon [Ar, gas]						l	105192	105192	0	primary data	Argon [Inorganic intermediate products]	DE	Argon (liquid)	GaBi SP40
	I	nitrogen [N2, gas]						l	31557600	31557600	0	primary data	Nitrogen liquid [Inorganic intermediate products]	DE	Nitrogen (liquid)	GaBi SP40
	I	electricity [process]						MJ	631152	631152	0	primary data	Electricity [Electric power]	DE	Electricity grid mix 1kV-60kV	GaBi SP40
	I	cooling water, conditioned [process cooling]						m³	61362	61362	0	primary data	cooling water, conditioned [process cooling]	DE	X.05 - process cooling (water)	modelled item
	I	electrcity [cooling, PCW]						MJ	757227	757227	0	primary data	Electricity [Electric power]	DE	Electricity grid mix 1kV-60kV	GaBi SP40
	I	clean dry air (CDA)						m³	31557.6	31557.6	0	primary data	Compressed air, 14 bar, low efficiency [Mechanical energy]	De	X.06 - air compressor	modelled item
	O	defective parts (cells / modules etc.)						t	0.5	0.5	0	primary data	defective cells [waste to treatment]	DE	MIXER | defective parts [waste, from wafer production|hazardous waste]	modelled item
		O	waste, from silicon wafer production					t	0.475	0.475	0	primary data	waste, from silicon wafer production [Waste]	DE	treatment of waste, from silicon wafer production, underground deposit	ecoinvent 3.5
		O	hazardous waste (to treatment)					t	0.025	0.025	0	primary data	Hazardous waste (unspec.) [Hazardous waste]	DE	Hazardous waste (statistical average) (no C, worst case scenario incl. landfill)	GaBi SP40
	O	exhaust [general]						m³	1472688	1472688	0	primary data	exhaust [general, to air filter]	DE	X.09 - process exhaust ventilators	modelled item
	O	cooling water, used [process cooling]						m³	15340.5	15340.5	0	primary data	cooling water, used [process cooling]	DE	X.05 - process cooling (water)	modelled item
	O	cell [with 10 nm ITO added FS]						pcs	3.52669e+07	3.52669e+07	0	primary data	cell [with 10 nm ITO added FS]	DE	B.04 - sputter RS: ITO #2 (indium-tin-oxide)	modelled item
	B.04	sputter RS: ITO #2 (indium-tin-oxide)
	I	cell [with 10 nm ITO added FS]						pcs	3.52669e+07	3.52669e+07	0	primary data	cell [with 10 nm ITO added FS]	DE	B.03 - sputter FS: ITO #1 (indium-tin-oxide)	modelled item
	I	ITO Target [97% In2O3 / 3% SnO2]						kg	858.824	858.824	0	primary data	indium tin oxide powder, nanoscale, for sputtering target [35499: Other chemical products n.e.c.]	RER	market for indium tin oxide powder, nanoscale, for sputtering target	ecoinvent 3.5
	I	oxygen [O2, gas]						l	26298	26298	0	primary data	Oxygen liquid [Inorganic intermediate products]	DE	Oxygen (liquid)	GaBi SP40
	I	argon [Ar, gas]						l	1051920	1051920	0	primary data	Argon [Inorganic intermediate products]	DE	Argon (liquid)	GaBi SP40
	I	nitrogen [N2, gas]						l	315576000	315576000	0	primary data	Nitrogen liquid [Inorganic intermediate products]	DE	Nitrogen (liquid)	GaBi SP40
	I	electricity [process]						MJ	6311520	6311520	0	primary data	Electricity [Electric power]	DE	Electricity grid mix 1kV-60kV	GaBi SP40
	I	cooling water, conditioned [process cooling]						m³	613620	613620	0	primary data	cooling water, conditioned [process cooling]	DE	X.05 - process cooling (water)	modelled item
	I	electrcity [cooling, PCW]						MJ	7.57227e+06	7.57227e+06	0	primary data	Electricity [Electric power]	DE	Electricity grid mix 1kV-60kV	GaBi SP40
	I	clean dry air (CDA)						m³	315576	315576	0	primary data	Compressed air, 14 bar, low efficiency [Mechanical energy]	De	X.06 - air compressor	modelled item
	O	defective parts (cells / modules etc.)						t	0.5	0.5	0	primary data	defective cells [waste to treatment]	DE	MIXER | defective parts [waste, from wafer production|hazardous waste]	modelled item
		O	waste, from silicon wafer production					t	0.475	0.475	0	primary data	waste, from silicon wafer production [Waste]	DE	treatment of waste, from silicon wafer production, underground deposit	ecoinvent 3.5
		O	hazardous waste (to treatment)					t	0.025	0.025	0	primary data	Hazardous waste (unspec.) [Hazardous waste]	DE	Hazardous waste (statistical average) (no C, worst case scenario incl. landfill)	GaBi SP40
	O	exhaust [general]						m³	14726880	14726880	0	primary data	exhaust [general, to air filter]	DE	X.09 - process exhaust ventilators	modelled item
	O	cooling water, used [process cooling]						m³	153405	153405	0	primary data	cooling water, used [process cooling]	DE	X.05 - process cooling (water)	modelled item
	O	cell [with 100 nm ITO added RS]						pcs	3.52168e+07	3.52168e+07	0	primary data	cell [with 100 nm ITO added RS]	DE	B.05 - Spiro-OMeTAD deposition (PTAA proxy)	modelled item
	B.05	Spiro-OMeTAD deposition (PTAA proxy)
	I	cell [with 100 nm ITO added RS]						pcs	-	3.52168e+07	1	primary data	cell [with 100 nm ITO added RS]	DE	B.04 - sputter RS: ITO #2 (indium-tin-oxide)	modelled item
	I	Spiro-OMeTAD (PTAA proxy)						kg	-	17085	1	based on Frischknecht et al. (2015)	Spiro-MeOTAD	DE	preparation of Spiro-OMeTAD	modelled item
		I	2,2`, 7,7`-Tetrabromo-9-9`-spirobi [9H-fluorene]					kg	-	11087.1	1	based on Frischknecht et al. (2015)	2,2`, 7,7`-Tetrabromo-9-9`-spirobi [9H-fluorene]	GLO	preparation of 2,2`, 7,7`-Tetrabromo-9-9`-spirobi [9H-fluorene]	modelled item
			I	4-Bromobiphenyl				kg	-	66.4317	1	based on Frischknecht et al. (2015)	4-Bromobiphenyl	GLO	preparation of 4-Bromobiphenyl	modelled item
				I	acetic acid, without water, in 98% solution state [allocatable product]			kg	-	54.6176	1	based on Frischknecht et al. (2015)	acetic acid, without water, in 98% solution state [allocatable product]	GLO	market for acetic acid, without water, in 98% solution state	ecoinvent 3.5
				I	biphenyl			kg	-	8.92421	1	based on Frischknecht et al. (2015)	biphenyl	GLO	preparation of biphenyl	modelled item
					I	benzene [allocatable product]		kg	-	9.04235	1	based on Frischknecht et al. (2015)	benzene [allocatable product]	GLO	market for benzene	ecoinvent 3.5
					I	oxygen, liquid [allocatable product]		kg	-	0.926954	1	based on Frischknecht et al. (2015)	oxygen, liquid [allocatable product]	RER	market for oxygen, liquid	ecoinvent 3.5
					O	Water [Operating materials]		kg	-	1.0451	1	based on Frischknecht et al. (2015)	wastewater, unpolluted [Waste]	RoW	market for wastewater, unpolluted	ecoinvent 3.5
				I	bromine [allocatable product]			kg	-	20.3566	1	based on Frischknecht et al. (2015)	bromine [allocatable product]	GLO	market for bromine	ecoinvent 3.5
				I	trifluoroacetic acid [allocatable product]			kg	-	8.60614	1	based on Frischknecht et al. (2015)	trifluoroacetic acid [allocatable product]	RER	market for trifluoroacetic acid	ecoinvent 3.5
			I	9-Fluorenone				kg	-	657.956	1	based on Frischknecht et al. (2015)	9-Fluorenone	GLO	preparation of 9-Fluorenone	modelled item
				I	Electricity [Electric power]			MJ	-	11.5815	1	based on Frischknecht et al. (2015)	Electricity [Electric power]	EU-28	Electricity grid mix 1kV-60kV	GaBi SP40
				I	polycarboxylates, 40% active substance [allocatable product]			kg	-	857.887	1	based on Frischknecht et al. (2015)	polycarboxylates, 40% active substance [allocatable product]	RER	market for polycarboxylates, 40% active substance	ecoinvent 3.5
				I	sulfuric acid [allocatable product]			kg	-	31.6255	1	based on Frischknecht et al. (2015)	sulfuric acid [allocatable product]	RER	market for sulfuric acid	ecoinvent 3.5
			I	acetic acid, without water, in 98% solution state [allocatable product]				kg	-	474.383	1	based on Frischknecht et al. (2015)	acetic acid, without water, in 98% solution state [allocatable product]	GLO	market for acetic acid, without water, in 98% solution state	ecoinvent 3.5
			I	ammonia, liquid [allocatable product]				kg	-	575.257	1	based on Frischknecht et al. (2015)	ammonia, liquid [allocatable product]	RER	market for ammonia, liquid	ecoinvent 3.5
			I	bromine [allocatable product]				kg	-	239.009	1	based on Frischknecht et al. (2015)	bromine [allocatable product]	GLO	market for bromine	ecoinvent 3.5
			I	dichloromethane [allocatable product]				kg	-	146.313	1	based on Frischknecht et al. (2015)	dichloromethane [allocatable product]	RER	market for dichloromethane	ecoinvent 3.5
			I	diethyl ether, without water, in 99.95% solution state [34170: Ethers, alcohol peroxides, ether peroxides, epoxides, acetals and hemiacetals, and their halogenated, sulphona[…]]				kg	-	10269.2	1	based on Frischknecht et al. (2015)	diethyl ether, without water, in 99.95% solution state [34170: Ethers, alcohol peroxides, ether peroxides, epoxides, acetals and hemiacetals, and their halogenated, sulphona[…]]	RER	market for diethyl ether, without water, in 99.95% solution state	ecoinvent 3.5
			I	Electricity [Electric power]				MJ	-	70012.3	1	based on Frischknecht et al. (2015)	Electricity [Electric power]	EU-28	Electricity grid mix 1kV-60kV	GaBi SP40
			I	hydrochloric acid, without water, in 30% solution state [allocatable product]				kg	-	0.261728	1	based on Frischknecht et al. (2015)	hydrochloric acid, without water, in 30% solution state [allocatable product]	RER	market for hydrochloric acid, without water, in 30% solution state	ecoinvent 3.5
			I	iron (III) chloride, without water, in 40% solution state [allocatable product]				kg	-	2.87174	1	based on Frischknecht et al. (2015)	iron (III) chloride, without water, in 40% solution state [allocatable product]	GLO	market for iron (III) chloride, without water, in 40% solution state	ecoinvent 3.5
			I	magnesium [41601: Tungsten, molybdenum, tantalum, magnesium, cobalt, cadmium, titanium, zirconium, beryllium, gallium, hafnium, […]]				kg	-	89787.3	1	based on Frischknecht et al. (2015)	magnesium [41601: Tungsten, molybdenum, tantalum, magnesium, cobalt, cadmium, titanium, zirconium, beryllium, gallium, hafnium, […]]	GLO	market for magnesium	ecoinvent 3.5
			I	water, ultrapure [allocatable product]				kg	-	36532.9	1	based on Frischknecht et al. (2015)	water, ultrapure [allocatable product]	GLO	market for water, ultrapure	ecoinvent 3.5
		I	3,4'-dimethoxydiphenylamine					kg	-	17993.8	1	based on Frischknecht et al. (2015)	3,4'-dimethoxydiphenylamine	GLO	preparation of 3,4'-dimethoxydiphenylamine	modelled item
			I	4-bromoaniline				kg	-	29898.8	1	based on Frischknecht et al. (2015)	4-bromoaniline	GLO	preparation of 4-bromoaniline	modelled item
				I	aniline [34150: Amine-function compounds; oxygen-function amino-compounds, except lysine and its esters and salts thereof and […]]			kg	-	16176.3	1	based on Frischknecht et al. (2015)	aniline [34150: Amine-function compounds; oxygen-function amino-compounds, except lysine and its esters and salts thereof and […]]	RER	market for aniline	ecoinvent 3.5
				I	bromine [allocatable product]			kg	-	13722.6	1	based on Frischknecht et al. (2015)	bromine [allocatable product]	GLO	market for bromine	ecoinvent 3.5
			I	acetone, liquid [allocatable product]				kg	-	133590	1	based on Frischknecht et al. (2015)	acetone, liquid [allocatable product]	RER	market for acetone, liquid	ecoinvent 3.5
			I	aniline [34150: Amine-function compounds; oxygen-function amino-compounds, except lysine and its esters and salts thereof and […]]				kg	-	17902.9	1	based on Frischknecht et al. (2015)	aniline [34150: Amine-function compounds; oxygen-function amino-compounds, except lysine and its esters and salts thereof and […]]	RER	market for aniline	ecoinvent 3.5
			I	dibenzylideneacetone (C17H14O)				kg	-	61.3426	1	based on Frischknecht et al. (2015)	dibenzylideneacetone (C17H14O)	GLO	preparation dibenzylideneacetone (C17H14O)	modelled item
				I	acetone, liquid [allocatable product]			kg	-	10.6327	1	based on Frischknecht et al. (2015)	acetone, liquid [allocatable product]	RER	market for acetone, liquid	ecoinvent 3.5
				I	benzaldehyde [allocatable product]			kg	-	38.8957	1	based on Frischknecht et al. (2015)	benzaldehyde [allocatable product]	RER	market for benzaldehyde	ecoinvent 3.5
				I	Electricity [Electric power]			MJ	-	0.880061	1	based on Frischknecht et al. (2015)	Electricity [Electric power]	EU-28	Electricity grid mix 1kV-60kV	GaBi SP40
				I	ethanol, without water, in 99.7% solution state, from ethylene [allocatable product]			kg	-	463.477	1	based on Frischknecht et al. (2015)	ethanol, without water, in 99.7% solution state, from ethylene [allocatable product]	RER	market for ethanol, without water, in 99.7% solution state, from ethylene	ecoinvent 3.5
				I	ethyl acetate [allocatable product]			kg	-	29.3536	1	based on Frischknecht et al. (2015)	ethyl acetate [allocatable product]	GLO	market for ethyl acetate	ecoinvent 3.5
				I	sodium hydroxide, without water, in 50% solution state [allocatable product]			kg	-	73.4293	1	based on Frischknecht et al. (2015)	sodium hydroxide, without water, in 50% solution state [allocatable product]	GLO	market for sodium hydroxide, without water, in 50% solution state	ecoinvent 3.5
				I	solvent, organic [allocatable product]			kg	-	0.137226	1	based on Frischknecht et al. (2015)	solvent, organic [allocatable product]	GLO	market for solvent, organic	ecoinvent 3.5
				I	water, ultrapure [allocatable product]			kg	-	1962.96	1	based on Frischknecht et al. (2015)	water, ultrapure [allocatable product]	GLO	market for water, ultrapure	ecoinvent 3.5
			I	diethyl ether, without water, in 99.95% solution state [34170: Ethers, alcohol peroxides, ether peroxides, epoxides, acetals and hemiacetals, and their halogenated, sulphona[…]]				kg	-	1617.63	1	based on Frischknecht et al. (2015)	diethyl ether, without water, in 99.95% solution state [34170: Ethers, alcohol peroxides, ether peroxides, epoxides, acetals and hemiacetals, and their halogenated, sulphona[…]]	GLO	diethyl ether production	ecoinvent 3.5
			I	Electricity [Electric power]				MJ	-	349047	1	based on Frischknecht et al. (2015)	Electricity [Electric power]	EU-28	Electricity grid mix 1kV-60kV	GaBi SP40
			I	ethyl acetate [allocatable product]				kg	-	16176.3	1	based on Frischknecht et al. (2015)	ethyl acetate [allocatable product]	GLO	market for ethyl acetate	ecoinvent 3.5
			I	magnesium sulfate [allocatable product]				kg	-	28808.3	1	based on Frischknecht et al. (2015)	magnesium sulfate [allocatable product]	GLO	market for magnesium sulfate	ecoinvent 3.5
			I	methanol [allocatable product]				kg	-	1581.28	1	based on Frischknecht et al. (2015)	methanol [allocatable product]	GLO	market for methanol	ecoinvent 3.5
			I	nitrogen, liquid [allocatable product]				kg	-	168124	1	based on Frischknecht et al. (2015)	nitrogen, liquid [allocatable product]	RER	market for nitrogen, liquid	ecoinvent 3.5
			I	Palladium chloride (PdCl2)				kg	-	13.9952	1	based on Frischknecht et al. (2015)	Palladium chloride (PdCl2)	GLO	preparation of palladium chloride (PdCl2)	modelled item
				I	Aqua regia			kg	-	5.11642	1	based on Frischknecht et al. (2015)	Aqua regia	GLO	preparation of Aqua regia	modelled item
					I	hydrochloric acid, without water, in 30% solution state [allocatable product]		kg	-	3.83505	1	based on Frischknecht et al. (2015)	hydrochloric acid, without water, in 30% solution state [allocatable product]	RER	market for hydrochloric acid, without water, in 30% solution state	ecoinvent 3.5
					I	nitric acid, without water, in 50% solution state [allocatable product]		kg	-	1.28138	1	based on Frischknecht et al. (2015)	nitric acid, without water, in 50% solution state [allocatable product]	RER	market for nitric acid, without water, in 50% solution state	ecoinvent 3.5
				I	Electricity [Electric power]			MJ	-	70.0123	1	based on Frischknecht et al. (2015)	Electricity [Electric power]	EU-28	Electricity grid mix 1kV-60kV	GaBi SP40
				I	Palladium [Heavy metals to sea water]			kg	-	8.88786	1	based on Frischknecht et al. (2015)	Palladium [Heavy metals to sea water]	GLO	market for palladium	ecoinvent 3.5
			I	Sodium acetate				kg	-	51.9821	1	based on Frischknecht et al. (2015)	Sodium acetate	GLO	preparation of sodium acetate	modelled item
				I	acetic acid, without water, in 98% solution state [allocatable product]			kg	-	38.0778	1	based on Frischknecht et al. (2015)	acetic acid, without water, in 98% solution state [allocatable product]	GLO	market for acetic acid, without water, in 98% solution state	ecoinvent 3.5
				I	sodium hydroxide, without water, in 50% solution state [allocatable product]			kg	-	25.3549	1	based on Frischknecht et al. (2015)	sodium hydroxide, without water, in 50% solution state [allocatable product]	GLO	market for sodium hydroxide, without water, in 50% solution state	ecoinvent 3.5
				I	tap water [allocatable product]			kg	-	11.4506	1	based on Frischknecht et al. (2015)	tap water [allocatable product]	GLO	market group for tap water	ecoinvent 3.5
			I	Sodium tert-butoxide				kg	-	20992.8	1	based on Frischknecht et al. (2015)	Sodium tert-butoxide	GLO	preparation of sodium tert-butoxide	modelled item
				I	1-butanol [allocatable product]			kg	-	16176.3	1	based on Frischknecht et al. (2015)	1-butanol [allocatable product]	GLO	market for 1-butanol	ecoinvent 3.5
				I	sodium [allocatable product]			kg	-	4780.18	1	based on Frischknecht et al. (2015)	sodium [allocatable product]	GLO	market for sodium	ecoinvent 3.5
			I	spent solvent mixture [Waste]				kg	-	-1.59945e+06	1	based on Frischknecht et al. (2015)	spent solvent mixture [Waste]	EU-CH	market for spent solvent mixture	ecoinvent 3.5
			I	tap water [allocatable product]				kg	-	133590	1	based on Frischknecht et al. (2015)	tap water [allocatable product]	GLO	market group for tap water	ecoinvent 3.5
			I	toluene, liquid [allocatable product]				kg	-	18993.5	1	based on Frischknecht et al. (2015)	toluene, liquid [allocatable product]	RER	market for toluene, liquid	ecoinvent 3.5
			I	trichloromethane [allocatable product]				kg	-	2381	1	based on Frischknecht et al. (2015)	trichloromethane [allocatable product]	RER	market for trichloromethane	ecoinvent 3.5
			I	Tris(dibenzylideneacetone)dipalladium(0)				kg	-	13359	1	based on Frischknecht et al. (2015)	chemical, organic [allocatable product]	GLO	market for chemical, organic	ecoinvent 3.5
			I	tri-tert-butylphosphine				kg	-	474.383	1	based on Frischknecht et al. (2015)	tri-tert-butylphosphine	GLO	preparation of tri-tert-butylphosphine	modelled item
				I	ammonia, liquid [allocatable product]			kg	-	-127.229	1	based on Frischknecht et al. (2015)	ammonia, liquid [allocatable product]	GLO	market for tert-butyl amine	ecoinvent 3.5
				I	phosphane [allocatable product]			kg	-	192.661	1	based on Frischknecht et al. (2015)	phosphane [allocatable product]	GLO	market for phosphane	ecoinvent 3.5
				I	tert-butyl amine [allocatable product]			kg	-	413.494	1	based on Frischknecht et al. (2015)	tert-butyl amine [allocatable product]	RoW	market for ammonia, liquid	ecoinvent 3.5
				O	Hydrogen [ecoinvent long-term to air]			kg	-	4.72565	1	based on Frischknecht et al. (2015)	Hydrogen [ecoinvent long-term to air]	GLO	emission to air	ecoinvent 3.5
			I	wastewater, average [Waste]				m3	-	-189.935	1	based on Frischknecht et al. (2015)	wastewater, average [Waste]	EU-CH	treatment of wastewater, average, capacity 1E9l/year	ecoinvent 3.5
			I	water, deionised, from tap water, at user [allocatable product]				kg	-	359876	1	based on Frischknecht et al. (2015)	water, deionised, from tap water, at user [allocatable product]	EU-CH	water production, deionised, from tap water, at user	ecoinvent 3.5
			O	acetone, liquid (output)				kg	-	4743.83	1	based on Frischknecht et al. (2015)	acetone, liquid [allocatable product]	RER	market for acetone, liquid	ecoinvent 3.5
		I	Electricity [Electric power]					MJ	-	85388.9	1	based on Frischknecht et al. (2015)	Electricity [Electric power]	EU-28	Electricity grid mix 1kV-60kV	GaBi SP40
		I	ethyl acetate [allocatable product]					kg	-	15358.4	1	based on Frischknecht et al. (2015)	ethyl acetate [allocatable product]	GLO	market for ethyl acetate	ecoinvent 3.5
		I	magnesium sulfate [allocatable product]					kg	-	27354.2	1	based on Frischknecht et al. (2015)	magnesium sulfate [allocatable product]	GLO	market for magnesium sulfate	ecoinvent 3.5
		I	nitrogen, liquid [allocatable product]					kg	-	159945	1	based on Frischknecht et al. (2015)	nitrogen, liquid [allocatable product]	RER	market for nitrogen, liquid	ecoinvent 3.5
		I	Sodium tert-butoxide					kg	-	10087.4	1	based on Frischknecht et al. (2015)	Sodium tert-butoxide	GLO	preparation of sodium tert-butoxide	modelled item
			I	1-butanol [allocatable product]				kg	-	7773.01	1	based on Frischknecht et al. (2015)	1-butanol [allocatable product]	GLO	market for 1-butanol	ecoinvent 3.5
			I	sodium [allocatable product]				kg	-	2296.97	1	based on Frischknecht et al. (2015)	sodium [allocatable product]	GLO	market for sodium	ecoinvent 3.5
		I	toluene, liquid [allocatable product]					kg	-	19084.4	1	based on Frischknecht et al. (2015)	toluene, liquid [allocatable product]	RER	market for toluene, liquid	ecoinvent 3.5
		I	Tris(dibenzylideneacetone)dipalladium(0)					kg	-	13449.9	1	based on Frischknecht et al. (2015)	chemical, organic [allocatable product]	GLO	market for chemical, organic	ecoinvent 3.5
		I	tri-tert-butylphosphine					kg	-	477.109	1	based on Frischknecht et al. (2015)	tri-tert-butylphosphine	GLO	preparation of tri-tert-butylphosphine	modelled item
			I	ammonia, liquid [allocatable product]				kg	-	-127.96	1	based on Frischknecht et al. (2015)	ammonia, liquid [allocatable product]	GLO	market for tert-butyl amine	ecoinvent 3.5
			I	phosphane [allocatable product]				kg	-	193.768	1	based on Frischknecht et al. (2015)	phosphane [allocatable product]	GLO	market for phosphane	ecoinvent 3.5
			I	tert-butyl amine [allocatable product]				kg	-	415.871	1	based on Frischknecht et al. (2015)	tert-butyl amine [allocatable product]	RoW	market for ammonia, liquid	ecoinvent 3.5
			O	Hydrogen [ecoinvent long-term to air]				kg	-	4.75281	1	based on Frischknecht et al. (2015)	Hydrogen [ecoinvent long-term to air]	GLO	emission to air	ecoinvent 3.5
		I	water, deionised, from tap water, at user [allocatable product]					kg	-	341701	1	based on Frischknecht et al. (2015)	water, deionised, from tap water, at user [allocatable product]	EU-CH	water production, deionised, from tap water, at user	ecoinvent 3.5
	I	nitrogen [N2, gas]						l	-	4.10906e+06	1	primary data	Nitrogen liquid [Inorganic intermediate products]	DE	Nitrogen (liquid)	GaBi SP40
	I	electricity [process]						MJ	-	147926	1	primary data	Electricity [Electric power]	DE	Electricity grid mix 1kV-60kV	GaBi SP40
	I	cooling water, conditioned [process cooling]						m³	-	5752.69	1	primary data	cooling water, conditioned [process cooling]	DE	X.05 - process cooling (water)	modelled item
	I	electrcity [cooling, PCW]						MJ	-	48161.5	1	primary data	Electricity [Electric power]	DE	Electricity grid mix 1kV-60kV	GaBi SP40
	I	clean dry air (CDA)						m³	-	36817.2	1	primary data	Compressed air, 14 bar, low efficiency [Mechanical energy]	De	X.06 - air compressor	modelled item
	O	defective parts (cells / modules etc.)						t	-	0.5	1	primary data	defective cells [waste to treatment]	DE	MIXER | defective parts [waste, from wafer production|hazardous waste]	modelled item
		O	waste, from silicon wafer production					t	-	0.475	1	primary data	waste, from silicon wafer production [Waste]	DE	treatment of waste, from silicon wafer production, underground deposit	ecoinvent 3.5
		O	hazardous waste (to treatment)					t	-	0.025	1	primary data	Hazardous waste (unspec.) [Hazardous waste]	DE	Hazardous waste (statistical average) (no C, worst case scenario incl. landfill)	GaBi SP40
	O	exhaust [general]						m³	-	14025600	1	primary data	exhaust [general, to air filter]	DE	X.09 - process exhaust ventilators	modelled item
	O	cooling water, used [process cooling]						m³	-	1438.17	1	primary data	cooling water, used [process cooling]	DE	X.05 - process cooling (water)	modelled item
	O	cell [with PTAA added FS]						pcs	-	3.51667e+07	1	primary data	cell [with PTAA added FS]	DE	B.06 - perovskite deposition (evaporation)	modelled item
	B.06	perovskite deposition (evaporation)
	I	cell [with PTAA added FS]						pcs	-	3.51667e+07	1	primary data	cell [with PTAA added FS]	DE	B.05 - Spiro-OMeTAD deposition (PTAA proxy)	modelled item
	I	methylamonium iodide [CH3NH3I]						kg	-	1038.72	1	primary data	methylamonium iodide powder (CH3NH3I)	DE	preparation of methylamonium iodide (CH3NH3I)	modelled item
		I	hydriodic acid (HI, 57% in water)					m3	-	0.861529	1	based on Zhang et al., (2015)	hydriodic acid (HI, 57% in water)	DE	preparation of hydriodic acid (57% in H2O)	modelled item
			I	electricity [process]				MJ	-	2455.36	1	based on Zhang et al., (2015)	Electricity [Electric power]	DE	Electricity grid mix 1kV-60kV	GaBi SP40
			I	hydrogen, liquid [allocatable product]				kg	-	4.17325	1	based on Zhang et al., (2015)	hydrogen, liquid [allocatable product]	RER	market for hydrogen, liquid	ecoinvent 3.5
			I	Cooling water [Waste for recovery]				m3	-	344612	1	based on Zhang et al., (2015)	Cooling water [Waste for recovery]	DE	Cooling water [Waste for recovery]	ecoinvent 3.5
			I	iodine [allocatable product]				kg	-	525.844	1	based on Zhang et al., (2015)	iodine [allocatable product]	GLO	market for iodine	ecoinvent 3.5
			I	Nitrogen gaseous [Inorganic intermediate products]				kg	-	198.152	1	based on Zhang et al., (2015)	Nitrogen gaseous [Inorganic intermediate products]	DE	Nitrogen (gaseous)	GaBi SP40
			I	steam, in chemical industry [allocatable product]				kg	-	3833.8	1	based on Zhang et al., (2015)	steam, in chemical industry [allocatable product]	RER	steam production, in chemical industry	ecoinvent 3.5
			I	Water (desalinated; deionised) [Operating materials]				kg	-	402.671	1	based on Zhang et al., (2015)	Water (desalinated; deionised) [Operating materials]	DE	Water (desalinated; deionised)	GaBi SP40
			O	Waste (unspecified) [Consumer waste]				kg	-	71.1589	1	based on Zhang et al., (2015)	Waste (unspecified) [Consumer waste]	DE	Waste (unspecified) [Consumer waste]	ecoinvent 3.5
		I	Methanol [Organic intermediate products]					kg	-	48.1344	1	based on Zhang et al., (2015)	Methanol [Organic intermediate products]	GLO	market for methanol	ecoinvent 3.5
		I	methylamine [allocatable product]					kg	-	202.551	1	based on Zhang et al., (2015)	methylamine [allocatable product]	RER	market for methylamine	ecoinvent 3.5
		O	Waste (unspecified) [Consumer waste]					kg	-	972.245	1	based on Zhang et al., (2015)	Waste (unspecified) [Consumer waste]	DE	Waste (unspecified) [Consumer waste]	ecoinvent 3.5
	I	lead iodide [PbI2]						kg	-	3012.28	1	primary data	lead iodide [PbI2]	DE	preparation of lead iodide	modelled item
		I	electricity [process]					MJ	-	8584.99	1	based on Zhang et al., (2015)	Electricity [Electric power]	DE	Electricity grid mix 1kV-60kV	GaBi SP40
		I	industrial city water [process, tap water]					m3	-	1.20491e+06	1	based on Zhang et al., (2015)	Cooling water [Waste for recovery]	DE	Cooling water [Waste for recovery]	ecoinvent 3.5
		I	lead nitrate					kg	-	2352.27	1	based on Zhang et al., (2015)	lead nitrate	DE	preperation of lead nitrate	modelled item
			I	electricity [process]				MJ	-	6703.97	1	based on Zhang et al., (2015)	Electricity [Electric power]	DE	Electricity grid mix 1kV-60kV	GaBi SP40
			I	industrial city water [cooling, tap water]				m3	-	940.908	1	based on Zhang et al., (2015)	Cooling water [Waste for recovery]	DE	Cooling water [Waste for recovery]	ecoinvent 3.5
			I	Lead [Metals]				kg	-	1599.55	1	based on Zhang et al., (2015)	Lead [Metals]	GLO	market for lead	ecoinvent 3.5
			I	nitric acid, without water, in 50% solution state [allocatable product]				kg	-	1621.43	1	based on Zhang et al., (2015)	nitric acid, without water, in 50% solution state [allocatable product]	RER	nitric acid production, product in 50% solution state	ecoinvent 3.5
			I	Nitrogen gaseous [Inorganic intermediate products]				kg	-	541.022	1	based on Zhang et al., (2015)	Nitrogen gaseous [Inorganic intermediate products]	DE	Nitrogen (gaseous)	GaBi SP40
			I	steam, in chemical industry [allocatable product]				kg	-	10467.6	1	based on Zhang et al., (2015)	steam, in chemical industry [allocatable product]	RER	steam production, in chemical industry	ecoinvent 3.5
			O	Waste (unspecified) [Consumer waste]				kg	-	868.709	1	based on Zhang et al., (2015)	Waste (unspecified) [Consumer waste]	DE	Waste (unspecified) [Consumer waste]	ecoinvent 3.5
		I	Nitrogen gaseous [Inorganic intermediate products]					kg	-	692.824	1	based on Zhang et al., (2015)	Nitrogen gaseous [Inorganic intermediate products]	DE	Nitrogen (gaseous)	GaBi SP40
		I	potassium iodide					kg	-	2357.99	1	based on Zhang et al., (2015)	potassium iodide	DE	preparation of potassium iodide	modelled item
			I	electricity [process]				MJ	-	6720.28	1	based on Zhang et al., (2015)	Electricity [Electric power]	DE	Electricity grid mix 1kV-60kV	GaBi SP40
			I	industrial city water [cooling, tap water]				m3	-	943.197	1	based on Zhang et al., (2015)	Cooling water [Waste for recovery]	DE	Cooling water [Waste for recovery]	ecoinvent 3.5
			I	iodine [allocatable product]				kg	-	2351.16	1	based on Zhang et al., (2015)	iodine [allocatable product]	GLO	market for iodine	ecoinvent 3.5
			I	Nitrogen gaseous [Inorganic intermediate products]				kg	-	542.338	1	based on Zhang et al., (2015)	Nitrogen gaseous [Inorganic intermediate products]	DE	Nitrogen (gaseous)	GaBi SP40
			I	potassium hydroxide [34231: Chemical elements n.e.c.; inorganic acids except phosphoric, nitric and sulphonitric; inorganic oxygen compoun[…]]				kg	-	1039.5	1	based on Zhang et al., (2015)	potassium hydroxide [34231: Chemical elements n.e.c.; inorganic acids except phosphoric, nitric and sulphonitric; inorganic oxygen compoun[…]]	GLO	market for potassium hydroxide	ecoinvent 3.5
			I	steam, in chemical industry [allocatable product]				kg	-	10493.1	1	based on Zhang et al., (2015)	steam, in chemical industry [allocatable product]	RER	steam production, in chemical industry	ecoinvent 3.5
			O	Waste (unspecified) [Consumer waste]				kg	-	1032.67	1	based on Zhang et al., (2015)	Waste (unspecified) [Consumer waste]	DE	Waste (unspecified) [Consumer waste]	ecoinvent 3.5
		I	steam, in chemical industry [allocatable product]					kg	-	13404.6	1	based on Zhang et al., (2015)	steam, in chemical industry [allocatable product]	RER	steam production, in chemical industry	ecoinvent 3.5
		O	Waste (deposited) [Stockpile goods]					kg	-	1697.98	1	based on Zhang et al., (2015)	Waste (unspecified) [Consumer waste]	DE	Waste (unspecified) [Consumer waste]	ecoinvent 3.5
	I	nitrogen [N2, gas]						l	-	2.58871e+08	1	primary data	Nitrogen gaseous [Inorganic intermediate products]	DE	Nitrogen (gaseous)	GaBi SP40
	I	electricity [process]						MJ	-	7.76613e+06	1	primary data	Electricity [Electric power]	DE	Electricity grid mix 1kV-60kV	GaBi SP40
	I	cooling water, conditioned [process cooling]						m³	-	362419	1	primary data	cooling water, conditioned [process cooling]	DE	X.05 - process cooling (water)	modelled item
	I	electrcity [cooling, PCW]						MJ	-	7.58544e+06	1	primary data	Electricity [Electric power]	DE	Electricity grid mix 1kV-60kV	GaBi SP40
	I	clean dry air (CDA)						m³	-	105192	1	primary data	Compressed air, 14 bar, low efficiency [Mechanical energy]	De	X.06 - air compressor	modelled item
	O	defective parts (cells / modules etc.)						t	-	0.5	1	primary data	defective cells [waste to treatment]	DE	MIXER | defective parts [waste, from wafer production|hazardous waste]	modelled item
		O	waste, from silicon wafer production					t	-	0.475	1	primary data	waste, from silicon wafer production [Waste]	DE	treatment of waste, from silicon wafer production, underground deposit	ecoinvent 3.5
		O	hazardous waste (to treatment)					t	-	0.025	1	primary data	Hazardous waste (unspec.) [Hazardous waste]	DE	Hazardous waste (statistical average) (no C, worst case scenario incl. landfill)	GaBi SP40
	O	exhaust [general]						m³	-	1.65943e+07	1	primary data	exhaust [general, to air filter]	DE	X.09 - process exhaust ventilators	modelled item
	O	exhaust [toxic / carcinogenic dust]						m³	-	438300	1	primary data	exhaust [general, to air filter]	DE	X.09 - process exhaust ventilators	modelled item
	O	cooling water, used [process cooling]						m³	-	90604.8	1	primary data	cooling water, used [process cooling]	DE	X.05 - process cooling (water)	modelled item
	O	cell [with MAPbl3 added FS]						pcs	-	3.51167e+07	1	primary data	cell [with MAPbl3 added FS]	DE	B.08 - sputter FS: ZnO (zinc-oxide)	modelled item
	B.07	curing (perovskite layer)
	I	cell [with MAPbl3 added FS]						pcs	-	3.51167e+07	1	primary data	cell [with MAPbl3 added FS]	DE	B.06 - perovskite deposition (evaporation)	modelled item
	I	electricity [process]						MJ	-	1262304	1	primary data	Electricity [Electric power]	DE	Electricity grid mix 1kV-60kV	GaBi SP40
	I	cooling water, conditioned [process cooling]						m³	-	52596	1	primary data	cooling water, conditioned [process cooling]	DE	X.05 - process cooling (water)	modelled item
	I	electrcity [cooling, PCW]						MJ	-	946717	1	primary data	Electricity [Electric power]	DE	Electricity grid mix 1kV-60kV	GaBi SP40
	I	clean dry air (CDA)						m³	-	210384	1	primary data	Compressed air, 14 bar, low efficiency [Mechanical energy]	De	X.06 - air compressor	modelled item
	O	defective parts (cells / modules etc.)						t	-	0.5	1	primary data	defective cells [waste to treatment]	DE	MIXER | defective parts [waste, from wafer production|hazardous waste]	modelled item
		O	waste, from silicon wafer production					t	-	0.475	1	primary data	waste, from silicon wafer production [Waste]	DE	treatment of waste, from silicon wafer production, underground deposit	ecoinvent 3.5
		O	hazardous waste (to treatment)					t	-	0.025	1	primary data	Hazardous waste (unspec.) [Hazardous waste]	DE	Hazardous waste (statistical average) (no C, worst case scenario incl. landfill)	GaBi SP40
	O	exhaust [general]						m³	-	87660	1	primary data	exhaust [general, to air filter]	DE	X.10 - exhaust filter system	modelled item
	O	cooling water, used [process cooling]						m³	-	13149	1	primary data	cooling water, used [process cooling]	DE	X.05 - process cooling (water)	modelled item
	O	perovskite tandem cell [cured]						pcs	-	3.50666e+07	1	primary data	perovskite tandem cell [cured]	DE	B.08 - deposit FS: ZnO (zinc-oxide)	modelled item
	B.08	deposit FS: ZnO (zinc-oxide)
	I	perovskite tandem cell [cured]						pcs	-	3.50666e+07	1	primary data	perovskite tandem cell [cured]	DE	B.07 - curing (perovskite layer)	modelled item
	I	zinc oxide [ZnO]						kg	-	70	1	primary data	zinc oxide [allocatable product]	GLO	market for zinc oxide	ecoinvent 3.5
	I	oxygen [O2, gas]						l	-	525.96	1	primary data	Oxygen liquid [Inorganic intermediate products]	DE	Oxygen (liquid)	GaBi SP40
	I	argon [Ar, gas]						l	-	52596	1	primary data	Argon [Inorganic intermediate products]	DE	Argon (liquid)	GaBi SP40
	I	nitrogen [N2, gas]						l	-	13149000	1	primary data	Nitrogen liquid [Inorganic intermediate products]	DE	Nitrogen (liquid)	GaBi SP40
	I	electricity [process]						MJ	-	315576	1	primary data	Electricity [Electric power]	DE	Electricity grid mix 1kV-60kV	GaBi SP40
	I	cooling water, conditioned [process cooling]						m³	-	30681	1	primary data	cooling water, conditioned [process cooling]	DE	X.05 - process cooling (water)	modelled item
	I	electrcity [cooling, PCW]						MJ	-	315576	1	primary data	Electricity [Electric power]	DE	Electricity grid mix 1kV-60kV	GaBi SP40
	I	clean dry air (CDA)						m³	-	15778.8	1	primary data	Compressed air, 14 bar, low efficiency [Mechanical energy]	De	X.06 - air compressor	modelled item
	O	defective parts (cells / modules etc.)						t	-	0.5	1	primary data	defective cells [waste to treatment]	DE	MIXER | defective parts [waste, from wafer production|hazardous waste]	modelled item
		O	waste, from silicon wafer production					t	-	0.475	1	primary data	waste, from silicon wafer production [Waste]	DE	treatment of waste, from silicon wafer production, underground deposit	ecoinvent 3.5
		O	hazardous waste (to treatment)					t	-	0.025	1	primary data	Hazardous waste (unspec.) [Hazardous waste]	DE	Hazardous waste (statistical average) (no C, worst case scenario incl. landfill)	GaBi SP40
	O	exhaust [general]						m³	-	438300	1	primary data	exhaust [general, to air filter]	DE	X.09 - process exhaust ventilators	modelled item
	O	cooling water, used [process cooling]						m³	-	7670.25	1	primary data	cooling water, used [process cooling]	DE	X.05 - process cooling (water)	modelled item
	O	perovskite tandem cell [ZnO layer added FS]						pcs	-	3.50165e+07	1	primary data	perovskite tandem cell [ZnO layer added FS]	DE	B.09 - sputter FS: ITO #3 (indium-tin-oxide)	modelled item
	B.09	sputter FS: ITO #3 (indium-tin-oxide)
	I	perovskite tandem cell [ZnO layer added FS]						pcs	-	3.50165e+07	1	primary data	perovskite tandem cell [ZnO layer added FS]	DE	B.08 - deposit FS: ZnO (zinc-oxide)	modelled item
	I	ITO Target [97% In2O3 / 3% SnO2]						kg	-	515.294	1	primary data	indium tin oxide powder, nanoscale, for sputtering target [35499: Other chemical products n.e.c.]	RER	market for indium tin oxide powder, nanoscale, for sputtering target	ecoinvent 3.5
	I	oxygen [O2, gas]						l	-	7889.4	1	primary data	Oxygen liquid [Inorganic intermediate products]	DE	Oxygen (liquid)	GaBi SP40
	I	argon [Ar, gas]						l	-	368172	1	primary data	Argon [Inorganic intermediate products]	DE	Argon (liquid)	GaBi SP40
	I	nitrogen [N2, gas]						l	-	115711200	1	primary data	Nitrogen liquid [Inorganic intermediate products]	DE	Nitrogen (liquid)	GaBi SP40
	I	electricity [process]						MJ	-	1893456	1	primary data	Electricity [Electric power]	DE	Electricity grid mix 1kV-60kV	GaBi SP40
	I	cooling water, conditioned [process cooling]						m³	-	219150	1	primary data	cooling water, conditioned [process cooling]	DE	X.05 - process cooling (water)	modelled item
	I	electrcity [cooling, PCW]						MJ	-	2524608	1	primary data	Electricity [Electric power]	DE	Electricity grid mix 1kV-60kV	GaBi SP40
	I	clean dry air (CDA)						m³	-	105192	1	primary data	Compressed air, 14 bar, low efficiency [Mechanical energy]	De	X.06 - air compressor	modelled item
	O	defective parts (cells / modules etc.)						t	-	0.5	1	primary data	defective cells [waste to treatment]	DE	MIXER | defective parts [waste, from wafer production|hazardous waste]	modelled item
		O	waste, from silicon wafer production					t	-	0.475	1	primary data	waste, from silicon wafer production [Waste]	DE	treatment of waste, from silicon wafer production, underground deposit	ecoinvent 3.5
		O	hazardous waste (to treatment)					t	-	0.025	1	primary data	Hazardous waste (unspec.) [Hazardous waste]	DE	Hazardous waste (statistical average) (no C, worst case scenario incl. landfill)	GaBi SP40
	O	exhaust [general]						m³	-	2629800	1	primary data	exhaust [general, to air filter]	DE	X.09 - process exhaust ventilators	modelled item
	O	cooling water, used [process cooling]						m³	-	54787.5	1	primary data	cooling water, used [process cooling]	DE	X.05 - process cooling (water)	modelled item
	O	perovskite tandem cell [ITO layer added FS]						pcs	-	3.49664e+07	1	primary data	perovskite tandem cell [ITO layer added FS]	DE	B.10 - contact formation / metallization (Ag fingers)	modelled item
	B.10	contact formation / metallization (Ag fingers)
	I	cell [ITO layer added FS]						pcs	3.52168e+07	3.49664e+07	-0.00716223	primary data	cell [ITO layer added FS]	DE	B.09 - sputter FS: ITO #3 (indium-tin-oxide)	modelled item
	I	Ag-paste [95% Ag, 5% unknown solvent]						kg	4000	4001	0	primary data	Ag-paste	RER	Ag-paste production (95% Ag, 5% unknown solvent)	modelled item
		I	chemical, organic [allocatable product]					kg	100	100.025	0	primary data	chemical, organic [allocatable product]	GLO	market for chemical, organic	ecoinvent 3.5
		I	silver [allocatable product]					kg	3800	3800.95	0	primary data	silver [allocatable product]	GLO	market for silver	ecoinvent 3.5
		I	electricity, medium voltage [allocatable product]					MJ	3600	3600.9	0	primary data	electricity, medium voltage [allocatable product]	EU-28	Electricity grid mix 1kV-60kV	GaBi SP40
		I	heat, district or industrial, natural gas [17300: Steam and hot water]					MJ	2980.8	2981.55	0	primary data	heat, district or industrial, natural gas [17300: Steam and hot water]	RER	market group for heat, district or industrial, natural gas	ecoinvent 3.5
		I	solder factory [allocatable product]					pcs.	8e-07	8.002e-07	0	primary data	solder factory [allocatable product]	GLO	market for solder factory	ecoinvent 3.5
		I	tin [41443: Tin, unwrought]					kg	100	100.025	0	primary data	tin [41443: Tin, unwrought]	GLO	market for tin	ecoinvent 3.5
		I	transport, freight train [allocatable product]					tkm	175.2	175.244	0	primary data	transport, freight train [allocatable product]	RER	market group for transport, freight train	ecoinvent 3.5
		I	transport, freight, inland waterways, barge [allocatable product]					tkm	87.6	87.6219	0	primary data	transport, freight, inland waterways, barge [allocatable product]	RER	market for transport, freight, inland waterways, barge	ecoinvent 3.5
		I	transport, freight, lorry, unspecified [allocatable product]					tkm	685.2	685.371	0	primary data	transport, freight, lorry, unspecified [allocatable product]	RER	market for transport, freight, lorry, unspecified	ecoinvent 3.5
	I	screens [Stainless-steel meash plus emulsion]						pcs	3500	3500	0	primary data	screens [Stainless-steel meash plus emulsion]	DE	manufacturing of printing screens (application of ag-fingers)	modelled item
		I	adhesive, for metal [allocatable product]					kg	3500	3500	0	primary data	Frame, aluminium, powder coated [Metal parts]	RER	Aluminium frame profile, powder coated (EN15804 A1-A3)	ecoinvent 3.5
		I	aluminium frame [printing screen]					kg	24500	24500	0	primary data	adhesive, for metal [allocatable product]	RER	market for adhesive, for metal	ecoinvent 3.5
		I	printing screen, new [stainless steel mesh]					kg	70000	70000	0	primary data	steel, chromium steel 18/8, hot rolled [allocatable product]	RER	steel production, chromium steel 18/8, hot rolled	ecoinvent 3.5
		O	aluminium frame [printing screen]					pcs.	3500	3500	0	primary data	aluminium frame [printing screen]	DE	B.10 - contact formation / metallization (Ag fingers)	modelled item
		O	printing screen, ready for use [stainless steel mesh + adhesive]					pcs.	3500	3500	0	primary data	printing screen, ready for use [stainless steel mesh + adhesive]	DE	B.10 - contact formation / metallization (Ag fingers)	modelled item
	I	electricity [process]						MJ	3786912	3786912	0	primary data	Electricity [Electric power]	DE	Electricity grid mix 1kV-60kV	GaBi SP40
	I	clean dry air (CDA)						m³	983545	983545	0	primary data	Compressed air, 14 bar, low efficiency [Mechanical energy]	De	X.06 - air compressor	modelled item
	O	defective parts (cells / modules etc.)						t	0.500875	0.5	0	primary data	defective cells [waste to treatment]	DE	MIXER | defective parts [waste, from wafer production|hazardous waste]	modelled item
		O	waste, from silicon wafer production					t	0.475831	0.475	0	primary data	waste, from silicon wafer production [Waste]	DE	treatment of waste, from silicon wafer production, underground deposit	ecoinvent 3.5
		O	hazardous waste (to treatment)					t	0.0250437	0.025	0	primary data	Hazardous waste (unspec.) [Hazardous waste]	DE	Hazardous waste (statistical average) (no C, worst case scenario incl. landfill)	GaBi SP40
	O	Ag-paste [waste to recycling]						kg	201.435	200	-0.0071725	primary data	anode slime, silver and tellurium containing stockpiling [allocatable product]	GLO	market for anode slime, silver and tellurium containing stockpiling	ecoinvent 3.5
	O	aluminium frame [printing screen, for reuse]						pcs.	3348.85	3325	-0.0071725	primary data	aluminium frame [printing screen, for reuse]	DE	B.10 - contact formation / metallization (Ag fingers)	modelled item
	O	aluminium frame + adhesive, abraded [printing screen]						kg	1401.65	1391.67	-0.0071725	primary data	waste aluminium [Waste]	GLO	market for waste aluminium	ecoinvent 3.5
	O	printing screen, abraded [stainless steel to recycling]						pcs.	3525.1	3500	-0.0071725	primary data	scrap steel [Waste]	EU-CH	market for scrap steel	ecoinvent 3.5
	O	exhaust [Volatile Organic Compounds (VOC)						m³	28489500	28489500	0	primary data	exhaust [Volatile Organic Compounds (VOC)	DE	X.09 - process exhaust ventilators	GaBi SP40
	O	cell [Ag fingers added]						pcs	3.51667e+07	3.49163e+07	-0.0071725	primary data	cell [Ag fingers added]	DE	B.11 - curing (cell)	modelled item
	B.11	curing (cell)
	I	cell [Ag fingers added]						pcs	3.51667e+07	3.49163e+07	-0.0071725	primary data	cell [Ag fingers added]	DE	B.10 - contact formation / metallization (Ag fingers)	modelled item
	I	electricity [process]						MJ	946728	946728	0	primary data	Electricity [Electric power]	DE	Electricity grid mix 1kV-60kV	GaBi SP40
	I	clean dry air (CDA)						m³	1.19393e+06	1.19393e+06	0	primary data	Compressed air, 14 bar, low efficiency [Mechanical energy]	De	X.06 - air compressor	modelled item
	O	defective parts (cells / modules etc.)						t	0.2	0.5	0.6	primary data	defective cells [waste to treatment]	DE	MIXER | defective parts [waste, from wafer production|hazardous waste]	modelled item
		O	waste, from silicon wafer production					t	0.19	0.475	0.6	primary data	waste, from silicon wafer production [Waste]	DE	treatment of waste, from silicon wafer production, underground deposit	ecoinvent 3.5
		O	hazardous waste (to treatment)					t	0.01	0.025	0.6	primary data	Hazardous waste (unspec.) [Hazardous waste]	DE	Hazardous waste (statistical average) (no C, worst case scenario incl. landfill)	GaBi SP40
	O	exhaust [general]						m³	43830000	43830000	0	primary data	exhaust [general, to air filter]	DE	X.09 - process exhaust ventilators	modelled item
	O	exhaust [volatile organic compounds (VOC)]						m³	5697900	5697900	0	primary data	exhaust [Volatile Organic Compounds (VOC)	DE	X.09 - process exhaust ventilators	GaBi SP40
	O	tray, used						pcs	3.51467e+07	3.48662e+07	-0.00804474	primary data	tray, used	DE	X.02 - tray cleaning	modelled item
	O	cell [post curing]						pcs	3.51467e+07	3.48662e+07	-0.00804474	primary data	cell [post curing]	DE	B.12 - test	modelled item
	B.12	test
	I	cell [post curing]						pcs	3.51467e+07	3.48662e+07	-0.00804474	primary data	cell [post curing]	DE	B.11 - curing (cell)	modelled item
	I	electricity [process]						MJ	1.08874e+06	1.08874e+06	0	primary data	Electricity [Electric power]	DE	Electricity grid mix 1kV-60kV	GaBi SP40
	I	clean dry air (CDA)						m³	16567.7	16567.7	0	primary data	Compressed air, 14 bar, low efficiency [Mechanical energy]	De	X.06 - air compressor	modelled item
	O	defective parts (cells / modules etc.)						t	0.5	0.5	0	primary data	defective cells [waste to treatment]	DE	MIXER | defective parts [waste, from wafer production|hazardous waste]	modelled item
		O	waste, from silicon wafer production					t	0.475	0.475	0	primary data	waste, from silicon wafer production [Waste]	DE	treatment of waste, from silicon wafer production, underground deposit	ecoinvent 3.5
		O	hazardous waste (to treatment)					t	0.025	0.025	0	primary data	Hazardous waste (unspec.) [Hazardous waste]	DE	Hazardous waste (statistical average) (no C, worst case scenario incl. landfill)	GaBi SP40
	O	cell [tested]						pcs	3.50966e+07	3.48161e+07	-0.00805632	primary data	cell [tested]	DE	C.02 - module packaging	modelled item
	C.01	module assembly
	I	cell [tested]						pcs	3.48161e+07	3.48161e+07	0	primary data	cell [tested]	DE	B.12 - test	modelled item
	I	aluminium frame						kg	1.64403e+06	1.64403e+06	0	primary data	Frame, aluminium, powder coated [Metal parts]	DE	Aluminium frame profile, powder coated (EN15804 A1-A3)	GaBi SP40
	I	Copper-Wires [Cu]						kg	75098.8	75098.8	0	primary data	Copper wire [Metals]	DE	Copper wire; technology mix; market mix, at plant; cross section 1 mm	GaBi SP40
	I	Cell_fixation_tape [PET]						kg	9666	9666	0	primary data	cell fixation tape (generic tape)	DE	cell fixation tape (generic tape)	modelled item
		I	Elastomer joint strips [Plastics]					kg	4833	4833	0	primary data	Elastomer joint strips [Plastics]	DE	Elastomer joint tape, polyurethane (EN15804 A1-A3)	GaBi SP40
		I	Joint gasket tape [Plastic parts]					kg	4833	4833	0	primary data	Joint gasket tape [Plastic parts]	DE	Joint sealing tape fabric tape (EN15804 A1-A3)	GaBi SP40
	I	float glass						kg	11000000	11000000	0	primary data	solar glass, low-iron [allocatable product]	GLO	market for solar glass, low-iron	ecoinvent 3.5
	I	Interconnection ribbon [Cu]						kg	37800	37800	0	primary data	interconnection ribbon (copper wires)	DE	interconnection ribbon (copper wires)	modelled item
		I	Copper (99.999%; electrolyte copper) [Metals]					kg	37800	37800	0	primary data	Copper (99.999%; electrolyte copper) [Metals]	DE	Copper mix (99,999% from electrolysis)	GaBi SP40
		I	Electricity [Electric power]					MJ	87731.7	87731.7	0	primary data	Electricity [Electric power]	DE	Electricity grid mix 1kV-60kV	GaBi SP40
		I	Thermal energy (MJ) [Thermal energy]					MJ	850.311	850.311	0	primary data	Thermal energy (MJ) [Thermal energy]	DE	District heating mix (EN15804 B6)	GaBi SP40
	I	J_box adhesive [silicone sealant]						kg	336	336	0	primary data	Silicone-based sealant [Plastics]	DE	Sealants based on silicone - Deutsche Bauchemie e.V. (DBC) (A5)	GaBi SP40
	I	J_box_Sets [3 J-boxes]						pcs	500000	500000	0	primary data	j-box set (3 junction boxes)	DE	j-box set (3 junction boxes)	modelled item
		I	injection moulding [allocatable product]					kg	250000	250000	0	primary data	injection moulding [allocatable product]	RER	injection moulding	ecoinvent 3.5
		I	polyethylene terephthalate, granulate, amorphous [allocatable product]					kg	177500	177500	0	primary data	polyethylene terephthalate, granulate, amorphous [allocatable product]	GLO	market for polyethylene terephthalate, granulate, amorphous	ecoinvent 3.5
		I	polyethylene, high density, granulate [allocatable product]					kg	27500	27500	0	primary data	polyethylene, high density, granulate [allocatable product]	GLO	market for polyethylene, high density, granulate	ecoinvent 3.5
		I	polypropylene, granulate [allocatable product]					kg	45000	45000	0	primary data	polypropylene, granulate [allocatable product]	GLO	market for polypropylene, granulate	ecoinvent 3.5
	I	Encapsulant [EVA]						kg	1500	1500	0	primary data	ethylene vinyl acetate copolymer [allocatable product]	RER	market for ethylene vinyl acetate copolymer	ecoinvent 3.5
	I	SWCT_foil [PET]						kg	13000	13000	0	primary data	packaging film, low density polyethylene [allocatable product]	GLO	market for packaging film, low density polyethylene	ecoinvent 3.5
	I	SWCT_wires [Cu]						kg	75100	75100	0	primary data	copper smartwires (SWCT wires)	DE	copper smartwires (SWCT wires)	modelled item
		I	Copper (99.999%; electrolyte copper) [Metals]					kg	75100	75100	0	primary data	Copper (99.999%; electrolyte copper) [Metals]	DE	Copper mix (99,999% from electrolysis)	GaBi SP40
		I	Electricity [Electric power]					MJ	387423	387423	0	primary data	Electricity [Electric power]	DE	Electricity grid mix 1kV-60kV	GaBi SP40
		I	Thermal energy (MJ) [Thermal energy]					MJ	3755	3755	0	primary data	Thermal energy (MJ) [Thermal energy]	DE	District heating mix (EN15804 B6)	GaBi SP40
	I	Electricity [process]						MJ	7.36397e+07	7.36397e+07	0	primary data	Electricity [Electric power]	DE	Electricity grid mix 1kV-60kV	GaBi SP40
	I	cooling water, conditioned [process cooling]						m³	8795.31	8795.31	0	primary data	cooling water, conditioned [process cooling]	DE	X.05 - process cooling (water)	modelled item
	I	Clean dry air (CDA)						m³	15088	15088	0	primary data	Compressed air, 14 bar, low efficiency [Mechanical energy]	De	X.06 - air compressor	modelled item
	O	Mixed metals						t	5	5	0	primary data	Mixed metals	DE	RECOVERY | Mixed metals (electronics scrap)	modelled item
		I	metal part of electronics scrap, in blister-copper [allocatable product]					t	5	5	0	primary data	metal part of electronics scrap, in blister-copper [allocatable product]	RoW	treatment of electronics scrap, metals recovery in copper smelter	ecoinvent 3.5
		O	electronics scrap [39: Wastes or scraps]					t	5	5	0	primary data	electronics scrap [39: Wastes or scraps]	GLO	market for electronics scrap	ecoinvent 3.5
	O	defective parts (cells / modules etc.)						t	1	1	0	primary data	defective cells [waste to treatment]	DE	MIXER | defective parts [waste, from wafer production|hazardous waste]	modelled item
		O	waste, from silicon wafer production					t	0.95	0.95	0	primary data	waste, from silicon wafer production [Waste]	DE	treatment of waste, from silicon wafer production, underground deposit	ecoinvent 3.5
		O	hazardous waste (to treatment)					t	0.05	0.05	0	primary data	Hazardous waste (unspec.) [Hazardous waste]	DE	Hazardous waste (statistical average) (no C, worst case scenario incl. landfill)	GaBi SP40
	O	cooling water, used [process cooling]						m³	2198.83	2198.83	0	primary data	cooling water, used [process cooling]	DE	X.05 - process cooling (water)	modelled item
	O	module [assembled]						pcs	483538	483538	0	primary data	module [assembled]	DE	C.02 - module packaging	modelled item
	C.02	module packaging
	I	module [assembled]						pcs	483538	483538	0	primary data	module [assembled]	DE	C.01 - module assembly	modelled item
	I	cardboard boxes						pcs	24176.9	24176.9	0	primary data	corrugated board box [allocatable product]	RER	market for corrugated board box	ecoinvent 3.5
	I	EUR-flat pallet						kg	589916	589916	0	primary data	EUR-flat pallet [allocatable product]	GLO	market for EUR-flat pallet	ecoinvent 3.5
	O	module [ready for operation]						pcs	483538	483538	0	primary data	module [ready for operation]	DE	module, at plant gate	modelled item
	X.01	exhaust abatement
	I	exhaust [process gas, to abatement]						m3	1	1	0	primary data	exhaust [process gas, to abatement]	DE	X.09 - process exhaust ventilators	modelled item
	I	potassium hydroxide [50% in H2O, technical grade]						l	-	0.0322222	1	primary data	potassium hydroxide (50% in H2O)	DE	preparation of potassium hydroxide (50% in H2O)	modelled item
		I	potassium hydroxide [34231: Chemical elements n.e.c.; inorganic acids except phosphoric, nitric and sulphonitric; inorganic oxygen compoun[…]]					kg	-	1.61111e-05	1	primary data	potassium hydroxide [34231: Chemical elements n.e.c.; inorganic acids except phosphoric, nitric and sulphonitric; inorganic oxygen compoun[…]]	GLO	market for potassium hydroxide	ecoinvent 3.5
		I	water, ultrapure [allocatable product]					kg	-	0.0161111	1	primary data	water, ultrapure [allocatable product]	GLO	market for water, ultrapure	ecoinvent 3.5
	I	electricity [process]						MJ	1	1	0	primary data	Electricity [Electric power]	DE	Electricity grid mix 1kV-60kV	GaBi SP40
	I	ultra pure water [dionized]						kg	27.7778	27.7778	0	primary data	water, ultrapure	DE	X.03 - ultrapure water system	modelled item
	I	natural gas						m³	0.232	0.232	0	primary data	Natural gas, at consumer Germany [Natural gas, at consumer]	DE	Natural gas mix	GaBi SP40
	I	clean dry air (CDA)						m³	4	4	0	primary data	Compressed air, 14 bar, low efficiency [Mechanical energy]	De	X.06 - air compressor	modelled item
	O	process exhausts [emissions]						m3	40	40	0	primary data	emission [direct, to air]	DE	emission [direct, to air]	modelled item
		O	Boron trioxide [proxy] [ecoinvent long-term to air]					kg	7.6229	7.6229	0	primary data	Boron trioxide [proxy] [ecoinvent long-term to air]	DE	emission to air	ecoinvent 3.5
		O	Hydrogen fluoride [ecoinvent long-term to air]					kg	80.6472	80.6472	0	primary data	Hydrogen fluoride [ecoinvent long-term to air]	DE	emission to air	ecoinvent 3.5
		O	Nitrogen fluoride [ecoinvent long-term to air]					kg	455.832	455.832	0	primary data	Nitrogen fluoride [ecoinvent long-term to air]	DE	emission to air	ecoinvent 3.5
		O	Nitrogen oxides [ecoinvent long-term to air]					kg	38184.7	38184.7	0	primary data	Nitrogen oxides [ecoinvent long-term to air]	DE	emission to air	ecoinvent 3.5
		O	Phosphorus-pent-oxide [Inorganic emissions to air]					kg	24.5448	24.5448	0	primary data	Phosphorus-pent-oxide [Inorganic emissions to air]	DE	emission to air	GaBi SP40
		O	Silicon dioxide (silica) [Particles to air]					kg	24.5448	24.5448	0	primary data	Silicon dioxide (silica) [Particles to air]	DE	emission to air	GaBi SP40
	O	exhaust [general]						m³	170.94	170.94	0	primary data	exhaust [general, to air filter]	DE	X.09 - process exhaust ventilators	modelled item
	O	waste water [drain fluoride, rinse]						m³	0.0222222	0.0222222	0	primary data	waste water [to inhouse treatment]	DE	X.04 - inhouse waste water treatment	modelled item
	X.02	tray cleaning
	I	tray, used						pcs	1	1	0	primary data	tray, used	DE	B.11 - curing (cell)	modelled item
	I	H3PO4 [85% in H2O]						l	0.000248209	0.000248209	0	primary data	phosphoric acid (85% H3PO4)	DE	preparation of phosphoric acid (85% H3PO4)	modelled item
		I	Phosphorus-pent-oxide [Inorganic intermediate products]					m3	2.10978e-07	2.10978e-07	0	primary data	Phosphorus-pent-oxide [Inorganic intermediate products]	DE	Phosphoric acid (100%) (wet process)	GaBi SP40
		I	water, ultrapure [allocatable product]					kg	3.72314e-05	3.72314e-05	0	primary data	water, ultrapure [allocatable product]	GLO	market for water, ultrapure	ecoinvent 3.5
	I	electricity [process]						MJ	0.0268066	0.0268066	0	primary data	Electricity [Electric power]	DE	Electricity grid mix 1kV-60kV	GaBi SP40
	I	industrial city water [process, tap water]						m³	3.97134e-06	3.97134e-06	0	primary data	Water (tap water) [Operating materials]	DE	Tap water from groundwater	GaBi SP40
	O	waste water [drain acid]						m³	2.48209e-06	2.48209e-06	0	primary data	wastewater from PV cell production [39920: Sewage sludge]	DE	external waste water treatment [drain acid - X.02]	modelled item
		I	transport, freight, lorry, unspecified [allocatable product]					tkm	0.000191121	0.000191121	0	primary data	transport, freight, lorry, unspecified [allocatable product]	GLO	market group for transport, freight, lorry, unspecified	ecoinvent 3.5
		O	wastewater from PV cell production [39920: Sewage sludge]					m3	2.48209e-06	2.48209e-06	0	primary data	wastewater from PV cell production [39920: Sewage sludge]	CH	treatment of wastewater from PV cell production, capacity 5E9l/year	ecoinvent 3.5
	O	exhaust [acidic, to air washer]						m³	0.148925	0.148925	0	primary data	exhaust [acidic, to air washer]	DE	X.09 - process exhaust ventilators	modelled item
	O	tray, cleaned						pcs	1	1	0	primary data	tray, cleaned	DE	B.02 - PECVD of thin film layer (a-Si:H)	modelled item
	X.03	ultra pure water system
	I	electricity [process]						MJ	26.1818	26.1818	0	primary data	Electricity [Electric power]	DE	Electricity grid mix 1kV-60kV	GaBi SP40
	I	industrial city water [process, tap water]						m³	3.63855	3.63855	0	primary data	Water (tap water) [Operating materials]	DE	Tap water from groundwater	GaBi SP40
	I	clean dry air (CDA)						m³	0.00109091	0.00109091	0	primary data	Compressed air, 14 bar, low efficiency [Mechanical energy]	De	X.06 - air compressor	modelled item
	I	ion-exchanger for water treatment [allocatable product]						psc.	3.27273e-07	3.27273e-07	0	primary data	ion-exchanger for water treatment [allocatable product]	CH	ion-exchanger production for water treatment	ecoinvent 3.5
	O	water, ultrapure						kg	2307.27	2307.27	0	primary data	water, ultrapure	DE	B.01|X.01|X.07|X.08	modelled item
	O	waste water [industrial waste water]						m³	1	1	0	primary data	Water (waste water, untreated) [Production residues in life cycle]	DE	Municipal waste water treatment (mix)	GaBi SP40
	X.04	in-house waste water treatment
	I	waste water [to inhouse treatment]						m3	1	1	0	primary data	waste water [to inhouse treatment]	DE	B.01|X.07|X.08	modelled item
	I	hydrogen chloride [36% in H2O, VLSI grade]						l	0.457562	0.472849	0.0323291	primary data	hydrogen chloride (36% in H2O)	DE	preparation of hydrogen chloride (36% in H2O)	modelled item
		I	Hydrochloric acid (100%) [Inorganic intermediate products]					m3	0.000164722	0.000170226	0.0323291	primary data	Hydrochloric acid (100%) [Inorganic intermediate products]	DE	Hydrochloric acid mix (100%)	GaBi SP40
		I	water, ultrapure [allocatable product]					kg	0.29284	0.302623	0.0323291	primary data	water, ultrapure [allocatable product]	GLO	market for water, ultrapure	ecoinvent 3.5
	I	natrium hydroxide [50% in H2O]						l	0.716085	0.739953	0.0322555	primary data	Sodium hydroxide (50%; caustic soda) [Inorganic intermediate products]	DE	Sodium hydroxide mix (50%)	GaBi SP40
	I	iron(III) chloride [FeCl3]						l	0.44231	0.457053	0.0322555	primary data	iron(III) chloride, without water, in 14% iron solution state [allocatable product]	GLO	market for iron(III) chloride, without water, in 14% iron solution state	ecoinvent 3.5
	I	calcium chloride [CaCl2]						l	0.32792	0.338849	0.0322555	primary data	calcium chloride [34240: Phosphates of triammonium; salts and peroxysalts of inorganic acids and metals n.e.c.]	RER	market for calcium chloride	ecoinvent 3.5
	I	flocculent [FHM (aluminium sulfate)]						l	0.407536	0.421119	0.0322555	primary data	aluminium sulfate, powder [allocatable product]	RER	market for aluminium sulfate, powder	ecoinvent 3.5
	I	electricity [process]						MJ	78.8022	78.8022	0	primary data	Electricity [Electric power]	DE	Electricity grid mix 1kV-60kV	GaBi SP40
	I	clean dry air (CDA)						m³	78.8022	78.8022	0	primary data	Compressed air, 14 bar, low efficiency [Mechanical energy]	De	X.06 - air compressor	modelled item
	O	water [recycled]						t	252.337	315.209	0.19946	primary data	tap water [allocatable product]	DE	Tap water from groundwater	GaBi SP40
	O	waste water [industrial waste water]						m³	0.685579	0.685579	0	primary data	Water (waste water, untreated) [Production residues in life cycle]	DE	Municipal waste water treatment (mix)	GaBi SP40
	O	slurry from waste water treatment, Abfall-Code: 11 01 09						t	0.144193	0.179791	0.197996	primary data	Sludge [Hazardous waste]	DE	Sludge (acid/basic)	GaBi SP40
	O	exhaust [acidic, to air washer]						m³	78.8022	78.8022	0	primary data	exhaust [acidic, to acidic air washer]	DE	X.09 - process exhaust ventilators	modelled item
	O	exhaust [caustic, to air washer]						m³	47.2813	47.2813	0	primary data	exhaust [caustic, to air washer]	DE	X.09 - process exhaust ventilators	modelled item
	X.05	process cooling (water)
	I	cooling water, used [process cooling]						m3	1	1	0	primary data	cooling water, used [process cooling]	DE	B.02|B.03|B.04|B.05|B.06|B.07|B.08|B.09|C.01	modelled item
		O	cooling water (to waste water treatment)					m³	0.75	0.75	0	primary data	Water (waste water, untreated) [Production residues in life cycle]	DE	Municipal waste water treatment (mix)	GaBi SP40
		O	cooling water (recirculation)					m³	0.75	0.75	0	primary data	cooling water (to recirculation)	DE	X.05 - process cooling (water)	modelled item
	I	electricity [process]						MJ	0.165705	0.165705	0	primary data	Electricity [Electric power]	DE	Electricity grid mix 1kV-60kV	GaBi SP40
	O	cooling water, conditioned [process cooling]						m3	1.0101	1.0101	0	primary data	cooling water, conditioned [process cooling]	DE	B.02|B.03|B.04|B.05|B.06|B.07|B.08|B.09|C.01	modelled item
		I	cooling water (tap water)					m3	0.252525	0.252525	0	primary data	Water (tap water) [Operating materials]	DE	Tap water from groundwater	GaBi SP40
		I	cooling water (recirculation)					m3	0.757576	0.757576	0	primary data	cooling water (to recirculation)	DE	X.05 - process cooling (water)	modelled item
	X.06	air compressor
	I	Compressed air, 14 bar, low efficiency [Mechanical energy]						m3	1	1	0	primary data	Compressed air, 14 bar, low efficiency [Mechanical energy]	EU-28	Compressed air	GaBi SP40
	O	clean dry air (CDA)						m3	1	1	0	primary data	Compressed air, 14 bar, low efficiency [Mechanical energy]	DE	B.01|B.02|B.03|B.04|B.05|B.06|B.07|B.08|B.09|B.10|B.11|B.12|X.01|X.03|X.04|X.06	modelled item
	X.07	acidic exhaust air washer
	I	exhaust [acidic, to acidic air washer]						m3	1	1	0	primary data	exhaust [acidic, to acidic air washer]	DE	X.09 - process exhaust ventilators	modelled item
	I	natrium hydroxide [50% in H2O]						l	0.000382716	0.000382716	0	primary data	Sodium hydroxide (50%; caustic soda) [Inorganic intermediate products]	DE	Sodium hydroxide mix (50%)	GaBi SP40
	I	electricity [process]						MJ	0.00911111	0.00911111	0	primary data	Electricity [Electric power]	DE	Electricity grid mix 1kV-60kV	GaBi SP40
	I	ultra pure water [dionized]						kg	0.153086	0.153086	0	primary data	water, ultrapure	DE	X.03 - ultrapure water system	modelled item
	O	waste water [drain fluoride, rinse]						m³	0.000148148	0.000148148	0	primary data	waste water [to inhouse treatment]	DE	X.04 - inhouse waste water treatment	modelled item
	X.08	caustic exhaust air washer
	I	exhaust [caustic, to caustic air washer]						m3	1	1	0	primary data	exhaust [caustic, to caustic air washer]	DE	X.09 - process exhaust ventilators	modelled item
	I	sulfuric acid [95% in H2O]						l	0.000421053	0.000421053	0	primary data	Sulphuric acid aq. (96%) [Inorganic intermediate products]	DE	Sulphuric acid (96%)	GaBi SP40
	I	electricity [process]						MJ	0.0113684	0.0113684	0	primary data	Electricity [Electric power]	DE	Electricity grid mix 1kV-60kV	GaBi SP40
	I	ultra pure water [dionized]						kg	0.111842	0.111842	0	primary data	water, ultrapure	DE	X.03 - ultrapure water system	modelled item
	O	waste water [drain caustic]						m³	0.000105263	0.000105263	0	primary data	waste water [to inhouse treatment]	DE	X.04 - inhouse waste water treatment	modelled item
	X.09	process exhaust ventilators
	I	exhaust [process gas, to abatement]						m3	1	1	0	primary data	exhaust [process gas, to abatement]	DE	B.02 - PECVD of a-Si:H (deposition thin film layer)	modelled item
	I	exhaust [volatile organic compounds - VOC, to air]						m3	1	1	0	primary data	exhaust [volatile organic compounds - VOC, to air]	DE	B.10|B.11	modelled item
	I	exhaust [general (wet), to air]						m3	1	1	0	primary data	exhaust [general (wet), to air]	DE	B.01 - wafer cleaning/ texturing (wet chemistry)	modelled item
	I	exhaust [caustic, to air washer]						m3	1	1	0	primary data	exhaust [caustic, to air washer]	DE	B.01|X.04	modelled item
	I	exhaust [acidic, to air washer]						m3	1	1	0	primary data	exhaust [acidic, to air washer]	DE	B.01|X.02|X.04	modelled item
	I	exhaust [general, to air filter]						m3	1	1	0	primary data	exhaust [general, to air filter]	DE	B.02|B.03|B.04|B.05|B.06|B.07|B.08|B.09|B.11	modelled item
	I	electricity [process]						MJ	0.00618813	0.00618813	0	primary data	Electricity [Electric power]	DE	Electricity grid mix 1kV-60kV	GaBi SP40
	O	exhaust [process gas, to abatement]						m3	1	1	0	primary data	exhaust [process gas, to abatement]	DE	X.01 - exhaust abatement [default]	modelled item
	O	exhaust [volatile organic compounds - VOC, to air]						m3	1	1	0	primary data	exhaust [volatile organic compounds - VOC, to air]	DE	exhaust (VOC) to air	modelled item
		O	Diethylene glycol mono-n-butyl ether [Group NMVOC to air]					kg	1.14077e-05	1.14077e-05	0	primary data	Diethylene glycol mono-n-butyl ether [Group NMVOC to air]	DE	emission to air	GaBi SP40
	O	exhaust [general (wet), to air]						m3	1	1	0	primary data	exhaust [general (wet), to air]	DE	exhaust [general (wet), to air]	modelled item
		O	Waste heat [Other emissions to air]					MJ	0.00985721	0.00985721	0	primary data	Waste heat [Other emissions to air]	DE	emission to air	GaBi SP40
		O	Water [Inorganic emissions to air]					m3	3.9927e-05	3.9927e-05	0	primary data	Water [Inorganic emissions to air]	DE	emission to air	GaBi SP40
	O	exhaust [caustic, to caustic air washer]						m3	1	1	0	primary data	exhaust [caustic, to caustic air washer]	DE	X.08 - caustic exhaust air washer	modelled item
	O	exhaust [acidic, to acidic air washer]						m3	1	1	0	primary data	exhaust [acidic, to acidic air washer]	DE	X.07 - acidic exhaust air washer	modelled item
	O	exhaust [general, to air filter]						m3	1	1	0	primary data	exhaust [general, to air filter]	DE	X.10 - exhaust filter system	modelled item
	X.10	exhaust filter system
	I	exhaust [general, to air filter]						m3	1	1	0	primary data	exhaust [general, to air filter]	DE	X.09 - process exhaust ventilators	modelled item
	I	air filter, central unit, 600 m3/h [allocatable product]						pcs	7.60514e-07	7.60514e-07	0	primary data	air filter, central unit, 600 m3/h [allocatable product]	GLO	market for air filter, central unit, 600 m3/h	ecoinvent 3.5
	O	used air filter central unit, 600 m3/h [waste, to treatment]						pcs	7.60514e-07	7.60514e-07	0	primary data	used air filter central unit, 600 m3/h [Waste]	RoW	treatment of used air filter, central unit, 600 m3/h	ecoinvent 3.5
