# Supplementary material for: New insights into the environmental performance of perovskite-on-silicon tandem solar cells – a life cycle assessment of industrially manufactured modules
Source: Royal Society of Chemistry journal article supplement (doi:10.1039/d2se00096b), 2022-01-01
Supplement: d2se00096b3.xlsx [file d2se00096b3.xlsx]

## Sheet: orientation guide
Assessed life cycle models:
perovskite-on-silicon tandem cell (PST) module
hetero-junction solar cell (SHJ) module
LCIA method:
ReCiPe 2016 v1.1 Midpoint (H)
Result presentation:
amount per unit (_unit)
amount relative to total life cycle impact (_relative)
Impact categories:	abbr. CFm*	unit
climate change, default, excl biogenic carbon	GWP	kg CO2 eq.
climate change, incl biogenic carbon	GWP(+BC)	kg CO2 eq.
fine particulate matter formation	PMFP	kg PM2.5 eq.
fossil depletion	FDP	kg oil eq.
freshwater consumption	FWC	m3
freshwater ecotoxicity	FETP	kg 1,4 DB eq.
freshwater eutrophication	FEP	kg P eq.
human toxicity, cancer	HTP(C)	kg 1,4-DB eq.
human toxicity, non-cancer	HTP(NC)	kg 1,4-DB eq.
ionizing radiation	IRP	kBq Co-60 eq. to air
land use	LU	Annual crop eq.·y
marine ecotoxicity	METP	kg 1,4-DB eq.
marine eutrophication	MEP	kg N eq.
metal depletion	MDP	kg Cu eq.
photochemical ozone formation, ecosystems	POFP(E)	kg NOx eq.
photochemical ozone formation, human health	POFP(HH)	kg NOx eq.
stratospheric ozone depletion	POFP	kg CFC-11 eq.
terrestrial acidification	TAP	kg SO2 eq.
terrestrial ecotoxicity	TETP	kg 1,4-DB eq.
*abbreviation characteristaion factor at midpoint level

## Sheet: PST_unit
Inventory item							GWP	GWP(+BC)	PMFP	FDP	FWC	FETP	FEP	HTP(C)	HTP(NC)	IRP	LU	METP	MEP	MDP	POFP(E)	POFP(HH)	POFP	TAP	TETP
Life Cycle ProTandem module [Lead emissions] -rev5- (008*) <LC>							434	434	0.684	164	14.2	3.53	0.21	19.2	421	71	17.2	5.49	0.0305	2.03	0.869	0.855	0.000204	1.58	598
	CN: A - wafer production (007) <Mfg>						298	301	0.525	123	13.3	3	0.19	17.6	313	67.7	8.09	3.94	0.0252	0.563	0.592	0.583	0.000145	1.17	341
		CN: A.01 - wafer fabrication (007) <Mfg>					296	299	0.522	121	13.3	2.99	0.19	17.5	312	67.6	7.6	3.92	0.0252	0.56	0.587	0.577	0.000145	1.16	337
			CH: market for brass ecoinvent 3.5				0.0607	0.0597	0.00111	0.0185	0.000862	0.0212	0.000843	0.0402	7.75	0.00326	0.00426	0.035	5.42e-05	0.0135	0.000513	0.000504	1.09e-07	0.00322	18.5
			CN: Electricity grid mix 1kV-60kV ts				12.1	12.1	0.00975	2.83	0.0942	0.000552	3.78e-06	0.00535	0.53	0.0226	0.081	0.00396	7.84e-05	0.00711	0.0228	0.0227	2.11e-06	0.0277	4.61
			CN: single-Si wafer production, photovoltaic (007) ecoinvent 3.5 <u-so>				0	0	0	0	-0.105	0.0219	0.000314	0.00162	0.683	0	0	0.0268	0.00565	0	0	0	0	0	1.36e-18
			CN: Thermal energy from natural gas ts				0.523	0.523	0.000118	0.201	2.13e-05	2.18e-05	1.66e-08	0.00018	0.0021	1.48e-05	0.000182	3.52e-05	1.14e-07	0.000116	0.000723	0.000716	2.06e-07	0.000329	0.0196
			EU-28: Tap water from groundwater ts				9.99e-07	1.07e-06	4.58e-10	3.26e-07	1.14e-05	2.22e-09	1.31e-10	1.09e-08	5.26e-07	9.68e-09	2.08e-08	3.18e-09	2.54e-10	2.41e-07	1.33e-09	1.32e-09	7.31e-13	1.17e-09	2.64e-07
			GLO: glass wool mat production, without cullet ecoinvent 3.5				0.0626	0.0624	0.000131	0.0234	0.000667	0.000738	2.88e-05	0.00551	0.0752	0.00553	0.0011	0.000994	2.61e-06	0.000153	0.000183	0.00018	3.06e-08	0.000288	0.104
			GLO: market for acetic acid, without water, in 98% solution state ecoinvent 3.5				0.129	0.129	0.000234	0.086	0.00339	0.00121	5.05e-05	0.00458	0.162	0.00984	0.00212	0.00174	3.66e-06	0.000347	0.000323	0.000302	6.62e-08	0.000489	0.342
			GLO: market for alkylbenzene sulfonate, linear, petrochemical ecoinvent 3.5				0.778	0.776	0.00154	0.633	0.00936	0.0148	0.00029	0.034	1.05	0.0212	0.0182	0.0197	2.37e-05	0.00257	0.00241	0.00226	2.38e-07	0.00355	2.75
			GLO: market for silicon carbide ecoinvent 3.5				35.7	35.7	0.0702	11.1	0.224	0.271	0.0157	1.18	24.4	4.4	0.548	0.355	0.00113	0.0164	0.0682	0.0676	1.2e-05	0.139	30.4
			GLO: market for sodium hydroxide, without water, in 50% solution state ecoinvent 3.5				0.0391	0.0389	9.04e-05	0.014	0.00099	0.000463	2.26e-05	0.00194	0.059	0.00447	0.000783	0.000642	2.27e-06	0.000106	9.97e-05	9.87e-05	4.2e-08	0.000156	0.12
			GLO: market for steel, low-alloyed, hot rolled ecoinvent 3.5				5.49	5.47	0.0135	1.8	0.0581	0.186	0.00502	4.19	27.3	0.227	0.106	0.272	0.000197	0.287	0.0164	0.0155	1.64e-06	0.0198	54.6
			GLO: market for wafer factory ecoinvent 3.5				0.744	0.699	0.00232	0.222	0.0063	0.0383	0.000904	0.205	6.95	0.0355	0.0782	0.0567	0.000101	0.0294	0.0024	0.00232	3.24e-07	0.00574	18.8
			GLO: market for waste, from silicon wafer production ecoinvent 3.5				0.027	0.0224	5.27e-05	0.00859	0.000152	0.000188	1.01e-05	0.00318	0.0196	0.000555	0.00418	0.000362	7.11e-07	0.000873	0.000105	0.000101	8.03e-09	9.89e-05	0.175
			GLO: market for water, completely softened, from decarbonised water, at user ecoinvent 3.5				0.00304	0.00326	5.51e-06	0.000847	0.116	5.65e-05	1.06e-06	0.000404	0.00541	0.00011	9.27e-05	8.25e-05	3.1e-07	6.01e-05	8.35e-06	8.07e-06	9.85e-10	9.36e-06	0.0214
			GLO: market for wire drawing, steel ecoinvent 3.5				0.879404	0.849319	0.00154699	0.245631	0.0453968	0.0241431	0.000410753	0.738178	1.06448	0.0363724	0.0317616	0.0327294	6.52762e-05	0.0114286	0.00182871	0.0017491	3.59734e-07	0.00263479	1.34152
			RER: hydrochloric acid production, from the reaction of hydrogen with chlorine ecoinvent 3.5				0.00496551	0.00501143	9.40315e-06	0.00248244	0.000160843	9.77958e-05	4.85183e-06	0.00036347	0.0129986	0.00191949	0.000203149	0.000133565	4.36757e-07	2.52283e-05	1.10674e-05	1.09101e-05	5.82297e-09	2.56887e-05	0.0234066
			RER: market for acrylic binder, without water, in 34% solution state ecoinvent 3.5				0.00547879	0.00547241	8.23335e-06	0.00327611	0.000126181	5.62395e-05	2.21907e-06	0.000269356	0.00977578	0.000548121	0.000140607	8.18176e-05	1.5632e-07	1.85e-05	1.26252e-05	1.18718e-05	1.79027e-09	2.02097e-05	0.0192532
			RER: market for dipropylene glycol monomethyl ether ecoinvent 3.5				2.43224	2.43571	0.00385315	1.3218	0.0559366	0.0263099	0.00122295	0.106222	3.49464	0.367943	0.0483234	0.0365523	0.000112906	0.00668307	0.00560824	0.00527253	1.78071e-06	0.00856367	6.69335
			RER: market for silicon, single crystal, Czochralski process, photovoltaics ecoinvent 3.5				230.245	233.679	0.410907	98.2617	12.667	2.31975	0.162682	10.7622	230.882	61.4361	6.56312	2.99225	0.0175334	0.168184	0.451974	0.445566	0.000124595	0.928806	183.522
			RER: market for triethylene glycol ecoinvent 3.5				6.56962	6.59908	0.00692268	4.66498	0.111645	0.0592765	0.00259429	0.233544	7.67696	1.01833	0.113613	0.0821	0.000187062	0.0157357	0.0130023	0.0121232	1.26462e-06	0.0201635	14.8039
		CN: A.02 - wafer packaging (007) <Mfg>					2.42541	1.97117	0.00268701	1.28717	0.0438562	0.0129246	0.000361265	0.0597442	0.890898	0.0670767	0.488495	0.0182953	7.56917e-05	0.00319574	0.00548018	0.0051831	3.79247e-07	0.00718171	2.84003
			GLO: market for packaging film, low density polyethylene ecoinvent 3.5				0.574496	0.560451	0.000649974	0.385983	0.00766551	0.00286579	7.03096e-05	0.0174256	0.173499	0.0213629	0.0157469	0.00412142	1.13596e-05	0.000244174	0.00141449	0.00130477	5.90329e-08	0.00176969	0.641252
			GLO: market for polystyrene, high impact ecoinvent 3.5				1.47832	1.48333	0.00125709	0.747701	0.0197433	0.00456812	2.15271e-05	0.0238126	0.182253	0.000954707	0.00160823	0.00634263	8.6958e-06	0.000237042	0.00274689	0.00259321	2.08567e-08	0.00389686	0.774597
			RER: paper production, woodfree, coated, at integrated mill ecoinvent 3.5				0.372596	-0.0726119	0.000779951	0.15349	0.0164474	0.00549064	0.000269428	0.0185059	0.535147	0.0447591	0.47114	0.0078312	5.56363e-05	0.00271453	0.0013188	0.00128512	2.99357e-07	0.00151516	1.42418
		CN: A.03 - wafer transport (007) <Mfg>					0.044174	0.0441528	0.000104887	0.0158055	0.000131167	0.000232639	4.35777e-06	0.000954751	0.0298545	0.00106326	0.00189307	0.00084807	4.51992e-07	8.62596e-05	0.000318634	0.000313975	1.97281e-08	0.000282713	0.787968
			GLO: market group for transport, freight train ecoinvent 3.5				0.000598154	0.000596659	1.35454e-06	0.000193207	2.92477e-06	4.56955e-06	1.70678e-07	4.82289e-05	0.000513145	3.02218e-05	2.66471e-05	6.83384e-06	1.15639e-08	3.45407e-06	5.3945e-06	5.32298e-06	2.6235e-10	3.04434e-06	0.00165506
			GLO: market group for transport, freight, lorry, unspecified ecoinvent 3.5				0.0334265	0.0334249	4.82027e-05	0.0121459	9.81089e-05	0.000199455	2.78499e-06	0.00070541	0.026541	0.000629439	0.00178316	0.000797958	3.28541e-07	6.58517e-05	0.000181747	0.000178197	1.47056e-08	0.000110801	0.780176
			GLO: transport, freight, sea, transoceanic ship ecoinvent 3.5				0.0100544	0.0100583	5.51413e-05	0.00343736	2.95194e-05	2.79168e-05	1.35812e-06	0.000186981	0.00273254	0.000401832	6.49563e-05	4.22292e-05	1.08882e-07	1.28689e-05	0.000131219	0.000130199	4.73739e-09	0.000168553	0.00590566
			RoW: treatment of waste, from silicon wafer production, underground deposit ecoinvent 3.5				9.49634e-05	7.29993e-05	1.88081e-07	2.90017e-05	6.13493e-07	6.976e-07	4.39777e-08	1.41308e-05	6.77572e-05	1.76875e-06	1.83088e-05	1.04847e-06	3.00456e-09	4.08496e-06	2.73994e-07	2.55938e-07	2.28108e-11	3.1504e-07	0.000230747
	DE: B - cell manufacturing [default] -rev5- (008*) <Mfg>						41.1144	41.3757	0.0549468	12.1532	0.235855	0.37564	0.0138026	1.08275	80.4768	1.04263	2.14172	1.25456	0.00269073	0.742689	0.0716707	0.0695024	3.01026e-05	0.100671	62.017
		DE: B.01 - wafer cleaning/ texturing (wet chemistry) -rev4- (001) <Mfg>					5.46986	5.44585	0.00384165	1.78138	0.331783	0.0348544	0.000684305	0.0583582	2.07133	0.163185	0.349891	0.0487296	0.000179402	0.0182779	0.0079311	0.00778481	2.55522e-06	0.00957858	6.44299
			DE: Preparation of CellTex proxy <LC>				0.267338	0.267161	0.000274353	0.179392	0.00321893	0.0012653	0.000126847	0.00682252	0.184655	0.00526598	0.00683517	0.00244219	8.80766e-06	0.000624119	0.000904238	0.000831873	5.15818e-08	0.000731621	1.23561
				DE: Sodium hydroxide (caustic soda) mix (100%) ts			0.0192434	0.0191784	8.36779e-06	0.00594998	6.758e-05	1.50655e-06	8.14272e-08	6.88751e-06	0.000544807	0.000230101	0.00112802	4.34331e-06	6.17594e-07	5.66368e-05	3.38804e-05	3.35936e-05	7.79545e-09	2.47681e-05	0.0051873
				GLO: market for water, ultrapure ecoinvent 3.5			0.0574271	0.0573798	0.000100535	0.0199812	0.00149483	0.000377192	4.75243e-05	0.00254264	0.0463248	0.00185603	0.00282765	0.00108793	6.35999e-06	0.00019352	0.000386239	0.000379977	2.63645e-08	0.00022836	0.878242
				RER: market for ethanol, without water, in 99.7% solution state, from ethylene ecoinvent 3.5			0.190668	0.190602	0.00016545	0.153461	0.00165651	0.000886603	7.92417e-05	0.00427299	0.137786	0.00317986	0.0028795	0.00134991	1.83007e-06	0.000373962	0.000484119	0.000418302	1.74218e-08	0.000478493	0.352177
			DE: preparation of hydrogen chloride (36% in H2O) <Mfg>				0.00201754	0.0020177	1.14557e-06	0.000929006	1.30013e-05	2.69276e-06	3.07824e-07	1.70859e-05	0.000437876	2.07242e-05	6.14426e-05	8.01128e-06	7.64195e-08	6.75031e-06	4.58598e-06	4.48303e-06	9.34837e-10	2.99715e-06	0.00779285
				DE: Hydrochloric acid mix (100%) ts			0.00165385	0.00165432	5.08884e-07	0.000802465	3.53447e-06	3.03999e-07	6.85171e-09	9.8326e-07	0.000144501	8.96994e-06	4.35351e-05	1.12139e-06	3.61416e-08	5.52475e-06	2.13992e-06	2.07663e-06	7.6787e-10	1.55094e-06	0.00223093
				GLO: market for water, ultrapure ecoinvent 3.5			0.000363686	0.000363387	6.3669e-07	0.000126541	9.4668e-06	2.38876e-06	3.00972e-07	1.61026e-05	0.000293376	1.17542e-05	1.79075e-05	6.88989e-06	4.02779e-08	1.22556e-06	2.44606e-06	2.4064e-06	1.66967e-10	1.44621e-06	0.00556192
			DE: preparation of hydrogen fluoride (49% in H2O) <Mfg>				0.0738406	0.0732361	0.000382859	0.0432757	0.00373584	0.00131405	4.20205e-05	0.00431773	0.236438	0.00680851	0.00263	0.00218166	3.04996e-06	0.00059437	0.000299741	0.000294515	3.18542e-08	0.00118051	0.774159
				GLO: market for water, ultrapure ecoinvent 3.5			0.00248411	0.00248206	4.34882e-06	0.000864319	6.46616e-05	1.63161e-05	2.05575e-06	0.000109986	0.00200386	8.02856e-05	0.000122315	4.70604e-05	2.75112e-07	8.37104e-06	1.67074e-05	1.64366e-05	1.14044e-09	9.87812e-06	0.0379899
				RER: market for hydrogen fluoride ecoinvent 3.5			0.0713565	0.070754	0.00037851	0.0424114	0.00367118	0.00129774	3.99648e-05	0.00420774	0.234435	0.00672822	0.00250769	0.0021346	2.77485e-06	0.000585999	0.000283034	0.000278078	3.07137e-08	0.00117063	0.736169
			DE: preparation of potassium hydroxide (50% in H2O) <Mfg>				0.957844	0.9555	0.00192419	0.341135	0.00853899	0.0103844	0.000487423	0.0425315	1.47298	0.0814953	0.0271569	0.0146688	3.47477e-05	0.00316758	0.00229564	0.0022657	4.13836e-07	0.0036798	3.01307
				GLO: market for potassium hydroxide ecoinvent 3.5			0.949726	0.947388	0.00190998	0.33831	0.00832768	0.0103311	0.000480705	0.0421721	1.46644	0.081233	0.0267572	0.014515	3.38487e-05	0.00314022	0.00224104	0.00221199	4.10109e-07	0.00364752	2.88892
				GLO: market for water, ultrapure ecoinvent 3.5			0.008118	0.00811131	1.42118e-05	0.00282457	0.000211313	5.33205e-05	6.71813e-06	0.000359433	0.00654856	0.000262371	0.000399721	0.000153792	8.9906e-07	2.73563e-05	5.45994e-05	5.37143e-05	3.72694e-09	3.22814e-05	0.12415
			DE: X.03 - ultrapure water system -rev4- (001) <Mfg>				0.364403	0.364631	0.000114085	0.106206	0.300951	0.000135234	5.57904e-06	0.000860759	0.0265231	0.00568944	0.0266192	0.000243635	1.74109e-05	0.00705378	0.000391929	0.0003896	2.38432e-07	0.000350119	0.149511
				CH: ion-exchanger production for water treatment ecoinvent 3.5			0.00361175	0.00362194	5.18041e-06	0.00110345	3.45854e-05	5.57439e-05	7.61572e-07	0.000470649	0.00431129	0.00018862	7.34393e-05	8.94063e-05	1.48146e-07	9.15003e-05	6.032e-06	5.81068e-06	5.42148e-08	9.81265e-06	0.0332344
				DE: Electricity grid mix 1kV-60kV ts			0.333147	0.3313	9.67194e-05	0.096466	0.00128107	2.08231e-05	1.36609e-06	0.00010336	0.00776203	0.00537055	0.0258309	7.0194e-05	1.02978e-05	0.000616266	0.000348859	0.0003471	1.6356e-07	0.000309387	0.108535
				DE: Tap water from groundwater ts			0.0276381	0.0297028	1.21824e-05	0.00863364	0.299636	5.8667e-05	3.45132e-06	0.000286747	0.0144496	0.000129871	0.000714496	8.40332e-05	6.96487e-06	0.00634601	3.70312e-05	3.66819e-05	2.06548e-08	3.09105e-05	0.00773976
				DE: X.03 - ultra pure water system -rev4- (001) ecoinvent 3.5 <u-so>			1.42592e-10	1.42592e-10	0	0	-8.69879e-13	0	5.07983e-11	0	0	0	0	0	7.39808e-12	0	0	0	0	0	0
				EU-28: Compressed air ts			6.17493e-06	6.14409e-06	2.77881e-09	2.48943e-06	5.53104e-08	4.54797e-10	1.63876e-11	2.39072e-09	1.4261e-07	3.95763e-07	3.55756e-07	1.44735e-09	1.41522e-10	7.99993e-09	7.11401e-09	7.06828e-09	1.9635e-12	8.86555e-09	1.8137e-06
			CH: treatment of waste plastic, industrial electronics, municipal incineration ecoinvent 3.5				0.0307528	0.0307553	1.35319e-06	8.96972e-05	8.10295e-06	0.0210625	2.55871e-07	0.000864024	0.0453804	1.68619e-05	5.63636e-06	0.0277794	4.84377e-07	1.79712e-06	8.51082e-06	8.42279e-06	6.65261e-09	3.94621e-06	0.0012774
			CH: treatment of waste polystyrene, municipal incineration ecoinvent 3.5				0.0196297	0.0196306	4.05117e-07	2.12208e-05	3.19894e-06	0.000188271	2.17792e-08	0.000267963	0.00234825	3.29299e-06	1.41858e-06	0.00024073	4.26677e-08	7.97514e-07	2.6186e-06	2.5706e-06	5.93713e-10	1.15815e-06	0.000291378
			DE: Electricity grid mix 1kV-60kV ts				3.53448	3.51488	0.00102613	1.02344	0.0135913	0.000220919	1.44933e-05	0.00109659	0.0823502	0.0569781	0.274049	0.000744713	0.000109253	0.00653818	0.00370116	0.00368251	1.73527e-06	0.0032824	1.15148
			DE: Nitrogen (liquid) ts				0.0981174	0.0975763	2.8489e-05	0.0284111	0.000393628	6.14865e-06	4.03245e-07	3.0518e-05	0.00229009	0.00158157	0.00760697	2.0696e-05	3.03466e-06	0.000181888	0.00010276	0.000102242	4.81719e-08	9.11291e-05	0.0319656
			DE: Oxygen (liquid) ts				0.0112251	0.011163	3.25911e-06	0.00325035	4.42841e-05	7.02704e-07	4.60914e-08	3.48788e-06	0.000261811	0.000180946	0.000870302	2.36668e-06	3.47097e-07	2.0791e-05	1.17555e-05	1.16962e-05	5.51106e-09	1.04251e-05	0.00365699
			EU-28: Compressed air ts				0.0524096	0.0521478	2.35851e-05	0.021129	0.000469446	3.86009e-06	1.3909e-07	2.02912e-05	0.0012104	0.00335903	0.00301947	1.22844e-05	1.20117e-06	6.78993e-05	6.038e-05	5.99919e-05	1.66652e-08	7.52462e-05	0.0153937
			GLO: market for packaging film, low density polyethylene ecoinvent 3.5				0.0313457	0.0305794	3.54639e-05	0.02106	0.000418246	0.000156364	3.83624e-06	0.00095078	0.00946647	0.0011656	0.000859182	0.000224873	6.19805e-07	1.33226e-05	7.71774e-05	7.11908e-05	3.22096e-09	9.65582e-05	0.034988
			GLO: market for polystyrene foam slab ecoinvent 3.5				0.0264623	0.0265747	2.63291e-05	0.0130372	0.000396297	0.000113927	2.93106e-06	0.000574955	0.00698172	0.000619321	0.000176385	0.000160303	3.27185e-07	6.58533e-06	7.06053e-05	6.00194e-05	2.49812e-09	7.2666e-05	0.0238011
		DE: B.02 - PECVD of a-Si:H (deposition thin film layer) -rev4- (001) <Mfg>					3.21786	3.20249	0.00103301	0.966894	0.208526	0.00097942	6.53809e-05	0.00477504	0.173361	0.0696164	0.216364	0.00174604	9.61165e-05	0.00946884	0.00334321	0.00332154	1.3996e-06	0.00314969	1.06258
			GLO: preparation of phosphine [1% PH3 in H2] <Mfg>				0.000311372	0.000310206	5.60821e-07	0.000180242	4.55867e-06	2.43498e-06	9.45942e-07	1.15181e-05	0.00025282	3.52803e-05	7.68057e-06	3.22139e-06	1.46215e-08	1.03486e-05	6.95192e-07	6.76874e-07	1.21562e-10	1.04963e-06	0.000324163
				GLO: market for phosphane ecoinvent 3.5			0.000181368	0.000179727	4.62923e-07	7.98537e-05	2.0286e-06	1.86867e-06	9.22817e-07	8.78208e-06	0.000196067	2.61103e-05	6.76307e-06	2.45657e-06	1.19562e-08	1.02542e-05	4.88004e-07	4.83307e-07	8.57088e-11	7.70052e-07	0.00022795
				RER: market for hydrogen, liquid ecoinvent 3.5			0.000130004	0.000130478	9.78979e-08	0.000100388	2.53007e-06	5.66318e-07	2.31249e-08	2.73598e-06	5.67527e-05	9.17004e-06	9.17497e-07	7.64817e-07	2.66525e-09	9.44532e-08	2.07189e-07	1.93567e-07	3.58533e-11	2.79582e-07	9.62124e-05
			RER: preparation of nitrogen trifluoride, at plant <Mfg>				0.00784386	0.00788067	1.05036e-05	0.003666	0.000127466	6.39879e-05	3.38717e-06	0.000233519	0.00694056	0.00182073	0.000369698	8.74818e-05	3.55623e-07	1.46702e-05	1.32634e-05	1.31302e-05	3.24386e-09	3.22837e-05	0.0125124
				DE: Tap water from groundwater ts			8.31919e-07	8.94067e-07	3.66694e-10	2.59876e-07	9.01914e-06	1.7659e-09	1.03886e-10	8.6312e-09	4.34939e-07	3.90917e-09	2.15066e-08	2.52943e-09	2.09645e-10	1.91017e-07	1.11465e-09	1.10414e-09	6.21717e-13	9.30417e-10	2.3297e-07
				EU-28: Electricity grid mix 1kV-60kV ts			0.00418083	0.0041599	1.87481e-06	0.00168209	3.72274e-05	3.07686e-07	1.11591e-08	1.61649e-06	9.65215e-05	0.000266627	0.000241975	9.78955e-07	9.62179e-08	5.43546e-06	4.80993e-06	4.77904e-06	1.33359e-09	5.98154e-06	0.00122842
				GLO: market for chemical factory, organics ecoinvent 3.5			1.47636e-05	1.3693e-05	4.9737e-08	4.95911e-06	1.43e-07	9.07307e-07	2.63213e-08	3.08366e-06	0.00019275	1.59914e-06	1.63674e-06	1.3315e-06	1.61624e-09	5.56453e-07	4.54613e-08	4.44727e-08	8.04356e-12	1.12857e-07	0.000405977
				GLO: market group for transport, freight, lorry, unspecified ecoinvent 3.5			6.40219e-06	6.40189e-06	9.23228e-09	2.32631e-06	1.87908e-08	3.82017e-08	5.3341e-10	1.35108e-07	5.08342e-06	1.20557e-07	3.41529e-07	1.52833e-07	6.29257e-11	1.26126e-08	3.481e-08	3.41302e-08	2.81657e-12	2.12218e-08	0.000149428
				RENAMER | water (tap water) -> water, cooling, unspecified natural origin <u-so>			0	0	0	0	-6.00428e-06	0	0	0	0	0	0	0	0	0	0	0	0	0	0
				RENAMER | water (tap water) -> water, unspecified natural origin <u-so>			0	0	0	0	-3.00214e-06	0	0	0	0	0	0	0	0	0	0	0	0	0	0
				RER: market for ammonia, liquid ecoinvent 3.5			0.000129472	0.000129322	1.37625e-07	5.85965e-05	3.65179e-06	3.80473e-07	1.17645e-08	1.43588e-06	6.86868e-05	2.92595e-06	6.9464e-07	1.11594e-06	2.80582e-09	2.45623e-07	1.53696e-07	1.48773e-07	5.18959e-11	3.45645e-07	0.000671443
				RER: market for fluorine, liquid ecoinvent 3.5			0.00349476	0.00355356	8.36834e-06	0.00191159	7.99752e-05	5.97218e-05	3.31294e-06	0.000216396	0.00634712	0.00154707	0.000124246	8.06659e-05	2.43655e-07	8.12457e-06	8.10517e-06	8.01108e-06	1.83753e-09	2.54919e-05	0.0100078
				RER: market group for heat, district or industrial, natural gas ecoinvent 3.5			9.92436e-07	9.92595e-07	1.86379e-10	3.96412e-07	3.86842e-10	6.34914e-10	1.43543e-11	3.42804e-09	4.08398e-08	4.92665e-09	6.32452e-10	2.53698e-09	1.16144e-12	2.7784e-10	7.08245e-10	6.82312e-10	2.51843e-13	5.51666e-10	7.83803e-08
				RER: market group for transport, freight train ecoinvent 3.5			1.36941e-05	1.37302e-05	2.90753e-08	5.25645e-06	1.13317e-07	1.20041e-07	6.13444e-09	1.25484e-06	1.45192e-05	2.2658e-06	7.398e-07	1.77953e-07	4.46208e-10	8.37518e-08	1.06585e-07	1.05113e-07	6.46557e-12	7.29162e-08	3.98227e-05
				RER: preparation of nitrogen trifluoride, at plant <u-so>			0	0	3.03817e-08	0	9.00642e-06	0	0	0	0	0	0	0	0	0	0	0	0	2.48117e-07	0
				RoW: treatment of wastewater from wafer fabrication, capacity 1.1E10l/year ecoinvent 3.5			2.11841e-06	2.18531e-06	3.81095e-09	5.23597e-07	-2.68306e-06	2.51002e-06	1.81997e-08	9.58462e-06	0.000215402	1.06322e-07	4.23657e-08	3.0536e-06	1.0608e-08	2.04751e-08	5.95418e-09	5.84708e-09	2.64977e-12	7.9977e-09	9.1679e-06
			RER: preparation of silane (silicon tetrahydride) <Mfg>				0.0776303	0.0786183	8.69211e-05	0.0328418	0.00114386	0.000402751	3.40093e-05	0.0022385	0.0486092	0.0153283	0.00284489	0.000576707	2.95559e-06	5.76376e-05	0.00012442	0.00012176	2.99956e-08	0.000228556	0.0483944
				DE: market for silicon tetrachloride ecoinvent 3.5			0.00151975	0.00159582	1.56816e-06	0.00057649	0.00034485	1.49902e-05	1.71781e-06	8.97923e-05	0.0019472	0.000268146	4.46429e-05	1.94761e-05	1.17361e-07	8.38498e-07	1.98235e-06	1.94434e-06	9.62722e-10	6.32945e-06	0.00075483
				EU-28: Electricity grid mix 1kV-60kV ts			0.0110967	0.0110412	4.97613e-06	0.0044646	9.88088e-05	8.16659e-07	2.96185e-08	4.29048e-06	0.000256187	0.000707682	0.000642248	2.59834e-06	2.55381e-07	1.44268e-05	1.27665e-05	1.26845e-05	3.5396e-09	1.58762e-05	0.00326047
				GLO: market for silicone factory ecoinvent 3.5			1.5819e-05	1.42746e-05	3.46971e-08	4.55372e-06	1.43462e-07	3.51591e-07	8.16937e-09	2.20795e-06	4.53306e-05	7.89785e-07	4.7803e-06	5.19184e-07	1.21069e-09	3.12508e-07	5.64108e-08	5.46473e-08	5.65919e-12	9.32371e-08	0.000123832
				GLO: market group for transport, freight, lorry, unspecified ecoinvent 3.5			0.000117959	0.000117953	1.70102e-07	4.28617e-05	3.46217e-07	7.03856e-07	9.82795e-09	2.48932e-06	9.36607e-05	2.22123e-06	6.29258e-06	2.81591e-06	1.15939e-09	2.32384e-07	6.41366e-07	6.28839e-07	5.18945e-11	3.91006e-07	0.00275316
				RER: market for hydrogen, liquid ecoinvent 3.5			0.000215283	0.000216068	1.62116e-07	0.00016624	4.18971e-06	9.37805e-07	3.82942e-08	4.5307e-06	9.39807e-05	1.51853e-05	1.51935e-06	1.26651e-06	4.41357e-09	1.56411e-07	3.43097e-07	3.20541e-07	5.9372e-11	4.62979e-07	0.000159325
				RER: market for lime, hydrated, packed ecoinvent 3.5			0.000503114	0.000506062	1.42679e-07	5.0699e-05	6.99107e-07	3.36572e-07	7.17363e-09	1.10193e-06	2.85041e-05	9.33842e-06	8.43999e-06	6.2937e-07	1.10106e-09	7.60992e-08	3.17236e-07	3.08806e-07	5.08342e-11	4.02951e-07	0.000227348
				RER: market for nitrogen, liquid ecoinvent 3.5			0.00176914	0.0018098	3.03335e-06	0.000946245	8.74134e-05	2.89128e-05	1.80037e-06	0.00010835	0.00243759	0.000916817	6.23364e-05	3.70827e-05	1.33681e-07	1.29969e-06	3.53385e-06	3.50175e-06	9.65901e-10	9.13628e-06	0.00207272
				RER: market group for heat, district or industrial, natural gas ecoinvent 3.5			0.0115856	0.0115875	2.17578e-06	0.00462768	4.51596e-06	7.41193e-06	1.67571e-07	4.00186e-05	0.00047676	5.75133e-05	7.38319e-06	2.96165e-05	1.35585e-08	3.24348e-06	8.26799e-06	7.96525e-06	2.93999e-09	6.44011e-06	0.000915004
				RER: market group for transport, freight train ecoinvent 3.5			0.000252204	0.000252868	5.35478e-07	9.68077e-05	2.08696e-06	2.21079e-06	1.12978e-07	2.31103e-05	0.000267399	4.17292e-05	1.36249e-05	3.27735e-06	8.21778e-09	1.54245e-06	1.96297e-06	1.93587e-06	1.19076e-10	1.34289e-06	0.000733412
				RER: preparation of silane (silicon tetrahydride) <u-so>			0	0	0	0	0	1.70885e-07	2.15175e-09	2.1186e-08	1.88343e-05	0	0	2.05556e-07	9.76512e-08	0	0	0	0	0	4.10385e-23
				RER: silicon production, solar grade, modified Siemens process ecoinvent 3.5			0.0505547	0.0514768	7.41226e-05	0.0218656	0.000600811	0.000345908	3.01153e-05	0.00196258	0.0429438	0.0133089	0.00205362	0.000479219	2.32186e-06	3.55093e-05	9.45482e-05	9.24155e-05	2.13006e-08	0.000188081	0.0373943
			DE: Argon (liquid) ts				0.000858192	0.00085345	2.49169e-07	0.000248499	3.38555e-06	5.37239e-08	3.52383e-09	2.66659e-07	2.00163e-05	1.38339e-05	6.65374e-05	1.8094e-07	2.65366e-08	1.58954e-06	8.98746e-07	8.94215e-07	4.21338e-10	7.97036e-07	0.000279589
			DE: Electricity grid mix 1kV-60kV ts				2.40344	2.39012	0.000697769	0.69594	0.0092421	0.000150225	9.85545e-06	0.000745679	0.0559981	0.0387451	0.186353	0.000506405	7.42919e-05	0.00444597	0.00251679	0.0025041	1.17998e-06	0.00223203	0.783009
			DE: Tap water from groundwater ts				0.0720058	0.077385	3.17388e-05	0.0224933	0.780642	0.000152846	8.99174e-06	0.000747065	0.0376457	0.000338354	0.00186148	0.000218932	1.81456e-05	0.0165333	9.64775e-05	9.55675e-05	5.38121e-08	8.05312e-05	0.0201644
			DE: Tap water from groundwater ts				-0.0540044	-0.0580388	-2.38041e-05	-0.01687	-0.585482	-0.000114634	-6.7438e-06	-0.000560299	-0.0282343	-0.000253765	-0.00139611	-0.000164199	-1.36092e-05	-0.0124	-7.23582e-05	-7.16756e-05	-4.0359e-08	-6.03984e-05	-0.0151233
			EU-28: Compressed air ts				0.0808605	0.0804566	3.63885e-05	0.032599	0.000724288	5.95556e-06	2.14596e-07	3.13064e-05	0.00186748	0.0051825	0.00465861	1.8953e-05	1.85323e-06	0.000104759	9.31578e-05	9.25589e-05	2.5712e-08	0.000116094	0.0237503
			GLO: market for diborane ecoinvent 3.5				0.0249225	0.024812	6.3577e-05	0.0103136	0.00039029	0.000282879	1.30583e-05	0.00108711	0.0411419	0.00235043	0.000440278	0.000402439	9.39815e-07	0.000192644	6.71886e-05	6.61906e-05	1.25427e-08	0.000130016	0.0818839
			NL: Nitrogen (liquid) ts				0.601804	0.597893	0.00012746	0.183791	0.00168725	2.3388e-05	1.26944e-06	0.000194315	0.00816448	0.00590122	0.0211424	8.30447e-05	1.10979e-05	0.000506311	0.000499184	0.000495074	1.33518e-07	0.00038402	0.105763
			RER: market for hydrogen, liquid ecoinvent 3.5				0.00218862	0.00219661	1.64811e-06	0.00169004	4.25937e-05	9.53398e-06	3.89309e-07	4.60603e-05	0.000955433	0.000154378	1.54461e-05	1.28757e-05	4.48696e-08	1.59012e-06	3.48802e-06	3.25871e-06	6.03592e-10	4.70677e-06	0.00161974
		DE: B.03 - sputter FS: ITO (indium-tin-oxide) -rev4- (001) <Mfg>					0.476417	0.474047	0.000151742	0.138769	0.0336552	0.000182881	7.43016e-06	0.000500387	0.0611634	0.00824933	0.0364268	0.000490015	1.54951e-05	0.00186924	0.000513876	0.000510705	2.34416e-07	0.000476082	0.41358
			DE: Argon (liquid) ts				0.000304	0.00030232	8.8264e-08	8.80267e-05	1.19928e-06	1.90308e-08	1.24826e-09	9.44595e-08	7.09043e-06	4.90041e-06	2.35697e-05	6.40949e-08	9.40015e-09	5.63067e-07	3.18366e-07	3.16761e-07	1.49252e-10	2.82336e-07	9.90396e-05
			DE: Electricity grid mix 1kV-60kV ts				0.444284	0.441821	0.000128985	0.128647	0.00170843	2.77696e-05	1.82181e-06	0.000137841	0.0103514	0.00716215	0.0344481	9.36106e-05	1.37331e-05	0.000821851	0.000465237	0.000462892	2.18124e-07	0.000412598	0.144742
			DE: Nitrogen (liquid) ts				0.0196235	0.0195153	5.6978e-06	0.00568223	7.87256e-05	1.22973e-06	8.06491e-08	6.1036e-06	0.000458018	0.000316314	0.00152139	4.1392e-06	6.06932e-07	3.63775e-05	2.0552e-05	2.04484e-05	9.63439e-09	1.82258e-05	0.00639311
			DE: Oxygen (liquid) ts				3.11808e-06	3.10084e-06	9.05308e-10	9.02875e-07	1.23011e-08	1.95196e-10	1.28032e-11	9.68856e-10	7.27253e-08	5.02627e-08	2.41751e-07	6.5741e-10	9.64157e-11	5.77529e-09	3.26542e-09	3.24896e-09	1.53085e-12	2.89587e-09	1.01583e-06
			DE: Tap water from groundwater ts				0.0117219	0.0125976	5.16678e-06	0.0036617	0.127081	2.48818e-05	1.46377e-06	0.000121615	0.00612837	5.50808e-05	0.000303032	3.56402e-05	2.95394e-06	0.00269147	1.57056e-05	1.55575e-05	8.7601e-09	1.31097e-05	0.00328258
			DE: Tap water from groundwater ts				-0.00879141	-0.00944817	-3.87509e-06	-0.00274627	-0.095311	-1.86614e-05	-1.09783e-06	-9.12114e-05	-0.00459628	-4.13106e-05	-0.000227274	-2.67301e-05	-2.21545e-06	-0.0020186	-1.17792e-05	-1.16681e-05	-6.57008e-09	-9.8323e-06	-0.00246194
			EU-28: Compressed air ts				0.00449225	0.00446981	2.02158e-06	0.00181106	4.02382e-05	3.30864e-07	1.1922e-08	1.73924e-06	0.000103749	0.000287917	0.000258812	1.05295e-06	1.02957e-07	5.81994e-06	5.17543e-06	5.14216e-06	1.42844e-09	6.44967e-06	0.00131946
			RER: market for indium tin oxide powder, nanoscale, for sputtering target ecoinvent 3.5				0.00477952	0.00478557	1.36573e-05	0.00162497	5.62156e-05	0.000147311	5.14857e-06	0.000324203	0.0487109	0.000464218	9.90155e-05	0.000382238	3.04145e-07	0.000331755	1.86632e-05	1.80131e-05	2.88806e-09	3.52456e-05	0.260205
		DE: B.04 - sputter RS: ITO (indium-tin-oxide) -rev4- (001) <Mfg>					4.58753	4.5648	0.00146614	1.33655	0.335843	0.00181774	7.35756e-05	0.00494892	0.607511	0.079646	0.350574	0.00486289	0.000149488	0.0183649	0.00495376	0.00492298	2.25743e-06	0.00459676	4.07826
			DE: Argon (liquid) ts				0.00304	0.0030232	8.8264e-07	0.000880267	1.19928e-05	1.90308e-07	1.24826e-08	9.44595e-07	7.09043e-05	4.90041e-05	0.000235697	6.40949e-07	9.40015e-08	5.63067e-06	3.18366e-06	3.16761e-06	1.49252e-09	2.82336e-06	0.000990396
			DE: Electricity grid mix 1kV-60kV ts				4.44284	4.41821	0.00128985	1.28647	0.0170843	0.000277696	1.82181e-05	0.00137841	0.103514	0.0716215	0.344481	0.000936106	0.000137331	0.00821851	0.00465237	0.00462892	2.18124e-06	0.00412598	1.44742
			DE: Nitrogen (liquid) ts				0.0196235	0.0195153	5.6978e-06	0.00568223	7.87256e-05	1.22973e-06	8.06491e-08	6.1036e-06	0.000458018	0.000316314	0.00152139	4.1392e-06	6.06932e-07	3.63775e-05	2.0552e-05	2.04484e-05	9.63439e-09	1.82258e-05	0.00639311
			DE: Oxygen (liquid) ts				3.11808e-06	3.10084e-06	9.05308e-10	9.02875e-07	1.23011e-08	1.95196e-10	1.28032e-11	9.68856e-10	7.27253e-08	5.02627e-08	2.41751e-07	6.5741e-10	9.64157e-11	5.77529e-09	3.26542e-09	3.24896e-09	1.53085e-12	2.89587e-09	1.01583e-06
			DE: Tap water from groundwater ts				0.117219	0.125976	5.16678e-05	0.036617	1.27081	0.000248818	1.46377e-05	0.00121615	0.0612837	0.000550808	0.00303032	0.000356402	2.95394e-05	0.0269147	0.000157056	0.000155575	8.7601e-08	0.000131097	0.0328258
			DE: Tap water from groundwater ts				-0.0879141	-0.0944817	-3.87509e-05	-0.0274627	-0.95311	-0.000186614	-1.09783e-05	-0.000912114	-0.0459628	-0.000413106	-0.00227274	-0.000267301	-2.21545e-05	-0.020186	-0.000117792	-0.000116681	-6.57008e-08	-9.8323e-05	-0.0246194
			EU-28: Compressed air ts				0.0449225	0.0446981	2.02158e-05	0.0181106	0.000402382	3.30864e-06	1.1922e-07	1.73924e-05	0.00103749	0.00287917	0.00258812	1.05295e-05	1.02957e-06	5.81994e-05	5.17543e-05	5.14216e-05	1.42844e-08	6.44967e-05	0.0131946
			RER: market for indium tin oxide powder, nanoscale, for sputtering target ecoinvent 3.5				0.0477952	0.0478557	0.000136573	0.0162497	0.000562156	0.00147311	5.14857e-05	0.00324203	0.487109	0.00464218	0.000990155	0.00382238	3.04145e-06	0.00331755	0.000186632	0.000180131	2.88806e-08	0.000352456	2.60205
		DE: B.05 - Spiro-MeOTAD [PTAA proxy] deposition (FS) -rev5- (001) <Mfg>					12.0667	12.0478	0.0355576	3.47154	0.064322	0.0836722	0.00367797	0.286244	8.75452	0.298868	0.119709	0.108949	0.000310424	0.239756	0.022382	0.0207775	1.18738e-05	0.0523686	8.82104
			GLO: preparation of Spiro-OMeTAD -rev5- (001) <Mfg>				11.9959	11.9773	0.0355361	3.45043	0.061045	0.0836671	0.00367765	0.286219	8.75274	0.297479	0.114337	0.108933	0.000308216	0.239565	0.0223072	0.0207031	1.18398e-05	0.0523001	8.79815
				GLO: preparation of 2,2`, 7,7`-Tetrabromo-9-9`-spirobi [9H-fluorene] <Mfg>			5.64057	5.60117	0.0234963	2.04872	0.014512	0.0557963	0.00211703	0.191307	5.06466	0.104057	0.0726706	0.0705349	0.000142804	0.196209	0.0151133	0.0139211	1.02292e-06	0.0137212	3.37862
					GLO: preparation of 4-Bromobiphenyl <Mfg>		0.000593224	0.000592289	9.8931e-07	0.000300061	1.07983e-05	4.7353e-06	2.20278e-07	1.92311e-05	0.000651156	4.56666e-05	9.10726e-06	7.07306e-06	1.7846e-08	1.2702e-06	1.26967e-06	1.20834e-06	2.93886e-10	2.23423e-06	0.0019167
						GLO: preparation of biphenyl <Mfg>	4.04936e-05	4.02841e-05	7.54937e-08	3.45986e-05	5.7461e-07	1.79281e-07	1.64649e-08	1.42993e-06	2.28876e-05	7.69571e-07	4.53447e-07	2.43105e-07	1.15533e-09	1.16057e-08	1.19573e-07	1.02792e-07	4.55439e-12	1.36455e-07	1.65868e-05
						GLO: preparation of biphenyl <Mfg>	3.93e-05	3.90627e-05	7.34465e-08	3.39584e-05	5.17059e-07	1.59658e-07	1.52409e-08	1.35659e-06	2.12368e-05	1.45865e-07	4.11618e-07	2.18072e-07	1.06441e-09	1.07483e-08	1.1724e-07	1.0048e-07	3.90172e-12	1.30278e-07	1.53688e-05
						GLO: preparation of biphenyl <Mfg>	1.19299e-06	1.22067e-06	2.046e-09	6.40078e-07	5.94884e-08	1.96111e-08	1.22387e-09	7.32544e-08	1.64971e-06	6.23686e-07	4.18094e-08	2.50157e-08	9.08485e-11	8.4382e-10	2.33117e-09	2.3106e-09	6.52484e-13	6.17496e-09	1.21331e-06
						GLO: preparation of biphenyl <Mfg>	6.4533e-10	6.97222e-10	1.14815e-12	1.76093e-10	-1.93768e-09	1.22838e-11	2.10559e-13	8.96655e-11	1.13243e-09	1.97769e-11	1.99297e-11	1.79622e-11	6.45677e-14	1.35915e-11	1.79365e-12	1.73152e-12	1.82933e-16	1.91715e-12	4.70688e-09
						GLO: market for acetic acid, without water, in 98% solution state ecoinvent 3.5	0.000197196	0.000196766	3.5836e-07	0.000131502	5.17707e-06	1.85662e-06	7.71846e-08	7.00073e-06	0.000246903	1.50401e-05	3.23402e-06	2.65891e-06	5.59499e-09	5.30451e-07	4.93277e-07	4.62246e-07	1.01137e-10	7.47708e-07	0.000522135
						GLO: market for bromine ecoinvent 3.5	0.000224446	0.000224184	2.50593e-07	7.48103e-05	9.67254e-07	8.9441e-07	4.44323e-08	3.91266e-06	0.000132006	7.12402e-06	1.92714e-06	1.59044e-06	3.68856e-09	2.20171e-07	3.24454e-07	3.17815e-07	7.06868e-11	6.38815e-07	0.000806019
						RER: market for trifluoroacetic acid ecoinvent 3.5	0.000131088	0.000131054	3.04863e-07	5.91505e-05	4.07941e-06	1.80499e-06	8.21963e-08	6.88776e-06	0.000249359	2.2733e-05	3.49266e-06	2.58061e-06	7.40707e-09	5.07972e-07	3.32368e-07	3.2549e-07	1.17508e-10	7.11251e-07	0.000571959
					GLO: preparation of 9-Fluorenone <Mfg>		0.00203153	0.00202831	2.56433e-06	0.00101357	2.56754e-05	1.94011e-05	7.04145e-07	8.03608e-05	0.00288834	0.000152632	3.51265e-05	2.82848e-05	5.81488e-08	6.94477e-06	3.63293e-06	3.45875e-06	6.71687e-10	6.02514e-06	0.00695552
						EU-28: Electricity grid mix 1kV-60kV ts	2.58568e-06	2.57274e-06	1.1595e-09	1.04031e-06	2.30237e-08	1.90292e-10	6.90148e-12	9.99735e-10	5.96948e-08	1.64899e-07	1.49652e-07	6.05446e-10	5.9507e-11	3.36162e-09	2.97476e-09	2.95565e-09	8.24772e-13	3.69935e-09	7.5973e-07
						RER: market for polycarboxylates, 40% active substance ecoinvent 3.5	0.00202108	0.00201798	2.432e-06	0.0010018	2.39605e-05	1.9148e-05	6.98698e-07	7.97162e-05	0.00284389	0.000151655	3.45696e-05	2.78076e-05	5.76636e-08	6.83998e-06	3.57072e-06	3.39791e-06	6.65685e-10	5.5842e-06	0.00673853
						RER: market for sulfuric acid ecoinvent 3.5	7.85804e-06	7.75093e-06	1.31171e-07	1.07294e-05	1.69182e-06	2.52892e-07	5.44054e-09	6.43531e-07	4.43892e-05	8.12531e-07	4.07221e-07	4.76536e-07	4.25671e-10	1.01426e-07	5.92345e-08	5.78765e-08	5.17734e-12	4.37243e-07	0.000216222
					EU-28: Electricity grid mix 1kV-60kV ts		0.0156309	0.0155527	7.00941e-06	0.00628886	0.000139183	1.15035e-06	4.17208e-08	6.0436e-06	0.000360867	0.000996845	0.000904675	3.66004e-06	3.59732e-07	2.03217e-05	1.7983e-05	1.78675e-05	4.98591e-09	2.23633e-05	0.00459272
					GLO: market for acetic acid, without water, in 98% solution state ecoinvent 3.5		0.00171275	0.00170902	3.11255e-06	0.00114216	4.49656e-05	1.61257e-05	6.70389e-07	6.0805e-05	0.00214448	0.000130631	2.80891e-05	2.3094e-05	4.85955e-08	4.60724e-06	4.28437e-06	4.01485e-06	8.7843e-10	6.49424e-06	0.00453502
					GLO: market for bromine ecoinvent 3.5		0.00263524	0.00263217	2.94223e-06	0.000878352	1.13566e-05	1.05013e-05	5.21682e-07	4.59388e-05	0.00154989	8.36436e-05	2.26267e-05	1.86734e-05	4.33077e-08	2.58504e-06	3.80944e-06	3.73149e-06	8.29938e-10	7.50037e-06	0.00946353
					GLO: market for iron (III) chloride, without water, in 40% solution state ecoinvent 3.5		5.00445e-06	4.91268e-06	1.27397e-08	1.71964e-06	1.01297e-07	1.00409e-07	3.76023e-09	3.81061e-07	1.75961e-05	4.28635e-07	1.81386e-07	1.4487e-07	3.14788e-10	4.49868e-08	1.40392e-08	1.38609e-08	4.58149e-12	2.31322e-08	3.80452e-05
					GLO: market for magnesium ecoinvent 3.5		5.53071	5.49143	0.0234004	1.97121	0.0134142	0.0553395	0.00207799	0.189088	4.99493	0.101167	0.0703353	0.0698175	0.00014108	0.196001	0.0148533	0.0136905	9.86577e-07	0.0134511	3.16657
					GLO: market for water, ultrapure ecoinvent 3.5		0.00338323	0.00338045	5.92288e-06	0.00117716	8.8066e-05	2.22217e-05	2.79983e-06	0.000149796	0.00272916	0.000109345	0.000166587	6.4094e-05	3.74689e-07	1.14009e-05	2.27547e-05	2.23858e-05	1.55323e-09	1.34535e-05	0.0517404
					RER: market for ammonia, liquid ecoinvent 3.5		0.00243353	0.00243071	2.58677e-06	0.00110137	6.86383e-05	7.15129e-06	2.21123e-07	2.69885e-05	0.00129102	5.49956e-05	1.30563e-05	2.09749e-05	5.27376e-08	4.61668e-06	2.88884e-06	2.7963e-06	9.75424e-10	6.49667e-06	0.0126203
					RER: market for dichloromethane ecoinvent 3.5		0.00110243	0.00110278	1.99028e-06	0.000284944	3.18435e-06	4.00855e-06	2.0672e-08	3.6477e-05	0.000156108	2.1509e-07	2.00294e-07	5.50672e-06	6.84574e-10	1.54351e-08	4.39131e-06	4.33892e-06	1.9373e-08	5.47243e-06	0.000317593
					RER: market for diethyl ether, without water, in 99.95% solution state ecoinvent 3.5		0.0803332	0.0803045	6.87367e-05	0.0653192	0.000705789	0.000371382	3.38371e-05	0.00179291	0.0579387	0.00131501	0.00115566	0.000545932	7.67637e-07	0.000156931	0.00019893	0.000170842	6.77462e-09	0.000200007	0.119865
					RER: market for hydrochloric acid, without water, in 30% solution state ecoinvent 3.5		3.38223e-07	3.3964e-07	7.92968e-10	1.69701e-07	1.24447e-08	6.42702e-09	2.94858e-10	2.37458e-08	9.30979e-07	1.03223e-07	1.48109e-08	9.11733e-09	2.86675e-11	1.96575e-09	8.28365e-10	8.14776e-10	3.83619e-13	2.23445e-09	1.99061e-06
				GLO: preparation of 3,4'-dimethoxydiphenylamine <Mfg>			5.94957	5.96824	0.0114531	1.15281	0.0353671	0.0247031	0.00135658	0.0815626	3.34319	0.135157	0.0333714	0.0340769	0.000151626	0.0402105	0.00627168	0.00591403	1.06869e-05	0.0371323	4.77733
					GLO: preparation dibenzylideneacetone (C17H14O) <Mfg>		0.00215199	0.00215156	2.53986e-06	0.00142792	3.2286e-05	1.35653e-05	9.67448e-07	6.28714e-05	0.0019278	0.000100814	4.40034e-05	2.15223e-05	5.89124e-08	4.81903e-06	6.02812e-06	5.49911e-06	6.36081e-10	6.43876e-06	0.00702892
						EU-28: Electricity grid mix 1kV-60kV ts	1.96482e-07	1.95499e-07	8.81089e-11	7.90516e-08	1.74954e-09	1.446e-11	5.24435e-13	7.59686e-11	4.53613e-09	1.25304e-08	1.13719e-08	4.6007e-11	4.52186e-12	2.55445e-10	2.26048e-10	2.24596e-10	6.26734e-14	2.81109e-10	5.77309e-08
						GLO: market for ethyl acetate ecoinvent 3.5	0.00016554	0.000165658	2.5527e-07	9.99186e-05	2.70935e-06	1.28055e-06	6.1303e-08	5.07226e-06	0.000189364	7.01487e-06	3.43636e-06	1.81363e-06	3.5108e-09	4.28466e-07	4.28363e-07	3.9357e-07	5.73591e-11	6.0989e-07	0.000441603
						GLO: market for sodium hydroxide, without water, in 50% solution state ecoinvent 3.5	0.000208687	0.000207904	4.82853e-07	7.48307e-05	5.28745e-06	2.47065e-06	1.20935e-07	1.03474e-05	0.000315016	2.38827e-05	4.18241e-06	3.42786e-06	1.21336e-08	5.67139e-07	5.325e-07	5.27151e-07	2.24195e-10	8.31989e-07	0.000641918
						GLO: market for solvent, organic ecoinvent 3.5	2.54774e-07	2.54469e-07	6.00794e-10	3.70943e-07	4.83215e-09	2.10022e-09	6.86051e-11	8.48411e-09	3.22427e-07	1.58319e-08	6.12863e-09	3.6047e-09	8.46208e-12	9.76239e-10	1.03611e-09	9.12476e-10	3.47785e-13	1.66651e-09	8.49735e-07
						GLO: market for water, ultrapure ecoinvent 3.5	0.000181786	0.000181636	3.18244e-07	6.32504e-05	4.7319e-06	1.194e-06	1.50438e-07	8.04875e-06	0.000146641	5.87526e-06	8.95092e-06	3.44386e-06	2.01326e-08	6.12588e-07	1.22264e-06	1.20282e-06	8.34569e-11	7.22875e-07	0.00278008
						RER: market for acetone, liquid ecoinvent 3.5	5.36686e-05	5.37345e-05	6.01117e-08	3.34477e-05	6.54693e-07	1.60589e-07	6.53202e-09	9.59464e-07	1.48874e-05	9.91781e-07	2.02872e-07	2.31349e-07	3.46149e-10	2.89151e-08	1.41687e-07	1.25392e-07	2.70722e-12	1.82554e-07	4.5712e-05
						RER: market for benzaldehyde ecoinvent 3.5	0.000338197	0.000338929	3.78232e-07	0.00018724	8.4387e-06	2.86044e-06	1.27929e-07	1.14602e-05	0.000391748	4.29473e-05	9.03547e-06	4.0802e-06	1.12233e-08	8.19923e-07	6.45499e-07	6.0836e-07	1.57971e-10	1.06884e-06	0.000895454
						RER: market for ethanol, without water, in 99.7% solution state, from ethylene ecoinvent 3.5	0.00120366	0.00120325	1.04446e-06	0.000968779	1.04573e-05	5.597e-06	5.00241e-07	2.69747e-05	0.00086982	2.0074e-05	1.81779e-05	8.52178e-06	1.1553e-08	2.36077e-06	3.05617e-06	2.64068e-06	1.09982e-10	3.02065e-06	0.00222324
					GLO: preparation of 4-bromoaniline <Mfg>		0.322868	0.322193	0.00046032	0.131571	0.00321615	0.00202799	8.53449e-05	0.00814734	0.279706	0.0139322	0.00354355	0.00288764	1.58109e-05	0.000708965	0.000634399	0.000600525	2.29403e-06	0.00125064	0.992134
						GLO: market for bromine ecoinvent 3.5	0.151301	0.151124	0.000168927	0.0504301	0.000652033	0.000602928	2.99521e-05	0.00263755	0.0889863	0.00480235	0.0012991	0.00107213	2.48649e-06	0.000148419	0.000218717	0.000214242	4.76505e-08	0.00043063	0.543343
						RER: market for aniline ecoinvent 3.5	0.171567	0.171069	0.000291394	0.0811406	0.00256412	0.00142506	5.53928e-05	0.00550979	0.19072	0.00912985	0.00224445	0.00181551	1.33245e-05	0.000560547	0.000415682	0.000386283	2.24638e-06	0.000820008	0.44879
					GLO: preparation of palladium chloride PdCl2 <Mfg>		0.0900269	0.089494	0.00803728	0.0354678	0.000872307	0.0114201	0.000201137	0.0122117	1.69286	0.00607553	0.00183225	0.0153438	8.14022e-06	0.0337241	0.00032957	0.000326517	1.34903e-07	0.0275289	0.644166
						GLO: preparation of Aqua regia <Mfg>	1.3354e-05	1.33634e-05	1.84e-08	3.27244e-06	2.29122e-07	1.20115e-07	4.9768e-09	4.11169e-07	1.83847e-05	1.58517e-06	2.46203e-07	1.76964e-07	5.84925e-10	6.16714e-08	2.73395e-08	2.70682e-08	2.50978e-10	6.12256e-08	4.20639e-05
						GLO: preparation of Aqua regia <Mfg>	4.95591e-06	4.97666e-06	1.16192e-08	2.4866e-06	1.82349e-07	9.41737e-08	4.32049e-09	3.47942e-07	1.36414e-05	1.51251e-06	2.17021e-07	1.33594e-07	4.20058e-10	2.88036e-08	1.21378e-08	1.19387e-08	5.62109e-12	3.27409e-08	2.91679e-05
						GLO: preparation of Aqua regia <Mfg>	8.3981e-06	8.38674e-06	6.7808e-09	7.85844e-07	4.67726e-08	2.59409e-08	6.56309e-10	6.32275e-08	4.7433e-06	7.26591e-08	2.9182e-08	4.33703e-08	1.64867e-10	3.28677e-08	1.52017e-08	1.51294e-08	2.45357e-10	2.84847e-08	1.2896e-05
						EU-28: Electricity grid mix 1kV-60kV ts	1.56309e-05	1.55527e-05	7.00941e-09	6.28886e-06	1.39183e-07	1.15035e-09	4.17208e-11	6.0436e-09	3.60867e-07	9.96845e-07	9.04675e-07	3.66004e-09	3.59732e-10	2.03217e-08	1.7983e-08	1.78675e-08	4.98591e-12	2.23633e-08	4.59272e-06
						GLO: market for palladium ecoinvent 3.5	0.0899979	0.0894651	0.00803726	0.0354583	0.000871939	0.0114199	0.000201132	0.0122113	1.69284	0.00607294	0.0018311	0.0153436	8.13928e-06	0.033724	0.000329525	0.000326472	1.34648e-07	0.0275289	0.64412
					GLO: preparation of sodium acetate <Mfg>		0.000209552	0.000208982	4.16596e-07	0.000117523	5.45882e-06	2.14766e-06	9.55767e-08	8.45664e-06	0.000280923	1.87339e-05	3.69908e-06	3.03759e-06	8.09106e-09	5.65757e-07	5.27803e-07	5.04321e-07	1.47933e-10	8.08617e-07	0.000585699
						GLO: market for acetic acid, without water, in 98% solution state ecoinvent 3.5	0.000137479	0.00013718	2.49839e-07	9.16791e-05	3.60931e-06	1.29438e-06	5.38109e-08	4.88071e-06	0.000172134	1.04855e-05	2.25466e-06	1.85372e-06	3.90067e-09	3.69815e-07	3.43899e-07	3.22264e-07	7.051e-11	5.21281e-07	0.000364018
						GLO: market for sodium hydroxide, without water, in 50% solution state ecoinvent 3.5	7.2059e-05	7.17886e-05	1.66728e-07	2.58388e-05	1.82574e-06	8.53109e-07	4.17586e-08	3.57294e-06	0.000108774	8.24663e-06	1.44417e-06	1.18363e-06	4.1897e-09	1.95831e-07	1.83871e-07	1.82024e-07	7.74138e-11	2.87283e-07	0.000221652
						GLO: market group for tap water ecoinvent 3.5	1.33039e-08	1.33142e-08	2.93004e-11	4.97633e-09	2.37685e-08	1.75223e-10	7.2283e-12	2.99314e-09	1.45717e-08	1.81444e-09	2.40679e-10	2.41202e-10	6.94901e-13	1.10865e-10	3.34429e-11	3.27577e-11	8.73913e-15	5.2384e-11	2.89398e-08
					GLO: preparation of sodium tert-butoxide <Mfg>		0.118619	0.118833	0.000186957	0.0702876	0.00398064	0.000815421	3.77395e-05	0.00362989	0.110316	0.00736522	0.00222577	0.00117141	3.42837e-06	0.000203893	0.000283722	0.000264931	3.62476e-08	0.000428939	0.232817
						GLO: market for 1-butanol ecoinvent 3.5	0.0984995	0.0987736	0.000148336	0.0632233	0.00373501	0.000597959	2.77566e-05	0.00272968	0.0788507	0.00540916	0.00179633	0.000851468	2.02855e-06	0.000139587	0.000235885	0.000217731	2.88141e-08	0.000351417	0.146173
						GLO: market for sodium ecoinvent 3.5	0.0201198	0.0200589	3.86215e-05	0.00706424	0.000245635	0.000217462	9.98296e-06	0.000900211	0.0314653	0.00195606	0.000429442	0.000319945	1.39981e-06	6.43054e-05	4.78372e-05	4.72001e-05	7.43351e-09	7.75217e-05	0.0866438
					GLO: preparation of tri-tert-butylphosphine <Mfg>		0.0144187	0.0143326	3.06252e-05	0.00638173	0.000201776	0.000131981	4.287e-05	0.000598763	0.0157372	0.00150309	0.000376406	0.000179428	1.42009e-06	0.00046837	3.37188e-05	3.31523e-05	6.33234e-09	5.85038e-05	0.0253994
						GLO: market for phosphane ecoinvent 3.5	0.00802948	0.00795682	2.04944e-05	0.00353526	8.98096e-05	8.27289e-05	4.08546e-05	0.000388797	0.00868021	0.00115595	0.000299412	0.000108757	5.29321e-07	0.00045397	2.16047e-05	2.13968e-05	3.79447e-09	3.40915e-05	0.0100917
						GLO: market for tert-butyl amine ecoinvent 3.5	0.00695146	0.00693694	1.07908e-05	0.00308566	0.000127082	5.11051e-05	2.06499e-06	0.000216359	0.00735648	0.000354324	7.99658e-05	7.51362e-05	9.02849e-07	1.54408e-05	1.28543e-05	1.24681e-05	2.7346e-09	2.60123e-05	0.0181964
						RoW: market for ammonia, liquid ecoinvent 3.5	-0.000562275	-0.000561129	-6.59902e-07	-0.000239185	-1.51152e-05	-1.85344e-06	-4.96612e-08	-6.39367e-06	-0.000299459	-7.18346e-06	-2.97217e-06	-4.46499e-06	-1.20793e-08	-1.04049e-06	-7.40245e-07	-7.12606e-07	-1.96729e-10	-1.59995e-06	-0.00288876
					EU-28: Electricity grid mix 1kV-60kV ts		0.0779283	0.0775382	3.49455e-05	0.0313532	0.000693898	5.73509e-06	2.08e-07	3.01304e-05	0.00179911	0.00496979	0.00451027	1.82472e-05	1.79345e-06	0.000101314	8.96545e-05	8.90786e-05	2.48573e-08	0.000111493	0.022897
					Europe without Switzerland: market for spent solvent mixture ecoinvent 3.5		4.11352	4.13111	0.00109605	0.156059	0.00558778	0.00358252	0.000678955	0.0248354	0.479624	0.0207306	0.00917873	0.00528566	8.73851e-05	0.00120127	0.00187344	0.00185264	1.13285e-06	0.00322273	1.09942
					Europe without Switzerland: treatment of wastewater, average, capacity 1E9l/year ecoinvent 3.5		0.000197305	0.000275491	5.33274e-07	5.85789e-05	-0.00035089	8.94542e-06	4.52198e-07	4.10108e-05	0.00124005	2.34469e-05	1.00052e-05	1.21324e-05	2.41798e-06	3.53426e-06	7.31519e-07	7.16958e-07	5.58384e-10	1.5158e-06	0.00107954
					Europe without Switzerland: water production, deionised, from tap water, at user ecoinvent 3.5		0.000685678	0.000863986	1.37241e-06	0.000316627	0.000771151	1.12713e-05	5.52508e-07	0.000121722	0.0011261	0.00022093	2.19623e-05	1.54455e-05	4.96238e-08	4.90371e-06	1.62939e-06	1.59892e-06	6.19203e-10	3.42325e-06	0.00210709
					GLO: diethyl ether production ecoinvent 3.5		0.0237926	0.0236764	6.60515e-05	0.012106	0.00073231	0.000311433	1.41654e-05	0.00113026	0.0515663	0.00197689	0.000495847	0.000456441	1.07296e-06	0.000109975	7.12839e-05	6.80128e-05	1.80617e-08	0.000173454	0.158254
					GLO: market for chemical, organic ecoinvent 3.5		0.0536932	0.0535928	7.11748e-05	0.0392999	0.00109274	0.000285221	1.21523e-05	0.0014145	0.0367054	0.00153053	0.000455305	0.000413986	1.06589e-06	7.54091e-05	0.000135121	0.000119632	1.11874e-08	0.000162277	0.0897673
					GLO: market for ethyl acetate ecoinvent 3.5		0.0912264	0.0912911	0.000140675	0.0550635	0.00149308	0.000705688	3.37831e-05	0.00279524	0.104355	0.00386578	0.00189372	0.000999459	1.93475e-06	0.000236121	0.000236064	0.00021689	3.16097e-08	0.000336101	0.24336
					GLO: market for magnesium sulfate ecoinvent 3.5		0.0273542	0.0274096	7.26443e-05	0.0102747	0.000195246	0.000251319	1.41293e-05	0.00114917	0.0229529	0.00398183	0.000529208	0.000347625	1.02295e-06	0.00229889	9.94263e-05	9.8411e-05	1.33981e-08	0.000125718	0.0542204
					GLO: market for methanol ecoinvent 3.5		0.00230054	0.00230138	2.19079e-06	0.00256612	1.39706e-05	1.25589e-05	3.98338e-07	3.91251e-05	0.00205299	3.87567e-05	1.09762e-05	1.94979e-05	2.4593e-08	5.11939e-06	4.63869e-06	4.33223e-06	1.20342e-09	5.82637e-06	0.00232045
					GLO: market group for tap water ecoinvent 3.5		0.000155212	0.000155332	3.41838e-07	5.80572e-05	0.000277299	2.04427e-06	8.43301e-08	3.492e-05	0.000170004	2.11684e-05	2.80793e-06	2.81402e-06	8.10718e-09	1.29343e-06	3.90167e-07	3.82173e-07	1.01957e-10	6.11146e-07	0.000337632
					RER: market for acetone, liquid ecoinvent 3.5		0.674298	0.675126	0.000755249	0.42024	0.00822563	0.00201766	8.2069e-05	0.0120548	0.187047	0.0124608	0.0025489	0.0029067	4.34905e-06	0.000363292	0.00178017	0.00157544	3.40138e-08	0.00229363	0.574331
					RER: market for acetone, liquid ecoinvent 3.5		-0.0239445	-0.0239739	-2.68191e-05	-0.0149228	-0.000292094	-7.16476e-05	-2.91429e-06	-0.000428068	-0.00664208	-0.000442487	-9.05119e-05	-0.000103217	-1.54436e-07	-1.29006e-05	-6.32142e-05	-5.59442e-05	-1.20784e-09	-8.14472e-05	-0.0203946
					RER: market for aniline ecoinvent 3.5		0.18988	0.189329	0.000322497	0.0898017	0.00283782	0.00157718	6.13055e-05	0.00609791	0.211077	0.0101044	0.00248402	0.0020093	1.47467e-05	0.00062038	0.000460053	0.000427516	2.48616e-06	0.000907537	0.496695
					RER: market for nitrogen, liquid ecoinvent 3.5		0.0867276	0.088721	0.000148703	0.0463874	0.00428523	0.00141738	8.82588e-05	0.00531161	0.119497	0.0449447	0.00305589	0.00181789	6.55337e-06	6.37141e-05	0.000173239	0.000171665	4.7351e-08	0.000447884	0.10161
					RER: market for toluene, liquid ecoinvent 3.5		0.0650897	0.0652065	4.038e-05	0.0547448	0.00136192	8.6411e-05	5.18713e-07	0.00065432	0.00302018	3.82462e-05	5.60856e-05	0.000132768	1.08048e-07	3.48626e-06	0.000108623	0.000100314	5.50544e-10	0.000122576	0.0274628
					RER: market for trichloromethane ecoinvent 3.5		0.0183665	0.0184059	8.98064e-06	0.00414549	0.000133365	8.8234e-05	4.30568e-06	0.00162152	0.0267707	0.00169568	0.000182489	0.000135317	3.81603e-07	2.39344e-05	1.24653e-05	1.2211e-05	4.41324e-06	2.47302e-05	0.021732
				GLO: preparation of sodium tert-butoxide <Mfg>			0.0569989	0.0571014	8.98365e-05	0.0337745	0.00191278	0.000391826	1.81346e-05	0.00174423	0.053009	0.00353913	0.00106953	0.000562887	1.6474e-06	9.79745e-05	0.000136334	0.000127304	1.74177e-08	0.000206114	0.111873
					GLO: market for 1-butanol ecoinvent 3.5		0.047331	0.0474627	7.12781e-05	0.03038	0.00179474	0.000287331	1.33376e-05	0.00131167	0.0378893	0.00259921	0.000863172	0.000409147	9.74758e-07	6.70745e-05	0.000113347	0.000104624	1.38457e-08	0.000168863	0.070239
					GLO: market for sodium ecoinvent 3.5		0.00966794	0.00963869	1.85584e-05	0.00339451	0.000118032	0.000104495	4.79701e-06	0.000432569	0.0151197	0.000939926	0.000206355	0.00015374	6.72638e-07	3.09e-05	2.29867e-05	2.26806e-05	3.57195e-09	3.72507e-05	0.041634
				GLO: preparation of tri-tert-butylphosphine <Mfg>			0.0145015	0.014415	3.08012e-05	0.00641841	0.000202936	0.000132739	4.31164e-05	0.000602204	0.0158277	0.00151173	0.000378569	0.000180459	1.42825e-06	0.000471062	3.39126e-05	3.33428e-05	6.36874e-09	5.884e-05	0.0255454
					GLO: market for phosphane ecoinvent 3.5		0.00807563	0.00800255	2.06121e-05	0.00355558	9.03257e-05	8.32044e-05	4.10894e-05	0.000391032	0.0087301	0.00116259	0.000301133	0.000109382	5.32364e-07	0.000456579	2.17289e-05	2.15198e-05	3.81628e-09	3.42874e-05	0.0101497
					GLO: market for tert-butyl amine ecoinvent 3.5		0.00699141	0.0069768	1.08528e-05	0.00310339	0.000127812	5.13988e-05	2.07686e-06	0.000217602	0.00739876	0.000356361	8.04253e-05	7.5568e-05	9.08037e-07	1.55296e-05	1.29282e-05	1.25398e-05	2.75032e-09	2.61618e-05	0.018301
					RoW: market for ammonia, liquid ecoinvent 3.5		-0.000565506	-0.000564354	-6.63694e-07	-0.000240559	-1.5202e-05	-1.86409e-06	-4.99467e-08	-6.43041e-06	-0.00030118	-7.22474e-06	-2.98925e-06	-4.49065e-06	-1.21487e-08	-1.04647e-06	-7.44499e-07	-7.16701e-07	-1.9786e-10	-1.60914e-06	-0.00290537
				EU-28: Electricity grid mix 1kV-60kV ts			0.0190639	0.0189685	8.54885e-06	0.00767006	0.000169751	1.403e-06	5.08838e-08	7.37093e-06	0.000440123	0.00121578	0.00110337	4.46388e-06	4.38738e-07	2.47848e-05	2.19325e-05	2.17916e-05	6.08095e-09	2.72749e-05	0.0056014
				Europe without Switzerland: water production, deionised, from tap water, at user ecoinvent 3.5			0.000651048	0.00082035	1.30309e-06	0.000300636	0.000732204	1.07021e-05	5.24603e-07	0.000115574	0.00106923	0.000209772	2.08531e-05	1.46654e-05	4.71176e-08	4.65605e-06	1.5471e-06	1.51816e-06	5.8793e-10	3.25035e-06	0.00200067
				GLO: market for chemical, organic ecoinvent 3.5			0.0540585	0.0539573	7.1659e-05	0.0395672	0.00110017	0.000287162	1.2235e-05	0.00142412	0.0369551	0.00154094	0.000458403	0.000416802	1.07314e-06	7.59221e-05	0.00013604	0.000120445	1.12635e-08	0.000163381	0.090378
				GLO: market for ethyl acetate ecoinvent 3.5			0.0866139	0.0866753	0.000133562	0.0522794	0.00141759	0.000670007	3.20749e-05	0.00265391	0.099079	0.00367032	0.00179797	0.000948925	1.83692e-06	0.000224182	0.000224128	0.000205924	3.00114e-08	0.000319107	0.231056
				GLO: market for magnesium sulfate ecoinvent 3.5			0.0259735	0.0260262	6.89777e-05	0.00975611	0.000185391	0.000238634	1.34162e-05	0.00109116	0.0217944	0.00378085	0.000502497	0.000330079	9.71322e-07	0.00218286	9.44079e-05	9.34439e-05	1.27218e-08	0.000119373	0.0514837
				RER: market for nitrogen, liquid ecoinvent 3.5			0.0825084	0.0844048	0.000141469	0.0441307	0.00407676	0.00134843	8.39652e-05	0.00505321	0.113683	0.0427582	0.00290723	0.00172945	6.23456e-06	6.06145e-05	0.000164811	0.000163314	4.50474e-08	0.000426095	0.0966671
				RER: market for toluene, liquid ecoinvent 3.5			0.0654011	0.0655185	4.05732e-05	0.0550067	0.00136843	8.68245e-05	5.21195e-07	0.000657451	0.00303463	3.84292e-05	5.63539e-05	0.000133404	1.08565e-07	3.50294e-06	0.000109143	0.000100794	5.53179e-10	0.000123163	0.0275942
			DE: Electricity grid mix 1kV-60kV ts				0.0627	0.0624	1.82e-05	0.0182	0.000241	3.92e-06	2.57e-07	1.95e-05	0.00146	0.00101	0.00487	1.32e-05	1.94e-06	0.000116	6.57e-05	6.54e-05	3.08e-08	5.82733e-05	0.0204426
			DE: Nitrogen (liquid) ts				0.00256	0.00254	7.42e-07	0.00074	1.03e-05	1.6e-07	1.05e-08	7.95e-07	5.96e-05	4.12e-05	0.000198	5.39e-07	7.9e-08	4.74e-06	2.68e-06	2.66e-06	1.25e-09	2.37315e-06	0.000832436
			DE: Tap water from groundwater ts				0.0011	0.00118	4.84e-07	0.000343	0.0119	2.33e-06	1.37e-07	1.14e-05	0.000575	5.16e-06	2.84e-05	3.34e-06	2.77e-07	0.000252	1.47e-06	1.46e-06	8.21e-10	1.22904e-06	0.000307742
			DE: Tap water from groundwater ts				-0.000824	-0.000886	-3.63e-07	-0.000257	-0.00894	-1.75e-06	-1.03e-07	-8.55e-06	-0.000431	-3.87e-06	-2.13e-05	-2.51e-06	-2.08e-07	-0.000189	-1.1e-06	-1.09e-06	-6.16e-10	-9.21778e-07	-0.000230807
			EU-28: Compressed air ts				0.00524096	0.00521478	2.35851e-06	0.0021129	4.69446e-05	3.86009e-07	1.3909e-08	2.02912e-06	0.00012104	0.000335903	0.000301947	1.22844e-06	1.20117e-07	6.78993e-06	6.038e-06	5.99919e-06	1.66652e-09	7.52462e-06	0.00153937
		DE: B.06 - perovskite depostion (evaporation) -rev5- (008*) <Mfg>					5.18979	5.16285	0.00159031	1.50598	0.207681	0.000834861	4.19458e-05	0.00354796	0.271143	0.0853612	0.396154	0.00188918	0.00016351	0.0562814	0.00549118	0.00546175	2.84514e-06	0.00504613	1.90485
			DE: preparation of lead iodide (008*) <Mfg>				0.0739374	0.0739078	9.32426e-05	0.0217534	0.000314586	0.000446526	1.73127e-05	0.00164177	0.138651	0.00221745	0.00131632	0.000701965	1.54743e-06	0.0351792	0.000123823	0.000121858	3.33336e-07	0.000267139	0.213753
				DE: preparation of lead nitrate (008*) <Mfg>			0.023109	0.023103	4.09156e-05	0.00487248	0.000122215	0.00026025	7.91389e-06	0.000806708	0.11232	0.000479308	0.000402546	0.000377759	6.56483e-07	0.000639797	4.97351e-05	4.91323e-05	3.1703e-07	0.000135401	0.0786406
					DE: Electricity grid mix 1kV-60kV ts		0.00214528	0.00213339	6.2282e-07	0.000621188	8.24938e-06	1.34089e-07	8.79685e-09	6.65584e-07	4.99832e-05	3.45834e-05	0.000166337	4.52011e-07	6.6312e-08	3.96841e-06	2.24646e-06	2.23513e-06	1.05324e-09	1.99228e-06	0.000698905
					DE: Nitrogen (gaseous) ts		9.62474e-05	9.57215e-05	2.79522e-08	2.78702e-05	4.14882e-07	6.05948e-09	3.97162e-10	3.00713e-08	2.25355e-06	1.55117e-06	7.46082e-06	2.03415e-08	2.97998e-09	1.79103e-07	1.00829e-07	1.0032e-07	4.7255e-11	8.9409e-08	3.13567e-05
					GLO: market for lead ecoinvent 3.5		0.0040912	0.00409055	2.69947e-05	0.00115056	4.65667e-05	0.000217306	6.43318e-06	0.000668341	0.105106	0.000192371	0.000134264	0.000298985	3.30789e-07	0.000592545	2.08466e-05	2.05126e-05	4.07471e-09	8.31676e-05	0.0525753
					RER: nitric acid production, product in 50% solution state ecoinvent 3.5		0.0106022	0.0105878	8.5436e-06	0.000985397	5.91009e-05	3.2672e-05	8.27662e-07	7.93404e-05	0.00598194	9.11437e-05	3.56054e-05	5.4313e-05	2.08329e-07	4.15328e-05	1.90971e-05	1.90083e-05	3.10459e-07	3.59583e-05	0.0157843
					RER: steam production, in chemical industry ecoinvent 3.5		0.00617407	0.00619551	4.72657e-06	0.00208746	7.88315e-06	1.01319e-05	6.43851e-07	5.83305e-05	0.00117994	0.000159659	5.88787e-05	2.39883e-05	4.80725e-08	1.57209e-06	7.4441e-06	7.27596e-06	1.39591e-09	1.41938e-05	0.00955073
				DE: preparation of potassium iodide (008*) <Mfg>			0.0400516	0.0400164	4.54408e-05	0.0133766	0.000171181	0.000173121	8.56254e-06	0.00075947	0.0247525	0.00148741	0.000615813	0.000292882	7.40655e-07	0.0345321	6.15491e-05	6.04177e-05	1.31098e-08	0.000110895	0.121946
					DE: Electricity grid mix 1kV-60kV ts		0.0021505	0.00213858	6.24335e-07	0.000622699	8.26945e-06	1.34415e-07	8.81826e-09	6.67203e-07	5.01048e-05	3.46675e-05	0.000166742	4.53111e-07	6.64734e-08	3.97807e-06	2.25192e-06	2.24057e-06	1.0558e-09	1.99713e-06	0.000700605
					DE: Nitrogen (gaseous) ts		9.64815e-05	9.59544e-05	2.80203e-08	2.7938e-05	4.15892e-07	6.07423e-09	3.98128e-10	3.01445e-08	2.25904e-06	1.55495e-06	7.47898e-06	2.0391e-08	2.98723e-09	1.79538e-07	1.01074e-07	1.00564e-07	4.737e-11	8.96266e-08	3.1433e-05
					GLO: market for iodine ecoinvent 3.5		0.0261056	0.026075	2.89695e-05	0.00867067	0.00010628	0.000102888	5.11907e-06	0.000455637	0.0150097	0.000819863	0.000227337	0.000184153	4.2663e-07	0.0345082	3.87324e-05	3.795e-05	8.22802e-09	7.34188e-05	0.0948801
					GLO: market for potassium hydroxide ecoinvent 3.5		0.00550988	0.00549632	1.10809e-05	0.00196272	4.83134e-05	5.99363e-05	2.78884e-06	0.000244664	0.0085076	0.000471277	0.000155233	8.42093e-05	1.96375e-07	1.82181e-05	1.30015e-05	1.2833e-05	2.37927e-09	2.11613e-05	0.0167602
					RER: steam production, in chemical industry ecoinvent 3.5		0.0061891	0.00621059	4.73807e-06	0.00209254	7.90233e-06	1.01565e-05	6.45417e-07	5.84724e-05	0.00118281	0.000160047	5.9022e-05	2.40467e-05	4.81895e-08	1.57591e-06	7.46221e-06	7.29366e-06	1.39931e-09	1.42284e-05	0.00957397
				DE: Electricity grid mix 1kV-60kV ts			0.00274722	0.00273199	7.97573e-07	0.000795483	1.0564e-05	1.71712e-07	1.12651e-08	8.52336e-07	6.40077e-05	4.42869e-05	0.000213008	5.78838e-07	8.49181e-08	5.08189e-06	2.87678e-06	2.86227e-06	1.34876e-09	2.55128e-06	0.000895006
				DE: Nitrogen (gaseous) ts			0.000123253	0.000122579	3.57952e-08	3.56901e-05	5.31291e-07	7.75967e-09	5.08599e-10	3.85088e-08	2.88586e-06	1.98641e-06	9.55421e-06	2.6049e-08	3.81611e-09	2.29356e-07	1.2912e-07	1.28469e-07	6.0514e-11	1.14496e-07	4.01549e-05
				RER: steam production, in chemical industry ecoinvent 3.5			0.00790642	0.00793387	6.05276e-06	0.00267317	1.0095e-05	1.29747e-05	8.24505e-07	7.4697e-05	0.00151101	0.000204456	7.53992e-05	3.07191e-05	6.15609e-08	2.01319e-06	9.53279e-06	9.31748e-06	1.78758e-09	1.81764e-05	0.0122305
			DE: preparation of methylamonium iodide (CH3NH3I) (008*) <Mfg>				0.0100572	0.0100534	9.75283e-06	0.00370323	5.29326e-05	3.33514e-05	1.62632e-06	0.000146618	0.00488256	0.000314624	0.000149164	6.20579e-05	4.29512e-07	0.00772285	1.41064e-05	1.37573e-05	3.24174e-09	2.64548e-05	0.0289735
				DE: preparation of hydriodic acid (57% in H2O) (008*) <Mfg>			0.00894146	0.00893801	8.4637e-06	0.00295682	3.10438e-05	2.68584e-05	1.38756e-06	0.000123934	0.00381693	0.000256452	0.00013627	5.02602e-05	1.38931e-07	0.00771999	1.22817e-05	1.20387e-05	2.76057e-09	2.24246e-05	0.0250003
					DE: Electricity grid mix 1kV-60kV ts		0.00078572	0.000781364	2.28111e-07	0.000227513	3.02137e-06	4.91107e-08	3.22189e-09	2.43773e-07	1.83066e-05	1.26663e-05	6.09216e-05	1.65551e-07	2.42871e-08	1.45345e-06	8.22775e-07	8.18627e-07	3.85754e-10	7.29682e-07	0.000255977
					DE: Nitrogen (gaseous) ts		3.5251e-05	3.50584e-05	1.02376e-08	1.02076e-05	1.51952e-07	2.21931e-09	1.45462e-10	1.10138e-08	8.25374e-07	5.68124e-07	2.73256e-06	7.45018e-09	1.09143e-09	6.55971e-08	3.6929e-08	3.67428e-08	1.73074e-11	3.27465e-08	1.14845e-05
					DE: Water (desalinated; deionised) ts		1.29244e-06	1.31763e-06	5.62088e-10	4.20124e-07	8.37508e-07	8.96046e-10	5.19245e-11	4.32708e-09	2.30813e-07	1.42983e-08	7.0563e-08	1.40234e-09	1.3281e-10	2.27199e-08	2.12571e-09	2.10753e-09	7.00049e-13	1.70017e-09	3.44578e-07
					GLO: market for iodine ecoinvent 3.5		0.0058386	0.00583174	6.47912e-06	0.00193922	2.37697e-05	2.30112e-05	1.1449e-06	0.000101905	0.00335697	0.000183365	5.08446e-05	4.11863e-05	9.54172e-08	0.00771786	8.66262e-06	8.48762e-06	1.84022e-09	1.64203e-05	0.0212202
					RER: market for hydrogen, liquid ecoinvent 3.5		1.9321e-05	1.93915e-05	1.45494e-08	1.49195e-05	3.76014e-07	8.41652e-08	3.43679e-09	4.06617e-07	8.43448e-06	1.36283e-06	1.36357e-07	1.13666e-07	3.96105e-10	1.40375e-08	3.0792e-08	2.87676e-08	5.32846e-12	4.1551e-08	1.42989e-05
					RER: steam production, in chemical industry ecoinvent 3.5		0.00226128	0.00226913	1.73113e-06	0.000764542	2.88724e-06	3.71085e-06	2.35813e-07	2.13638e-05	0.000432158	5.84757e-05	2.15646e-05	8.78584e-06	1.76068e-08	5.75785e-07	2.72644e-06	2.66485e-06	5.1126e-10	5.19855e-06	0.003498
				GLO: market for methanol ecoinvent 3.5			7.00291e-05	7.00547e-05	6.66883e-08	7.81134e-05	4.25267e-07	3.82296e-07	1.21255e-08	1.19098e-06	6.24935e-05	1.17976e-06	3.34117e-07	5.93522e-07	7.48616e-10	1.55836e-07	1.41203e-07	1.31874e-07	3.66324e-11	1.77356e-07	7.06352e-05
				RER: market for methylamine ecoinvent 3.5			0.00104576	0.00104531	1.22244e-06	0.000668291	2.14635e-05	6.11071e-06	2.26626e-07	2.14933e-05	0.00100314	5.6992e-05	1.25597e-05	1.12042e-05	2.89832e-07	2.70476e-06	1.68352e-06	1.58674e-06	4.44541e-10	3.8529e-06	0.00390254
			DE: Electricity grid mix 1kV-60kV ts				4.91253	4.8853	0.00142621	1.42247	0.0188904	0.000307054	2.01441e-05	0.00152414	0.114458	0.0791933	0.380898	0.00103507	0.000151849	0.00908736	0.00514421	0.00511828	2.41184e-06	0.00456217	1.60044
			DE: Nitrogen (liquid) ts				0.160974	0.160086	4.67398e-05	0.046612	0.000645796	1.00876e-05	6.61575e-07	5.00686e-05	0.00375718	0.00259477	0.0124802	3.39544e-05	4.97874e-06	0.00029841	0.000168591	0.000167741	7.90321e-08	0.000149509	0.0524435
			DE: Tap water from groundwater ts				0.0692324	0.0744043	3.05163e-05	0.0216269	0.750574	0.000146958	8.6454e-06	0.00071829	0.0361957	0.000325321	0.00178978	0.0002105	1.74467e-05	0.0158965	9.27615e-05	9.18865e-05	5.17394e-08	7.74294e-05	0.0193878
			DE: Tap water from groundwater ts				-0.0519243	-0.0558033	-2.28872e-05	-0.0162202	-0.562931	-0.000110219	-6.48405e-06	-0.000538717	-0.0271468	-0.000243991	-0.00134234	-0.000157875	-1.3085e-05	-0.0119224	-6.95711e-05	-6.89149e-05	-3.88045e-08	-5.8072e-05	-0.0145408
			EU-28: Compressed air ts				0.0149742	0.0148994	6.7386e-06	0.00603686	0.000134127	1.10288e-06	3.97399e-08	5.79748e-06	0.000345829	0.000959723	0.000862706	3.50982e-06	3.4319e-07	1.93998e-05	1.72514e-05	1.71405e-05	4.76147e-09	2.14989e-05	0.00439821
		DE: B.07 - curing (perovskite layer) -rev4- (001) <Mfg>					0.739352	0.735471	0.000219809	0.217546	0.0302182	5.17212e-05	3.29179e-06	0.000256972	0.0184748	0.0133268	0.0565999	0.000163599	2.31698e-05	0.00192317	0.000778098	0.000774113	3.58453e-07	0.000702283	0.239796
			DE: Electricity grid mix 1kV-60kV ts				0.706892	0.702973	0.000205225	0.204687	0.00271825	4.41836e-05	2.89865e-06	0.000219316	0.01647	0.0113956	0.0548096	0.000148942	2.18504e-05	0.00130763	0.000740229	0.000736498	3.47052e-07	0.000656476	0.230296
			DE: Tap water from groundwater ts				0.0100473	0.0107979	4.42867e-06	0.0031386	0.108927	2.13273e-05	1.25466e-06	0.000104242	0.00525289	4.72122e-05	0.000259742	3.05487e-05	2.53195e-06	0.00230697	1.3462e-05	1.3335e-05	7.50866e-09	1.12369e-05	0.00281364
			DE: Tap water from groundwater ts				-0.0075355	-0.00809843	-3.3215e-06	-0.00235395	-0.0816951	-1.59955e-05	-9.40996e-07	-7.81812e-05	-0.00393967	-3.54091e-05	-0.000194806	-2.29115e-05	-1.89896e-06	-0.00173023	-1.00965e-05	-1.00013e-05	-5.63149e-09	-8.42769e-06	-0.00211023
			EU-28: Compressed air ts				0.0299483	0.0297988	1.34772e-05	0.0120737	0.000268255	2.20576e-06	7.94798e-08	1.1595e-05	0.000691658	0.00191945	0.00172541	7.01964e-06	6.86381e-07	3.87996e-05	3.45029e-05	3.42811e-05	9.52295e-09	4.29978e-05	0.00879642
		DE: B.08 - sputter FS: ZnO (zinc-oxide) -rev4- (001) <Mfg>					0.214127	0.213058	6.28848e-05	0.0623009	0.0167159	1.79572e-05	1.09677e-06	8.58263e-05	0.0065145	0.00354909	0.0164755	5.96704e-05	6.9245e-06	0.000728837	0.000225039	0.000223889	1.05103e-07	0.000200513	0.0802523
			DE: Argon (liquid) ts				0.000152	0.00015116	4.4132e-08	4.40134e-05	5.99638e-07	9.51538e-09	6.24128e-10	4.72298e-08	3.54521e-06	2.45021e-06	1.17849e-05	3.20474e-08	4.70007e-09	2.81533e-07	1.59183e-07	1.5838e-07	7.46259e-11	1.41168e-07	4.95198e-05
			DE: Electricity grid mix 1kV-60kV ts				0.20197	0.20085	5.8636e-05	0.0584824	0.000776647	1.2624e-05	8.28189e-07	6.26621e-05	0.00470572	0.00325589	0.01566	4.2555e-05	6.24302e-06	0.000373611	0.000211495	0.000210429	9.91583e-08	0.000187565	0.0657991
			DE: Nitrogen (liquid) ts				0.00817645	0.00813136	2.37408e-06	0.00236759	3.28023e-05	5.12388e-07	3.36038e-08	2.54317e-06	0.000190841	0.000131798	0.000633914	1.72467e-06	2.52888e-07	1.51573e-05	8.56335e-06	8.52017e-06	4.01433e-09	7.59409e-06	0.0026638
			DE: Oxygen (liquid) ts				6.23615e-07	6.20169e-07	1.81062e-10	1.80575e-07	2.46023e-09	3.90391e-11	2.56063e-12	1.93771e-10	1.45451e-08	1.00525e-08	4.83501e-08	1.31482e-10	1.92831e-11	1.15506e-09	6.53084e-10	6.49792e-10	3.0617e-13	5.79175e-10	2.03166e-07
			DE: Tap water from groundwater ts				0.00586094	0.00629878	2.58339e-06	0.00183085	0.0635407	1.24409e-05	7.31886e-07	6.08076e-05	0.00306419	2.75404e-05	0.000151516	1.78201e-05	1.47697e-06	0.00134573	7.85282e-06	7.77875e-06	4.38005e-09	6.55487e-06	0.00164129
			DE: Tap water from groundwater ts				-0.00439571	-0.00472409	-1.93754e-06	-0.00137314	-0.0476555	-9.33069e-06	-5.48914e-07	-4.56057e-05	-0.00229814	-2.06553e-05	-0.000113637	-1.33651e-05	-1.10773e-06	-0.0010093	-5.88962e-06	-5.83406e-06	-3.28504e-09	-4.91615e-06	-0.00123097
			EU-28: Compressed air ts				0.00224613	0.00223491	1.01079e-06	0.000905528	2.01191e-05	1.65432e-07	5.96099e-09	8.69622e-07	5.18743e-05	0.000143958	0.000129406	5.26473e-07	5.14786e-08	2.90997e-06	2.58772e-06	2.57108e-06	7.14221e-10	3.22484e-06	0.000659732
			GLO: market for zinc oxide ecoinvent 3.5				0.000116117	0.000115319	1.73737e-07	4.35197e-05	5.13635e-07	1.5356e-06	4.54177e-08	4.50208e-06	0.000796457	8.0996e-06	2.5248e-06	1.03771e-05	3.15674e-09	4.4288e-07	2.6993e-07	2.64983e-07	4.62577e-11	3.48167e-07	0.0106696
		DE: B.09 - sputter FS_#2: ITO (indium-tin-oxide) -rev4- (001) <LC>					1.54093	1.53344	0.000524951	0.449578	0.119666	0.00100013	3.83356e-05	0.00252095	0.332728	0.0277626	0.117009	0.00264205	5.07652e-05	0.00716367	0.0017002	0.00168821	7.59873e-07	0.00162546	2.05295
			DE: Argon (liquid) ts				0.001064	0.00105812	3.08924e-07	0.000308094	4.19746e-06	6.66077e-08	4.3689e-09	3.30608e-07	2.48165e-05	1.71514e-05	8.24941e-05	2.24332e-07	3.29005e-08	1.97073e-06	1.11428e-06	1.10866e-06	5.22381e-10	9.88177e-07	0.000346638
			DE: Electricity grid mix 1kV-60kV ts				1.41379	1.40595	0.000410452	0.409377	0.00543653	8.83677e-05	5.79732e-06	0.000438635	0.0329401	0.0227912	0.10962	0.000297885	4.37011e-05	0.00261527	0.00148047	0.001473	6.94108e-07	0.00131296	0.460594
			DE: Nitrogen (liquid) ts				0.0719527	0.0715559	2.08919e-05	0.0208348	0.00028866	4.50901e-06	2.95713e-07	2.23799e-05	0.0016794	0.00115982	0.00557845	1.51771e-05	2.22542e-06	0.000133384	7.53575e-05	7.49775e-05	3.53261e-08	6.6828e-05	0.0234414
			DE: Oxygen (liquid) ts				9.35423e-06	9.30253e-06	2.71592e-09	2.70862e-06	3.69034e-08	5.85587e-10	3.84095e-11	2.90657e-09	2.18176e-07	1.50788e-07	7.25252e-07	1.97223e-09	2.89247e-10	1.73259e-08	9.79626e-09	9.74687e-09	4.59255e-12	8.68762e-09	3.04749e-06
			DE: Tap water from groundwater ts				0.0418639	0.0449913	1.84528e-05	0.0130775	0.453862	8.88637e-05	5.22775e-06	0.00043434	0.021887	0.000196717	0.00108226	0.000127286	1.05498e-05	0.00961238	5.60916e-05	5.55625e-05	3.12861e-08	4.68205e-05	0.0117235
			DE: Tap water from groundwater ts				-0.0313979	-0.0337435	-1.38396e-05	-0.00980812	-0.340396	-6.66478e-05	-3.92082e-06	-0.000325755	-0.0164153	-0.000147538	-0.000811693	-9.54647e-05	-7.91233e-06	-0.00720928	-4.20687e-05	-4.16719e-05	-2.34646e-08	-3.51154e-05	-0.00879264
			EU-28: Compressed air ts				0.0149742	0.0148994	6.7386e-06	0.00603686	0.000134127	1.10288e-06	3.97399e-08	5.79748e-06	0.000345829	0.000959723	0.000862706	3.50982e-06	3.4319e-07	1.93998e-05	1.72514e-05	1.71405e-05	4.76147e-09	2.14989e-05	0.00439821
			RER: market for indium tin oxide powder, nanoscale, for sputtering target ecoinvent 3.5				0.0286771	0.0287134	8.19439e-05	0.00974981	0.000337293	0.000883866	3.08914e-05	0.00194522	0.292266	0.00278531	0.000594093	0.00229343	1.82487e-06	0.00199053	0.000111979	0.000108078	1.73284e-08	0.000211473	1.56123
		DE: B.10 - contact formation/ metallization (Ag-fingers) -rev4- (001) <Mfg>					3.7582	3.72111	0.00852558	1.21079	0.020924	0.237232	0.00837335	0.627901	64.7377	0.212636	0.282119	1.06314	0.000240943	0.382639	0.0180582	0.0177719	3.26054e-06	0.0167578	31.3345
			DE: manufacturing of printing screens (application of ag-fingers) <Mfg>				0.750945	0.753111	0.00264841	0.241047	0.00481979	0.0312263	0.00029676	0.261178	1.22968	0.0361759	0.022916	0.0528995	2.2142e-05	0.0729988	0.00212617	0.00206506	2.25914e-07	0.00317252	24.9311
				DE: Aluminium frame profile, powder coated (EN15804 A1-A3) ts			0.0301047	0.0301372	2.26507e-05	0.00946138	0.000223854	5.2606e-06	1.07292e-07	2.29868e-05	0.00129909	0.000741893	0.000593181	1.36076e-05	5.92132e-07	0.000151375	4.50997e-05	4.47844e-05	6.43589e-09	7.06478e-05	0.00746891
				RER: market for adhesive, for metal ecoinvent 3.5			0.020862	0.0207898	2.90339e-05	0.00966869	0.000240526	0.000506539	7.52357e-06	0.000747517	0.0258876	0.00133507	0.000369297	0.000265515	5.62887e-07	5.79547e-05	4.54457e-05	4.20096e-05	6.15019e-09	6.09514e-05	0.0608
				RER: steel production, chromium steel 18/8, hot rolled ecoinvent 3.5			0.699978	0.702184	0.00259672	0.221917	0.00435541	0.0307145	0.00028913	0.260408	1.20249	0.0340989	0.0219535	0.0526204	2.0987e-05	0.0727895	0.00203563	0.00197826	2.13328e-07	0.00304093	24.8628
			RER: preparation of Ag-paste (95% Ag, 5% unknown solvent) <Mfg>				1.65463	1.62278	0.00547391	0.561814	0.0101723	0.204163	0.00808242	0.366715	63.5768	0.147937	0.157085	1.00796	0.000178848	0.307382	0.0144978	0.0142801	2.39568e-06	0.0122946	6.18338
				EU-28: Electricity grid mix 1kV-60kV ts			0.000502335	0.00049982	2.25263e-07	0.000202107	4.47295e-06	3.69691e-08	1.34079e-09	1.94224e-07	1.15973e-05	3.20358e-05	2.90737e-05	1.17623e-07	1.15608e-08	6.53082e-07	5.77923e-07	5.74211e-07	1.60233e-10	7.18694e-07	0.000147597
				GLO: market for chemical, organic ecoinvent 3.5			0.000251202	0.000250733	3.3299e-07	0.000183863	5.11236e-06	1.3344e-06	5.68544e-08	6.61769e-06	0.000171725	7.16055e-06	2.13013e-06	1.93682e-06	4.98673e-09	3.528e-07	6.3216e-07	5.59693e-07	5.23399e-11	7.59208e-07	0.000419974
				GLO: market for silver ecoinvent 3.5			1.65083	1.61898	0.00545314	0.560332	0.0101248	0.204135	0.0080811	0.366474	63.5735	0.147557	0.156899	1.00792	0.000178737	0.306618	0.0144766	0.0142593	2.39226e-06	0.0122401	6.17756
				GLO: market for solder factory ecoinvent 3.5			2.50367e-07	2.149e-07	4.99539e-10	6.49306e-08	2.06822e-09	4.38766e-09	7.22002e-11	2.33799e-08	3.64038e-07	6.82341e-09	1.23278e-07	6.45146e-09	2.13794e-11	3.83498e-09	8.30131e-10	8.01378e-10	7.3821e-14	1.57384e-09	1.47461e-06
				GLO: market for tin ecoinvent 3.5			0.00269515	0.00269765	1.99752e-05	0.000961579	3.73882e-05	2.57341e-05	1.24238e-06	0.000230442	0.00299606	0.000335293	0.000147606	3.39123e-05	9.29483e-08	0.000763013	1.90657e-05	1.87716e-05	3.09624e-09	5.24657e-05	0.00248012
				RER: market for transport, freight, inland waterways, barge ecoinvent 3.5			5.11855e-06	5.13975e-06	1.03886e-08	1.64956e-06	2.13734e-08	1.59118e-08	6.85611e-10	1.65441e-07	1.76881e-06	2.4703e-07	2.38948e-07	2.57467e-08	6.83794e-11	1.79747e-08	5.90261e-08	5.84758e-08	5.19053e-12	2.8852e-08	7.11856e-06
				RER: market for transport, freight, lorry, unspecified ecoinvent 3.5			0.000115753	0.000115753	1.65987e-07	4.21498e-05	3.44614e-07	6.93903e-07	9.73964e-09	2.45564e-06	9.22145e-05	2.35017e-06	6.21687e-06	2.77507e-06	1.14666e-09	2.29447e-07	6.3061e-07	6.18276e-07	5.1047e-11	3.83129e-07	0.00271277
				RER: market group for heat, district or industrial, natural gas ecoinvent 3.5			0.000218342	0.000218377	4.10046e-08	8.72129e-05	8.51076e-08	1.39685e-07	3.15802e-09	7.54189e-07	8.98499e-06	1.08389e-06	1.39143e-07	5.58151e-07	2.55523e-10	6.11263e-08	1.55818e-07	1.50113e-07	5.54069e-11	1.2137e-07	1.72441e-05
				RER: market group for transport, freight train ecoinvent 3.5			1.05945e-05	1.06224e-05	2.24943e-08	4.06668e-06	8.76685e-08	9.28703e-08	4.74594e-09	9.70813e-07	1.12328e-05	1.75295e-06	5.72351e-07	1.37674e-07	3.45211e-10	6.47951e-08	8.246e-08	8.13216e-08	5.00212e-12	5.64121e-08	3.0809e-05
			DE: Electricity grid mix 1kV-60kV ts				1.21182	1.2051	0.000351816	0.350894	0.00465988	7.57437e-05	4.96913e-06	0.000375973	0.0282343	0.0195353	0.0939597	0.00025533	3.74581e-05	0.00224166	0.00126897	0.00126257	5.9495e-07	0.00112539	0.394795
			EU-28: Compressed air ts				0.140009	0.139309	6.3006e-05	0.0564446	0.00125409	1.03119e-05	3.71568e-07	5.42064e-05	0.0032335	0.00897341	0.0080663	3.28168e-05	3.20883e-06	0.000181388	0.000161301	0.000160264	4.45198e-08	0.000201015	0.0411233
			Europe without Switzerland: market for scrap steel ecoinvent 3.5				0.00121981	0.00122083	2.69273e-06	0.000709021	2.58024e-05	0.00203591	1.6359e-07	0.000110168	0.00242358	4.35706e-05	0.00013457	0.00244068	1.57401e-08	2.83543e-06	9.33169e-06	9.14509e-06	7.60422e-10	6.09163e-06	0.0113472
			GLO: market for anode slime, silver and tellurium containing stockpiling ecoinvent 3.5				-0.000553481	-0.000540868	-1.45075e-05	-0.000170072	-9.09401e-06	-0.000284442	-1.13707e-05	-0.000537889	-0.103365	-3.65346e-05	-5.31201e-05	-0.00044951	-7.33052e-07	-0.000168187	-5.88987e-06	-5.78197e-06	-1.332e-09	-4.23555e-05	-0.227573
			GLO: market for waste aluminium ecoinvent 3.5				0.000123983	0.000124858	2.59467e-07	4.81321e-05	1.30301e-06	5.38812e-06	4.1006e-08	4.91869e-06	0.000692222	7.27061e-06	1.04087e-05	6.74461e-06	3.19245e-09	2.06729e-07	5.28845e-07	5.1959e-07	4.9511e-11	5.40899e-07	0.00035454
		DE: B.11 - curing (module) -rev4- (001) <Mfg>					0.472912	0.470384	0.000164437	0.156242	0.00268732	3.14536e-05	1.69333e-06	0.000159795	0.0109837	0.0157767	0.0332816	0.000103669	1.32597e-05	0.000780604	0.000513046	0.000510188	2.0278e-07	0.000525361	0.148618
			DE: Electricity grid mix 1kV-60kV ts				0.302955	0.301276	8.7954e-05	0.0877236	0.00116497	1.89359e-05	1.24228e-06	9.39931e-05	0.00705859	0.00488383	0.0234899	6.38326e-05	9.36452e-06	0.000560416	0.000317243	0.000315643	1.48737e-07	0.000281348	0.0986987
			EU-28: Compressed air ts				0.169957	0.169108	7.64832e-05	0.0685183	0.00152235	1.25177e-05	4.51048e-07	6.58014e-05	0.00392516	0.0108929	0.00979171	3.98365e-05	3.89521e-06	0.000220188	0.000195804	0.000194545	5.40427e-08	0.000244013	0.0499197
		DE: B.12 - test -rev4- (001) <Mfg>					0.350757	0.348814	0.000102208	0.101833	0.00136084	2.195e-05	1.43489e-06	0.000109005	0.00817184	0.00576756	0.0271493	7.39602e-05	1.08233e-05	0.000647534	0.000367546	0.00036569	1.71798e-07	0.000326937	0.114196
			DE: Electricity grid mix 1kV-60kV ts				0.348398	0.346467	0.000101147	0.100882	0.00133972	2.17763e-05	1.42863e-06	0.000108092	0.00811737	0.00561641	0.0270134	7.34075e-05	1.07692e-05	0.000644478	0.000364829	0.00036299	1.71048e-07	0.00032355	0.113503
			EU-28: Compressed air ts				0.00235843	0.00234665	1.06133e-06	0.000950805	2.11251e-05	1.73704e-07	6.25904e-09	9.13103e-07	5.4468e-05	0.000151156	0.000135876	5.52797e-07	5.40525e-08	3.05547e-06	2.7171e-06	2.69963e-06	7.49932e-10	3.38608e-06	0.000692718
		DE: external waste water treatment [drain acid - X.02] -rev4- (001) <LC>					0.00212506	0.00213402	2.91659e-06	0.000720563	-0.000154634	1.37296e-05	2.63906e-06	5.42691e-05	0.00176462	9.20034e-05	0.000101862	4.76595e-05	7.1967e-06	5.36769e-06	1.04871e-05	1.02837e-05	1.75303e-09	6.89016e-06	0.0435945
			CH: treatment of wastewater from PV cell production, capacity 5E9l/year ecoinvent 3.5				0.000293147	0.000302189	2.74876e-07	5.49143e-05	-0.000160011	2.79857e-06	2.48643e-06	1.56095e-05	0.000310059	5.75075e-05	4.13717e-06	3.92795e-06	7.1787e-06	1.75873e-06	5.26616e-07	5.17725e-07	9.47104e-10	8.17779e-07	0.000837443
			GLO: market group for transport, freight, lorry, unspecified ecoinvent 3.5				0.00183192	0.00183183	2.64171e-06	0.000665648	5.37679e-06	1.0931e-05	1.5263e-07	3.86595e-05	0.00145456	3.4496e-05	9.77247e-05	4.37316e-05	1.80055e-08	3.60896e-06	9.9605e-06	9.76597e-06	8.0593e-10	6.07238e-06	0.042757
		DE: X.01 - exhaust abatement [defaul] -rev5- (001) <Mfg>					0.642809	0.642081	0.000348405	0.156435	0.0156134	0.000321238	1.4838e-05	0.00132531	0.0477229	0.0092038	0.0112162	0.000483118	5.50553e-06	0.000692312	0.00225748	0.00225437	8.03664e-08	0.0010576	0.151741
			DE: preparation of potassium hydroxide (50% in H2O) <Mfg>				0.0277402	0.0276723	5.57267e-05	0.00987963	0.000247298	0.000300744	1.41163e-05	0.00123176	0.0426592	0.00236019	0.000786493	0.000424823	1.00633e-06	9.17365e-05	6.64842e-05	6.56173e-05	1.19851e-08	0.000106571	0.0872617
				GLO: market for potassium hydroxide ecoinvent 3.5			0.0275051	0.0274374	5.53151e-05	0.00979783	0.000241179	0.0002992	1.39217e-05	0.00122135	0.0424696	0.0023526	0.000774917	0.000420369	9.80294e-07	9.09442e-05	6.49029e-05	6.40616e-05	1.18772e-08	0.000105636	0.0836662
				GLO: market for water, ultrapure ecoinvent 3.5			0.000235106	0.000234912	4.1159e-07	8.18027e-05	6.11984e-06	1.54422e-06	1.94564e-07	1.04096e-05	0.000189653	7.59856e-06	1.15764e-05	4.45399e-06	2.60378e-08	7.92269e-07	1.58126e-06	1.55562e-06	1.07936e-10	9.34906e-07	0.00359552
			DE: X.03 - ultrapure water system -rev4- (001) <Mfg>				0.0173855	0.0173964	5.44295e-06	0.00506703	0.0143583	6.45199e-06	2.66174e-07	4.10665e-05	0.00126541	0.000271441	0.00126999	1.16237e-05	8.3067e-07	0.000336533	1.86988e-05	1.85877e-05	1.13755e-08	1.6704e-05	0.00713311
				CH: ion-exchanger production for water treatment ecoinvent 3.5			0.000172315	0.000172802	2.47155e-07	5.26454e-05	1.65006e-06	2.65952e-06	3.63343e-08	2.24545e-05	0.00020569	8.99901e-06	3.50376e-06	4.26554e-06	7.06799e-09	4.36544e-06	2.87785e-07	2.77226e-07	2.58657e-09	4.68158e-07	0.0015856
				DE: Electricity grid mix 1kV-60kV ts			0.0158943	0.0158062	4.61445e-06	0.00460236	6.11194e-05	9.93461e-07	6.51756e-08	4.93129e-06	0.000370324	0.000256227	0.00123238	3.34893e-06	4.91303e-07	2.94018e-05	1.66439e-05	1.656e-05	7.80341e-09	1.47607e-05	0.00517816
				DE: Tap water from groundwater ts			0.00131861	0.00141711	5.81216e-07	0.000411908	0.0142955	2.79898e-06	1.64661e-07	1.36806e-05	0.000689387	6.1961e-06	3.40884e-05	4.0092e-06	3.32291e-07	0.000302766	1.76674e-06	1.75008e-06	9.85433e-10	1.47473e-06	0.000369261
				DE: X.03 - ultra pure water system -rev4- (001) ecoinvent 3.5 <u-so>			6.80301e-12	6.80301e-12	0	0	-4.15016e-14	0	2.42357e-12	0	0	0	0	0	3.5296e-13	0	0	0	0	0	0
				EU-28: Compressed air ts			2.94604e-07	2.93132e-07	1.32576e-10	1.1877e-07	2.63884e-09	2.16982e-11	7.81848e-13	1.1406e-10	6.80388e-09	1.88817e-08	1.6973e-08	6.90526e-11	6.75197e-12	3.81674e-10	3.39407e-10	3.37225e-10	9.36778e-14	4.22972e-10	8.65309e-08
			DE: Electricity grid mix 1kV-60kV ts				0.0504248	0.0501452	1.46393e-05	0.014601	0.000193901	3.15175e-06	2.06769e-07	1.56445e-05	0.00117485	0.00081288	0.00390974	1.06245e-05	1.55866e-06	9.32773e-05	5.28028e-05	5.25367e-05	2.47563e-08	4.68284e-05	0.0164277
			DE: emission, direct [default] -rev4- [X.01] <u-so>				0.42094	0.42094	0.000216874	0	0	0	0	0	0	0	0	0	0	0	0.00197159	0.00197159	0	0.000709771	0
			DE: Natural gas mix ts				0.0365938	0.0366506	1.53446e-05	0.0907151	1.02756e-05	4.28203e-06	1.06467e-08	2.09918e-06	0.000551186	8.67448e-06	8.07241e-05	1.50163e-05	5.34931e-08	5.45221e-05	4.45378e-05	4.33369e-05	3.71897e-09	4.89103e-05	0.014565
			EU-28: Compressed air ts				0.0897245	0.0892763	4.03774e-05	0.0361725	0.000803685	6.60841e-06	2.3812e-07	3.47382e-05	0.00207219	0.00575061	0.00516929	2.10307e-05	2.05638e-06	0.000116243	0.00010337	0.000102705	2.85305e-08	0.00012882	0.0263539
		DE: X.02 - tray cleaning -rev5- (001) <Mfg>					0.358072	0.356264	0.000244224	0.120557	0.00160137	3.75636e-05	1.53053e-06	0.000137895	0.0138314	0.00513098	0.0242819	0.000126311	1.0074e-05	0.00349373	0.000454367	0.000451186	1.62992e-07	0.000792594	0.133613
			DE: preparation of phosphoric acid (85% H3PO4) <Mfg>				0.05509	0.0549594	0.000156258	0.0328252	0.00014593	1.85707e-05	2.84905e-07	4.3624e-05	0.00675882	0.000247025	0.000791319	6.23966e-05	7.0269e-07	0.00292716	0.000137088	0.000135507	1.42346e-08	0.000511216	0.0349064
				DE: Phosphoric acid (100%) (wet process) ts			0.0549682	0.0548377	0.000156045	0.0327828	0.000142761	1.77709e-05	1.84133e-07	3.82325e-05	0.00666059	0.000243089	0.000785323	6.00898e-05	6.89204e-07	0.00292675	0.000136269	0.000134702	1.41787e-08	0.000510732	0.0330441
				GLO: market for water, ultrapure ecoinvent 3.5			0.00012177	0.00012167	2.13177e-07	4.23686e-05	3.16969e-06	7.99808e-07	1.00772e-07	5.39149e-06	9.82284e-05	3.93557e-06	5.99582e-06	2.30688e-06	1.34859e-08	4.10345e-07	8.18992e-07	8.05714e-07	5.5904e-11	4.84222e-07	0.00186225
			DE: Electricity grid mix 1kV-60kV ts				0.302955	0.301276	8.7954e-05	0.0877236	0.00116497	1.89359e-05	1.24228e-06	9.39931e-05	0.00705859	0.00488383	0.0234899	6.38326e-05	9.36452e-06	0.000560416	0.000317243	0.000315643	1.48737e-07	0.000281348	0.0986987
			DE: Tap water from groundwater ts				2.67929e-05	2.87944e-05	1.18098e-08	8.36959e-06	0.000290472	5.68728e-08	3.34576e-09	2.77978e-07	1.40077e-05	1.25899e-07	6.92644e-07	8.14632e-08	6.75185e-09	6.15192e-06	3.58986e-08	3.556e-08	2.00231e-11	2.99651e-08	7.50305e-06
		DE: X.04 - inhouse waste water treatment -rev4- (001) <LC>					0.84997	0.845022	0.000624981	0.245619	-0.0571154	0.00295819	0.00011599	0.0343422	0.556525	0.0342308	0.0533593	0.00507864	2.79799e-05	0.00298912	0.00130725	0.00129632	4.10076e-07	0.0018995	4.66027
			DE: [BLOCK] X.04 - inhouse waste water treatment -rev4- (001) <LC>				0.00362181	0.00360061	2.67472e-06	0.001042	-0.000257116	1.29396e-05	5.07346e-07	0.000150308	0.00243254	0.000148346	0.0002263	2.22009e-05	1.19387e-07	1.27682e-05	5.61871e-06	5.57165e-06	1.74684e-09	8.11156e-06	0.0203696
				DE: preparation of hydrogen chloride (36% in H2O) <Mfg>			6.83e-05	6.83056e-05	3.87813e-08	3.14498e-05	4.40134e-07	9.11584e-08	1.04208e-08	5.7841e-07	1.48235e-05	7.01579e-07	2.08003e-06	2.71207e-07	2.58704e-09	2.28519e-07	1.5525e-07	1.51765e-07	3.16472e-11	1.01463e-07	0.000263813
					DE: Hydrochloric acid mix (100%) ts		5.59881e-05	5.60038e-05	1.72273e-08	2.7166e-05	1.19653e-07	1.02913e-08	2.31952e-10	3.32864e-08	4.89181e-06	3.03661e-07	1.4738e-06	3.79625e-08	1.22351e-09	1.8703e-07	7.24432e-08	7.03004e-08	2.59948e-11	5.25043e-08	7.55241e-05
					GLO: market for water, ultrapure ecoinvent 3.5		1.23119e-05	1.23018e-05	2.1554e-08	4.28381e-06	3.20481e-07	8.08671e-08	1.01889e-08	5.45124e-07	9.93169e-06	3.97918e-07	6.06226e-07	2.33245e-07	1.36353e-09	4.14892e-08	8.28067e-08	8.14642e-08	5.65235e-12	4.89587e-08	0.000188289
				DE: Electricity grid mix 1kV-60kV ts			0.00207459	0.00206309	6.02297e-07	0.000600719	7.97755e-06	1.29671e-07	8.50699e-09	6.43652e-07	4.83362e-05	3.34438e-05	0.000160856	4.37117e-07	6.4127e-08	3.83765e-06	2.17243e-06	2.16148e-06	1.01853e-09	1.92663e-06	0.000675875
				DE: Sludge (acid/basic) ts			0.000438118	0.000437981	9.5581e-08	1.99742e-05	1.40328e-07	1.27734e-08	7.19739e-11	6.388e-07	0.000237893	2.17611e-07	1.11391e-06	2.57434e-06	9.41067e-10	1.56936e-06	6.92425e-07	6.91235e-07	1.95577e-10	3.05925e-07	0.0145726
				DE: Sodium hydroxide mix (50%) ts			0.000403843	0.000402535	1.75794e-07	0.000124883	1.75324e-06	3.18027e-08	1.71922e-09	1.45453e-07	1.14678e-05	4.81584e-06	2.36134e-05	9.12439e-08	1.30137e-08	1.20336e-06	7.11163e-07	7.05145e-07	1.63386e-10	5.20682e-07	0.000108126
				DE: Tap water from groundwater ts			-2.64528e-05	-2.8429e-05	-1.16599e-08	-8.26337e-06	-0.000286785	-5.6151e-08	-3.3033e-09	-2.7445e-07	-1.38299e-05	-1.24301e-07	-6.83854e-07	-8.04293e-08	-6.66616e-09	-6.07385e-06	-3.5443e-08	-3.51087e-08	-1.9769e-11	-2.95848e-08	-7.40783e-06
				EU-28: Compressed air ts			7.39207e-05	7.35514e-05	3.32654e-08	2.98012e-05	6.62126e-07	5.44442e-09	1.96178e-10	2.86195e-08	1.7072e-06	4.73771e-06	4.25878e-06	1.73264e-08	1.69417e-09	9.5768e-08	8.51625e-08	8.4615e-08	2.35052e-11	1.0613e-07	2.1712e-05
				GLO: market for iron(III) chloride, without water, in 14% iron solution state ecoinvent 3.5			0.000194565	0.000192392	4.68471e-07	7.77115e-05	3.83905e-06	4.53456e-06	1.78742e-07	1.67944e-05	0.000764877	4.1472e-05	8.95459e-06	6.55665e-06	1.40075e-08	1.92144e-06	5.95435e-07	5.87543e-07	1.64788e-10	1.05084e-06	0.00172253
				RER: market for aluminium sulfate, powder ecoinvent 3.5			0.000236564	0.00023633	8.42397e-07	0.00011528	7.02906e-06	5.421e-06	1.95778e-07	0.000120931	0.000828334	5.16394e-05	8.54202e-06	8.1638e-06	1.21361e-08	8.61022e-06	8.00919e-07	7.90135e-07	1.0815e-10	2.53859e-06	0.00171199
				RER: market for calcium chloride ecoinvent 3.5			0.000158354	0.000154851	4.29797e-07	5.04492e-05	7.82714e-06	2.76929e-06	1.15214e-07	1.08228e-05	0.000538934	1.14421e-05	1.75657e-05	4.16963e-06	1.75468e-08	1.37572e-06	4.4136e-07	4.34843e-07	6.10178e-11	1.59088e-06	0.00130033
			DE: preparation of hydrogen chloride (36% in H2O) <Mfg>				0.0155314	0.0155327	8.81886e-06	0.00715168	0.000100086	2.07294e-05	2.36969e-06	0.00013153	0.00337086	0.000159539	0.000472997	6.16725e-05	5.88293e-07	5.19653e-05	3.53038e-05	3.45113e-05	7.19657e-09	2.30727e-05	0.059991
				DE: Hydrochloric acid mix (100%) ts			0.0127317	0.0127353	3.91749e-06	0.00617754	2.72091e-05	2.34024e-06	5.27459e-08	7.56933e-06	0.0011124	6.90524e-05	0.000335142	8.63268e-06	2.78225e-07	4.25306e-05	1.64736e-05	1.59863e-05	5.91122e-09	1.19395e-05	0.0171742
				GLO: market for water, ultrapure ecoinvent 3.5			0.00279973	0.00279743	4.90137e-06	0.000974138	7.28774e-05	1.83892e-05	2.31695e-06	0.000123961	0.00225846	9.04865e-05	0.000137856	5.30398e-05	3.10067e-07	9.43464e-06	1.88302e-05	1.8525e-05	1.28534e-09	1.11332e-05	0.0428168
			DE: X.07 - acidic exhaust air washer -rev5- (001) <Mfg>				3.72661e-10	3.71071e-10	1.18576e-13	1.09253e-10	4.53547e-11	4.07979e-14	2.13653e-15	2.28331e-13	1.16473e-11	5.71506e-12	2.74493e-11	1.03931e-13	1.2503e-14	1.69559e-12	4.36902e-13	4.34266e-13	1.86219e-16	3.70609e-13	1.22249e-10
				DE: X.03 - ultrapure water system -rev4- (001) <Mfg>			5.33927e-11	5.34261e-11	1.67158e-14	1.55613e-11	4.40957e-11	1.98147e-14	8.17447e-16	1.26119e-13	3.88619e-12	8.33622e-13	3.90027e-12	3.56976e-14	2.55107e-15	1.03353e-12	5.74258e-14	5.70845e-14	3.49353e-17	5.12998e-14	2.19065e-11
					CH: ion-exchanger production for water treatment ecoinvent 3.5		5.29198e-13	5.30691e-13	7.59039e-16	1.61679e-13	5.06749e-15	8.16766e-15	1.11586e-16	6.896e-14	6.31695e-13	2.76368e-14	1.07604e-14	1.30999e-14	2.17065e-17	1.34067e-14	8.83814e-16	8.51387e-16	7.94361e-18	1.43776e-15	4.86954e-12
					DE: Electricity grid mix 1kV-60kV ts		4.8813e-11	4.85424e-11	1.41714e-14	1.41343e-11	1.87704e-13	3.05102e-15	2.00161e-16	1.51445e-14	1.1373e-12	7.86898e-13	3.78477e-12	1.02849e-14	1.50884e-15	9.02959e-14	5.11151e-14	5.08574e-14	2.3965e-17	4.53317e-14	1.59026e-11
					DE: Tap water from groundwater ts		4.04957e-12	4.35209e-12	1.78497e-15	1.26501e-12	4.39029e-11	8.59595e-15	5.0569e-16	4.20145e-14	2.11717e-12	1.90288e-14	1.04689e-13	1.23126e-14	1.0205e-15	9.29823e-13	5.42584e-15	5.37466e-15	3.02636e-18	4.52903e-15	1.13404e-12
					DE: X.03 - ultra pure water system -rev4- (001) ecoinvent 3.5 <u-so>		2.08927e-20	2.08927e-20	0	0	-1.27455e-22	0	7.44302e-21	0	0	0	0	0	1.08397e-21	0	0	0	0	0	0
					EU-28: Compressed air ts		9.04757e-16	9.00238e-16	4.07154e-19	3.64754e-16	8.10413e-18	6.66374e-20	2.40113e-21	3.5029e-19	2.08954e-17	5.79875e-17	5.21257e-17	2.12067e-19	2.0736e-20	1.17216e-18	1.04235e-18	1.03565e-18	2.87694e-22	1.29899e-18	2.65745e-16
				DE: Electricity grid mix 1kV-60kV ts			2.56018e-10	2.54598e-10	7.43271e-14	7.41324e-11	9.84478e-13	1.60021e-14	1.04981e-15	7.94306e-14	5.96498e-12	4.12717e-12	1.98506e-11	5.39428e-14	7.91366e-15	4.73589e-13	2.68091e-13	2.6674e-13	1.25693e-16	2.37758e-13	8.34071e-11
				DE: Sodium hydroxide mix (50%) ts			6.3251e-11	6.30462e-11	2.75333e-14	1.95595e-11	2.74596e-13	4.98103e-15	2.69269e-16	2.27812e-14	1.79611e-12	7.5427e-13	3.6984e-12	1.42909e-14	2.03824e-15	1.88473e-13	1.11384e-13	1.10442e-13	2.559e-17	8.15506e-14	1.6935e-11
			DE: X.08 - caustic exhaust air washer -rev4- (001) <Mfg>				0.0185362	0.0184526	1.28512e-05	0.00640532	0.00159379	2.53075e-06	9.52972e-08	1.05227e-05	0.000833954	0.000280714	0.00134564	7.07191e-06	5.81661e-07	6.50794e-05	1.95248e-05	1.93695e-05	9.03023e-09	4.29083e-05	0.006482
				DE: X.03 - ultrapure water system -rev4- (001) <Mfg>			0.00185398	0.00185514	5.80432e-07	0.000540344	0.00153115	6.88034e-07	2.83846e-08	4.3793e-06	0.000134942	2.89462e-05	0.000135431	1.23955e-06	8.85819e-08	3.58876e-05	1.99402e-06	1.98217e-06	1.21307e-09	1.78131e-06	0.000760668
					CH: ion-exchanger production for water treatment ecoinvent 3.5		1.83756e-05	1.84274e-05	2.63564e-08	5.61406e-06	1.75961e-07	2.83609e-07	3.87466e-09	2.39453e-06	2.19346e-05	9.59647e-07	3.73638e-07	4.54874e-07	7.53724e-10	4.65527e-07	3.06891e-08	2.95631e-08	2.7583e-10	4.99239e-08	0.000169087
					DE: Electricity grid mix 1kV-60kV ts		0.00169496	0.00168556	4.92081e-07	0.000490791	6.51771e-06	1.05942e-07	6.95026e-09	5.25868e-07	3.9491e-05	2.73238e-05	0.00013142	3.57127e-07	5.23922e-08	3.13539e-06	1.77489e-06	1.76595e-06	8.32149e-10	1.57407e-06	0.000552194
					DE: Tap water from groundwater ts		0.000140615	0.00015112	6.19804e-08	4.39255e-05	0.00152446	2.98481e-07	1.75593e-08	1.45889e-06	7.35156e-05	6.60747e-07	3.63515e-06	4.27537e-07	3.54352e-08	3.22867e-05	1.88404e-07	1.86627e-07	1.05086e-10	1.57264e-07	3.93777e-05
					DE: X.03 - ultra pure water system -rev4- (001) ecoinvent 3.5 <u-so>		7.25467e-13	7.25467e-13	0	0	-4.42569e-15	0	2.58447e-13	0	0	0	0	0	3.76393e-14	0	0	0	0	0	0
					EU-28: Compressed air ts		3.14163e-08	3.12594e-08	1.41378e-11	1.26655e-08	2.81403e-10	2.31388e-12	8.33756e-14	1.21633e-11	7.25559e-10	2.01353e-09	1.80998e-09	7.36371e-12	7.20024e-13	4.07014e-11	3.6194e-11	3.59614e-11	9.98972e-15	4.51054e-11	9.22758e-09
				DE: Electricity grid mix 1kV-60kV ts			0.0151828	0.0150987	4.40789e-06	0.00439634	5.83834e-05	9.48989e-07	6.2258e-08	4.71054e-06	0.000353747	0.000244757	0.00117722	3.19902e-06	4.6931e-07	2.80857e-05	1.58989e-05	1.58187e-05	7.45409e-09	1.41e-05	0.00494636
				DE: Sulphuric acid (96%) ts			0.00149937	0.00149875	7.86291e-06	0.00146864	4.25527e-06	8.93723e-07	4.65463e-09	1.43287e-06	0.000345265	7.01059e-06	3.29973e-05	2.63335e-06	2.37686e-08	1.10605e-06	1.63189e-06	1.56859e-06	3.63057e-10	2.7027e-05	0.000774971
			DE: X.09.oe3 - Process exhaust ventilators -rev4- (001) <LC>				0.00263325	0.00261865	7.64485e-07	0.000762482	1.01258e-05	1.64589e-07	1.07978e-08	8.16977e-07	6.13523e-05	4.24497e-05	0.000204172	5.54825e-07	8.13953e-08	4.87106e-06	2.75743e-06	2.74353e-06	1.29281e-09	2.44544e-06	0.000857876
				DE: Electricity grid mix 1kV-60kV ts			0.00263325	0.00261865	7.64485e-07	0.000762482	1.01258e-05	1.64589e-07	1.07978e-08	8.16977e-07	6.13523e-05	4.24497e-05	0.000204172	5.54825e-07	8.13953e-08	4.87106e-06	2.75743e-06	2.74353e-06	1.29281e-09	2.44544e-06	0.000857876
			DE: X.09.oe4 - Process exhaust ventilators -rev4- (001) <LC>				0.00157995	0.00157119	4.58691e-07	0.000457489	6.07546e-06	9.87533e-08	6.47866e-09	4.90186e-07	3.68114e-05	2.54698e-05	0.000122503	3.32895e-07	4.88372e-08	2.92264e-06	1.65446e-06	1.64612e-06	7.75684e-10	1.46727e-06	0.000514726
				DE: Electricity grid mix 1kV-60kV ts			0.00157995	0.00157119	4.58691e-07	0.000457489	6.07546e-06	9.87533e-08	6.47866e-09	4.90186e-07	3.68114e-05	2.54698e-05	0.000122503	3.32895e-07	4.88372e-08	2.92264e-06	1.65446e-06	1.64612e-06	7.75684e-10	1.46727e-06	0.000514726
			DE: Electricity grid mix 1kV-60kV ts				0.471763	0.469147	0.000136962	0.136603	0.00181409	2.94871e-05	1.93449e-06	0.000146366	0.0109917	0.00760512	0.0365786	9.94003e-05	1.45825e-05	0.000872681	0.000494011	0.000491521	2.31614e-07	0.000438116	0.153694
			DE: Sludge (acid/basic) ts				0.0996281	0.0995967	2.17351e-05	0.00454214	3.19106e-05	2.90467e-06	1.63669e-08	0.000145263	0.0540969	4.94848e-05	0.000253303	0.000585404	2.13999e-07	0.000356872	0.000157457	0.000157187	4.44741e-08	6.95672e-05	3.31381
			DE: Sodium hydroxide mix (50%) ts				0.091834	0.0915365	3.99755e-05	0.0283984	0.000398686	7.23193e-06	3.9095e-07	3.3076e-05	0.00260777	0.00109512	0.00536969	2.07488e-05	2.95932e-06	0.000273643	0.000161718	0.00016035	3.7154e-08	0.000118403	0.0245878
			DE: Tap water from groundwater ts				-0.00601537	-0.00646475	-2.65146e-06	-0.00187909	-0.0652149	-1.27687e-05	-7.5117e-07	-6.24098e-05	-0.00314493	-2.82661e-05	-0.000155508	-1.82896e-05	-1.51589e-06	-0.00138119	-8.05974e-06	-7.98371e-06	-4.49546e-09	-6.72758e-06	-0.00168454
			EU-28: Compressed air ts				0.0168095	0.0167256	7.56455e-06	0.00677679	0.000150567	1.23806e-06	4.46108e-08	6.50807e-06	0.000388217	0.00107736	0.000968447	3.94002e-06	3.85255e-07	2.17776e-05	1.93659e-05	1.92414e-05	5.34508e-09	2.4134e-05	0.0049373
			GLO: market for iron(III) chloride, without water, in 14% iron solution state ecoinvent 3.5				0.0442441	0.0437498	0.00010653	0.0176716	0.000873	0.00103116	4.06459e-05	0.00381904	0.173933	0.00943073	0.00203627	0.00149098	3.1853e-06	0.000436935	0.000135402	0.000133607	3.74729e-08	0.00023896	0.391703
			RER: market for aluminium sulfate, powder ecoinvent 3.5				0.0537947	0.0537415	0.000191561	0.0262147	0.00159841	0.00123274	4.45199e-05	0.0274996	0.188363	0.0117428	0.00194245	0.00185645	2.75976e-06	0.00195796	0.000182129	0.000179677	2.45934e-08	0.000577276	0.389307
			RER: market for calcium chloride ecoinvent 3.5				0.0360096	0.0352131	9.77359e-05	0.0114721	0.00177989	0.000629737	2.61997e-05	0.00246111	0.122553	0.00260193	0.00399444	0.000948174	3.99014e-06	0.000312838	0.000100365	9.88832e-05	1.38754e-08	0.000361765	0.295695
		DE: X.07 - acidic exhaust air washer -rev5- (001) <Mfg>					3.36121e-09	3.34687e-09	1.0695e-12	9.85408e-10	4.09077e-10	3.67976e-13	1.92704e-14	2.05943e-12	1.05053e-10	5.15469e-11	2.47578e-10	9.37407e-13	1.1277e-13	1.52933e-11	3.94063e-12	3.91686e-12	1.6796e-15	3.3427e-12	1.10262e-09
			DE: X.03 - ultrapure water system -rev4- (001) <Mfg>				4.81575e-10	4.81876e-10	1.50768e-13	1.40355e-10	3.9772e-10	1.78718e-13	7.37295e-15	1.13753e-12	3.50514e-11	7.51884e-12	3.51784e-11	3.21974e-13	2.30093e-14	9.32188e-12	5.17951e-13	5.14873e-13	3.15098e-16	4.62698e-13	1.97585e-10
				CH: ion-exchanger production for water treatment ecoinvent 3.5			4.77309e-12	4.78656e-12	6.84614e-15	1.45826e-12	4.57061e-14	7.36681e-14	1.00645e-15	6.21984e-13	5.69756e-12	2.4927e-13	9.70533e-14	1.18154e-13	1.95781e-16	1.20922e-13	7.97155e-15	7.67908e-15	7.16473e-17	1.29678e-14	4.39207e-11
				DE: Electricity grid mix 1kV-60kV ts			4.40269e-10	4.37828e-10	1.27819e-13	1.27484e-10	1.69299e-12	2.75186e-14	1.80535e-15	1.36595e-13	1.02579e-11	7.09742e-12	3.41367e-11	9.27645e-14	1.3609e-14	8.14423e-13	4.61032e-13	4.58708e-13	2.16152e-16	4.08869e-13	1.43434e-10
				DE: Tap water from groundwater ts			3.6525e-11	3.92536e-11	1.60995e-14	1.14097e-11	3.95982e-10	7.7531e-14	4.56107e-15	3.78949e-13	1.90958e-11	1.7163e-13	9.44238e-13	1.11054e-13	9.20438e-15	8.38653e-12	4.89383e-14	4.84767e-14	2.72962e-17	4.08495e-14	1.02284e-11
				DE: X.03 - ultra pure water system -rev4- (001) ecoinvent 3.5 <u-so>			1.88441e-19	1.88441e-19	0	0	-1.14958e-21	0	6.71323e-20	0	0	0	0	0	9.77689e-21	0	0	0	0	0	0
				EU-28: Compressed air ts			8.16044e-15	8.11968e-15	3.67232e-18	3.28989e-15	7.30951e-17	6.01035e-19	2.1657e-20	3.15944e-18	1.88466e-16	5.23018e-16	4.70147e-16	1.91274e-18	1.87028e-19	1.05723e-17	9.40148e-18	9.34104e-18	2.59485e-21	1.17162e-17	2.39688e-15
			DE: Electricity grid mix 1kV-60kV ts				2.30915e-09	2.29635e-09	6.70392e-13	6.68636e-10	8.87949e-12	1.44331e-13	9.46878e-15	7.16423e-13	5.38011e-11	3.7225e-11	1.79042e-10	4.86537e-13	7.13771e-14	4.27153e-12	2.41805e-12	2.40586e-12	1.13369e-15	2.14446e-12	7.52289e-10
			DE: Sodium hydroxide mix (50%) ts				5.70492e-10	5.68644e-10	2.48336e-13	1.76417e-10	2.47672e-12	4.49263e-14	2.42867e-15	2.05475e-13	1.62e-11	6.80313e-12	3.33577e-11	1.28896e-13	1.83839e-14	1.69993e-12	1.00463e-12	9.96127e-13	2.30809e-16	7.35545e-13	1.52745e-10
		DE: X.08 - caustic exhaust air washer -rev4- (001) <Mfg>					0.261444	0.260265	0.000181261	0.0903442	0.0224797	3.5695e-05	1.34412e-06	0.000148418	0.0117625	0.00395934	0.0189797	9.97461e-05	8.20406e-06	0.000917915	0.000275388	0.000273198	1.27367e-07	0.000605202	0.0914257
			DE: X.03 - ultrapure water system -rev4- (001) <Mfg>				0.0261495	0.0261659	8.18673e-06	0.0076213	0.0215962	9.70441e-06	4.00352e-07	6.1768e-05	0.0019033	0.000408273	0.00191019	1.74832e-05	1.24941e-06	0.000506179	2.81248e-05	2.79576e-05	1.71099e-08	2.51245e-05	0.0107289
				CH: ion-exchanger production for water treatment ecoinvent 3.5			0.000259179	0.00025991	3.71746e-07	7.91837e-05	2.48184e-06	4.00018e-06	5.46504e-08	3.37738e-05	0.000309378	1.35354e-05	5.27e-06	6.41579e-06	1.06309e-08	6.56605e-06	4.32856e-07	4.16974e-07	3.89045e-09	7.04155e-07	0.0023849
				DE: Electricity grid mix 1kV-60kV ts			0.0239066	0.0237741	6.94058e-06	0.00692239	9.19294e-05	1.49426e-06	9.80303e-08	7.41713e-06	0.000557003	0.00038539	0.00185362	5.03712e-06	7.38968e-07	4.42232e-05	2.50341e-05	2.49079e-05	1.17371e-08	2.22016e-05	0.00778845
				DE: Tap water from groundwater ts			0.00198331	0.00213147	8.74206e-07	0.000619549	0.0215018	4.20994e-06	2.47666e-07	2.0577e-05	0.0010369	9.31953e-06	5.12722e-05	6.03022e-06	4.99798e-07	0.000455389	2.65735e-06	2.63229e-06	1.48219e-09	2.21813e-06	0.000555405
				DE: X.03 - ultra pure water system -rev4- (001) ecoinvent 3.5 <u-so>			1.02324e-11	1.02324e-11	0	0	-6.24224e-14	0	3.64529e-12	0	0	0	0	0	5.30885e-13	0	0	0	0	0	0
				EU-28: Compressed air ts			4.43112e-07	4.40899e-07	1.99407e-10	1.78641e-07	3.96907e-09	3.26362e-11	1.17597e-12	1.71558e-10	1.02337e-08	2.83999e-08	2.5529e-08	1.03862e-10	1.01556e-11	5.74075e-10	5.10501e-10	5.07219e-10	1.409e-13	6.36191e-10	1.30151e-07
			DE: Electricity grid mix 1kV-60kV ts				0.214147	0.21296	6.21712e-05	0.0620083	0.000823471	1.33851e-05	8.78121e-07	6.644e-05	0.00498944	0.00345219	0.0166041	4.51207e-05	6.61941e-06	0.000396136	0.000224246	0.000223116	1.05137e-07	0.000198874	0.0697662
			DE: Sulphuric acid (96%) ts				0.021148	0.0211392	0.000110903	0.0207145	6.00186e-05	1.26056e-05	6.56515e-08	2.021e-05	0.00486981	9.88811e-05	0.000465412	3.71422e-05	3.35245e-07	1.56004e-05	2.30171e-05	2.21242e-05	5.12075e-09	0.000381203	0.0109306
		DE: X.09.oe1 - Process exhaust ventilators -rev4- (001) <LC>					0.0262722	0.0261266	7.62736e-06	0.00760737	0.000101026	1.64212e-06	1.07731e-07	8.15107e-06	0.000612119	0.000423525	0.00203704	5.53555e-06	8.1209e-07	4.85991e-05	2.75112e-05	2.73725e-05	1.28985e-08	2.43985e-05	0.00855913
			DE: Electricity grid mix 1kV-60kV ts				0.0262722	0.0261266	7.62736e-06	0.00760737	0.000101026	1.64212e-06	1.07731e-07	8.15107e-06	0.000612119	0.000423525	0.00203704	5.53555e-06	8.1209e-07	4.85991e-05	2.75112e-05	2.73725e-05	1.28985e-08	2.43985e-05	0.00855913
		DE: X.09.oe3 - Process exhaust ventilators -rev4- (001) <LC>					0.0237505	0.0236189	6.89527e-06	0.0068772	9.13293e-05	1.48451e-06	9.73904e-08	7.36871e-06	0.000553367	0.000382874	0.00184152	5.00423e-06	7.34143e-07	4.39345e-05	2.48706e-05	2.47453e-05	1.16605e-08	2.20566e-05	0.00773761
			DE: Electricity grid mix 1kV-60kV ts				0.0237505	0.0236189	6.89527e-06	0.0068772	9.13293e-05	1.48451e-06	9.73904e-08	7.36871e-06	0.000553367	0.000382874	0.00184152	5.00423e-06	7.34143e-07	4.39345e-05	2.48706e-05	2.47453e-05	1.16605e-08	2.20566e-05	0.00773761
		DE: X.09.oe4 - Process exhaust ventilators -rev4- (001) <LC>					0.0222845	0.0221609	6.46963e-06	0.00645268	8.56917e-05	1.39287e-06	9.13786e-08	6.91385e-06	0.000519208	0.00035924	0.00172785	4.69533e-06	6.88826e-07	4.12225e-05	2.33354e-05	2.32178e-05	1.09407e-08	2.06951e-05	0.00725998
			DE: Electricity grid mix 1kV-60kV ts				0.0222845	0.0221609	6.46963e-06	0.00645268	8.56917e-05	1.39287e-06	9.13786e-08	6.91385e-06	0.000519208	0.00035924	0.00172785	4.69533e-06	6.88826e-07	4.12225e-05	2.33354e-05	2.32178e-05	1.09407e-08	2.06951e-05	0.00725998
		DE: X.09.oe5 - Process exhaust ventilators -rev4- (001) <LC>					0.0146608	0.0145796	4.25634e-06	0.00424519	5.63761e-05	9.16362e-07	6.01175e-08	4.54859e-06	0.000341584	0.000236342	0.00113674	3.08903e-06	4.53175e-07	2.71201e-05	1.53522e-05	1.52749e-05	7.19781e-09	1.36152e-05	0.0047763
			DE: Electricity grid mix 1kV-60kV ts				0.0146608	0.0145796	4.25634e-06	0.00424519	5.63761e-05	9.16362e-07	6.01175e-08	4.54859e-06	0.000341584	0.000236342	0.00113674	3.08903e-06	4.53175e-07	2.71201e-05	1.53522e-05	1.52749e-05	7.19781e-09	1.36152e-05	0.0047763
		DE: X.09.oe6 - Process exhaust ventilators -rev4- (001) <LC>					0.0114354	0.0113721	3.31994e-06	0.00331124	4.39734e-05	7.14762e-07	4.68917e-08	3.5479e-06	0.000266436	0.000184347	0.000886659	2.40945e-06	3.53476e-07	2.11536e-05	1.19747e-05	1.19144e-05	5.6143e-09	1.06199e-05	0.00372551
			DE: Electricity grid mix 1kV-60kV ts				0.0114354	0.0113721	3.31994e-06	0.00331124	4.39734e-05	7.14762e-07	4.68917e-08	3.5479e-06	0.000266436	0.000184347	0.000886659	2.40945e-06	3.53476e-07	2.11536e-05	1.19747e-05	1.19144e-05	5.6143e-09	1.06199e-05	0.00372551
		DE: X.09.oe7 - Process exhaust ventilators -rev4- (001) <LC>					5.2779e-05	5.24864e-05	1.53228e-08	1.52827e-05	2.02954e-07	3.2989e-09	2.16423e-10	1.63749e-08	1.2297e-06	8.50832e-07	4.09227e-06	1.11205e-08	1.63143e-09	9.76322e-08	5.52681e-08	5.49895e-08	2.59121e-11	4.90148e-08	1.71947e-05
			DE: Electricity grid mix 1kV-60kV ts				5.2779e-05	5.24864e-05	1.53228e-08	1.52827e-05	2.02954e-07	3.2989e-09	2.16423e-10	1.63749e-08	1.2297e-06	8.50832e-07	4.09227e-06	1.11205e-08	1.63143e-09	9.76322e-08	5.52681e-08	5.49895e-08	2.59121e-11	4.90148e-08	1.71947e-05
		DE: X.10 - general exhausts to air filter <LC>					0.000362266	0.000360736	1.20582e-06	0.000127911	3.26054e-06	7.40951e-06	2.31449e-07	6.68695e-05	0.00123455	2.60778e-05	8.90755e-06	1.29405e-05	2.60151e-08	1.14089e-05	1.0153e-06	9.78038e-07	1.31164e-10	5.12996e-06	0.00503205
			GLO: market for air filter, central unit, 600 m3/h ecoinvent 3.5				0.000357025	0.000355495	1.2036e-06	0.000127708	3.25826e-06	7.26894e-06	2.31334e-07	6.68177e-05	0.00122696	2.60499e-05	8.86837e-06	1.27356e-05	1.42143e-08	1.14074e-05	1.00229e-06	9.66068e-07	1.28855e-10	5.12503e-06	0.00499633
			RoW: treatment of used air filter, central unit, 600 m3/h ecoinvent 3.5				5.2408e-06	5.24088e-06	2.2159e-09	2.02864e-07	2.27676e-09	1.40574e-07	1.14723e-10	5.18312e-08	7.59683e-06	2.78709e-08	3.91788e-08	2.04912e-07	1.18008e-08	1.48252e-09	1.30118e-08	1.197e-08	2.30929e-12	4.92723e-09	3.57287e-05
		DE: Hazardous waste (statistical average) (no C, worst case scenario incl. landfill) ts					-0.000368961	-0.00036735	-3.42987e-07	-8.96843e-05	-9.76466e-07	-6.61701e-08	-6.74345e-10	-2.47291e-06	-0.00091679	-2.18429e-06	-1.21154e-05	-9.8934e-06	-6.34956e-09	-1.33731e-05	-1.95665e-06	-1.95131e-06	-3.71185e-10	-1.0776e-06	-0.0557285
		DE: Municipal waste water treatment (mix) ts					0.707769	1.08373	0.000240257	0.0968156	-0.969031	0.0100091	0.000602336	0.0496657	2.41305	0.00405089	0.0213095	0.013723	0.00118363	-0.0029746	0.00087344	0.000869707	2.80944e-06	0.000746741	0.226
		DE: Municipal waste water treatment (mix) ts					0.110504	0.169203	3.75112e-05	0.0151158	-0.151294	0.00156271	9.40426e-05	0.00775429	0.376749	0.000632464	0.00332705	0.00214257	0.000184799	-0.000464423	0.00013637	0.000135787	4.38637e-07	0.000116588	0.0352853
		DE: treatment of waste, from silicon wafer production, underground deposit ecoinvent 3.5					-0.00121316	-0.000931193	-2.43623e-06	-0.000371632	-8.07821e-06	-9.02484e-06	-5.65797e-07	-0.000181546	-0.000868056	-2.38597e-05	-0.000235491	-1.35579e-05	-3.90383e-08	-5.198e-05	-3.498e-06	-3.26625e-06	-2.92226e-10	-4.17947e-06	-0.00296098
		DE: X.12 - exhaust (VOC) to air -rev4- (001) <u-so>					0	0	0	0	0	6.58128e-07	0	0	0	0	0	8.67361e-08	0	0	0	0	0	0	0.00300319
	DE: C - module production (007) <Mfg>						94.2366	91.5531	0.104184	28.806	0.619367	0.150563	0.0052736	0.564501	22.6706	2.28777	6.99673	0.293144	0.002588	0.727864	0.204606	0.202613	2.89061e-05	0.308029	188.127
		DE: C.01 - module assembly (007) <Mfg>					92.6874	92.4739	0.101748	28.2112	0.605995	0.130042	0.00457388	0.497547	20.7918	2.14632	4.73675	0.26247	0.00218835	0.7236	0.199129	0.197323	2.73365e-05	0.30268	180.873
			DE: cell fixation tape (generic tape) <Mfg>				0.111076	0.0999153	6.0027e-05	0.0464956	0.0150012	8.98131e-05	1.38764e-05	6.79481e-05	-0.00963549	0.00110425	0.0812523	0.000147203	6.61895e-05	0.00040304	0.000246863	0.00024131	2.31929e-07	0.000189341	0.0549536
				DE: Elastomer joint tape, polyurethane (EN15804 A1-A3) ts			0.0453485	0.0452723	2.17678e-05	0.0215382	0.00029498	1.05005e-05	3.37471e-07	3.35349e-05	0.00508017	0.000376126	0.00198352	2.72874e-05	1.79355e-06	0.00014031	7.75474e-05	7.48877e-05	3.3397e-08	6.67732e-05	0.0139723
				DE: Joint sealing tape fabric tape (EN15804 A1-A3) ts			0.0657277	0.054643	3.82592e-05	0.0249575	0.0147062	7.93126e-05	1.35389e-05	3.44132e-05	-0.0147157	0.000728119	0.0792688	0.000119915	6.4396e-05	0.00026273	0.000169316	0.000166423	1.98532e-07	0.000122568	0.0409814
			DE: copper smartwires (SWCT wires) <Mfg>				0.71046	0.708002	0.00107884	0.193434	0.00992246	0.00217269	1.64522e-06	0.000734842	0.87416	0.00379276	0.983794	0.028466	1.37237e-05	0.274776	0.00146167	0.00145417	6.16118e-07	0.00336264	56.8784
				DE: Copper mix (99,999% from electrolysis) ts			0.585926	0.584169	0.00104271	0.157391	0.00944445	0.00216492	1.13547e-06	0.0006963	0.87126	0.00179404	0.974147	0.0284398	9.88068e-06	0.274546	0.00133128	0.00132443	5.55072e-07	0.00324707	56.8378
				DE: District heating mix (EN15804 B6) ts			0.000557493	0.00054378	1.36419e-07	0.000144655	1.27592e-06	2.07644e-08	1.37318e-09	7.80217e-08	1.18973e-05	1.42907e-07	3.48162e-05	8.96631e-08	1.08847e-08	6.72329e-07	5.73862e-07	5.70195e-07	1.79321e-10	4.34544e-07	0.000141212
				DE: Electricity grid mix 1kV-60kV ts			0.123976	0.123289	3.59928e-05	0.0358985	0.000476732	7.74902e-06	5.08371e-07	3.84641e-05	0.00288853	0.00199858	0.00961262	2.61217e-05	3.83218e-06	0.000229335	0.000129823	0.000129169	6.08668e-08	0.000115134	0.0403898
			DE: interconnection ribbon (copper wires) <Mfg>				0.323114	0.322071	0.000533008	0.0873815	0.00486191	0.00109143	6.86948e-07	0.000359196	0.439187	0.0013556	0.492501	0.0143205	5.84349e-06	0.138239	0.000699598	0.000696005	2.93207e-07	0.00166052	28.6173
				DE: Copper mix (99,999% from electrolysis) ts			0.294914	0.294029	0.000524827	0.0792196	0.00475367	0.00108967	5.71517e-07	0.000350468	0.43853	0.000902995	0.490316	0.0143146	4.97323e-06	0.138187	0.00067007	0.000666626	2.79384e-07	0.00163435	28.6081
				DE: District heating mix (EN15804 B6) ts			0.000126243	0.000123138	3.08917e-08	3.27567e-05	2.8893e-07	4.70206e-09	3.10953e-10	1.76678e-08	2.69412e-06	3.2361e-08	7.88404e-06	2.0304e-08	2.46481e-09	1.52247e-07	1.2995e-07	1.29119e-07	4.06069e-11	9.84015e-08	3.19771e-05
				DE: Electricity grid mix 1kV-60kV ts			0.0280743	0.0279187	8.15055e-06	0.0081292	0.000107956	1.75476e-06	1.1512e-07	8.71019e-06	0.000654107	0.000452577	0.00217677	5.91526e-06	8.67795e-07	5.19328e-05	2.93983e-05	2.92501e-05	1.37833e-08	2.60721e-05	0.00914624
			DE: j-box set (3 junction boxes) <Mfg>				2.04689	2.01823	0.00263366	1.19145	0.0244253	0.0163149	0.000693925	0.0740107	1.74824	0.232741	0.0594503	0.0234649	5.56352e-05	0.00385155	0.00431359	0.00409912	5.09302e-07	0.00673563	4.52996
				GLO: market for polyethylene terephthalate, granulate, amorphous ecoinvent 3.5			1.19255	1.19144	0.00162386	0.656018	0.0134586	0.00904869	0.000320723	0.0436304	1.17228	0.0533417	0.0183783	0.0136435	2.38576e-05	0.00246619	0.00261321	0.00249546	2.45871e-07	0.00373406	3.75366
				GLO: market for polyethylene, high density, granulate ecoinvent 3.5			0.123118	0.123811	0.00010588	0.0971349	0.000719877	0.000334094	2.16176e-06	0.0026242	0.0118409	0.000141228	0.00023194	0.000500402	2.96234e-07	1.37738e-05	0.000287063	0.000259131	2.33308e-09	0.000320597	0.0838079
				GLO: market for polypropylene, granulate ecoinvent 3.5			0.203272	0.204034	0.000164564	0.154697	0.00147206	0.000471426	6.96876e-06	0.0036057	0.017539	0.000212535	0.00037265	0.000717004	1.21822e-06	2.2767e-05	0.000455473	0.000417097	3.67038e-09	0.00049887	0.136403
				RER: injection moulding ecoinvent 3.5			0.527952	0.498937	0.00073936	0.283603	0.0087748	0.00646064	0.000364072	0.0241504	0.546582	0.179046	0.0404674	0.00860408	3.02631e-05	0.00134882	0.000957843	0.000927429	2.57428e-07	0.0021821	0.556089
			DE: Aluminium frame profile, powder coated (EN15804 A1-A3) ts				40.4025	40.4461	0.0303987	12.6978	0.300426	0.00706006	0.000143993	0.0308498	1.74347	0.995669	0.796087	0.0182623	0.00079468	0.203155	0.0605267	0.0601035	8.63738e-06	0.0948139	10.0238
			DE: Electricity grid mix 1kV-60kV ts				23.5649	23.4342	0.00684136	6.82343	0.0906153	0.0014729	9.6629e-05	0.0073111	0.54904	0.379881	1.82713	0.00496511	0.000728404	0.043591	0.0246762	0.0245518	1.15693e-05	0.0218842	7.67711
			DE: Hazardous waste (statistical average) (no C, worst case scenario incl. landfill) ts				-5.67632e-05	-5.65155e-05	-5.27672e-08	-1.37976e-05	-1.50226e-07	-1.018e-08	-1.03745e-10	-3.80448e-07	-0.000141045	-3.36045e-07	-1.86391e-06	-1.52206e-06	-9.76855e-10	-2.0574e-06	-3.01023e-07	-3.00201e-07	-5.71053e-11	-1.65785e-07	-0.00857361
			DE: Municipal waste water treatment (mix) ts				0.00330842	0.00506584	1.12307e-06	0.000452559	-0.00452968	4.67869e-05	2.81559e-06	0.00023216	0.0112797	1.89357e-05	9.96102e-05	6.41475e-05	5.5328e-06	-1.39046e-05	4.08285e-06	4.0654e-06	1.31326e-08	3.4906e-06	0.00105643
			DE: Sealants based on silicone - Deutsche Bauchemie e.V. (DBC) (A5) ts-EPD <p-agg>				0.000374502	0.000459942	7.22616e-09	1.6769e-06	1.03166e-06	2.06467e-10	4.41259e-12	8.64345e-10	1.31682e-07	5.93137e-08	3.24267e-08	1.95511e-09	9.38198e-11	2.44083e-08	1.06405e-05	6.61716e-06	1.98257e-12	3.32652e-08	1.33199e-06
			DE: Tap water from groundwater ts				0.00168015	0.00180567	7.40579e-07	0.000524849	0.0182152	3.56643e-06	2.09809e-07	1.74317e-05	0.000878409	7.895e-06	4.3435e-05	5.10847e-06	4.23402e-07	0.000385781	2.25116e-06	2.22993e-06	1.25563e-09	1.87908e-06	0.000470508
			DE: Tap water from groundwater ts				-0.00126011	-0.00135425	-5.55435e-07	-0.000393636	-0.0136614	-2.67482e-06	-1.57357e-07	-1.30738e-05	-0.000658807	-5.92125e-06	-3.25763e-05	-3.83135e-06	-3.17551e-07	-0.000289335	-1.68837e-06	-1.67245e-06	-9.4172e-10	-1.40931e-06	-0.000352881
			DE: treatment of waste, from silicon wafer production, underground deposit ecoinvent 3.5				-0.000186641	-0.00014326	-3.74805e-07	-5.71742e-05	-1.2428e-06	-1.38844e-06	-8.70458e-08	-2.79301e-05	-0.000133547	-3.67073e-06	-3.62294e-05	-2.08583e-06	-6.00589e-09	-7.99692e-06	-5.38154e-07	-5.025e-07	-4.49579e-11	-6.42996e-07	-0.000455536
			EU-25: Copper wire; technology mix; market mix, at plant; cross section 1 mm ECI/ELCD				0.127049	0.126356	0.00019152	0.0399507	0.00295382	9.13795e-05	2.83009e-07	0.000209321	0.0507749	0.0052535	0	0.000189634	9.04266e-07	0.0173937	0.000282838	0.000281444	6.25762e-08	0.000568329	0.225545
			EU-28: Compressed air ts				0.00214779	0.00213707	9.6654e-07	0.000865886	1.92383e-05	1.5819e-07	5.70002e-09	8.31551e-07	4.96033e-05	0.000137656	0.000123741	5.03425e-07	4.92249e-08	2.78258e-06	2.47443e-06	2.45852e-06	6.82953e-10	3.08366e-06	0.00063085
			GLO: market for electronics scrap ecoinvent 3.5				-0.000353558	-0.000353432	-6.62828e-07	-0.000125189	-1.15791e-06	-2.09723e-06	-4.26564e-08	-1.08886e-05	-0.000267046	-9.13638e-06	-1.71134e-05	-7.06068e-06	-4.06722e-09	-9.10809e-07	-2.37088e-06	-2.3327e-06	-1.61511e-10	-1.62768e-06	-0.00630494
			GLO: market for packaging film, low density polyethylene ecoinvent 3.5				0.0814989	0.0795065	9.22062e-05	0.0547561	0.00108744	0.000406545	9.97423e-06	0.00247203	0.0246128	0.00303057	0.00223387	0.00058467	1.61149e-06	3.46388e-05	0.000200661	0.000185096	8.3745e-09	0.000251051	0.0909689
			GLO: market for solar glass, low-iron ecoinvent 3.5				25.2912	25.2088	0.0598985	7.06705	0.156427	0.100564	0.00360716	0.38073	15.3513	0.522373	0.493824	0.17108	0.000515353	0.0420598	0.106671	0.105666	5.38922e-06	0.173162	72.7476
			RER: market for ethylene vinyl acetate copolymer ecoinvent 3.5				0.00684172	0.00682761	6.70685e-06	0.00528441	0.000113388	3.91886e-05	1.39711e-06	0.000166051	0.0051187	0.000383976	8.60118e-05	5.65941e-05	1.33292e-07	1.14914e-05	1.37666e-05	1.27953e-05	1.16695e-09	1.7635e-05	0.0116846
			RER: market for silicone product ecoinvent 3.5				0.00230841	0.00234487	3.35504e-06	0.000986033	9.15756e-05	1.87349e-05	7.766e-07	7.19733e-05	0.00207836	0.000220413	8.26448e-05	2.6171e-05	1.30761e-07	3.62935e-06	5.31019e-06	5.14344e-06	2.10122e-09	8.14451e-06	0.00359785
			RoW: treatment of electronics scrap, metals recovery in copper smelter ecoinvent 3.5				0.0139903	0.014002	8.71844e-06	0.001967	2.7568e-05	0.00067543	7.86279e-07	0.000365281	0.00241936	0.000372337	0.00013881	0.000852216	6.48843e-08	6.57185e-06	1.65617e-05	1.62335e-05	1.97217e-09	2.19081e-05	0.0253689
		DE: C.02 - module packaging (007) <Mfg>					1.54914	-0.920828	0.00243584	0.59474	0.0133719	0.0205208	0.000699723	0.0669542	1.88	0.141	2.26	0.0307	0.0004	0.00426	0.00548	0.00529	1.57e-06	0.00535	7.25
			GLO: market for EUR-flat pallet ecoinvent 3.5				0.388727	-2.06129	0.000909013	0.173926	0.00354982	0.00371039	0.000130899	0.0304759	0.476	0.0243	1.74	0.00622	1.06e-05	0.00193	0.00192	0.00181	1.99e-07	0.00155	2.56
			RER: market for corrugated board box ecoinvent 3.5				1.16041	1.14046	0.00152682	0.420814	0.00982205	0.0168104	0.000568824	0.0364783	1.4	0.117	0.52	0.0245	0.000389	0.00234	0.00355	0.00348	1.37e-06	0.0038	4.7
	DE: Lead emissions -rev5- (001) <u-so>						0	0	0	0	0	0.00145836	0	0.00382039	4.57	0	0	0.00193	0	0	0	0	0	0	7.09

## Sheet: PST_relative
Inventory item							GWP	GWP(+BC)	PMFP	FDP	FWC	FETP	FEP	HTP(C)	HTP(NC)	IRP	LU	METP	MEP	MDP	POFP(E)	POFP(HH)	POFP	TAP	TETP
Life Cycle ProTandem module [Lead emissions] -rev5- (008*) <LC>							1	1	1	1	1	1	1	1	1	1	1	1	1	1	1	1	1	1	1
	CN: A - wafer production (007) <Mfg>						0.686636	0.693548	0.767544	0.75	0.93662	0.849858	0.904762	0.916667	0.743468	0.953521	0.470349	0.717668	0.82623	0.27734	0.681243	0.681871	0.710784	0.740506	0.570234
		CN: A.01 - wafer fabrication (007) <Mfg>					0.682028	0.68894	0.763158	0.737805	0.93662	0.847025	0.904762	0.911458	0.741093	0.952113	0.44186	0.714026	0.82623	0.275862	0.675489	0.674854	0.710784	0.734177	0.563545
			CH: market for brass ecoinvent 3.5				0.000139862	0.000137558	0.00162281	0.000112805	6.07042e-05	0.00600567	0.00401429	0.00209375	0.0184086	4.59155e-05	0.000247674	0.00637523	0.00177705	0.00665025	0.000590334	0.000589474	0.000534314	0.00203797	0.0309365
			CN: Electricity grid mix 1kV-60kV ts				0.0278802	0.0278802	0.0142544	0.0172561	0.0066338	0.000156374	1.8e-05	0.000278646	0.00125891	0.00031831	0.0047093	0.000721311	0.00257049	0.00350246	0.0262371	0.0265497	0.0103431	0.0175316	0.00770903
			CN: single-Si wafer production, photovoltaic (007) ecoinvent 3.5 <u-so>				0	0	0	0	-0.00739437	0.00620397	0.00149524	8.4375e-05	0.00162233	0	0	0.0048816	0.185246	0	0	0	0	0	2.27425e-21
			CN: Thermal energy from natural gas ts				0.00120507	0.00120507	0.000172515	0.00122561	1.5e-06	6.17564e-06	7.90476e-08	9.375e-06	4.98812e-06	2.08451e-07	1.05814e-05	6.41166e-06	3.7377e-06	5.71429e-05	0.000831991	0.000837427	0.0010098	0.000208228	3.27759e-05
			EU-28: Tap water from groundwater ts				2.30184e-09	2.46544e-09	6.69591e-10	1.9878e-09	8.02817e-07	6.28895e-10	6.2381e-10	5.67708e-10	1.24941e-09	1.36338e-10	1.2093e-09	5.79235e-10	8.32787e-09	1.18719e-07	1.53049e-09	1.54386e-09	3.58333e-09	7.40506e-10	4.41472e-10
			GLO: glass wool mat production, without cullet ecoinvent 3.5				0.00014424	0.000143779	0.00019152	0.000142683	4.69718e-05	0.000209065	0.000137143	0.000286979	0.000178622	7.78873e-05	6.39535e-05	0.000181056	8.55738e-05	7.53695e-05	0.000210587	0.000210526	0.00015	0.000182278	0.000173913
			GLO: market for acetic acid, without water, in 98% solution state ecoinvent 3.5				0.000297235	0.000297235	0.000342105	0.00052439	0.000238732	0.000342776	0.000240476	0.000238542	0.000384798	0.000138592	0.000123256	0.00031694	0.00012	0.000170936	0.000371692	0.000353216	0.00032451	0.000309494	0.000571906
			GLO: market for alkylbenzene sulfonate, linear, petrochemical ecoinvent 3.5				0.00179263	0.00178802	0.00225146	0.00385976	0.000659155	0.00419263	0.00138095	0.00177083	0.00249406	0.000298592	0.00105814	0.00358834	0.000777049	0.00126601	0.0027733	0.00264327	0.00116667	0.00224684	0.00459866
			GLO: market for silicon carbide ecoinvent 3.5				0.0822581	0.0822581	0.102632	0.0676829	0.0157746	0.0767705	0.0747619	0.0614583	0.0579572	0.0619718	0.0318605	0.064663	0.0370492	0.00807882	0.078481	0.0790643	0.0588235	0.0879747	0.0508361
			GLO: market for sodium hydroxide, without water, in 50% solution state ecoinvent 3.5				9.00922e-05	8.96313e-05	0.000132164	8.53659e-05	6.97183e-05	0.000131161	0.000107619	0.000101042	0.000140143	6.29577e-05	4.55233e-05	0.00011694	7.44262e-05	5.22167e-05	0.00011473	0.000115439	0.000205882	9.87342e-05	0.000200669
			GLO: market for steel, low-alloyed, hot rolled ecoinvent 3.5				0.0126498	0.0126037	0.0197368	0.0109756	0.00409155	0.0526912	0.0239048	0.218229	0.0648456	0.00319718	0.00616279	0.0495446	0.00645902	0.141379	0.0188723	0.0181287	0.00803922	0.0125316	0.0913043
			GLO: market for wafer factory ecoinvent 3.5				0.00171429	0.0016106	0.00339181	0.00135366	0.000443662	0.0108499	0.00430476	0.0106771	0.0165083	0.0005	0.00454651	0.0103279	0.00331148	0.0144828	0.0027618	0.00271345	0.00158824	0.00363291	0.0314381
			GLO: market for waste, from silicon wafer production ecoinvent 3.5				6.2212e-05	5.16129e-05	7.70468e-05	5.2378e-05	1.07042e-05	5.32578e-05	4.80952e-05	0.000165625	4.65558e-05	7.8169e-06	0.000243023	6.59381e-05	2.33115e-05	0.000430049	0.000120829	0.000118129	3.93627e-05	6.25949e-05	0.000292642
			GLO: market for water, completely softened, from decarbonised water, at user ecoinvent 3.5				7.00461e-06	7.51152e-06	8.05556e-06	5.16463e-06	0.00816901	1.60057e-05	5.04762e-06	2.10417e-05	1.28504e-05	1.5493e-06	5.38953e-06	1.50273e-05	1.01639e-05	2.96059e-05	9.60875e-06	9.4386e-06	4.82843e-06	5.92405e-06	3.5786e-05
			GLO: market for wire drawing, steel ecoinvent 3.5				0.00202628	0.00195696	0.00226167	0.00149775	0.00319696	0.0068394	0.00195597	0.0384468	0.00252845	0.000512288	0.0018466	0.00596164	0.0021402	0.00562985	0.00210438	0.00204573	0.0017634	0.00166759	0.00224335
			RER: hydrochloric acid production, from the reaction of hydrogen with chlorine ecoinvent 3.5				1.14413e-05	1.15471e-05	1.37473e-05	1.51368e-05	1.1327e-05	2.77042e-05	2.3104e-05	1.89307e-05	3.08755e-05	2.70351e-05	1.1811e-05	2.43288e-05	1.43199e-05	1.24277e-05	1.27358e-05	1.27604e-05	2.8544e-05	1.62587e-05	3.91415e-05
			RER: market for acrylic binder, without water, in 34% solution state ecoinvent 3.5				1.26239e-05	1.26092e-05	1.20371e-05	1.99763e-05	8.88598e-06	1.59319e-05	1.0567e-05	1.40289e-05	2.32204e-05	7.72001e-06	8.17483e-06	1.4903e-05	5.12525e-06	9.11331e-06	1.45285e-05	1.38851e-05	8.77585e-06	1.2791e-05	3.2196e-05
			RER: market for dipropylene glycol monomethyl ether ecoinvent 3.5				0.00560424	0.00561224	0.00563325	0.00805979	0.0039392	0.00745323	0.00582356	0.00553238	0.0083008	0.0051823	0.0028095	0.00665798	0.00370184	0.00329215	0.00645367	0.0061667	0.00872898	0.00542004	0.0111929
			RER: market for silicon, single crystal, Czochralski process, photovoltaics ecoinvent 3.5				0.530518	0.538432	0.600742	0.599157	0.892042	0.657153	0.774679	0.56053	0.548414	0.865297	0.381577	0.545036	0.574867	0.0828494	0.520109	0.52113	0.61076	0.587852	0.306894
			RER: market for triethylene glycol ecoinvent 3.5				0.0151374	0.0152053	0.0101209	0.028445	0.0078623	0.0167922	0.0123538	0.0121638	0.0182351	0.0143427	0.00660541	0.0149545	0.00613317	0.00775159	0.0149624	0.0141792	0.00619909	0.0127617	0.0247557
		CN: A.02 - wafer packaging (007) <Mfg>					0.00558851	0.00454186	0.00392838	0.00784862	0.00308846	0.00366135	0.00172031	0.00311168	0.00211615	0.000944742	0.0284009	0.00333247	0.0024817	0.00157426	0.0063063	0.0060621	0.00185905	0.00454539	0.00474922
			GLO: market for packaging film, low density polyethylene ecoinvent 3.5				0.00132372	0.00129136	0.000950254	0.00235355	0.000539825	0.000811839	0.000334808	0.000907586	0.000412112	0.000300886	0.000915515	0.000750713	0.000372446	0.000120283	0.00162772	0.00152604	0.000289377	0.00112006	0.00107233
			GLO: market for polystyrene, high impact ecoinvent 3.5				0.00340626	0.00341781	0.00183785	0.00455915	0.00139037	0.00129409	0.00010251	0.00124024	0.000432904	1.34466e-05	9.35015e-05	0.00115531	0.000285108	0.00011677	0.00316098	0.00303299	0.000102239	0.00246637	0.00129531
			RER: paper production, woodfree, coated, at integrated mill ecoinvent 3.5				0.000858516	-0.000167309	0.00114028	0.000935916	0.00115827	0.00155542	0.00128299	0.000963849	0.00127113	0.00063041	0.0273919	0.00142645	0.00182414	0.00133721	0.0015176	0.00150307	0.00146744	0.000958963	0.00238158
		CN: A.03 - wafer transport (007) <Mfg>					0.000101783	0.000101735	0.000153343	9.63749e-05	9.23708e-06	6.59033e-05	2.07513e-05	4.97266e-05	7.09133e-05	1.49755e-05	0.000110062	0.000154475	1.48194e-05	4.24924e-05	0.000366667	0.000367222	9.67066e-05	0.000178932	0.00131767
			GLO: market group for transport, freight train ecoinvent 3.5				1.37824e-06	1.37479e-06	1.98032e-06	1.17809e-06	2.0597e-07	1.29449e-06	8.12752e-07	2.51192e-06	1.21887e-06	4.25659e-07	1.54925e-06	1.24478e-06	3.79145e-07	1.70151e-06	6.20771e-06	6.22571e-06	1.28603e-06	1.9268e-06	2.76766e-06
			GLO: market group for transport, freight, lorry, unspecified ecoinvent 3.5				7.70196e-05	7.70159e-05	7.04717e-05	7.40604e-05	6.90908e-06	5.65028e-05	1.32619e-05	3.67401e-05	6.30429e-05	8.86534e-06	0.000103672	0.000145348	1.07719e-05	3.24393e-05	0.000209145	0.000208418	7.20862e-05	7.01273e-05	0.00130464
			GLO: transport, freight, sea, transoceanic ship ecoinvent 3.5				2.31668e-05	2.31757e-05	8.06159e-05	2.09595e-05	2.07883e-06	7.90843e-06	6.46725e-06	9.73857e-06	6.49059e-06	5.6596e-06	3.77653e-06	7.69202e-06	3.56989e-06	6.33935e-06	0.000151	0.000152279	2.32225e-05	0.000106679	9.87568e-06
			RoW: treatment of waste, from silicon wafer production, underground deposit ecoinvent 3.5				2.1881e-07	1.68201e-07	2.74973e-07	1.7684e-07	4.32038e-08	1.9762e-07	2.09418e-07	7.35981e-07	1.60943e-07	2.49119e-08	1.06447e-06	1.90977e-07	9.851e-08	2.0123e-06	3.15298e-07	2.99343e-07	1.11818e-07	1.99392e-07	3.85865e-07
	DE: B - cell manufacturing [default] -rev5- (008*) <Mfg>						0.0947336	0.0953358	0.0803316	0.0741048	0.0166095	0.106414	0.0657267	0.0563932	0.191156	0.014685	0.124519	0.228518	0.0882208	0.365856	0.0824749	0.0812894	0.147562	0.0637156	0.103707
		DE: B.01 - wafer cleaning/ texturing (wet chemistry) -rev4- (001) <Mfg>					0.0126034	0.0125481	0.00561645	0.0108621	0.023365	0.00987376	0.00325859	0.00303949	0.00492002	0.00229838	0.0203425	0.00887607	0.00588205	0.00900387	0.0091267	0.00910505	0.0125256	0.00606239	0.0107742
			DE: Preparation of CellTex proxy <LC>				0.000615987	0.000615578	0.000401101	0.00109386	0.000226685	0.000358442	0.000604035	0.000355339	0.000438611	7.41688e-05	0.000397394	0.000444843	0.000288776	0.000307448	0.00104055	0.00097295	0.000252852	0.000463051	0.00206623
				DE: Sodium hydroxide (caustic soda) mix (100%) ts			4.43397e-05	4.41899e-05	1.22336e-05	3.62804e-05	4.75916e-06	4.26786e-07	3.87749e-07	3.58725e-07	1.29408e-06	3.24086e-06	6.55827e-05	7.9113e-07	2.0249e-05	2.78999e-05	3.89878e-05	3.92908e-05	3.8213e-05	1.5676e-05	8.67442e-06
				GLO: market for water, ultrapure ecoinvent 3.5			0.00013232	0.000132211	0.000146981	0.000121836	0.00010527	0.000106853	0.000226306	0.000132429	0.000110035	2.61412e-05	0.000164398	0.000198166	0.000208524	9.533e-05	0.000444464	0.000444418	0.000129238	0.000144532	0.00146863
				RER: market for ethanol, without water, in 99.7% solution state, from ethylene ecoinvent 3.5			0.000439327	0.000439176	0.000241886	0.00093574	0.000116656	0.000251162	0.000377341	0.000222551	0.000327281	4.47867e-05	0.000167413	0.000245885	6.00023e-05	0.000184218	0.000557099	0.000489242	8.54012e-05	0.000302843	0.000588925
			DE: preparation of hydrogen chloride (36% in H2O) <Mfg>				4.6487e-06	4.64909e-06	1.67482e-06	5.66467e-06	9.15583e-07	7.62821e-07	1.46583e-06	8.89888e-07	1.04009e-06	2.9189e-07	3.57224e-06	1.45925e-06	2.50556e-06	3.32528e-06	5.27731e-06	5.24331e-06	4.58254e-06	1.89693e-06	1.30315e-05
				DE: Hydrochloric acid mix (100%) ts			3.81072e-06	3.81179e-06	7.43982e-07	4.89308e-06	2.48906e-07	8.61186e-08	3.26272e-08	5.12114e-08	3.43233e-07	1.26337e-07	2.53111e-06	2.0426e-07	1.18497e-06	2.72155e-06	2.46251e-06	2.42881e-06	3.76407e-06	9.81609e-07	3.73066e-06
				GLO: market for water, ultrapure ecoinvent 3.5			8.37987e-07	8.37297e-07	9.30833e-07	7.71591e-07	6.66676e-07	6.76702e-07	1.4332e-06	8.38677e-07	6.96854e-07	1.65553e-07	1.04113e-06	1.25499e-06	1.32059e-06	6.03726e-07	2.81479e-06	2.8145e-06	8.18464e-07	9.15322e-07	9.30087e-06
			DE: preparation of hydrogen fluoride (49% in H2O) <Mfg>				0.00017014	0.000168747	0.000559735	0.000263876	0.000263087	0.000372253	0.000200098	0.000224882	0.000561611	9.58944e-05	0.000152907	0.000397388	9.99987e-05	0.000292793	0.000344926	0.000344462	0.000156148	0.000747159	0.00129458
				GLO: market for water, ultrapure ecoinvent 3.5			5.72375e-06	5.71904e-06	6.35793e-06	5.27024e-06	4.55364e-06	4.62212e-06	9.78927e-06	5.72846e-06	4.75976e-06	1.13078e-06	7.11132e-06	8.57203e-06	9.02008e-06	4.12366e-06	1.9226e-05	1.92241e-05	5.5904e-06	6.25197e-06	6.35283e-05
				RER: market for hydrogen fluoride ecoinvent 3.5			0.000164416	0.000163028	0.000553377	0.000258606	0.000258534	0.000367631	0.000190309	0.000219153	0.000556852	9.47637e-05	0.000145796	0.000388816	9.09786e-05	0.000288669	0.0003257	0.000325238	0.000150558	0.000740907	0.00123105
			DE: preparation of potassium hydroxide (50% in H2O) <Mfg>				0.00220701	0.00220161	0.00281315	0.00208009	0.000601337	0.00294176	0.00232106	0.00221518	0.00349878	0.00114782	0.00157889	0.00267191	0.00113927	0.00156038	0.0026417	0.00264995	0.00202861	0.00232899	0.00503857
				GLO: market for potassium hydroxide ecoinvent 3.5			0.00218831	0.00218292	0.00279237	0.00206287	0.000586456	0.00292665	0.00228907	0.00219646	0.00348322	0.00114413	0.00155565	0.00264389	0.00110979	0.00154691	0.00257887	0.00258712	0.00201034	0.00230856	0.00483096
				GLO: market for water, ultrapure ecoinvent 3.5			1.87051e-05	1.86897e-05	2.07775e-05	1.7223e-05	1.48812e-05	1.5105e-05	3.19911e-05	1.87205e-05	1.55548e-05	3.69537e-06	2.32396e-05	2.80132e-05	2.94774e-05	1.3476e-05	6.28302e-05	6.28237e-05	1.82693e-05	2.04313e-05	0.000207609
			DE: X.03 - ultrapure water system -rev4- (001) <Mfg>				0.000839639	0.000840164	0.000166791	0.000647595	0.0211937	3.831e-05	2.65669e-05	4.48312e-05	6.30002e-05	8.01329e-05	0.00154763	4.4378e-05	0.00057085	0.00347477	0.000451011	0.000455672	0.00116878	0.000221594	0.000250018
				CH: ion-exchanger production for water treatment ecoinvent 3.5			8.32201e-06	8.34549e-06	7.5737e-06	6.72837e-06	2.43559e-06	1.57915e-05	3.62654e-06	2.4513e-05	1.02406e-05	2.65663e-06	4.26973e-06	1.62853e-05	4.85724e-06	4.5074e-05	6.94131e-06	6.79612e-06	0.000265759	6.21053e-06	5.55759e-05
				DE: Electricity grid mix 1kV-60kV ts			0.00076762	0.000763365	0.000141403	0.000588207	9.02161e-05	5.89888e-06	6.50518e-06	5.38335e-06	1.84371e-05	7.56415e-05	0.0015018	1.27858e-05	0.000337632	0.000303579	0.000401448	0.000405965	0.000801767	0.000195815	0.000181496
				DE: Tap water from groundwater ts			6.36824e-05	6.84397e-05	1.78105e-05	5.26442e-05	0.0211011	1.66195e-05	1.64348e-05	1.49348e-05	3.43222e-05	1.82917e-06	4.15405e-05	1.53066e-05	0.000228356	0.00312611	4.26135e-05	4.29028e-05	0.000101249	1.95636e-05	1.29427e-05
				DE: X.03 - ultra pure water system -rev4- (001) ecoinvent 3.5 <u-so>			3.28553e-13	3.28553e-13	0	0	-6.12591e-14	0	2.41897e-10	0	0	0	0	0	2.4256e-10	0	0	0	0	0	0
				EU-28: Compressed air ts			1.42279e-08	1.41569e-08	4.06259e-09	1.51795e-08	3.8951e-09	1.28838e-10	7.80363e-11	1.24517e-10	3.38741e-10	5.57412e-09	2.06835e-08	2.63634e-10	4.64007e-09	3.94085e-09	8.18643e-09	8.26699e-09	9.62499e-09	5.61111e-09	3.03294e-09
			CH: treatment of waste plastic, industrial electronics, municipal incineration ecoinvent 3.5				7.0859e-05	7.08648e-05	1.97835e-06	5.46934e-07	5.7063e-07	0.00596671	1.21843e-06	4.50013e-05	0.000107792	2.37491e-07	3.27695e-07	0.00506001	1.58812e-05	8.85283e-07	9.79381e-06	9.85121e-06	3.26108e-05	2.4976e-06	2.13611e-06
			CH: treatment of waste polystyrene, municipal incineration ecoinvent 3.5				4.52298e-05	4.52317e-05	5.92277e-07	1.29395e-07	2.25277e-07	5.33346e-05	1.0371e-07	1.39564e-05	5.5778e-06	4.63802e-08	8.24753e-08	4.38488e-05	1.39894e-06	3.92864e-07	3.01334e-06	3.00655e-06	2.91036e-06	7.33008e-07	4.87254e-07
			DE: Electricity grid mix 1kV-60kV ts				0.00814395	0.00809881	0.00150019	0.0062405	0.000957135	6.25834e-05	6.90158e-05	5.71139e-05	0.000195606	0.000802508	0.0159331	0.000135649	0.00358206	0.00322078	0.00425911	0.00430703	0.00850623	0.00207747	0.00192556
			DE: Nitrogen (liquid) ts				0.000226077	0.00022483	4.16506e-05	0.000173239	2.77203e-05	1.74183e-06	1.92022e-06	1.58948e-06	5.43964e-06	2.22757e-05	0.000442266	3.76977e-06	9.9497e-05	8.95999e-05	0.000118251	0.000119581	0.000236137	5.76767e-05	5.34541e-05
			DE: Oxygen (liquid) ts				2.58642e-05	2.57213e-05	4.76478e-06	1.98192e-05	3.1186e-06	1.99066e-07	2.19483e-07	1.81661e-07	6.21879e-07	2.54853e-06	5.0599e-05	4.31089e-07	1.13802e-05	1.02419e-05	1.35276e-05	1.36798e-05	2.7015e-05	6.5982e-06	6.11537e-06
			EU-28: Compressed air ts				0.000120759	0.000120156	3.44812e-05	0.000128835	3.30596e-05	1.09351e-06	6.62332e-07	1.05683e-06	2.87506e-06	4.73103e-05	0.000175551	2.23759e-06	3.93825e-05	3.34479e-05	6.94822e-05	7.01659e-05	8.16919e-05	4.76242e-05	2.5742e-05
			GLO: market for packaging film, low density polyethylene ecoinvent 3.5				7.22252e-05	7.04595e-05	5.18479e-05	0.000128415	2.9454e-05	4.42956e-05	1.82678e-05	4.95198e-05	2.24857e-05	1.6417e-05	4.99525e-05	4.09605e-05	2.03215e-05	6.56287e-06	8.88118e-05	8.32641e-05	1.5789e-05	6.11128e-05	5.85084e-05
			GLO: market for polystyrene foam slab ecoinvent 3.5				6.0973e-05	6.1232e-05	3.84928e-05	7.9495e-05	2.79083e-05	3.22739e-05	1.39574e-05	2.99456e-05	1.65837e-05	8.72283e-06	1.0255e-05	2.9199e-05	1.07274e-05	3.24401e-06	8.12489e-05	7.01981e-05	1.22457e-05	4.59912e-05	3.98011e-05
		DE: B.02 - PECVD of a-Si:H (deposition thin film layer) -rev4- (001) <Mfg>					0.00741443	0.007379	0.00151025	0.0058957	0.014685	0.000277456	0.000311338	0.0002487	0.000411785	0.000980512	0.0125793	0.00031804	0.00315136	0.00466445	0.00384719	0.00388484	0.00686076	0.00199347	0.00177689
			GLO: preparation of phosphine [1% PH3 in H2] <Mfg>				7.17448e-07	7.1476e-07	8.19913e-07	1.09904e-06	3.21033e-07	6.89797e-07	4.50449e-06	5.99899e-07	6.00522e-07	4.96906e-07	4.46545e-07	5.86774e-07	4.79392e-07	5.09785e-06	7.99991e-07	7.91665e-07	5.95893e-07	6.64325e-07	5.42078e-07
				GLO: market for phosphane ecoinvent 3.5			4.17899e-07	4.14118e-07	6.76788e-07	4.86913e-07	1.42859e-07	5.29367e-07	4.39437e-06	4.574e-07	4.65717e-07	3.67751e-07	3.93202e-07	4.47464e-07	3.92007e-07	5.05133e-06	5.61569e-07	5.65271e-07	4.20141e-07	4.87375e-07	3.81188e-07
				RER: market for hydrogen, liquid ecoinvent 3.5			2.99549e-07	3.00642e-07	1.43126e-07	6.12124e-07	1.78174e-07	1.6043e-07	1.10119e-07	1.42499e-07	1.34805e-07	1.29156e-07	5.33429e-08	1.39311e-07	8.73854e-08	4.65286e-08	2.38422e-07	2.26394e-07	1.75752e-07	1.76951e-07	1.6089e-07
			RER: preparation of nitrogen trifluoride, at plant <Mfg>				1.80734e-05	1.81582e-05	1.53561e-05	2.23536e-05	8.97647e-06	1.81269e-05	1.61294e-05	1.21624e-05	1.64859e-05	2.5644e-05	2.14941e-05	1.59348e-05	1.16598e-05	7.22672e-06	1.52629e-05	1.5357e-05	1.59013e-05	2.04327e-05	2.09237e-05
				DE: Tap water from groundwater ts			1.91686e-09	2.06006e-09	5.36102e-10	1.58461e-09	6.35151e-07	5.00255e-10	4.94695e-10	4.49542e-10	1.03311e-09	5.50587e-11	1.25038e-09	4.60735e-10	6.87361e-09	9.40971e-08	1.28268e-09	1.29139e-09	3.04763e-09	5.88871e-10	3.89581e-10
				EU-28: Electricity grid mix 1kV-60kV ts			9.63324e-06	9.58502e-06	2.74096e-06	1.02566e-05	2.62165e-06	8.71632e-08	5.31387e-08	8.41921e-08	2.29267e-07	3.75532e-06	1.40683e-05	1.78316e-07	3.15469e-06	2.67757e-06	5.53502e-06	5.58952e-06	6.53719e-06	3.78578e-06	2.05421e-06
				GLO: market for chemical factory, organics ecoinvent 3.5			3.40175e-08	3.15506e-08	7.27149e-08	3.02384e-08	1.00704e-08	2.57027e-07	1.2534e-07	1.60607e-07	4.57838e-07	2.25231e-08	9.51591e-08	2.42532e-07	5.29914e-08	2.74115e-07	5.23145e-08	5.20148e-08	3.94292e-08	7.14285e-08	6.78892e-07
				GLO: market group for transport, freight, lorry, unspecified ecoinvent 3.5			1.47516e-08	1.47509e-08	1.34975e-08	1.41848e-08	1.3233e-09	1.0822e-08	2.54005e-09	7.03685e-09	1.20746e-08	1.69798e-09	1.98563e-08	2.78385e-08	2.06314e-09	6.21311e-09	4.00575e-08	3.99183e-08	1.38067e-08	1.34315e-08	2.49879e-07
				RENAMER | water (tap water) -> water, cooling, unspecified natural origin <u-so>			0	0	0	0	-4.22837e-07	0	0	0	0	0	0	0	0	0	0	0	0	0	0
				RENAMER | water (tap water) -> water, unspecified natural origin <u-so>			0	0	0	0	-2.11418e-07	0	0	0	0	0	0	0	0	0	0	0	0	0	0
				RER: market for ammonia, liquid ecoinvent 3.5			2.98323e-07	2.97977e-07	2.01206e-07	3.57296e-07	2.57168e-07	1.07783e-07	5.60214e-08	7.47853e-08	1.63152e-07	4.12106e-08	4.0386e-08	2.03267e-07	9.19941e-08	1.20997e-07	1.76865e-07	1.74003e-07	2.54391e-07	2.18762e-07	1.12281e-06
				RER: market for fluorine, liquid ecoinvent 3.5			8.05244e-06	8.18792e-06	1.22344e-05	1.1656e-05	5.63205e-06	1.69184e-05	1.57759e-05	1.12706e-05	1.50763e-05	2.17898e-05	7.22363e-06	1.46932e-05	7.9887e-06	4.00225e-06	9.32701e-06	9.36968e-06	9.00749e-06	1.61341e-05	1.67354e-05
				RER: market group for heat, district or industrial, natural gas ecoinvent 3.5			2.28672e-09	2.28709e-09	2.72484e-10	2.41715e-09	2.72424e-11	1.79862e-10	6.83537e-11	1.78544e-10	9.70066e-11	6.93895e-11	3.67704e-11	4.62109e-10	3.80799e-11	1.36867e-10	8.15012e-10	7.98026e-10	1.23452e-09	3.49156e-10	1.31071e-10
				RER: market group for transport, freight train ecoinvent 3.5			3.15533e-08	3.16364e-08	4.25077e-08	3.20515e-08	7.98008e-09	3.40059e-08	2.92116e-08	6.53562e-08	3.44874e-08	3.19127e-08	4.30116e-08	3.2414e-08	1.46298e-08	4.1257e-08	1.22652e-07	1.2294e-07	3.1694e-08	4.61495e-08	6.65931e-08
				RER: preparation of nitrogen trifluoride, at plant <u-so>			0	0	4.44176e-08	0	6.34255e-07	0	0	0	0	0	0	0	0	0	0	0	0	1.57036e-07	0
				RoW: treatment of wastewater from wafer fabrication, capacity 1.1E10l/year ecoinvent 3.5			4.88114e-09	5.03527e-09	5.57157e-09	3.19266e-09	-1.88948e-07	7.11053e-07	8.66653e-08	4.99199e-07	5.11644e-07	1.49749e-09	2.46312e-09	5.56212e-07	3.47804e-07	1.00863e-08	6.85176e-09	6.83868e-09	1.29891e-08	5.06184e-09	1.53309e-08
			RER: preparation of silane (silicon tetrahydride) <Mfg>				0.000178872	0.000181148	0.000127078	0.000200255	8.05539e-05	0.000114094	0.000161949	0.000116588	0.000115461	0.000215892	0.000165401	0.000105047	9.69047e-05	2.83929e-05	0.000143176	0.000142409	0.000147037	0.000144656	8.09271e-05
				DE: market for silicon tetrachloride ecoinvent 3.5			3.50173e-06	3.67701e-06	2.29264e-06	3.51519e-06	2.42852e-05	4.24653e-06	8.18005e-06	4.67668e-06	4.62517e-06	3.7767e-06	2.59552e-06	3.54756e-06	3.8479e-06	4.13053e-07	2.28119e-06	2.27408e-06	4.71923e-06	4.00598e-06	1.26226e-06
				EU-28: Electricity grid mix 1kV-60kV ts			2.55685e-05	2.54405e-05	7.27504e-06	2.72232e-05	6.95837e-06	2.31348e-07	1.4104e-07	2.23462e-07	6.0852e-07	9.96735e-06	3.734e-05	4.73286e-07	8.37315e-06	7.10679e-06	1.4691e-05	1.48357e-05	1.7351e-05	1.00482e-05	5.45228e-06
				GLO: market for silicone factory ecoinvent 3.5			3.64494e-08	3.28908e-08	5.07267e-08	2.77666e-08	1.0103e-08	9.96009e-08	3.89018e-08	1.14997e-07	1.07674e-07	1.11237e-08	2.77924e-07	9.4569e-08	3.96948e-08	1.53945e-07	6.49146e-08	6.39149e-08	2.77411e-08	5.90108e-08	2.07077e-07
				GLO: market group for transport, freight, lorry, unspecified ecoinvent 3.5			2.71795e-07	2.71781e-07	2.48688e-07	2.61352e-07	2.43814e-08	1.99393e-07	4.67998e-08	1.29652e-07	2.22472e-07	3.12849e-08	3.65848e-07	5.12917e-07	3.80128e-08	1.14475e-07	7.3805e-07	7.35485e-07	2.54385e-07	2.47472e-07	4.60395e-06
				RER: market for hydrogen, liquid ecoinvent 3.5			4.96043e-07	4.97853e-07	2.37011e-07	1.01366e-06	2.9505e-07	2.65667e-07	1.82353e-07	2.35974e-07	2.23232e-07	2.13877e-07	8.83341e-08	2.30694e-07	1.44707e-07	7.70499e-08	3.94819e-07	3.74902e-07	2.91039e-07	2.93024e-07	2.66429e-07
				RER: market for lime, hydrated, packed ecoinvent 3.5			1.15925e-06	1.16604e-06	2.08594e-07	3.0914e-07	4.92329e-08	9.5346e-08	3.41602e-08	5.73924e-08	6.77057e-08	1.31527e-07	4.90697e-07	1.14639e-07	3.61003e-08	3.74873e-08	3.65059e-07	3.61177e-07	2.49187e-07	2.55032e-07	3.8018e-07
				RER: market for nitrogen, liquid ecoinvent 3.5			4.07635e-06	4.17004e-06	4.43472e-06	5.76979e-06	6.15587e-06	8.19061e-06	8.57319e-06	5.64324e-06	5.78999e-06	1.29129e-05	3.62421e-06	6.75459e-06	4.38297e-06	6.40241e-07	4.06658e-06	4.09562e-06	4.73481e-06	5.78245e-06	3.46609e-06
				RER: market group for heat, district or industrial, natural gas ecoinvent 3.5			2.6695e-05	2.66992e-05	3.18096e-06	2.82175e-05	3.18026e-07	2.0997e-06	7.97955e-07	2.0843e-06	1.13245e-06	8.10046e-07	4.29255e-07	5.39462e-06	4.44542e-07	1.59777e-06	9.51438e-06	9.31609e-06	1.44117e-05	4.07602e-06	1.53011e-06
				RER: market group for transport, freight train ecoinvent 3.5			5.81115e-07	5.82646e-07	7.82862e-07	5.90291e-07	1.46969e-07	6.26285e-07	5.37989e-07	1.20366e-06	6.35152e-07	5.87735e-07	7.92143e-07	5.96967e-07	2.69435e-07	7.59829e-07	2.25888e-06	2.26417e-06	5.83706e-07	8.49933e-07	1.22644e-06
				RER: preparation of silane (silicon tetrahydride) <u-so>			0	0	0	0	0	4.84093e-08	1.02464e-08	1.10344e-09	4.4737e-08	0	0	3.74419e-08	3.20168e-06	0	0	0	0	0	6.86263e-26
				RER: silicon production, solar grade, modified Siemens process ecoinvent 3.5			0.000116485	0.00011861	0.000108366	0.000133327	4.23106e-05	9.79909e-05	0.000143406	0.000102218	0.000102004	0.00018745	0.000119397	8.72895e-05	7.61265e-05	1.74922e-05	0.000108801	0.000108088	0.000104415	0.000119039	6.25323e-05
			DE: Argon (liquid) ts				1.9774e-06	1.96647e-06	3.64282e-07	1.51524e-06	2.38419e-07	1.52192e-08	1.67801e-08	1.38885e-08	4.75446e-08	1.94843e-07	3.86845e-06	3.29581e-08	8.70053e-07	7.83023e-07	1.03423e-06	1.04587e-06	2.06538e-06	5.04453e-07	4.6754e-07
			DE: Electricity grid mix 1kV-60kV ts				0.00553789	0.00550719	0.00102013	0.00424354	0.000650852	4.25567e-05	4.69307e-05	3.88374e-05	0.000133012	0.000545705	0.0108345	9.22414e-05	0.0024358	0.00219013	0.00289619	0.00292878	0.00578424	0.00141268	0.00130938
			DE: Tap water from groundwater ts				0.000165912	0.000178306	4.64018e-05	0.000137154	0.0549748	4.3299e-05	4.28178e-05	3.89096e-05	8.94198e-05	4.76555e-06	0.000108226	3.98784e-05	0.000594938	0.00814448	0.000111021	0.000111775	0.000263785	5.09691e-05	3.37198e-05
			DE: Tap water from groundwater ts				-0.000124434	-0.00013373	-3.48013e-05	-0.000102866	-0.0412311	-3.24743e-05	-3.21134e-05	-2.91822e-05	-6.70648e-05	-3.57416e-06	-8.11693e-05	-2.99088e-05	-0.000446204	-0.00610836	-8.3266e-05	-8.38311e-05	-0.000197838	-3.82268e-05	-2.52899e-05
			EU-28: Compressed air ts				0.000186315	0.000185384	5.31995e-05	0.000198775	5.10062e-05	1.68713e-06	1.02188e-06	1.63054e-06	4.43581e-06	7.2993e-05	0.000270849	3.45228e-06	6.07616e-05	5.16054e-05	0.000107201	0.000108256	0.000126039	7.34773e-05	3.97163e-05
			GLO: market for diborane ecoinvent 3.5				5.7425e-05	5.71705e-05	9.29488e-05	6.2888e-05	2.74852e-05	8.01356e-05	6.21823e-05	5.66204e-05	9.77242e-05	3.31046e-05	2.55975e-05	7.3304e-05	3.08136e-05	9.48987e-05	7.73171e-05	7.74159e-05	6.14838e-05	8.22886e-05	0.00013693
			NL: Nitrogen (liquid) ts				0.00138664	0.00137763	0.000186345	0.00112068	0.000118821	6.62549e-06	6.04495e-06	1.01206e-05	1.93931e-05	8.31157e-05	0.00122921	1.51265e-05	0.000363867	0.000249414	0.000574435	0.000579034	0.0006545	0.000243051	0.000176862
			RER: market for hydrogen, liquid ecoinvent 3.5				5.04291e-06	5.06131e-06	2.40952e-06	1.03051e-05	2.99956e-06	2.70084e-06	1.85385e-06	2.39898e-06	2.26944e-06	2.17434e-06	8.98028e-07	2.3453e-06	1.47113e-06	7.83311e-07	4.01383e-06	3.81135e-06	2.95878e-06	2.97897e-06	2.70859e-06
		DE: B.03 - sputter FS: ITO (indium-tin-oxide) -rev4- (001) <Mfg>					0.00109774	0.00109227	0.000221846	0.000846155	0.00237008	5.18076e-05	3.53817e-05	2.60618e-05	0.000145281	0.000116188	0.00211784	8.9256e-05	0.000508037	0.000920808	0.000591342	0.000597316	0.0011491	0.000301317	0.000691606
			DE: Argon (liquid) ts				7.00461e-07	6.9659e-07	1.29041e-07	5.36748e-07	8.4456e-08	5.39115e-09	5.94408e-09	4.91977e-09	1.68419e-08	6.90199e-08	1.37033e-06	1.16748e-08	3.08202e-07	2.77373e-07	3.66359e-07	3.7048e-07	7.31626e-07	1.78694e-07	1.65618e-07
			DE: Electricity grid mix 1kV-60kV ts				0.0010237	0.00101802	0.000188574	0.000784432	0.000120312	7.86674e-06	8.6753e-06	7.17923e-06	2.45877e-05	0.000100875	0.00200279	1.70511e-05	0.000450266	0.000404853	0.000535371	0.000541394	0.00106923	0.000261138	0.000242043
			DE: Nitrogen (liquid) ts				4.52154e-05	4.4966e-05	8.33012e-06	3.46477e-05	5.54406e-06	3.48366e-07	3.84043e-07	3.17896e-07	1.08793e-06	4.45513e-06	8.84531e-05	7.53953e-07	1.98994e-05	1.792e-05	2.36502e-05	2.39163e-05	4.72274e-05	1.15353e-05	1.06908e-05
			DE: Oxygen (liquid) ts				7.18451e-09	7.1448e-09	1.32355e-09	5.50533e-09	8.66277e-10	5.52962e-11	6.09675e-11	5.04613e-11	1.72744e-10	7.07925e-10	1.40553e-08	1.19747e-10	3.16117e-09	2.84497e-09	3.75768e-09	3.79995e-09	7.50416e-09	1.83283e-09	1.69871e-09
			DE: Tap water from groundwater ts				2.70089e-05	2.90266e-05	7.55377e-06	2.23274e-05	0.00894939	7.04868e-06	6.97034e-06	6.33412e-06	1.45567e-05	7.75787e-07	1.76181e-05	6.49183e-06	9.68504e-05	0.00132585	1.80732e-05	1.81959e-05	4.29417e-05	8.2973e-06	5.48927e-06
			DE: Tap water from groundwater ts				-2.02567e-05	-2.177e-05	-5.66533e-06	-1.67456e-05	-0.00671204	-5.28651e-06	-5.22775e-06	-4.75059e-06	-1.09175e-05	-5.8184e-07	-1.32136e-05	-4.86887e-06	-7.26378e-05	-0.000994384	-1.35549e-05	-1.36469e-05	-3.22063e-05	-6.22298e-06	-4.11695e-06
			EU-28: Compressed air ts				1.03508e-05	1.02991e-05	2.95553e-06	1.1043e-05	2.83368e-06	9.37293e-08	5.67713e-08	9.05856e-08	2.46434e-07	4.05517e-06	1.50472e-05	1.91793e-07	3.37564e-06	2.86697e-06	5.95562e-06	6.01422e-06	7.00217e-06	4.08207e-06	2.20646e-06
			RER: market for indium tin oxide powder, nanoscale, for sputtering target ecoinvent 3.5				1.10127e-05	1.10267e-05	1.99668e-05	9.90834e-06	3.95884e-06	4.17312e-05	2.4517e-05	1.68856e-05	0.000115703	6.53829e-06	5.75671e-06	6.96243e-05	9.97198e-06	0.000163426	2.14766e-05	2.10679e-05	1.41572e-05	2.23073e-05	0.000435126
		DE: B.04 - sputter RS: ITO (indium-tin-oxide) -rev4- (001) <Mfg>					0.0105704	0.010518	0.00214347	0.00814967	0.0236509	0.00051494	0.00035036	0.000257756	0.00144302	0.00112177	0.0203822	0.000885773	0.00490124	0.00904677	0.00570053	0.00575788	0.0110658	0.00290934	0.00681983
			DE: Argon (liquid) ts				7.00461e-06	6.9659e-06	1.29041e-06	5.36748e-06	8.4456e-07	5.39115e-08	5.94408e-08	4.91977e-08	1.68419e-07	6.90199e-07	1.37033e-05	1.16748e-07	3.08202e-06	2.77373e-06	3.66359e-06	3.7048e-06	7.31626e-06	1.78694e-06	1.65618e-06
			DE: Electricity grid mix 1kV-60kV ts				0.010237	0.0101802	0.00188574	0.00784432	0.00120312	7.86674e-05	8.6753e-05	7.17923e-05	0.000245877	0.00100875	0.0200279	0.000170511	0.00450266	0.00404853	0.00535371	0.00541394	0.0106923	0.00261138	0.00242043
			DE: Nitrogen (liquid) ts				4.52154e-05	4.4966e-05	8.33012e-06	3.46477e-05	5.54406e-06	3.48366e-07	3.84043e-07	3.17896e-07	1.08793e-06	4.45513e-06	8.84531e-05	7.53953e-07	1.98994e-05	1.792e-05	2.36502e-05	2.39163e-05	4.72274e-05	1.15353e-05	1.06908e-05
			DE: Oxygen (liquid) ts				7.18451e-09	7.1448e-09	1.32355e-09	5.50533e-09	8.66277e-10	5.52962e-11	6.09675e-11	5.04613e-11	1.72744e-10	7.07925e-10	1.40553e-08	1.19747e-10	3.16117e-09	2.84497e-09	3.75768e-09	3.79995e-09	7.50416e-09	1.83283e-09	1.69871e-09
			DE: Tap water from groundwater ts				0.000270089	0.000290266	7.55377e-05	0.000223274	0.0894939	7.04868e-05	6.97034e-05	6.33412e-05	0.000145567	7.75787e-06	0.000176181	6.49183e-05	0.000968504	0.0132585	0.000180732	0.000181959	0.000429417	8.2973e-05	5.48927e-05
			DE: Tap water from groundwater ts				-0.000202567	-0.0002177	-5.66533e-05	-0.000167456	-0.0671204	-5.28651e-05	-5.22775e-05	-4.75059e-05	-0.000109175	-5.8184e-06	-0.000132136	-4.86887e-05	-0.000726378	-0.00994384	-0.000135549	-0.000136469	-0.000322063	-6.22298e-05	-4.11695e-05
			EU-28: Compressed air ts				0.000103508	0.000102991	2.95553e-05	0.00011043	2.83368e-05	9.37293e-07	5.67713e-07	9.05856e-07	2.46434e-06	4.05517e-05	0.000150472	1.91793e-06	3.37564e-05	2.86697e-05	5.95562e-05	6.01422e-05	7.00217e-05	4.08207e-05	2.20646e-05
			RER: market for indium tin oxide powder, nanoscale, for sputtering target ecoinvent 3.5				0.000110127	0.000110267	0.000199668	9.90834e-05	3.95884e-05	0.000417312	0.00024517	0.000168856	0.00115703	6.53829e-05	5.75671e-05	0.000696243	9.97198e-05	0.00163426	0.000214766	0.000210679	0.000141572	0.000223073	0.00435126
		DE: B.05 - Spiro-MeOTAD [PTAA proxy] deposition (FS) -rev5- (001) <Mfg>					0.0278035	0.0277598	0.0519847	0.0211679	0.00452972	0.0237032	0.0175141	0.0149086	0.0207946	0.00420941	0.00695983	0.0198449	0.0101778	0.118106	0.0257561	0.0243011	0.0582048	0.0331447	0.0147509
			GLO: preparation of Spiro-OMeTAD -rev5- (001) <Mfg>				0.0276403	0.0275975	0.0519534	0.0210392	0.00429895	0.0237017	0.0175126	0.0149072	0.0207903	0.00418984	0.00664748	0.0198421	0.0101055	0.118013	0.02567	0.0242141	0.0580384	0.0331013	0.0147126
				GLO: preparation of 2,2`, 7,7`-Tetrabromo-9-9`-spirobi [9H-fluorene] <Mfg>			0.0129967	0.0129059	0.0343513	0.0124922	0.00102197	0.0158063	0.0100811	0.00996393	0.0120301	0.00146559	0.00422503	0.0128479	0.00468209	0.0966549	0.0173916	0.016282	0.0050143	0.00868428	0.00564986
					GLO: preparation of 4-Bromobiphenyl <Mfg>		1.36688e-06	1.36472e-06	1.44636e-06	1.82964e-06	7.60447e-07	1.34145e-06	1.04894e-06	1.00162e-06	1.54669e-06	6.43192e-07	5.29492e-07	1.28835e-06	5.85113e-07	6.25714e-07	1.46107e-06	1.41327e-06	1.44062e-06	1.41407e-06	3.20518e-06
						GLO: preparation of biphenyl <Mfg>	9.33032e-08	9.28204e-08	1.10371e-07	2.10967e-07	4.04655e-08	5.0788e-08	7.84045e-08	7.44756e-08	5.43649e-08	1.0839e-08	2.63632e-08	4.42815e-08	3.78795e-08	5.7171e-09	1.37599e-07	1.20225e-07	2.23255e-08	8.63636e-08	2.77371e-08
						GLO: preparation of biphenyl <Mfg>	9.05529e-08	9.00062e-08	1.07378e-07	2.07063e-07	3.64126e-08	4.52289e-08	7.25755e-08	7.06556e-08	5.04437e-08	2.05444e-09	2.39313e-08	3.97216e-08	3.48988e-08	5.29473e-09	1.34914e-07	1.1752e-07	1.91261e-08	8.24542e-08	2.57003e-08
						GLO: preparation of biphenyl <Mfg>	2.74881e-09	2.81261e-09	2.99122e-09	3.90291e-09	4.18933e-09	5.55555e-09	5.82797e-09	3.81533e-09	3.91854e-09	8.78431e-09	2.43078e-09	4.55659e-09	2.97864e-09	4.15675e-10	2.68258e-09	2.70245e-09	3.19845e-09	3.9082e-09	2.02894e-09
						GLO: preparation of biphenyl <Mfg>	1.48694e-12	1.6065e-12	1.67857e-12	1.07374e-12	-1.36457e-10	3.47983e-12	1.00266e-12	4.67008e-12	2.68986e-12	2.78549e-13	1.15871e-12	3.27181e-12	2.11697e-12	6.69533e-12	2.06404e-12	2.02517e-12	8.96732e-13	1.21339e-12	7.87104e-12
						GLO: market for acetic acid, without water, in 98% solution state ecoinvent 3.5	4.54369e-07	4.53378e-07	5.23919e-07	8.01839e-07	3.64582e-07	5.25954e-07	3.67546e-07	3.64621e-07	5.86469e-07	2.11832e-07	1.88024e-07	4.84319e-07	1.83442e-07	2.61306e-07	5.67638e-07	5.40638e-07	4.95771e-07	4.73233e-07	8.73136e-07
						GLO: market for bromine ecoinvent 3.5	5.17157e-07	5.16554e-07	3.66364e-07	4.5616e-07	6.81165e-08	2.53374e-07	2.11582e-07	2.03784e-07	3.13554e-07	1.00338e-07	1.12043e-07	2.89697e-07	1.20936e-07	1.08459e-07	3.73365e-07	3.71714e-07	3.46504e-07	4.04313e-07	1.34786e-06
						RER: market for trifluoroacetic acid ecoinvent 3.5	3.02046e-07	3.01968e-07	4.45706e-07	3.60674e-07	2.87282e-07	5.1133e-07	3.91411e-07	3.58737e-07	5.92302e-07	3.20182e-07	2.03061e-07	4.70056e-07	2.42855e-07	2.50232e-07	3.82472e-07	3.80691e-07	5.76018e-07	4.50159e-07	9.56452e-07
					GLO: preparation of 9-Fluorenone <Mfg>		4.68094e-06	4.67352e-06	3.74902e-06	6.18029e-06	1.80813e-06	5.49606e-06	3.35307e-06	4.18546e-06	6.86066e-06	2.14975e-06	2.04224e-06	5.15205e-06	1.90652e-06	3.42107e-06	4.18059e-06	4.04532e-06	3.29258e-06	3.81338e-06	1.16313e-05
						EU-28: Electricity grid mix 1kV-60kV ts	5.95778e-09	5.92796e-09	1.69518e-09	6.34334e-09	1.62139e-09	5.3907e-11	3.28642e-11	5.20696e-11	1.41793e-10	2.32252e-09	8.70069e-09	1.10282e-10	1.95105e-09	1.65597e-09	3.4232e-09	3.4569e-09	4.043e-09	2.34136e-09	1.27045e-09
						RER: market for polycarboxylates, 40% active substance ecoinvent 3.5	4.65688e-06	4.64973e-06	3.55555e-06	6.10852e-06	1.68736e-06	5.42437e-06	3.32713e-06	4.15189e-06	6.75508e-06	2.13598e-06	2.00986e-06	5.06514e-06	1.89061e-06	3.36945e-06	4.109e-06	3.97417e-06	3.26316e-06	3.5343e-06	1.12685e-05
						RER: market for sulfuric acid ecoinvent 3.5	1.81061e-08	1.78593e-08	1.9177e-07	6.54231e-08	1.19143e-07	7.16409e-08	2.59073e-08	3.35172e-08	1.05438e-07	1.14441e-08	2.36757e-08	8.68008e-08	1.39564e-08	4.99635e-08	6.8164e-08	6.76918e-08	2.53791e-08	2.76736e-07	3.61575e-07
					EU-28: Electricity grid mix 1kV-60kV ts		3.6016e-05	3.58357e-05	1.02477e-05	3.83467e-05	9.80161e-06	3.25879e-07	1.98671e-07	3.14771e-07	8.57166e-07	1.40401e-05	5.25974e-05	6.66674e-07	1.17945e-05	1.00107e-05	2.06939e-05	2.08976e-05	2.44407e-05	1.4154e-05	7.68013e-06
					GLO: market for acetic acid, without water, in 98% solution state ecoinvent 3.5		3.94643e-06	3.93783e-06	4.55051e-06	6.96439e-06	3.16659e-06	4.56819e-06	3.19233e-06	3.16693e-06	5.09379e-06	1.83987e-06	1.63309e-06	4.20656e-06	1.59329e-06	2.26958e-06	4.93023e-06	4.69573e-06	4.30603e-06	4.11028e-06	7.58364e-06
					GLO: market for bromine ecoinvent 3.5		6.07198e-06	6.0649e-06	4.30151e-06	5.35581e-06	7.9976e-07	2.97488e-06	2.4842e-06	2.39265e-06	3.68146e-06	1.17808e-06	1.3155e-06	3.40136e-06	1.41992e-06	1.27342e-06	4.38371e-06	4.36432e-06	4.06833e-06	4.74707e-06	1.58253e-05
					GLO: market for iron (III) chloride, without water, in 40% solution state ecoinvent 3.5		1.1531e-08	1.13195e-08	1.86253e-08	1.04856e-08	7.13359e-09	2.84444e-08	1.79059e-08	1.98469e-08	4.17959e-08	6.03711e-09	1.05457e-08	2.63879e-08	1.03209e-08	2.2161e-08	1.61556e-08	1.62116e-08	2.24583e-08	1.46406e-08	6.36207e-08
					GLO: market for magnesium ecoinvent 3.5		0.0127436	0.0126531	0.0342111	0.0120196	0.000944661	0.0156769	0.0098952	0.00984836	0.0118644	0.00142489	0.00408926	0.0127172	0.00462558	0.096552	0.0170924	0.0160123	0.00483616	0.00851335	0.00529527
					GLO: market for water, ultrapure ecoinvent 3.5		7.79546e-06	7.78905e-06	8.65918e-06	7.17781e-06	6.20183e-06	6.2951e-06	1.33325e-05	7.80188e-06	6.48256e-06	1.54007e-06	9.68527e-06	1.16747e-05	1.22849e-05	5.61623e-06	2.61849e-05	2.61822e-05	7.61385e-06	8.51488e-06	8.65223e-05
					RER: market for ammonia, liquid ecoinvent 3.5		5.60722e-06	5.60072e-06	3.78183e-06	6.71566e-06	4.83368e-06	2.02586e-06	1.05297e-06	1.40565e-06	3.06656e-06	7.74586e-07	7.59088e-07	3.82057e-06	1.7291e-06	2.27423e-06	3.32432e-06	3.27052e-06	4.78149e-06	4.11181e-06	2.11042e-05
					RER: market for dichloromethane ecoinvent 3.5		2.54017e-06	2.54098e-06	2.90977e-06	1.73746e-06	2.2425e-07	1.13557e-06	9.84382e-08	1.89984e-06	3.70804e-07	3.02944e-09	1.1645e-08	1.00305e-06	2.24451e-08	7.60348e-09	5.05329e-06	5.07475e-06	9.49655e-05	3.46356e-06	5.31091e-07
					RER: market for diethyl ether, without water, in 99.95% solution state ecoinvent 3.5		0.0001851	0.000185033	0.000100492	0.000398288	4.97034e-05	0.000105207	0.000161129	9.33807e-05	0.000137622	1.85213e-05	6.71896e-05	9.94412e-05	2.51684e-05	7.73061e-05	0.000228919	0.000199815	3.32089e-05	0.000126586	0.000200443
					RER: market for hydrochloric acid, without water, in 30% solution state ecoinvent 3.5		7.79316e-10	7.8258e-10	1.15931e-09	1.03476e-09	8.76387e-10	1.82069e-09	1.40409e-09	1.23676e-09	2.21135e-09	1.45385e-09	8.61101e-10	1.66072e-09	9.39917e-10	9.68348e-10	9.53239e-10	9.52955e-10	1.88049e-09	1.41421e-09	3.32877e-09
				GLO: preparation of 3,4'-dimethoxydiphenylamine <Mfg>			0.0137087	0.0137517	0.0167443	0.00702931	0.00249064	0.00699806	0.0064599	0.00424805	0.00794106	0.00190362	0.0019402	0.00620708	0.00497136	0.0198081	0.00721713	0.00691699	0.0523866	0.0235015	0.00798885
					GLO: preparation dibenzylideneacetone (C17H14O) <Mfg>		4.9585e-06	4.9575e-06	3.71325e-06	8.70681e-06	2.27366e-06	3.84287e-06	4.60689e-06	3.27455e-06	4.57911e-06	1.41992e-06	2.55834e-06	3.92028e-06	1.93155e-06	2.37391e-06	6.93685e-06	6.4317e-06	3.11804e-06	4.07516e-06	1.1754e-05
						EU-28: Electricity grid mix 1kV-60kV ts	4.52724e-10	4.50458e-10	1.28814e-10	4.82022e-10	1.23207e-10	4.09632e-12	2.49731e-12	3.9567e-12	1.07747e-11	1.76485e-10	6.61154e-10	8.38015e-12	1.48258e-10	1.25835e-10	2.60124e-10	2.62685e-10	3.07222e-10	1.77917e-10	9.65399e-11
						GLO: market for ethyl acetate ecoinvent 3.5	3.81429e-07	3.81699e-07	3.73201e-07	6.09259e-07	1.90799e-07	3.62761e-07	2.91919e-07	2.6418e-07	4.49796e-07	9.8801e-08	1.99788e-07	3.30351e-07	1.15108e-07	2.11067e-07	4.92938e-07	4.60316e-07	2.81172e-07	3.86007e-07	7.38467e-07
						GLO: market for sodium hydroxide, without water, in 50% solution state ecoinvent 3.5	4.80846e-07	4.79041e-07	7.05925e-07	4.56285e-07	3.72356e-07	6.99901e-07	5.75883e-07	5.38929e-07	7.48257e-07	3.36376e-07	2.43163e-07	6.24382e-07	3.97823e-07	2.79379e-07	6.12773e-07	6.16551e-07	1.09899e-06	5.26576e-07	1.07344e-06
						GLO: market for solvent, organic ecoinvent 3.5	5.87038e-10	5.86334e-10	8.78354e-10	2.26185e-09	3.40293e-10	5.94963e-10	3.26691e-10	4.41881e-10	7.65861e-10	2.22984e-10	3.56316e-10	6.56593e-10	2.77445e-10	4.80906e-10	1.1923e-09	1.06722e-09	1.70483e-09	1.05475e-09	1.42096e-09
						GLO: market for water, ultrapure ecoinvent 3.5	4.18861e-07	4.18516e-07	4.65269e-07	3.85673e-07	3.33233e-07	3.38244e-07	7.16373e-07	4.19206e-07	3.48317e-07	8.27501e-08	5.20402e-07	6.27296e-07	6.60084e-07	3.01767e-07	1.40695e-06	1.40681e-06	4.09103e-07	4.57516e-07	4.64896e-06
						RER: market for acetone, liquid ecoinvent 3.5	1.2366e-07	1.23812e-07	8.78826e-08	2.03949e-07	4.61051e-08	4.54928e-08	3.11049e-08	4.99721e-08	3.53621e-08	1.39688e-08	1.17949e-08	4.21401e-08	1.13491e-08	1.42439e-08	1.63046e-07	1.46658e-07	1.32707e-08	1.15541e-07	7.64415e-08
						RER: market for benzaldehyde ecoinvent 3.5	7.79256e-07	7.80942e-07	5.52971e-07	1.14171e-06	5.94275e-07	8.10322e-07	6.09185e-07	5.96884e-07	9.30517e-07	6.04892e-07	5.25318e-07	7.43205e-07	3.67977e-07	4.03903e-07	7.42806e-07	7.11532e-07	7.74366e-07	6.76484e-07	1.49742e-06
						RER: market for ethanol, without water, in 99.7% solution state, from ethylene ecoinvent 3.5	2.77341e-06	2.77246e-06	1.52699e-06	5.90719e-06	7.36432e-07	1.58555e-06	2.3821e-06	1.40493e-06	2.06608e-06	2.82732e-07	1.05685e-06	1.55224e-06	3.78786e-07	1.16294e-06	3.51688e-06	3.08851e-06	5.39125e-07	1.91181e-06	3.7178e-06
					GLO: preparation of 4-bromoaniline <Mfg>		0.000743935	0.00074238	0.000672983	0.000802261	0.000226489	0.000574502	0.000406404	0.000424341	0.000664384	0.000196228	0.00020602	0.000525981	0.000518392	0.000349244	0.000730033	0.000702368	0.0112453	0.000791543	0.00165909
						GLO: market for bromine ecoinvent 3.5	0.00034862	0.000348213	0.000246969	0.000307501	4.59178e-05	0.000170801	0.000142629	0.000137372	0.000211369	6.76388e-05	7.5529e-05	0.000195287	8.15241e-05	7.31127e-05	0.000251688	0.000250575	0.000233581	0.000272551	0.000908601
						RER: market for aniline ecoinvent 3.5	0.000395316	0.000394167	0.000426014	0.00049476	0.000180572	0.000403701	0.000263775	0.000286968	0.000453015	0.000128589	0.000130491	0.000330694	0.000436868	0.000276131	0.000478345	0.000451793	0.0110117	0.000518992	0.000750486
					GLO: preparation of palladium chloride PdCl2 <Mfg>		0.000207435	0.000206207	0.0117504	0.000216267	6.14301e-05	0.00323515	0.000957795	0.000636026	0.00402103	8.55708e-05	0.000106526	0.00279486	0.000266893	0.0166129	0.000379252	0.000381891	0.000661292	0.0174234	0.0010772
						GLO: preparation of Aqua regia <Mfg>	3.07696e-08	3.07912e-08	2.69006e-08	1.99539e-08	1.61353e-08	3.40268e-08	2.36991e-08	2.14151e-08	4.36692e-08	2.23263e-08	1.43142e-08	3.2234e-08	1.91779e-08	3.038e-08	3.14609e-08	3.16587e-08	1.23029e-06	3.87504e-08	7.03409e-08
						GLO: preparation of Aqua regia <Mfg>	1.14191e-08	1.1467e-08	1.69871e-08	1.51622e-08	1.28415e-08	2.66781e-08	2.05738e-08	1.8122e-08	3.24024e-08	2.1303e-08	1.26175e-08	2.43341e-08	1.37724e-08	1.4189e-08	1.39676e-08	1.39634e-08	2.75544e-08	2.07221e-08	4.87758e-08
						GLO: preparation of Aqua regia <Mfg>	1.93505e-08	1.93243e-08	9.91345e-09	4.79173e-09	3.29384e-09	7.34871e-09	3.12528e-09	3.2931e-09	1.12668e-08	1.02337e-09	1.69663e-09	7.89987e-09	5.40549e-09	1.6191e-08	1.74933e-08	1.76952e-08	1.20273e-06	1.80283e-08	2.15651e-08
						EU-28: Electricity grid mix 1kV-60kV ts	3.6016e-08	3.58357e-08	1.02477e-08	3.83467e-08	9.80161e-09	3.25879e-10	1.98671e-10	3.14771e-10	8.57166e-10	1.40401e-08	5.25974e-08	6.66674e-10	1.17945e-08	1.00107e-08	2.06939e-08	2.08976e-08	2.44407e-08	1.4154e-08	7.68013e-09
						GLO: market for palladium ecoinvent 3.5	0.000207368	0.000206141	0.0117504	0.000216209	6.14041e-05	0.00323511	0.000957771	0.000636004	0.00402099	8.55344e-05	0.000106459	0.00279482	0.000266862	0.0166128	0.0003792	0.000381839	0.000660037	0.0174233	0.00107712
					GLO: preparation of sodium acetate <Mfg>		4.82838e-07	4.81524e-07	6.09058e-07	7.16603e-07	3.84424e-07	6.08404e-07	4.55127e-07	4.4045e-07	6.67275e-07	2.63858e-07	2.15063e-07	5.53294e-07	2.65281e-07	2.78698e-07	6.07368e-07	5.89849e-07	7.2516e-07	5.11783e-07	9.7943e-07
						GLO: market for acetic acid, without water, in 98% solution state ecoinvent 3.5	3.16773e-07	3.16082e-07	3.65261e-07	5.59019e-07	2.54176e-07	3.6668e-07	2.56242e-07	2.54203e-07	4.08869e-07	1.47683e-07	1.31085e-07	3.37653e-07	1.27891e-07	1.82175e-07	3.95741e-07	3.76917e-07	3.45637e-07	3.29925e-07	6.08725e-07
						GLO: market for sodium hydroxide, without water, in 50% solution state ecoinvent 3.5	1.66035e-07	1.65411e-07	2.43754e-07	1.57554e-07	1.28573e-07	2.41674e-07	1.98851e-07	1.86091e-07	2.58371e-07	1.1615e-07	8.39636e-08	2.15597e-07	1.37367e-07	9.64687e-08	2.11589e-07	2.12893e-07	3.79479e-07	1.81825e-07	3.70656e-07
						GLO: market group for tap water ecoinvent 3.5	3.06542e-11	3.06779e-11	4.28369e-11	3.03435e-11	1.67384e-09	4.96383e-11	3.44205e-11	1.55893e-10	3.46122e-11	2.55554e-11	1.3993e-11	4.39348e-11	2.27836e-11	5.46135e-11	3.84843e-11	3.83131e-11	4.28389e-11	3.31544e-11	4.83944e-11
					GLO: preparation of sodium tert-butoxide <Mfg>		0.000273316	0.000273808	0.000273329	0.000428583	0.000280327	0.000230998	0.000179712	0.000189057	0.000262033	0.000103736	0.000129405	0.000213372	0.000112405	0.00010044	0.000326493	0.00030986	0.000177684	0.00027148	0.000389326
						GLO: market for 1-butanol ecoinvent 3.5	0.000226957	0.000227589	0.000216865	0.000385508	0.000263029	0.000169393	0.000132174	0.000142171	0.000187294	7.61854e-05	0.000104438	0.000155094	6.65098e-05	6.87623e-05	0.000271444	0.000254656	0.000141246	0.000222416	0.000244437
						GLO: market for sodium ecoinvent 3.5	4.63589e-05	4.62187e-05	5.64642e-05	4.30746e-05	1.72983e-05	6.16041e-05	4.75379e-05	4.6886e-05	7.47395e-05	2.75502e-05	2.49676e-05	5.82777e-05	4.58956e-05	3.16775e-05	5.50485e-05	5.52048e-05	3.64388e-05	4.90644e-05	0.000144889
					GLO: preparation of tri-tert-butylphosphine <Mfg>		3.32227e-05	3.30245e-05	4.47737e-05	3.8913e-05	1.42096e-05	3.73883e-05	0.000204143	3.11856e-05	3.73806e-05	2.11702e-05	2.18841e-05	3.26827e-05	4.65604e-05	0.000230724	3.88019e-05	3.87746e-05	3.10409e-05	3.70277e-05	4.24739e-05
						GLO: market for phosphane ecoinvent 3.5	1.85011e-05	1.83337e-05	2.99625e-05	2.15565e-05	6.32462e-06	2.3436e-05	0.000194546	2.02499e-05	2.06181e-05	1.62809e-05	1.74077e-05	1.981e-05	1.73548e-05	0.000223631	2.48616e-05	2.50255e-05	1.86003e-05	2.15769e-05	1.68758e-05
						GLO: market for tert-butyl amine ecoinvent 3.5	1.60172e-05	1.59837e-05	1.5776e-05	1.8815e-05	8.94943e-06	1.44774e-05	9.8333e-06	1.12687e-05	1.74738e-05	4.99048e-06	4.64917e-06	1.3686e-05	2.96016e-05	7.60632e-06	1.47921e-05	1.45826e-05	1.34049e-05	1.64635e-05	3.04288e-05
						RoW: market for ammonia, liquid ecoinvent 3.5	-1.29556e-06	-1.29292e-06	-9.64769e-07	-1.45844e-06	-1.06445e-06	-5.25053e-07	-2.36482e-07	-3.33004e-07	-7.11304e-07	-1.01176e-07	-1.72801e-07	-8.13295e-07	-3.96042e-07	-5.12558e-07	-8.51835e-07	-8.33457e-07	-9.6436e-07	-1.01263e-06	-4.83071e-06
					EU-28: Electricity grid mix 1kV-60kV ts		0.000179558	0.000178659	5.10899e-05	0.000191178	4.8866e-05	1.62467e-06	9.90475e-07	1.56929e-06	4.27341e-06	6.9997e-05	0.000262225	3.32371e-06	5.88016e-05	4.99084e-05	0.00010317	0.000104185	0.00012185	7.05649e-05	3.82894e-05
					Europe without Switzerland: market for spent solvent mixture ecoinvent 3.5		0.00947816	0.00951869	0.00160242	0.000951581	0.000393505	0.00101488	0.00323312	0.00129351	0.00113925	0.00029198	0.000533647	0.000962779	0.00286509	0.000591759	0.00215586	0.00216684	0.0055532	0.0020397	0.00183849
					Europe without Switzerland: treatment of wastewater, average, capacity 1E9l/year ecoinvent 3.5		4.54619e-07	6.34771e-07	7.79641e-07	3.57188e-07	-2.47106e-05	2.53411e-06	2.15332e-06	2.13598e-06	2.9455e-06	3.30238e-07	5.81698e-07	2.20992e-06	7.92781e-05	1.74101e-06	8.41794e-07	8.38548e-07	2.73717e-06	9.59367e-07	1.80525e-06
					Europe without Switzerland: water production, deionised, from tap water, at user ecoinvent 3.5		1.5799e-06	1.99075e-06	2.00644e-06	1.93065e-06	5.43064e-05	3.19301e-06	2.63099e-06	6.33969e-06	2.67483e-06	3.11169e-06	1.27688e-06	2.81339e-06	1.62701e-06	2.41562e-06	1.87502e-06	1.87008e-06	3.03531e-06	2.16661e-06	3.52356e-06
					GLO: diethyl ether production ecoinvent 3.5		5.48217e-05	5.4554e-05	9.65665e-05	7.38169e-05	5.15712e-05	8.82246e-05	6.74545e-05	5.8868e-05	0.000122485	2.78435e-05	2.88283e-05	8.31404e-05	3.51789e-05	5.41747e-05	8.20298e-05	7.95471e-05	8.85376e-05	0.000109781	0.000264639
					GLO: market for chemical, organic ecoinvent 3.5		0.000123717	0.000123486	0.000104057	0.000239633	7.69535e-05	8.07993e-05	5.78683e-05	7.36717e-05	8.71861e-05	2.15568e-05	2.64712e-05	7.54072e-05	3.49471e-05	3.71473e-05	0.00015549	0.00013992	5.48401e-05	0.000102707	0.000150113
					GLO: market for ethyl acetate ecoinvent 3.5		0.000210199	0.000210348	0.000205665	0.000335753	0.000105146	0.000199912	0.000160872	0.000145585	0.000247875	5.44476e-05	0.0001101	0.000182051	6.34343e-05	0.000116316	0.00027165	0.000253672	0.000154949	0.000212722	0.000406957
					GLO: market for magnesium sulfate ecoinvent 3.5		6.30281e-05	6.31558e-05	0.000106205	6.26506e-05	1.37497e-05	7.11953e-05	6.72825e-05	5.98524e-05	5.452e-05	5.60821e-05	3.07679e-05	6.33196e-05	3.35395e-05	0.00113246	0.000114415	0.000115101	6.56769e-05	7.95685e-05	9.06695e-05
					GLO: market for methanol ecoinvent 3.5		5.30079e-06	5.30273e-06	3.20291e-06	1.56471e-05	9.83842e-07	3.55776e-06	1.89685e-06	2.03776e-06	4.87646e-06	5.45869e-07	6.38148e-07	3.55153e-06	8.06327e-07	2.52187e-06	5.33796e-06	5.06694e-06	5.89912e-06	3.68758e-06	3.88036e-06
					GLO: market group for tap water ecoinvent 3.5		3.57632e-07	3.57908e-07	4.99764e-07	3.54007e-07	1.95281e-05	5.79114e-07	4.01572e-07	1.81875e-06	4.03809e-07	2.98147e-07	1.63252e-07	5.12573e-07	2.65809e-07	6.37158e-07	4.48984e-07	4.46986e-07	4.99787e-07	3.86801e-07	5.64601e-07
					RER: market for acetone, liquid ecoinvent 3.5		0.00155368	0.00155559	0.00110417	0.00256244	0.00057927	0.000571576	0.000390805	0.000627854	0.000444292	0.000175505	0.000148192	0.000529453	0.000142592	0.000178962	0.00204853	0.00184262	0.000166735	0.00145166	0.000960419
					RER: market for acetone, liquid ecoinvent 3.5		-5.51716e-05	-5.52393e-05	-3.92091e-05	-9.09928e-05	-2.057e-05	-2.02968e-05	-1.38776e-05	-2.22952e-05	-1.57769e-05	-6.23221e-06	-5.26232e-06	-1.8801e-05	-5.06346e-06	-6.35497e-06	-7.27436e-05	-6.54318e-05	-5.92078e-06	-5.15489e-05	-3.41047e-05
					RER: market for aniline ecoinvent 3.5		0.000437512	0.000436241	0.000471487	0.000547571	0.000199846	0.000446793	0.000291931	0.0003176	0.000501371	0.000142315	0.00014442	0.000365993	0.000483499	0.000305606	0.000529405	0.000500018	0.0121871	0.00057439	0.000830594
					RER: market for nitrogen, liquid ecoinvent 3.5		0.000199833	0.000204426	0.000217402	0.00028285	0.000301777	0.000401525	0.00042028	0.000276647	0.000283841	0.000633024	0.000177668	0.000331128	0.000214865	3.13863e-05	0.000199354	0.000200778	0.000232113	0.000283471	0.000169917
					RER: market for toluene, liquid ecoinvent 3.5		0.000149976	0.000150245	5.9035e-05	0.00033381	9.59097e-05	2.4479e-05	2.47006e-06	3.40792e-05	7.17383e-06	5.38678e-07	3.26079e-06	2.41837e-05	3.54257e-06	1.71737e-06	0.000124998	0.000117326	2.69875e-06	7.75798e-05	4.59244e-05
					RER: market for trichloromethane ecoinvent 3.5		4.23192e-05	4.24098e-05	1.31296e-05	2.52774e-05	9.39193e-06	2.49955e-05	2.05032e-05	8.44541e-05	6.35882e-05	2.38828e-05	1.06098e-05	2.46479e-05	1.25116e-05	1.17903e-05	1.43444e-05	1.42819e-05	0.0216336	1.5652e-05	3.63412e-05
				GLO: preparation of sodium tert-butoxide <Mfg>			0.000131334	0.00013157	0.00013134	0.000205942	0.000134703	0.000110999	8.63551e-05	9.08455e-05	0.000125912	4.98469e-05	6.21819e-05	0.000102529	5.4013e-05	4.82633e-05	0.000156886	0.000148894	8.53808e-05	0.000130452	0.000187079
					GLO: market for 1-butanol ecoinvent 3.5		0.000109057	0.000109361	0.000104208	0.000185244	0.00012639	8.13969e-05	6.35123e-05	6.83159e-05	8.99983e-05	3.66086e-05	5.01844e-05	7.45259e-05	3.19593e-05	3.30416e-05	0.000130434	0.000122367	6.78712e-05	0.000106875	0.000117457
					GLO: market for sodium ecoinvent 3.5		2.22764e-05	2.2209e-05	2.71322e-05	2.06982e-05	8.31215e-06	2.9602e-05	2.28429e-05	2.25296e-05	3.59138e-05	1.32384e-05	1.19974e-05	2.80036e-05	2.20537e-05	1.52217e-05	2.64519e-05	2.6527e-05	1.75095e-05	2.35764e-05	6.96221e-05
				GLO: preparation of tri-tert-butylphosphine <Mfg>			3.34137e-05	3.32143e-05	4.5031e-05	3.91366e-05	1.42913e-05	3.76032e-05	0.000205316	3.13648e-05	3.75954e-05	2.12919e-05	2.20098e-05	3.28705e-05	4.68279e-05	0.00023205	3.90249e-05	3.89975e-05	3.12193e-05	3.72405e-05	4.2718e-05
					GLO: market for phosphane ecoinvent 3.5		1.86074e-05	1.84391e-05	3.01347e-05	2.16803e-05	6.36097e-06	2.35706e-05	0.000195664	2.03662e-05	2.07366e-05	1.63745e-05	1.75077e-05	1.99238e-05	1.74545e-05	0.000224916	2.50045e-05	2.51693e-05	1.87072e-05	2.17009e-05	1.69728e-05
					GLO: market for tert-butyl amine ecoinvent 3.5		1.61092e-05	1.60756e-05	1.58666e-05	1.89231e-05	9.00086e-06	1.45606e-05	9.88981e-06	1.13335e-05	1.75742e-05	5.01916e-06	4.67589e-06	1.37647e-05	2.97717e-05	7.65003e-06	1.48771e-05	1.46664e-05	1.3482e-05	1.65581e-05	3.06037e-05
					RoW: market for ammonia, liquid ecoinvent 3.5		-1.30301e-06	-1.30035e-06	-9.70313e-07	-1.46682e-06	-1.07057e-06	-5.28071e-07	-2.37841e-07	-3.34917e-07	-7.15392e-07	-1.01757e-07	-1.73794e-07	-8.1797e-07	-3.98318e-07	-5.15504e-07	-8.56731e-07	-8.38247e-07	-9.69902e-07	-1.01845e-06	-4.85847e-06
				EU-28: Electricity grid mix 1kV-60kV ts			4.3926e-05	4.37062e-05	1.24983e-05	4.67687e-05	1.19543e-05	3.9745e-07	2.42304e-07	3.83903e-07	1.04542e-06	1.71236e-05	6.41492e-05	8.13093e-07	1.43849e-05	1.22093e-05	2.52388e-05	2.54873e-05	2.98086e-05	1.72626e-05	9.36688e-06
				Europe without Switzerland: water production, deionised, from tap water, at user ecoinvent 3.5			1.50011e-06	1.89021e-06	1.90511e-06	1.83315e-06	5.15637e-05	3.03175e-06	2.49811e-06	6.0195e-06	2.53974e-06	2.95453e-06	1.21239e-06	2.6713e-06	1.54484e-06	2.29362e-06	1.78032e-06	1.77563e-06	2.88201e-06	2.05719e-06	3.3456e-06
				GLO: market for chemical, organic ecoinvent 3.5			0.000124559	0.000124326	0.000104765	0.000241263	7.7477e-05	8.13489e-05	5.8262e-05	7.41729e-05	8.77792e-05	2.17034e-05	2.66513e-05	7.59202e-05	3.51849e-05	3.74e-05	0.000156548	0.000140872	5.52132e-05	0.000103406	0.000151134
				GLO: market for ethyl acetate ecoinvent 3.5			0.000199571	0.000199713	0.000195266	0.000318777	9.98301e-05	0.000189804	0.000152738	0.000138224	0.000235342	5.16947e-05	0.000104533	0.000172846	6.02269e-05	0.000110435	0.000257915	0.000240846	0.000147115	0.000201966	0.000386381
				GLO: market for magnesium sulfate ecoinvent 3.5			5.98468e-05	5.99682e-05	0.000100845	5.94885e-05	1.30557e-05	6.76018e-05	6.38865e-05	5.68314e-05	5.17682e-05	5.32514e-05	2.92149e-05	6.01236e-05	3.18466e-05	0.0010753	0.00010864	0.000109291	6.23619e-05	7.55524e-05	8.60931e-05
				RER: market for nitrogen, liquid ecoinvent 3.5			0.000190112	0.000194481	0.000206825	0.00026909	0.000287096	0.000381991	0.000399834	0.000263188	0.000270032	0.000602229	0.000169025	0.000315019	0.000204412	2.98594e-05	0.000189656	0.00019101	0.000220821	0.00026968	0.000161651
				RER: market for toluene, liquid ecoinvent 3.5			0.000150694	0.000150964	5.93175e-05	0.000335407	9.63686e-05	2.45962e-05	2.48188e-06	3.42422e-05	7.20815e-06	5.41256e-07	3.27639e-06	2.42994e-05	3.55952e-06	1.72558e-06	0.000125596	0.000117887	2.71166e-06	7.7951e-05	4.61441e-05
			DE: Electricity grid mix 1kV-60kV ts				0.00014447	0.000143779	2.66082e-05	0.000110976	1.69718e-05	1.11048e-06	1.22381e-06	1.01563e-06	3.46793e-06	1.42254e-05	0.00028314	2.40437e-06	6.36066e-05	5.71429e-05	7.56041e-05	7.64912e-05	0.00015098	3.68818e-05	3.4185e-05
			DE: Nitrogen (liquid) ts				5.89862e-06	5.85253e-06	1.0848e-06	4.5122e-06	7.25352e-07	4.53258e-08	5e-08	4.14063e-08	1.41568e-07	5.80282e-07	1.15116e-05	9.81785e-08	2.59016e-06	2.33498e-06	3.084e-06	3.11111e-06	6.12745e-06	1.502e-06	1.39203e-06
			DE: Tap water from groundwater ts				2.53456e-06	2.71889e-06	7.07602e-07	2.09146e-06	0.000838028	6.60057e-07	6.52381e-07	5.9375e-07	1.3658e-06	7.26761e-08	1.65116e-06	6.08379e-07	9.08197e-06	0.000124138	1.6916e-06	1.7076e-06	4.02451e-06	7.77872e-07	5.14619e-07
			DE: Tap water from groundwater ts				-1.89862e-06	-2.04147e-06	-5.30702e-07	-1.56707e-06	-0.000629577	-4.95751e-07	-4.90476e-07	-4.45312e-07	-1.02375e-06	-5.4507e-08	-1.23837e-06	-4.57195e-07	-6.81967e-06	-9.31034e-05	-1.26582e-06	-1.27485e-06	-3.01961e-06	-5.83404e-07	-3.85964e-07
			EU-28: Compressed air ts				1.20759e-05	1.20156e-05	3.44812e-06	1.28835e-05	3.30596e-06	1.09351e-07	6.62332e-08	1.05683e-07	2.87506e-07	4.73103e-06	1.75551e-05	2.23759e-07	3.93825e-06	3.34479e-06	6.94822e-06	7.01659e-06	8.16919e-06	4.76242e-06	2.5742e-06
		DE: B.06 - perovskite depostion (evaporation) -rev5- (008*) <Mfg>					0.011958	0.011896	0.00232502	0.00918283	0.0146255	0.000236505	0.000199742	0.000184789	0.000644045	0.00120227	0.0230322	0.000344113	0.00536098	0.0277248	0.00631896	0.00638801	0.0139468	0.00319375	0.00318537
			DE: preparation of lead iodide (008*) <Mfg>				0.000170363	0.000170294	0.00013632	0.000132643	2.21539e-05	0.000126495	8.24415e-05	8.55086e-05	0.000329336	3.12316e-05	7.65302e-05	0.000127862	5.07355e-05	0.0173297	0.000142489	0.000142524	0.001634	0.000169075	0.000357446
				DE: preparation of lead nitrate (008*) <Mfg>			5.32465e-05	5.32327e-05	5.98182e-05	2.97102e-05	8.60669e-06	7.37253e-05	3.76852e-05	4.2016e-05	0.000266794	6.75082e-06	2.34038e-05	6.88085e-05	2.1524e-05	0.000315171	5.72326e-05	5.74647e-05	0.00155407	8.56971e-05	0.000131506
					DE: Electricity grid mix 1kV-60kV ts		4.94305e-06	4.91565e-06	9.10555e-07	3.78773e-06	5.80942e-07	3.79856e-08	4.18898e-08	3.46658e-08	1.18725e-07	4.8709e-07	9.67075e-06	8.23335e-08	2.17416e-06	1.95488e-06	2.58511e-06	2.61419e-06	5.16294e-06	1.26094e-06	1.16874e-06
					DE: Nitrogen (gaseous) ts		2.21768e-07	2.20556e-07	4.08659e-08	1.6994e-07	2.9217e-08	1.71657e-09	1.89125e-09	1.56621e-09	5.35286e-09	2.18475e-08	4.33769e-07	3.7052e-09	9.77041e-08	8.82279e-08	1.16029e-07	1.17334e-07	2.31642e-07	5.6588e-08	5.2436e-08
					GLO: market for lead ecoinvent 3.5		9.42673e-06	9.42524e-06	3.94659e-05	7.01562e-06	3.27934e-06	6.15599e-05	3.06342e-05	3.48094e-05	0.000249658	2.70946e-06	7.80603e-06	5.446e-05	1.08455e-05	0.000291894	2.39892e-05	2.39914e-05	1.99741e-05	5.26377e-05	8.79185e-05
					RER: nitric acid production, product in 50% solution state ecoinvent 3.5		2.4429e-05	2.43958e-05	1.24906e-05	6.00852e-06	4.16204e-06	9.25553e-06	3.94125e-06	4.13231e-06	1.42089e-05	1.28371e-06	2.07008e-06	9.89307e-06	6.83047e-06	2.04595e-05	2.1976e-05	2.2232e-05	0.00152186	2.27584e-05	2.63952e-05
					RER: steam production, in chemical industry ecoinvent 3.5		1.4226e-05	1.42754e-05	6.91018e-06	1.27284e-05	5.55152e-07	2.87023e-06	3.06596e-06	3.03804e-06	2.80271e-06	2.24871e-06	3.42318e-06	4.36946e-06	1.57615e-06	7.74428e-07	8.56628e-06	8.5099e-06	6.84271e-06	8.98344e-06	1.59711e-05
				DE: preparation of potassium iodide (008*) <Mfg>			9.22847e-05	9.22037e-05	6.64339e-05	8.15645e-05	1.2055e-05	4.90429e-05	4.0774e-05	3.95557e-05	5.87945e-05	2.09494e-05	3.58031e-05	5.33483e-05	2.42838e-05	0.0170109	7.08275e-05	7.0664e-05	6.42636e-05	7.01868e-05	0.000203923
					DE: Electricity grid mix 1kV-60kV ts		4.95508e-06	4.92761e-06	9.12771e-07	3.79695e-06	5.82356e-07	3.8078e-08	4.19917e-08	3.47502e-08	1.19014e-07	4.88275e-07	9.69428e-06	8.25338e-08	2.17945e-06	1.95964e-06	2.5914e-06	2.62055e-06	5.1755e-06	1.26401e-06	1.17158e-06
					DE: Nitrogen (gaseous) ts		2.22308e-07	2.21093e-07	4.09653e-08	1.70353e-07	2.92881e-08	1.72074e-09	1.89585e-09	1.57003e-09	5.36588e-09	2.19007e-08	4.34824e-07	3.71421e-09	9.79418e-08	8.84426e-08	1.16311e-07	1.17619e-07	2.32206e-07	5.67257e-08	5.25636e-08
					GLO: market for iodine ecoinvent 3.5		6.01512e-05	6.00805e-05	4.23531e-05	5.28699e-05	7.48448e-06	2.91467e-05	2.43765e-05	2.37311e-05	3.56526e-05	1.15474e-05	1.32173e-05	3.35433e-05	1.39879e-05	0.0169991	4.45712e-05	4.43859e-05	4.03334e-05	4.64676e-05	0.000158662
					GLO: market for potassium hydroxide ecoinvent 3.5		1.26956e-05	1.26643e-05	1.62001e-05	1.19678e-05	3.40235e-06	1.69791e-05	1.32802e-05	1.27429e-05	2.02081e-05	6.63771e-06	9.02518e-06	1.53387e-05	6.43851e-06	8.97445e-06	1.49614e-05	1.50093e-05	1.16631e-05	1.33932e-05	2.80271e-05
					RER: steam production, in chemical industry ecoinvent 3.5		1.42606e-05	1.43101e-05	6.927e-06	1.27594e-05	5.56502e-07	2.87721e-06	3.07342e-06	3.04544e-06	2.80953e-06	2.25418e-06	3.43151e-06	4.38009e-06	1.57998e-06	7.76313e-07	8.58713e-06	8.5306e-06	6.85936e-06	9.00529e-06	1.601e-05
				DE: Electricity grid mix 1kV-60kV ts			6.32999e-06	6.2949e-06	1.16604e-06	4.85051e-06	7.43945e-07	4.86437e-08	5.36434e-08	4.43925e-08	1.52037e-07	6.23759e-07	1.23842e-05	1.05435e-07	2.7842e-06	2.50339e-06	3.31044e-06	3.34769e-06	6.61157e-06	1.61474e-06	1.49667e-06
				DE: Nitrogen (gaseous) ts			2.83993e-07	2.82441e-07	5.23321e-08	2.17622e-07	3.74149e-08	2.19821e-09	2.4219e-09	2.00567e-09	6.85478e-09	2.79776e-08	5.55477e-07	4.74482e-09	1.25118e-07	1.12983e-07	1.48584e-07	1.50256e-07	2.96637e-07	7.24656e-08	6.71487e-08
				RER: steam production, in chemical industry ecoinvent 3.5			1.82176e-05	1.82808e-05	8.84907e-06	1.62998e-05	7.10918e-07	3.67556e-06	3.92621e-06	3.89047e-06	3.5891e-06	2.87967e-06	4.38367e-06	5.59546e-06	2.01839e-06	9.9172e-07	1.09698e-05	1.08976e-05	8.76267e-06	1.1504e-05	2.04524e-05
			DE: preparation of methylamonium iodide (CH3NH3I) (008*) <Mfg>				2.31734e-05	2.31645e-05	1.42585e-05	2.25807e-05	3.72765e-06	9.448e-06	7.74436e-06	7.63637e-06	1.15975e-05	4.43132e-06	8.67233e-06	1.13038e-05	1.40823e-05	0.00380436	1.62329e-05	1.60905e-05	1.58909e-05	1.67436e-05	4.84506e-05
				DE: preparation of hydriodic acid (57% in H2O) (008*) <Mfg>			2.06024e-05	2.05945e-05	1.23738e-05	1.80294e-05	2.18619e-06	7.60862e-06	6.60745e-06	6.4549e-06	9.06633e-06	3.612e-06	7.92269e-06	9.15486e-06	4.55513e-06	0.00380295	1.41331e-05	1.40804e-05	1.35322e-05	1.41928e-05	4.18065e-05
					DE: Electricity grid mix 1kV-60kV ts		1.81041e-06	1.80038e-06	3.33495e-07	1.38727e-06	2.12773e-07	1.39124e-08	1.53423e-08	1.26965e-08	4.34836e-08	1.78399e-07	3.54195e-06	3.0155e-08	7.96298e-07	7.15985e-07	9.46807e-07	9.57459e-07	1.89095e-06	4.61824e-07	4.28055e-07
					DE: Nitrogen (gaseous) ts		8.12236e-08	8.07798e-08	1.49673e-08	6.22413e-08	1.07009e-08	6.287e-10	6.92678e-10	5.73633e-10	1.96051e-09	8.00175e-09	1.5887e-07	1.35705e-09	3.57846e-08	3.23139e-08	4.2496e-08	4.2974e-08	8.484e-08	2.07256e-08	1.92049e-08
					DE: Water (desalinated; deionised) ts		2.97798e-09	3.03602e-09	8.21766e-10	2.56173e-09	5.89794e-08	2.53837e-10	2.47259e-10	2.25369e-10	5.48249e-10	2.01385e-10	4.1025e-09	2.55434e-10	4.35443e-09	1.11921e-08	2.44616e-09	2.46494e-09	3.43161e-09	1.07606e-09	5.76218e-10
					GLO: market for iodine ecoinvent 3.5		1.3453e-05	1.34372e-05	9.47239e-06	1.18245e-05	1.67393e-06	6.51875e-06	5.45188e-06	5.30753e-06	7.9738e-06	2.5826e-06	2.95608e-06	7.50205e-06	3.12843e-06	0.0038019	9.96849e-06	9.92704e-06	9.02069e-06	1.03926e-05	3.54853e-05
					RER: market for hydrogen, liquid ecoinvent 3.5		4.45184e-08	4.46808e-08	2.12711e-08	9.09728e-08	2.64799e-08	2.38428e-08	1.63656e-08	2.1178e-08	2.00344e-08	1.91949e-08	7.92772e-09	2.07041e-08	1.2987e-08	6.915e-09	3.54338e-08	3.36463e-08	2.61199e-08	2.62981e-08	2.39112e-08
					RER: steam production, in chemical industry ecoinvent 3.5		5.21033e-06	5.22842e-06	2.53089e-06	4.66184e-06	2.03327e-07	1.05123e-06	1.12292e-06	1.1127e-06	1.0265e-06	8.23601e-07	1.25376e-06	1.60033e-06	5.77271e-07	2.83638e-07	3.13744e-06	3.11679e-06	2.50617e-06	3.29022e-06	5.84949e-06
				GLO: market for methanol ecoinvent 3.5			1.61357e-07	1.61416e-07	9.74975e-08	4.76301e-07	2.99484e-08	1.08299e-07	5.77405e-08	6.20301e-08	1.48441e-07	1.66164e-08	1.94254e-08	1.0811e-07	2.45448e-08	7.67663e-08	1.62489e-07	1.54239e-07	1.79571e-07	1.12251e-07	1.18119e-07
				RER: market for methylamine ecoinvent 3.5			2.40958e-06	2.40855e-06	1.7872e-06	4.07495e-06	1.51152e-06	1.73108e-06	1.07917e-06	1.11944e-06	2.38275e-06	8.02705e-07	7.30217e-07	2.04084e-06	9.50268e-06	1.3324e-06	1.93731e-06	1.85584e-06	2.17912e-06	2.43854e-06	6.52598e-06
			DE: Electricity grid mix 1kV-60kV ts				0.0113192	0.0112565	0.0020851	0.00867361	0.00133031	8.6984e-05	9.59244e-05	7.93821e-05	0.000271871	0.0011154	0.0221453	0.000188537	0.00497867	0.00447653	0.00591969	0.00598629	0.0118227	0.00288745	0.00267632
			DE: Nitrogen (liquid) ts				0.000370907	0.000368862	6.8333e-05	0.00028422	4.54786e-05	2.85769e-06	3.15036e-06	2.60774e-06	8.92441e-06	3.6546e-05	0.000725592	6.18477e-06	0.000163237	0.000147	0.000194006	0.000196188	0.000387412	9.46258e-05	8.76981e-05
			DE: Tap water from groundwater ts				0.000159522	0.000171439	4.46145e-05	0.000131871	0.0528573	4.16312e-05	4.11686e-05	3.74109e-05	8.59756e-05	4.58199e-06	0.000104057	3.83424e-05	0.000572023	0.00783077	0.000106745	0.00010747	0.000253624	4.90059e-05	3.2421e-05
			DE: Tap water from groundwater ts				-0.000119641	-0.000128579	-3.34609e-05	-9.89035e-05	-0.039643	-3.12234e-05	-3.08764e-05	-2.80582e-05	-6.44817e-05	-3.43649e-06	-7.80428e-05	-2.87568e-05	-0.000429017	-0.00587308	-8.00588e-05	-8.06022e-05	-0.000190218	-3.67544e-05	-2.43158e-05
			EU-28: Compressed air ts				3.45027e-05	3.43304e-05	9.85176e-06	3.68101e-05	9.44559e-06	3.12431e-07	1.89238e-07	3.01952e-07	8.21446e-07	1.35172e-05	5.01573e-05	6.39312e-07	1.12521e-05	9.55655e-06	1.98521e-05	2.00474e-05	2.33406e-05	1.36069e-05	7.35487e-06
		DE: B.07 - curing (perovskite layer) -rev4- (001) <Mfg>					0.00170358	0.00169463	0.000321359	0.0013265	0.00212804	1.46519e-05	1.56752e-05	1.33839e-05	4.38832e-05	0.000187701	0.00329069	2.97994e-05	0.000759666	0.000947376	0.000895394	0.000905395	0.00175712	0.000444483	0.000400996
			DE: Electricity grid mix 1kV-60kV ts				0.00162878	0.00161975	0.000300037	0.00124809	0.000191426	1.25166e-05	1.38031e-05	1.14227e-05	3.9121e-05	0.000160501	0.0031866	2.71297e-05	0.000716408	0.000644153	0.000851817	0.000861401	0.00170124	0.000415491	0.00038511
			DE: Tap water from groundwater ts				2.31505e-05	2.488e-05	6.47466e-06	1.91378e-05	0.00767091	6.04172e-06	5.97458e-06	5.42925e-06	1.24772e-05	6.6496e-07	1.51013e-05	5.56443e-06	8.30146e-05	0.00113644	1.54913e-05	1.55965e-05	3.68072e-05	7.11197e-06	4.70509e-06
			DE: Tap water from groundwater ts				-1.73629e-05	-1.866e-05	-4.856e-06	-1.43533e-05	-0.00575318	-4.53129e-06	-4.48093e-06	-4.07194e-06	-9.35788e-06	-4.9872e-07	-1.13259e-05	-4.17332e-06	-6.2261e-05	-0.000852329	-1.16185e-05	-1.16974e-05	-2.76054e-05	-5.33398e-06	-3.52882e-06
			EU-28: Compressed air ts				6.90054e-05	6.86607e-05	1.97035e-05	7.36202e-05	1.88912e-05	6.24862e-07	3.78475e-07	6.03904e-07	1.64289e-06	2.70344e-05	0.000100315	1.27862e-06	2.25043e-05	1.91131e-05	3.97041e-05	4.00948e-05	4.66811e-05	2.72138e-05	1.47097e-05
		DE: B.08 - sputter FS: ZnO (zinc-oxide) -rev4- (001) <Mfg>					0.000493379	0.000490918	9.19368e-05	0.000379884	0.00117717	5.08701e-06	5.22271e-06	4.47012e-06	1.54739e-05	4.99872e-05	0.000957879	1.08689e-05	0.000227033	0.000359033	0.000258963	0.000261858	0.000515211	0.000126907	0.000134201
			DE: Argon (liquid) ts				3.50231e-07	3.48295e-07	6.45205e-08	2.68374e-07	4.2228e-08	2.69558e-09	2.97204e-09	2.45988e-09	8.42093e-09	3.45099e-08	6.85167e-07	5.83742e-09	1.54101e-07	1.38686e-07	1.83179e-07	1.8524e-07	3.65813e-07	8.93469e-08	8.2809e-08
			DE: Electricity grid mix 1kV-60kV ts				0.000465369	0.000462789	8.57252e-05	0.0003566	5.46934e-05	3.57619e-06	3.94376e-06	3.26365e-06	1.11775e-05	4.58576e-05	0.000910463	7.75137e-06	0.000204689	0.000184045	0.000243378	0.000246116	0.00048607	0.000118712	0.000110032
			DE: Nitrogen (liquid) ts				1.88397e-05	1.87358e-05	3.47088e-06	1.44366e-05	2.31002e-06	1.45152e-07	1.60018e-07	1.32457e-07	4.53303e-07	1.8563e-06	3.68555e-05	3.14147e-07	8.29142e-06	7.46665e-06	9.85425e-06	9.96511e-06	1.96781e-05	4.80639e-06	4.45451e-06
			DE: Oxygen (liquid) ts				1.4369e-09	1.42896e-09	2.6471e-10	1.10107e-09	1.73255e-10	1.10592e-11	1.21935e-11	1.00923e-11	3.45489e-11	1.41585e-10	2.81105e-09	2.39494e-11	6.32234e-10	5.68994e-10	7.51535e-10	7.5999e-10	1.50083e-09	3.66566e-10	3.39743e-10
			DE: Tap water from groundwater ts				1.35045e-05	1.45133e-05	3.77689e-06	1.11637e-05	0.00447469	3.52434e-06	3.48517e-06	3.16706e-06	7.27835e-06	3.87893e-07	8.80907e-06	3.24592e-06	4.84252e-05	0.000662923	9.03662e-06	9.09795e-06	2.14708e-05	4.14865e-06	2.74464e-06
			DE: Tap water from groundwater ts				-1.01284e-05	-1.0885e-05	-2.83267e-06	-8.37278e-06	-0.00335602	-2.64325e-06	-2.61388e-06	-2.3753e-06	-5.45877e-06	-2.9092e-07	-6.6068e-06	-2.43444e-06	-3.63189e-05	-0.000497192	-6.77747e-06	-6.82347e-06	-1.61031e-05	-3.11149e-06	-2.05848e-06
			EU-28: Compressed air ts				5.17541e-06	5.14956e-06	1.47776e-06	5.52152e-06	1.41684e-06	4.68647e-08	2.83857e-08	4.52928e-08	1.23217e-07	2.02758e-06	7.52359e-06	9.58967e-08	1.68782e-06	1.43348e-06	2.97781e-06	3.00711e-06	3.50108e-06	2.04104e-06	1.10323e-06
			GLO: market for zinc oxide ecoinvent 3.5				2.6755e-07	2.65713e-07	2.54002e-07	2.65364e-07	3.61715e-08	4.35013e-07	2.16275e-07	2.34484e-07	1.89182e-06	1.14079e-07	1.46791e-07	1.89017e-06	1.035e-07	2.18167e-07	3.10621e-07	3.09921e-07	2.26754e-07	2.20359e-07	1.78421e-05
		DE: B.09 - sputter FS_#2: ITO (indium-tin-oxide) -rev4- (001) <LC>					0.00355054	0.00353326	0.000767473	0.00274133	0.00842721	0.000283323	0.00018255	0.000131299	0.000790327	0.000391022	0.00680283	0.000481247	0.00166443	0.0035289	0.0019565	0.00197451	0.00372487	0.00102877	0.00343302
			DE: Argon (liquid) ts				2.45161e-06	2.43807e-06	4.51643e-07	1.87862e-06	2.95596e-07	1.8869e-08	2.08043e-08	1.72192e-08	5.89465e-08	2.4157e-07	4.79617e-06	4.08619e-08	1.07871e-06	9.70805e-07	1.28226e-06	1.29668e-06	2.56069e-06	6.25429e-07	5.79663e-07
			DE: Electricity grid mix 1kV-60kV ts				0.00325758	0.00323952	0.000600076	0.0024962	0.000382854	2.50333e-05	2.76063e-05	2.28456e-05	7.82424e-05	0.000321003	0.00637324	5.42596e-05	0.00143282	0.00128831	0.00170364	0.00172281	0.00340249	0.000830986	0.000770224
			DE: Nitrogen (liquid) ts				0.00016579	0.000164875	3.05438e-05	0.000127042	2.03282e-05	1.27734e-06	1.40816e-06	1.16562e-06	3.98907e-06	1.63355e-05	0.000324328	2.76449e-06	7.29645e-05	6.57066e-05	8.67174e-05	8.7693e-05	0.000173167	4.22962e-05	3.91997e-05
			DE: Oxygen (liquid) ts				2.15535e-08	2.14344e-08	3.97065e-09	1.6516e-08	2.59883e-09	1.65889e-10	1.82902e-10	1.51384e-10	5.18233e-10	2.12377e-09	4.21658e-08	3.59241e-10	9.48351e-09	8.53491e-09	1.1273e-08	1.13999e-08	2.25125e-08	5.4985e-09	5.09614e-09
			DE: Tap water from groundwater ts				9.64605e-05	0.000103667	2.69778e-05	7.97408e-05	0.0319621	2.51738e-05	2.48941e-05	2.26219e-05	5.19882e-05	2.77067e-06	6.29219e-05	2.31851e-05	0.000345894	0.00473516	6.45473e-05	6.49854e-05	0.000153363	2.96332e-05	1.96045e-05
			DE: Tap water from groundwater ts				-7.23454e-05	-7.77499e-05	-2.02333e-05	-5.98056e-05	-0.0239716	-1.88804e-05	-1.86706e-05	-1.69664e-05	-3.89912e-05	-2.078e-06	-4.71914e-05	-1.73888e-05	-0.000259421	-0.00355137	-4.84105e-05	-4.8739e-05	-0.000115022	-2.22249e-05	-1.47034e-05
			EU-28: Compressed air ts				3.45027e-05	3.43304e-05	9.85176e-06	3.68101e-05	9.44559e-06	3.12431e-07	1.89238e-07	3.01952e-07	8.21446e-07	1.35172e-05	5.01573e-05	6.39312e-07	1.12521e-05	9.55655e-06	1.98521e-05	2.00474e-05	2.33406e-05	1.36069e-05	7.35487e-06
			RER: market for indium tin oxide powder, nanoscale, for sputtering target ecoinvent 3.5				6.60763e-05	6.616e-05	0.000119801	5.945e-05	2.37531e-05	0.000250387	0.000147102	0.000101314	0.000694218	3.92297e-05	3.45403e-05	0.000417746	5.98319e-05	0.000980557	0.00012886	0.000126407	8.49431e-05	0.000133844	0.00261075
		DE: B.10 - contact formation/ metallization (Ag-fingers) -rev4- (001) <Mfg>					0.00865944	0.00857398	0.0124643	0.00738285	0.00147352	0.0672045	0.0398731	0.0327032	0.153771	0.00299487	0.0164023	0.19365	0.00789978	0.188492	0.0207804	0.0207858	0.0159831	0.0106062	0.0523989
			DE: manufacturing of printing screens (application of ag-fingers) <Mfg>				0.00173029	0.00173528	0.00387194	0.0014698	0.000339422	0.00884597	0.00141314	0.013603	0.00292085	0.000509519	0.00133232	0.00963561	0.000725968	0.03596	0.00244669	0.00241527	0.00110742	0.00200793	0.0416908
				DE: Aluminium frame profile, powder coated (EN15804 A1-A3) ts			6.93658e-05	6.94406e-05	3.31151e-05	5.76913e-05	1.57644e-05	1.49025e-06	5.10915e-07	1.19723e-06	3.08573e-06	1.04492e-05	3.44872e-05	2.47861e-06	1.94142e-05	7.45689e-05	5.18984e-05	5.23794e-05	3.15485e-05	4.47138e-05	1.24898e-05
				RER: market for adhesive, for metal ecoinvent 3.5			4.80691e-05	4.79028e-05	4.24473e-05	5.89554e-05	1.69385e-05	0.000143496	3.58265e-05	3.89332e-05	6.14907e-05	1.88038e-05	2.14707e-05	4.83635e-05	1.84553e-05	2.85491e-05	5.22965e-05	4.9134e-05	3.0148e-05	3.85768e-05	0.000101672
				RER: steel production, chromium steel 18/8, hot rolled ecoinvent 3.5			0.00161285	0.00161794	0.00379638	0.00135315	0.000306719	0.00870098	0.00137681	0.0135629	0.00285627	0.000480266	0.00127636	0.00958476	0.000688098	0.0358569	0.00234249	0.00231376	0.00104572	0.00192464	0.0415766
			RER: preparation of Ag-paste (95% Ag, 5% unknown solvent) <Mfg>				0.00381252	0.00373912	0.00800279	0.0034257	0.000716357	0.0578365	0.0384877	0.0190998	0.151014	0.00208362	0.00913288	0.183598	0.00586388	0.15142	0.0166833	0.0167019	0.0117435	0.00778142	0.0103401
				EU-28: Electricity grid mix 1kV-60kV ts			1.15745e-06	1.15166e-06	3.29331e-07	1.23236e-06	3.14996e-07	1.04728e-08	6.38472e-09	1.01159e-08	2.75469e-08	4.51209e-07	1.69033e-06	2.1425e-08	3.79042e-07	3.21715e-07	6.65044e-07	6.71591e-07	7.85457e-07	4.54869e-07	2.46818e-07
				GLO: market for chemical, organic ecoinvent 3.5			5.78807e-07	5.77725e-07	4.86827e-07	1.12112e-06	3.60025e-07	3.78018e-07	2.70735e-07	3.44671e-07	4.07898e-07	1.00853e-07	1.23845e-07	3.52791e-07	1.63499e-07	1.73793e-07	7.27457e-07	6.54612e-07	2.56568e-07	4.80512e-07	7.02298e-07
				GLO: market for silver ecoinvent 3.5			0.00380377	0.00373037	0.00797242	0.00341666	0.000713011	0.0578286	0.0384814	0.0190872	0.151006	0.00207826	0.00912206	0.183591	0.00586023	0.151043	0.0166589	0.0166776	0.0117267	0.0077469	0.0103304
				GLO: market for solder factory ecoinvent 3.5			5.76882e-10	4.95162e-10	7.3032e-10	3.95918e-10	1.45649e-10	1.24296e-09	3.43811e-10	1.2177e-09	8.64697e-10	9.61043e-11	7.1673e-09	1.17513e-09	7.00963e-10	1.88915e-09	9.55272e-10	9.37284e-10	3.61867e-10	9.96099e-10	2.4659e-09
				GLO: market for tin ecoinvent 3.5			6.21001e-06	6.21578e-06	2.92035e-05	5.86329e-06	2.63297e-06	7.2901e-06	5.91612e-06	1.20022e-05	7.11653e-06	4.72243e-06	8.58174e-06	6.1771e-06	3.04749e-06	0.000375868	2.19398e-05	2.19551e-05	1.51777e-05	3.32061e-05	4.14736e-06
				RER: market for transport, freight, inland waterways, barge ecoinvent 3.5			1.17939e-08	1.18427e-08	1.5188e-08	1.00583e-08	1.50517e-09	4.50759e-09	3.26482e-09	8.61674e-09	4.20145e-09	3.4793e-09	1.38923e-08	4.68975e-09	2.24195e-09	8.85453e-09	6.79242e-08	6.83928e-08	2.54438e-08	1.82607e-08	1.19039e-08
				RER: market for transport, freight, lorry, unspecified ecoinvent 3.5			2.66712e-07	2.66712e-07	2.42671e-07	2.57011e-07	2.42686e-08	1.96573e-07	4.63793e-08	1.27898e-07	2.19037e-07	3.3101e-08	3.61446e-07	5.05477e-07	3.75954e-08	1.13028e-07	7.25673e-07	7.2313e-07	2.5023e-07	2.42487e-07	4.5364e-06
				RER: market group for heat, district or industrial, natural gas ecoinvent 3.5			5.03091e-07	5.03172e-07	5.99482e-08	5.31786e-07	5.99349e-09	3.95707e-08	1.50382e-08	3.92807e-08	2.1342e-08	1.52661e-08	8.08971e-09	1.01667e-07	8.37781e-09	3.01115e-08	1.79307e-07	1.7557e-07	2.71602e-07	7.68164e-08	2.88363e-08
				RER: market group for transport, freight train ecoinvent 3.5			2.44114e-08	2.44757e-08	3.28863e-08	2.47968e-08	6.17383e-09	2.63089e-08	2.25997e-08	5.05632e-08	2.66813e-08	2.46895e-08	3.32762e-08	2.50773e-08	1.13184e-08	3.19187e-08	9.48907e-08	9.5113e-08	2.45202e-08	3.57038e-08	5.15201e-08
			DE: Electricity grid mix 1kV-60kV ts				0.00279221	0.00277673	0.000514351	0.0021396	0.000328161	2.14572e-05	2.36625e-05	1.95819e-05	6.70649e-05	0.000275146	0.00546278	4.65082e-05	0.00122813	0.00110427	0.00146027	0.00147669	0.00291642	0.000712274	0.000660192
			EU-28: Compressed air ts				0.0003226	0.000320989	9.2114e-05	0.000344174	8.83163e-05	2.92123e-06	1.76937e-06	2.82325e-06	7.68052e-06	0.000126386	0.000468971	5.97756e-06	0.000105208	8.93538e-05	0.000185617	0.000187443	0.000218234	0.000127225	6.8768e-05
			Europe without Switzerland: market for scrap steel ecoinvent 3.5				2.81063e-06	2.81298e-06	3.93674e-06	4.3233e-06	1.81707e-06	0.000576745	7.79e-07	5.73793e-06	5.75673e-06	6.1367e-07	7.82385e-06	0.000444568	5.16069e-07	1.39676e-06	1.07384e-05	1.0696e-05	3.72756e-06	3.85546e-06	1.89752e-05
			GLO: market for anode slime, silver and tellurium containing stockpiling ecoinvent 3.5				-1.2753e-06	-1.24624e-06	-2.12098e-05	-1.03703e-06	-6.40423e-07	-8.05785e-05	-5.41462e-05	-2.8015e-05	-0.000245521	-5.14572e-07	-3.08838e-06	-8.18779e-05	-2.40345e-05	-8.28509e-05	-6.77776e-06	-6.76254e-06	-6.5294e-06	-2.68072e-05	-0.000380557
			GLO: market for waste aluminium ecoinvent 3.5				2.85675e-07	2.87692e-07	3.79338e-07	2.93489e-07	9.17613e-08	1.52638e-06	1.95266e-07	2.56182e-07	1.64423e-06	1.02403e-07	6.05155e-07	1.22853e-06	1.0467e-07	1.01837e-07	6.08567e-07	6.07707e-07	2.42701e-07	3.42341e-07	5.92876e-07
		DE: B.11 - curing (module) -rev4- (001) <Mfg>					0.00108966	0.00108383	0.000240405	0.000952695	0.000189248	8.91038e-06	8.06348e-06	8.32263e-06	2.60896e-05	0.000222207	0.00193498	1.88832e-05	0.000434745	0.000384534	0.000590387	0.000596712	0.000994021	0.000332507	0.000248526
			DE: Electricity grid mix 1kV-60kV ts				0.000698053	0.000694183	0.000128588	0.0005349	8.20401e-05	5.36429e-06	5.91564e-06	4.89548e-06	1.67662e-05	6.87864e-05	0.00136569	1.16271e-05	0.000307034	0.000276067	0.000365066	0.000369174	0.000729105	0.000178068	0.000165048
			EU-28: Compressed air ts				0.000391606	0.00038965	0.000111817	0.000417795	0.000107207	3.54609e-06	2.14785e-06	3.42716e-06	9.32341e-06	0.00015342	0.000569285	7.25619e-06	0.000127712	0.000108467	0.000225321	0.000227538	0.000264915	0.000154438	8.34778e-05
		DE: B.12 - test -rev4- (001) <Mfg>					0.000808195	0.000803718	0.000149428	0.000620932	9.58338e-05	6.21814e-06	6.83279e-06	5.67736e-06	1.94105e-05	8.12333e-05	0.00157845	1.34718e-05	0.000354861	0.000318982	0.000422953	0.000427707	0.000842147	0.000206922	0.000190964
			DE: Electricity grid mix 1kV-60kV ts				0.000802761	0.000798311	0.000147876	0.000615135	9.43462e-05	6.16893e-06	6.80298e-06	5.6298e-06	1.92812e-05	7.91043e-05	0.00157055	1.33711e-05	0.000353089	0.000317477	0.000419826	0.00042455	0.000838471	0.000204779	0.000189805
			EU-28: Compressed air ts				5.43418e-06	5.40703e-06	1.55165e-06	5.79759e-06	1.48768e-06	4.92079e-08	2.98049e-08	4.75575e-08	1.29378e-07	2.12896e-06	7.89977e-06	1.00692e-07	1.77221e-06	1.50516e-06	3.1267e-06	3.15747e-06	3.67614e-06	2.14309e-06	1.15839e-06
		DE: external waste water treatment [drain acid - X.02] -rev4- (001) <LC>					4.89646e-06	4.91709e-06	4.26402e-06	4.39368e-06	-1.08897e-05	3.88939e-06	1.2567e-05	2.82651e-06	4.1915e-06	1.29582e-06	5.9222e-06	8.68115e-06	0.000235957	2.64418e-06	1.2068e-05	1.20277e-05	8.5933e-06	4.36086e-06	7.29005e-05
			CH: treatment of wastewater from PV cell production, capacity 5E9l/year ecoinvent 3.5				6.75454e-07	6.96287e-07	4.01866e-07	3.34843e-07	-1.12684e-05	7.92796e-07	1.18401e-05	8.12996e-07	7.36482e-07	8.09964e-07	2.40533e-07	7.15474e-07	0.000235367	8.66368e-07	6.06002e-07	6.05527e-07	4.64267e-06	5.17581e-07	1.40041e-06
			GLO: market group for transport, freight, lorry, unspecified ecoinvent 3.5				4.22101e-06	4.2208e-06	3.86216e-06	4.05883e-06	3.78647e-07	3.0966e-06	7.26807e-07	2.01352e-06	3.45502e-06	4.85859e-07	5.68167e-06	7.96567e-06	5.90344e-07	1.77781e-06	1.1462e-05	1.14222e-05	3.95064e-06	3.84328e-06	7.15001e-05
		DE: X.01 - exhaust abatement [defaul] -rev5- (001) <Mfg>					0.00148113	0.00147945	0.000509365	0.000953874	0.00109954	9.10023e-05	7.06573e-05	6.90265e-05	0.000113356	0.000129631	0.000652107	8.79997e-05	0.000180509	0.00034104	0.00259779	0.00263669	0.000393953	0.00066937	0.000253748
			DE: preparation of potassium hydroxide (50% in H2O) <Mfg>				6.39175e-05	6.37611e-05	8.14718e-05	6.02417e-05	1.74154e-05	8.51965e-05	6.72205e-05	6.41541e-05	0.000101328	3.32422e-05	4.57263e-05	7.73813e-05	3.29945e-05	4.51904e-05	7.65065e-05	7.67453e-05	5.87507e-05	6.74501e-05	0.000145923
				GLO: market for potassium hydroxide ecoinvent 3.5			6.33758e-05	6.32198e-05	8.08701e-05	5.97429e-05	1.69844e-05	8.47591e-05	6.6294e-05	6.3612e-05	0.000100878	3.31351e-05	4.50533e-05	7.657e-05	3.21408e-05	4.48001e-05	7.46869e-05	7.49259e-05	5.82216e-05	6.68584e-05	0.00013991
				GLO: market for water, ultrapure ecoinvent 3.5			5.41719e-07	5.41273e-07	6.0174e-07	4.98797e-07	4.30975e-07	4.37456e-07	9.26497e-07	5.42165e-07	4.50483e-07	1.07022e-07	6.73044e-07	8.11292e-07	8.53697e-07	3.9028e-07	1.81963e-06	1.81944e-06	5.29099e-07	5.91712e-07	6.01257e-06
			DE: X.03 - ultrapure water system -rev4- (001) <Mfg>				4.00589e-05	4.00839e-05	7.95753e-06	3.08965e-05	0.00101115	1.82776e-06	1.2675e-06	2.13888e-06	3.00572e-06	3.82311e-06	7.38368e-05	2.11726e-06	2.72351e-05	0.00016578	2.15176e-05	2.174e-05	5.57623e-05	1.05722e-05	1.19283e-05
				CH: ion-exchanger production for water treatment ecoinvent 3.5			3.9704e-07	3.98161e-07	3.61338e-07	3.21008e-07	1.16201e-07	7.53406e-07	1.73021e-07	1.16951e-06	4.88575e-07	1.26747e-07	2.03707e-07	7.76966e-07	2.31737e-07	2.15047e-06	3.31167e-07	3.24241e-07	1.26793e-05	2.96302e-07	2.65151e-06
				DE: Electricity grid mix 1kV-60kV ts			3.66229e-05	3.64199e-05	6.74627e-06	2.80632e-05	4.30418e-06	2.81434e-07	3.1036e-07	2.56838e-07	8.79629e-07	3.60883e-06	7.16502e-05	6.10006e-07	1.61083e-05	1.44837e-05	1.9153e-05	1.93684e-05	3.8252e-05	9.34224e-06	8.65913e-06
				DE: Tap water from groundwater ts			3.03826e-06	3.26524e-06	8.49732e-07	2.51163e-06	0.00100673	7.92913e-07	7.841e-07	7.12532e-07	1.6375e-06	8.7269e-08	1.98188e-06	7.30273e-07	1.08948e-05	0.000149146	2.03308e-06	2.04688e-06	4.83055e-06	9.33372e-07	6.17494e-07
				DE: X.03 - ultra pure water system -rev4- (001) ecoinvent 3.5 <u-so>			1.56751e-14	1.56751e-14	0	0	-2.92265e-15	0	1.15408e-11	0	0	0	0	0	1.15724e-11	0	0	0	0	0	0
				EU-28: Compressed air ts			6.7881e-10	6.7542e-10	1.93825e-10	7.24206e-10	1.85834e-10	6.14681e-12	3.72309e-12	5.94064e-12	1.61612e-11	2.65939e-10	9.86801e-10	1.25779e-11	2.21376e-10	1.88017e-10	3.90572e-10	3.94415e-10	4.59205e-10	2.67704e-10	1.44701e-10
			DE: Electricity grid mix 1kV-60kV ts				0.000116186	0.000115542	2.14025e-05	8.90304e-05	1.3655e-05	8.92848e-07	9.84617e-07	8.14818e-07	2.79062e-06	1.1449e-05	0.00022731	1.93524e-06	5.11036e-05	4.59494e-05	6.07627e-05	6.14464e-05	0.000121354	2.96383e-05	2.74711e-05
			DE: emission, direct [default] -rev4- [X.01] <u-so>				0.000969907	0.000969907	0.000317068	0	0	0	0	0	0	0	0	0	0	0	0.0022688	0.00230595	0	0.000449222	0
			DE: Natural gas mix ts				8.43175e-05	8.44484e-05	2.24337e-05	0.000553141	7.23631e-07	1.21304e-06	5.06988e-08	1.09332e-07	1.30923e-06	1.22176e-07	4.69326e-06	2.73521e-06	1.75387e-06	2.68582e-05	5.12518e-05	5.06864e-05	1.82302e-05	3.09559e-05	2.43561e-05
			EU-28: Compressed air ts				0.000206738	0.000205706	5.90313e-05	0.000220564	5.65975e-05	1.87207e-06	1.1339e-06	1.80928e-06	4.92206e-06	8.09945e-05	0.00030054	3.83072e-06	6.74223e-05	5.72624e-05	0.000118953	0.000120123	0.000139855	8.15319e-05	4.407e-05
		DE: X.02 - tray cleaning -rev5- (001) <Mfg>					0.00082505	0.000820884	0.000357053	0.000735105	0.000112773	1.06412e-05	7.28826e-06	7.18204e-06	3.28537e-05	7.22674e-05	0.00141174	2.30074e-05	0.000330294	0.00172105	0.000522862	0.000527703	0.000798981	0.000501642	0.000223432
			DE: preparation of phosphoric acid (85% H3PO4) <Mfg>				0.000126936	0.000126634	0.000228448	0.000200154	1.02768e-05	5.26083e-06	1.35669e-06	2.27208e-06	1.60542e-05	3.47922e-06	4.60069e-05	1.13655e-05	2.3039e-05	0.00144195	0.000157754	0.000158488	6.97776e-05	0.000323554	5.83719e-05
				DE: Phosphoric acid (100%) (wet process) ts			0.000126655	0.000126354	0.000228136	0.000199895	1.00536e-05	5.03426e-06	8.76823e-07	1.99128e-06	1.58209e-05	3.42379e-06	4.56583e-05	1.09453e-05	2.25968e-05	0.00144175	0.000156812	0.000157546	6.95035e-05	0.000323248	5.52577e-05
				GLO: market for water, ultrapure ecoinvent 3.5			2.80576e-07	2.80345e-07	3.11663e-07	2.58345e-07	2.23218e-07	2.26574e-07	4.79866e-07	2.80807e-07	2.33322e-07	5.54306e-08	3.48594e-07	4.20197e-07	4.42161e-07	2.0214e-07	9.42453e-07	9.42356e-07	2.74039e-07	3.06469e-07	3.11413e-06
			DE: Electricity grid mix 1kV-60kV ts				0.000698053	0.000694183	0.000128588	0.0005349	8.20401e-05	5.36429e-06	5.91564e-06	4.89548e-06	1.67662e-05	6.87864e-05	0.00136569	1.16271e-05	0.000307034	0.000276067	0.000365066	0.000369174	0.000729105	0.000178068	0.000165048
			DE: Tap water from groundwater ts				6.17347e-08	6.63466e-08	1.72658e-08	5.10341e-08	2.04557e-05	1.61113e-08	1.59322e-08	1.4478e-08	3.32725e-08	1.77323e-09	4.027e-08	1.48385e-08	2.21372e-07	3.0305e-06	4.13103e-08	4.15906e-08	9.81524e-08	1.89653e-08	1.25469e-08
		DE: X.04 - inhouse waste water treatment -rev4- (001) <LC>					0.00195846	0.00194705	0.000913715	0.00149768	-0.00402221	0.000838013	0.000552335	0.00178866	0.00132191	0.000482124	0.00310229	0.000925071	0.000917374	0.00147248	0.00150431	0.00151617	0.00201018	0.00120221	0.00779309
			DE: [BLOCK] X.04 - inhouse waste water treatment -rev4- (001) <LC>				8.34518e-06	8.29634e-06	3.91041e-06	6.35369e-06	-1.81068e-05	3.6656e-06	2.41593e-06	7.82856e-06	5.77801e-06	2.08938e-06	1.3157e-05	4.04388e-06	3.91433e-06	6.28975e-06	6.46571e-06	6.51656e-06	8.56292e-06	5.1339e-06	3.40629e-05
				DE: preparation of hydrogen chloride (36% in H2O) <Mfg>			1.57373e-07	1.57386e-07	5.66978e-08	1.91767e-07	3.09954e-08	2.58239e-08	4.96229e-08	3.01255e-08	3.52102e-08	9.88139e-09	1.20932e-07	4.94002e-08	8.4821e-08	1.12571e-07	1.78653e-07	1.77503e-07	1.55133e-07	6.42171e-08	4.41158e-07
					DE: Hydrochloric acid mix (100%) ts		1.29005e-07	1.29041e-07	2.51861e-08	1.65646e-07	8.42626e-09	2.91539e-09	1.10453e-09	1.73367e-09	1.16195e-08	4.27691e-09	8.5686e-08	6.91485e-09	4.0115e-08	9.21331e-08	8.33639e-08	8.22227e-08	1.27426e-07	3.32306e-08	1.26295e-07
					GLO: market for water, ultrapure ecoinvent 3.5		2.83685e-08	2.83451e-08	3.15116e-08	2.61208e-08	2.25691e-08	2.29085e-08	4.85184e-08	2.83919e-08	2.35907e-08	5.60448e-09	3.52457e-08	4.24854e-08	4.4706e-08	2.0438e-08	9.52896e-08	9.52798e-08	2.77076e-08	3.09865e-08	3.14864e-07
				DE: Electricity grid mix 1kV-60kV ts			4.78017e-06	4.75367e-06	8.80551e-07	3.66292e-06	5.618e-07	3.67339e-08	4.05095e-08	3.35235e-08	1.14813e-07	4.7104e-07	9.35208e-06	7.96205e-08	2.10252e-06	1.89047e-06	2.49992e-06	2.52805e-06	4.99281e-06	1.21939e-06	1.13023e-06
				DE: Sludge (acid/basic) ts			1.00949e-06	1.00917e-06	1.39738e-07	1.21794e-07	9.88226e-09	3.61853e-09	3.42733e-10	3.32709e-08	5.65068e-07	3.06495e-09	6.47621e-08	4.68914e-07	3.08547e-08	7.73083e-07	7.96807e-07	8.08462e-07	9.5871e-07	1.93623e-07	2.43689e-05
				DE: Sodium hydroxide mix (50%) ts			9.30515e-07	9.27501e-07	2.57009e-07	7.61481e-07	1.23467e-07	9.00927e-09	8.18676e-09	7.57568e-09	2.72394e-08	6.78287e-08	1.37287e-06	1.662e-08	4.26679e-07	5.92787e-07	8.18369e-07	8.24731e-07	8.00913e-07	3.29546e-07	1.80813e-07
				DE: Tap water from groundwater ts			-6.09512e-08	-6.55046e-08	-1.70466e-08	-5.03864e-08	-2.01961e-05	-1.59068e-08	-1.573e-08	-1.42943e-08	-3.28502e-08	-1.75072e-09	-3.97589e-08	-1.46502e-08	-2.18563e-07	-2.99204e-06	-4.0786e-08	-4.10628e-08	-9.69067e-08	-1.87246e-08	-1.23877e-08
				EU-28: Compressed air ts			1.70324e-07	1.69473e-07	4.86336e-08	1.81715e-07	4.66286e-08	1.54233e-09	9.3418e-10	1.4906e-09	4.0551e-09	6.67283e-08	2.47604e-07	3.15599e-09	5.55467e-08	4.71763e-08	9.80005e-08	9.89649e-08	1.15222e-07	6.71711e-08	3.63076e-08
				GLO: market for iron(III) chloride, without water, in 14% iron solution state ecoinvent 3.5			4.48307e-07	4.43299e-07	6.84898e-07	4.7385e-07	2.70356e-07	1.28458e-06	8.51152e-07	8.74707e-07	1.81681e-06	5.84113e-07	5.20616e-07	1.19429e-06	4.59262e-07	9.46522e-07	6.85196e-07	6.87185e-07	8.07787e-07	6.65086e-07	2.88048e-06
				RER: market for aluminium sulfate, powder ecoinvent 3.5			5.45079e-07	5.4454e-07	1.23157e-06	7.02929e-07	4.95004e-07	1.5357e-06	9.32277e-07	6.29847e-06	1.96754e-06	7.27316e-07	4.96629e-07	1.48703e-06	3.97906e-07	4.24149e-06	9.21656e-07	9.24135e-07	5.30148e-07	1.60671e-06	2.86287e-06
				RER: market for calcium chloride ecoinvent 3.5			3.6487e-07	3.568e-07	6.28359e-07	3.07617e-07	5.51207e-07	7.84502e-07	5.48638e-07	5.6369e-07	1.28013e-06	1.61156e-07	1.02126e-06	7.59496e-07	5.75304e-07	6.77694e-07	5.07894e-07	5.08588e-07	2.99107e-07	1.00688e-06	2.17446e-06
			DE: preparation of hydrogen chloride (36% in H2O) <Mfg>				3.57867e-05	3.57896e-05	1.28931e-05	4.36078e-05	7.04834e-06	5.87235e-06	1.12842e-05	6.85054e-06	8.0068e-06	2.24703e-06	2.74999e-05	1.12336e-05	1.92883e-05	2.55987e-05	4.06258e-05	4.03641e-05	3.52773e-05	1.4603e-05	0.000100319
				DE: Hydrochloric acid mix (100%) ts			2.93357e-05	2.93439e-05	5.72733e-06	3.76679e-05	1.91613e-06	6.62958e-07	2.51171e-07	3.94236e-07	2.64227e-06	9.7257e-07	1.9485e-05	1.57244e-06	9.12214e-06	2.09511e-05	1.89569e-05	1.86974e-05	2.89766e-05	7.55663e-06	2.87194e-05
				GLO: market for water, ultrapure ecoinvent 3.5			6.45099e-06	6.44568e-06	7.16575e-06	5.93986e-06	5.13221e-06	5.20939e-06	1.10331e-05	6.4563e-06	5.36452e-06	1.27446e-06	8.01486e-06	9.66117e-06	1.01661e-05	4.64761e-06	2.16688e-05	2.16666e-05	6.30071e-06	7.04633e-06	7.16e-05
			DE: X.07 - acidic exhaust air washer -rev5- (001) <Mfg>				8.58667e-13	8.55001e-13	1.73357e-13	6.66178e-13	3.194e-12	1.15575e-14	1.0174e-14	1.18922e-14	2.76658e-14	8.04938e-14	1.59589e-12	1.8931e-14	4.09933e-13	8.35266e-13	5.02764e-13	5.07914e-13	9.12836e-13	2.34562e-13	2.04429e-13
				DE: X.03 - ultrapure water system -rev4- (001) <Mfg>			1.23025e-13	1.23102e-13	2.44384e-14	9.48863e-14	3.10533e-12	5.61323e-15	3.8926e-15	6.56871e-15	9.23086e-15	1.17412e-14	2.2676e-13	6.5023e-15	8.36416e-14	5.09127e-13	6.60826e-14	6.67655e-14	1.71251e-13	3.24682e-14	3.66329e-14
					CH: ion-exchanger production for water treatment ecoinvent 3.5		1.21935e-15	1.22279e-15	1.10971e-15	9.85848e-16	3.56865e-16	2.31378e-15	5.31363e-16	3.59167e-15	1.50046e-15	3.89251e-16	6.25605e-16	2.38614e-15	7.11688e-16	6.60429e-15	1.01705e-15	9.95774e-16	3.89393e-14	9.09974e-16	8.14304e-15
					DE: Electricity grid mix 1kV-60kV ts		1.12472e-13	1.11849e-13	2.07185e-14	8.61847e-14	1.32186e-14	8.6431e-16	9.53145e-16	7.88774e-16	2.70143e-15	1.10831e-14	2.20045e-13	1.87339e-15	4.94702e-14	4.44807e-14	5.88206e-14	5.94824e-14	1.17476e-13	2.86909e-14	2.6593e-14
					DE: Tap water from groundwater ts		9.3308e-15	1.00279e-14	2.60961e-15	7.71347e-15	3.09175e-12	2.43511e-15	2.40805e-15	2.18826e-15	5.02892e-15	2.68012e-16	6.08655e-15	2.24274e-15	3.3459e-14	4.58041e-13	6.24378e-15	6.28616e-15	1.48351e-14	2.86648e-15	1.89638e-15
					DE: X.03 - ultra pure water system -rev4- (001) ecoinvent 3.5 <u-so>		4.81399e-23	4.81399e-23	0	0	-8.97574e-24	0	3.5443e-20	0	0	0	0	0	3.55401e-20	0	0	0	0	0	0
					EU-28: Compressed air ts		2.08469e-18	2.07428e-18	5.95255e-19	2.22411e-18	5.70714e-19	1.88774e-20	1.1434e-20	1.82443e-20	4.96327e-20	8.16726e-19	3.03056e-18	3.86279e-20	6.79868e-19	5.77418e-19	1.19948e-18	1.21129e-18	1.41026e-18	8.22145e-19	4.4439e-19
				DE: Electricity grid mix 1kV-60kV ts			5.89902e-13	5.86632e-13	1.08665e-13	4.52027e-13	6.93295e-14	4.53319e-15	4.99911e-15	4.13701e-15	1.41686e-14	5.81291e-14	1.1541e-12	9.82565e-15	2.59464e-13	2.33295e-13	3.08506e-13	3.11977e-13	6.16143e-13	1.5048e-13	1.39477e-13
				DE: Sodium hydroxide mix (50%) ts			1.4574e-13	1.45268e-13	4.02534e-14	1.19265e-13	1.93378e-14	1.41106e-15	1.28223e-15	1.18652e-15	4.2663e-15	1.06235e-14	2.15023e-13	2.60307e-15	6.68277e-14	9.28439e-14	1.28175e-13	1.29172e-13	1.25441e-13	5.16143e-14	2.83194e-14
			DE: X.08 - caustic exhaust air washer -rev4- (001) <Mfg>				4.27101e-05	4.25174e-05	1.87883e-05	3.90568e-05	0.000112239	7.16925e-07	4.53796e-07	5.48058e-07	1.98089e-06	3.95372e-06	7.82352e-05	1.28814e-06	1.90708e-05	3.20588e-05	2.24681e-05	2.26544e-05	4.42658e-05	2.71571e-05	1.08395e-05
				DE: X.03 - ultrapure water system -rev4- (001) <Mfg>			4.27184e-06	4.27451e-06	8.48584e-07	3.29478e-06	0.000107828	1.94911e-07	1.35165e-07	2.28088e-07	3.20527e-07	4.07693e-07	7.87389e-06	2.25782e-07	2.90432e-06	1.76786e-05	2.29462e-06	2.31833e-06	5.94644e-06	1.12741e-06	1.27202e-06
					CH: ion-exchanger production for water treatment ecoinvent 3.5		4.234e-08	4.24595e-08	3.85328e-08	3.4232e-08	1.23916e-08	8.03426e-08	1.84508e-08	1.24715e-07	5.21012e-08	1.35162e-08	2.17231e-08	8.2855e-08	2.47123e-08	2.29324e-07	3.53154e-08	3.45767e-08	1.35211e-06	3.15974e-08	2.82754e-07
					DE: Electricity grid mix 1kV-60kV ts		3.90543e-06	3.88378e-06	7.19416e-07	2.99263e-06	4.58994e-07	3.00118e-08	3.30965e-08	2.7389e-08	9.38029e-08	3.84843e-07	7.64071e-06	6.50505e-08	1.71778e-06	1.54452e-06	2.04245e-06	2.06543e-06	4.07916e-06	9.96248e-07	9.23402e-07
					DE: Tap water from groundwater ts		3.23998e-07	3.48202e-07	9.06146e-08	2.67838e-07	0.000107356	8.45555e-08	8.36158e-08	7.59838e-08	1.74621e-07	9.30629e-09	2.11346e-07	7.78756e-08	1.16181e-06	1.59048e-05	2.16806e-07	2.18277e-07	5.15126e-07	9.95339e-08	6.5849e-08
					DE: X.03 - ultra pure water system -rev4- (001) ecoinvent 3.5 <u-so>		1.67158e-15	1.67158e-15	0	0	-3.11669e-16	0	1.2307e-12	0	0	0	0	0	1.23408e-12	0	0	0	0	0	0
					EU-28: Compressed air ts		7.23877e-11	7.20262e-11	2.06693e-11	7.72287e-11	1.98171e-11	6.5549e-13	3.97027e-13	6.33505e-13	1.72342e-12	2.83595e-11	1.05232e-10	1.3413e-12	2.36073e-11	2.00499e-11	4.16502e-11	4.20601e-11	4.89692e-11	2.85477e-11	1.54307e-11
				DE: Electricity grid mix 1kV-60kV ts			3.49835e-05	3.47895e-05	6.44428e-06	2.68069e-05	4.11151e-06	2.68835e-07	2.96467e-07	2.45341e-07	8.40253e-07	3.44728e-06	6.84428e-05	5.82699e-07	1.53872e-05	1.38353e-05	1.82956e-05	1.85014e-05	3.65397e-05	8.92404e-06	8.27151e-06
				DE: Sulphuric acid (96%) ts			3.45478e-06	3.45334e-06	1.14955e-05	8.95514e-06	2.99667e-07	2.53179e-07	2.21649e-08	7.46285e-08	8.20107e-07	9.87406e-08	1.91845e-06	4.79663e-07	7.79298e-07	5.44853e-07	1.87789e-06	1.8346e-06	1.77969e-06	1.71057e-05	1.29594e-06
			DE: X.09.oe3 - Process exhaust ventilators -rev4- (001) <LC>				6.06739e-06	6.03375e-06	1.11767e-06	4.64928e-06	7.13083e-07	4.66257e-08	5.1418e-08	4.25509e-08	1.4573e-07	5.97883e-07	1.18704e-05	1.01061e-07	2.6687e-06	2.39954e-06	3.17311e-06	3.20881e-06	6.33729e-06	1.54775e-06	1.43458e-06
				DE: Electricity grid mix 1kV-60kV ts			6.06739e-06	6.03375e-06	1.11767e-06	4.64928e-06	7.13083e-07	4.66257e-08	5.1418e-08	4.25509e-08	1.4573e-07	5.97883e-07	1.18704e-05	1.01061e-07	2.6687e-06	2.39954e-06	3.17311e-06	3.20881e-06	6.33729e-06	1.54775e-06	1.43458e-06
			DE: X.09.oe4 - Process exhaust ventilators -rev4- (001) <LC>				3.64043e-06	3.62025e-06	6.70601e-07	2.78957e-06	4.2785e-07	2.79754e-08	3.08508e-08	2.55305e-08	8.7438e-08	3.5873e-07	7.12226e-06	6.06366e-08	1.60122e-06	1.43972e-06	1.90387e-06	1.92529e-06	3.80237e-06	9.28649e-07	8.60746e-07
				DE: Electricity grid mix 1kV-60kV ts			3.64043e-06	3.62025e-06	6.70601e-07	2.78957e-06	4.2785e-07	2.79754e-08	3.08508e-08	2.55305e-08	8.7438e-08	3.5873e-07	7.12226e-06	6.06366e-08	1.60122e-06	1.43972e-06	1.90387e-06	1.92529e-06	3.80237e-06	9.28649e-07	8.60746e-07
			DE: Electricity grid mix 1kV-60kV ts				0.00108701	0.00108098	0.000200237	0.000832948	0.000127753	8.35329e-06	9.21185e-06	7.62325e-06	2.61084e-05	0.000107114	0.00212666	1.81057e-05	0.000478114	0.000429892	0.000568482	0.000574878	0.00113537	0.000277289	0.000257013
			DE: Sludge (acid/basic) ts				0.000229558	0.000229486	3.17765e-05	2.7696e-05	2.24722e-06	8.22852e-07	7.79374e-08	7.56579e-06	0.000128496	6.96969e-07	1.47269e-05	0.000106631	7.01634e-06	0.000175799	0.000181194	0.000183844	0.00021801	4.40299e-05	0.0055415
			DE: Sodium hydroxide mix (50%) ts				0.000211599	0.000210914	5.84437e-05	0.000173161	2.80764e-05	2.04871e-06	1.86167e-06	1.72271e-06	6.19423e-06	1.54242e-05	0.000312191	3.77939e-06	9.70268e-05	0.0001348	0.000186097	0.000187544	0.000182127	7.49386e-05	4.11168e-05
			DE: Tap water from groundwater ts				-1.38603e-05	-1.48957e-05	-3.8764e-06	-1.14579e-05	-0.0045926	-3.6172e-06	-3.577e-06	-3.25051e-06	-7.47013e-06	-3.98114e-07	-9.04118e-06	-3.33144e-06	-4.97011e-05	-0.00068039	-9.27473e-06	-9.33768e-06	-2.20366e-05	-4.25796e-06	-2.81695e-06
			EU-28: Compressed air ts				3.87317e-05	3.85382e-05	1.10593e-05	4.13219e-05	1.06033e-05	3.50726e-07	2.12432e-07	3.38962e-07	9.2213e-07	1.5174e-05	5.6305e-05	7.17671e-07	1.26313e-05	1.07279e-05	2.22853e-05	2.25046e-05	2.62014e-05	1.52747e-05	8.25635e-06
			GLO: market for iron(III) chloride, without water, in 14% iron solution state ecoinvent 3.5				0.000101945	0.000100806	0.000155746	0.000107754	6.14789e-05	0.000292113	0.000193552	0.000198908	0.000413143	0.000132827	0.000118388	0.000271581	0.000104436	0.000215239	0.000155813	0.000156266	0.000183691	0.00015124	0.000655021
			RER: market for aluminium sulfate, powder ecoinvent 3.5				0.000123951	0.000123828	0.00028006	0.000159846	0.000112564	0.000349217	0.000212	0.00143227	0.000447418	0.000165391	0.000112933	0.000338151	9.04839e-05	0.000964513	0.000209584	0.000210148	0.000120556	0.000365365	0.000651015
			RER: market for calcium chloride ecoinvent 3.5				8.29715e-05	8.11363e-05	0.000142889	6.9952e-05	0.000125344	0.000178396	0.00012476	0.000128183	0.000291101	3.6647e-05	0.000232235	0.000172709	0.000130824	0.000154108	0.000115495	0.000115653	6.80169e-05	0.000228965	0.000494473
		DE: X.07 - acidic exhaust air washer -rev5- (001) <Mfg>					7.74473e-12	7.71167e-12	1.56359e-12	6.00859e-12	2.88082e-11	1.04242e-13	9.17638e-14	1.07262e-13	2.49531e-13	7.26013e-13	1.43941e-11	1.70748e-13	3.69739e-12	7.53367e-12	4.53467e-12	4.58112e-12	8.23331e-12	2.11563e-12	1.84384e-12
			DE: X.03 - ultrapure water system -rev4- (001) <Mfg>				1.10962e-12	1.11031e-12	2.20422e-13	8.55825e-13	2.80085e-11	5.06284e-14	3.51093e-14	5.92464e-14	8.32576e-14	1.05899e-13	2.04526e-12	5.86474e-14	7.54404e-13	4.59206e-12	5.96031e-13	6.02191e-13	1.5446e-12	2.92847e-13	3.3041e-13
				CH: ion-exchanger production for water treatment ecoinvent 3.5			1.09979e-14	1.10289e-14	1.0009e-14	8.89184e-15	3.21874e-15	2.08691e-14	4.79263e-15	3.2395e-14	1.35334e-14	3.51085e-15	5.64263e-15	2.15218e-14	6.41906e-15	5.95673e-14	9.17325e-15	8.98137e-15	3.51212e-13	8.2075e-15	7.3446e-14
				DE: Electricity grid mix 1kV-60kV ts			1.01444e-12	1.00882e-12	1.8687e-13	7.77342e-13	1.19225e-13	7.79564e-15	8.59688e-15	7.11434e-15	2.43655e-14	9.99636e-14	1.98469e-12	1.6897e-14	4.46196e-13	4.01194e-13	5.30532e-13	5.36501e-13	1.05957e-12	2.58778e-13	2.39855e-13
				DE: Tap water from groundwater ts			8.41591e-14	9.04461e-14	2.35373e-14	6.95716e-14	2.7886e-11	2.19635e-14	2.17194e-14	1.97369e-14	4.53583e-14	2.41733e-15	5.48976e-14	2.02284e-14	3.01783e-13	4.13129e-12	5.63157e-14	5.66979e-14	1.33805e-13	2.58541e-14	1.71044e-14
				DE: X.03 - ultra pure water system -rev4- (001) ecoinvent 3.5 <u-so>			4.34197e-22	4.34197e-22	0	0	-8.09565e-23	0	3.19677e-19	0	0	0	0	0	3.20554e-19	0	0	0	0	0	0
				EU-28: Compressed air ts			1.88029e-17	1.87089e-17	5.36889e-18	2.00603e-17	5.14754e-18	1.70265e-19	1.03128e-19	1.64554e-19	4.47662e-19	7.36645e-18	2.73341e-17	3.48404e-19	6.13206e-18	5.20801e-18	1.08187e-17	1.09252e-17	1.27198e-17	7.41532e-18	4.00817e-18
			DE: Electricity grid mix 1kV-60kV ts				5.32061e-12	5.29112e-12	9.80106e-13	4.07705e-12	6.25316e-13	4.0887e-14	4.50894e-14	3.73137e-14	1.27794e-13	5.24295e-13	1.04094e-11	8.86224e-14	2.34023e-12	2.1042e-12	2.78256e-12	2.81387e-12	5.5573e-12	1.35725e-12	1.25801e-12
			DE: Sodium hydroxide mix (50%) ts				1.3145e-12	1.31024e-12	3.63065e-13	1.07571e-12	1.74417e-13	1.2727e-14	1.15651e-14	1.07018e-14	3.84799e-14	9.58187e-14	1.9394e-12	2.34784e-14	6.02751e-13	8.37405e-13	1.15607e-12	1.16506e-12	1.13141e-12	4.65535e-13	2.55426e-13
		DE: X.08 - caustic exhaust air washer -rev4- (001) <Mfg>					0.000602407	0.000599689	0.000265001	0.000550879	0.00158308	1.01119e-05	6.40059e-06	7.73011e-06	2.79395e-05	5.57654e-05	0.00110347	1.81687e-05	0.000268986	0.000452175	0.000316902	0.000319529	0.000624349	0.000383039	0.000152886
			DE: X.03 - ultrapure water system -rev4- (001) <Mfg>				6.02524e-05	6.02901e-05	1.19689e-05	4.64714e-05	0.00152086	2.74913e-06	1.90644e-06	3.21708e-06	4.52089e-06	5.75033e-06	0.000111058	3.18456e-06	4.09642e-05	0.000249349	3.23645e-05	3.2699e-05	8.38719e-05	1.59016e-05	1.79413e-05
				CH: ion-exchanger production for water treatment ecoinvent 3.5			5.97187e-07	5.98872e-07	5.43488e-07	4.82828e-07	1.74778e-07	1.1332e-06	2.6024e-07	1.75905e-06	7.34864e-07	1.90639e-07	3.06395e-07	1.16863e-06	3.48555e-07	3.23451e-06	4.98108e-07	4.87689e-07	1.90708e-05	4.45667e-07	3.98812e-06
				DE: Electricity grid mix 1kV-60kV ts			5.50843e-05	5.4779e-05	1.0147e-05	4.22097e-05	6.4739e-06	4.23303e-07	4.66811e-07	3.86309e-07	1.32305e-06	5.42803e-06	0.000107769	9.17508e-07	2.42284e-05	2.17848e-05	2.88079e-05	2.9132e-05	5.75347e-05	1.40516e-05	1.30242e-05
				DE: Tap water from groundwater ts			4.56984e-06	4.91123e-06	1.27808e-06	3.77774e-06	0.00151421	1.19262e-06	1.17936e-06	1.07172e-06	2.46296e-06	1.31261e-07	2.98094e-06	1.0984e-06	1.63868e-05	0.000224329	3.05794e-06	3.0787e-06	7.26562e-06	1.40388e-06	9.2877e-07
				DE: X.03 - ultra pure water system -rev4- (001) ecoinvent 3.5 <u-so>			2.35769e-14	2.35769e-14	0	0	-4.39594e-15	0	1.73585e-11	0	0	0	0	0	1.74061e-11	0	0	0	0	0	0
				EU-28: Compressed air ts			1.021e-09	1.0159e-09	2.91531e-10	1.08928e-09	2.79512e-10	9.24539e-12	5.59988e-12	8.9353e-12	2.4308e-11	3.99999e-10	1.48424e-09	1.89184e-11	3.32971e-10	2.82795e-10	5.87458e-10	5.93238e-10	6.90688e-10	4.02652e-10	2.17644e-10
			DE: Electricity grid mix 1kV-60kV ts				0.000493426	0.000490691	9.08936e-05	0.0003781	5.79909e-05	3.7918e-06	4.18153e-06	3.46042e-06	1.18514e-05	4.86224e-05	0.000965355	8.21871e-06	0.00021703	0.000195141	0.000258051	0.000260954	0.000515376	0.00012587	0.000116666
			DE: Sulphuric acid (96%) ts				4.87281e-05	4.87078e-05	0.000162139	0.000126308	4.22666e-06	3.57098e-06	3.12626e-07	1.0526e-06	1.15672e-05	1.39269e-06	2.70588e-05	6.76543e-06	1.09916e-05	7.68491e-06	2.64868e-05	2.58763e-05	2.51017e-05	0.000241268	1.82786e-05
		DE: X.09.oe1 - Process exhaust ventilators -rev4- (001) <LC>					6.0535e-05	6.01994e-05	1.11511e-05	4.63864e-05	7.1145e-06	4.6519e-07	5.13003e-07	4.24535e-07	1.45396e-06	5.96514e-06	0.000118433	1.0083e-06	2.66259e-05	2.39405e-05	3.16585e-05	3.20147e-05	6.32279e-05	1.54421e-05	1.43129e-05
			DE: Electricity grid mix 1kV-60kV ts				6.0535e-05	6.01994e-05	1.11511e-05	4.63864e-05	7.1145e-06	4.6519e-07	5.13003e-07	4.24535e-07	1.45396e-06	5.96514e-06	0.000118433	1.0083e-06	2.66259e-05	2.39405e-05	3.16585e-05	3.20147e-05	6.32279e-05	1.54421e-05	1.43129e-05
		DE: X.09.oe3 - Process exhaust ventilators -rev4- (001) <LC>					5.47247e-05	5.44214e-05	1.00808e-05	4.19341e-05	6.43164e-06	4.2054e-07	4.63764e-07	3.83787e-07	1.31441e-06	5.39259e-06	0.000107065	9.11518e-07	2.40703e-05	2.16426e-05	2.86198e-05	2.89418e-05	5.71591e-05	1.39599e-05	1.29391e-05
			DE: Electricity grid mix 1kV-60kV ts				5.47247e-05	5.44214e-05	1.00808e-05	4.19341e-05	6.43164e-06	4.2054e-07	4.63764e-07	3.83787e-07	1.31441e-06	5.39259e-06	0.000107065	9.11518e-07	2.40703e-05	2.16426e-05	2.86198e-05	2.89418e-05	5.71591e-05	1.39599e-05	1.29391e-05
		DE: X.09.oe4 - Process exhaust ventilators -rev4- (001) <LC>					5.13467e-05	5.1062e-05	9.45853e-06	3.93456e-05	6.03462e-06	3.94581e-07	4.35136e-07	3.60096e-07	1.23327e-06	5.05972e-06	0.000100456	8.55251e-07	2.25845e-05	2.03066e-05	2.68532e-05	2.71553e-05	5.36308e-05	1.30982e-05	1.21404e-05
			DE: Electricity grid mix 1kV-60kV ts				5.13467e-05	5.1062e-05	9.45853e-06	3.93456e-05	6.03462e-06	3.94581e-07	4.35136e-07	3.60096e-07	1.23327e-06	5.05972e-06	0.000100456	8.55251e-07	2.25845e-05	2.03066e-05	2.68532e-05	2.71553e-05	5.36308e-05	1.30982e-05	1.21404e-05
		DE: X.09.oe5 - Process exhaust ventilators -rev4- (001) <LC>					3.37807e-05	3.35934e-05	6.22272e-06	2.58853e-05	3.97015e-06	2.59593e-07	2.86274e-07	2.36906e-07	8.11364e-07	3.32876e-06	6.60897e-05	5.62665e-07	1.48582e-05	1.33596e-05	1.76666e-05	1.78653e-05	3.52834e-05	8.61722e-06	7.98712e-06
			DE: Electricity grid mix 1kV-60kV ts				3.37807e-05	3.35934e-05	6.22272e-06	2.58853e-05	3.97015e-06	2.59593e-07	2.86274e-07	2.36906e-07	8.11364e-07	3.32876e-06	6.60897e-05	5.62665e-07	1.48582e-05	1.33596e-05	1.76666e-05	1.78653e-05	3.52834e-05	8.61722e-06	7.98712e-06
		DE: X.09.oe6 - Process exhaust ventilators -rev4- (001) <LC>					2.6349e-05	2.62029e-05	4.85372e-06	2.01905e-05	3.09672e-06	2.02482e-07	2.23294e-07	1.84786e-07	6.32864e-07	2.59643e-06	5.15499e-05	4.38879e-07	1.15894e-05	1.04205e-05	1.37799e-05	1.3935e-05	2.75211e-05	6.72143e-06	6.22996e-06
			DE: Electricity grid mix 1kV-60kV ts				2.6349e-05	2.62029e-05	4.85372e-06	2.01905e-05	3.09672e-06	2.02482e-07	2.23294e-07	1.84786e-07	6.32864e-07	2.59643e-06	5.15499e-05	4.38879e-07	1.15894e-05	1.04205e-05	1.37799e-05	1.3935e-05	2.75211e-05	6.72143e-06	6.22996e-06
		DE: X.09.oe7 - Process exhaust ventilators -rev4- (001) <LC>					1.21611e-07	1.20936e-07	2.24018e-08	9.3187e-08	1.42925e-08	9.34533e-10	1.03059e-09	8.5286e-10	2.92091e-09	1.19835e-08	2.37923e-07	2.0256e-09	5.34895e-08	4.80947e-08	6.35996e-08	6.43152e-08	1.2702e-07	3.1022e-08	2.87536e-08
			DE: Electricity grid mix 1kV-60kV ts				1.21611e-07	1.20936e-07	2.24018e-08	9.3187e-08	1.42925e-08	9.34533e-10	1.03059e-09	8.5286e-10	2.92091e-09	1.19835e-08	2.37923e-07	2.0256e-09	5.34895e-08	4.80947e-08	6.35996e-08	6.43152e-08	1.2702e-07	3.1022e-08	2.87536e-08
		DE: X.10 - general exhausts to air filter <LC>					8.34714e-07	8.31188e-07	1.76289e-06	7.79943e-07	2.29616e-07	2.09901e-06	1.10214e-06	3.48279e-06	2.93243e-06	3.67293e-07	5.17881e-07	2.35711e-06	8.52955e-07	5.62015e-06	1.16835e-06	1.1439e-06	6.42962e-07	3.24681e-06	8.41481e-06
			GLO: market for air filter, central unit, 600 m3/h ecoinvent 3.5				8.22638e-07	8.19112e-07	1.75965e-06	7.78706e-07	2.29455e-07	2.05919e-06	1.10159e-06	3.48009e-06	2.91438e-06	3.669e-07	5.15603e-07	2.31979e-06	4.66044e-07	5.61942e-06	1.15338e-06	1.1299e-06	6.31642e-07	3.24369e-06	8.35506e-06
			RoW: treatment of used air filter, central unit, 600 m3/h ecoinvent 3.5				1.20756e-08	1.20758e-08	3.23962e-09	1.23697e-09	1.60335e-10	3.98227e-08	5.46301e-10	2.69954e-09	1.80447e-08	3.92548e-10	2.27784e-09	3.73246e-08	3.86911e-07	7.30305e-10	1.49733e-08	1.4e-08	1.13201e-08	3.1185e-09	5.9747e-08
		DE: Hazardous waste (statistical average) (no C, worst case scenario incl. landfill) ts					-8.5014e-07	-8.4643e-07	-5.01443e-07	-5.46856e-07	-6.87652e-08	-1.87451e-08	-3.21116e-09	-1.28797e-07	-2.17765e-06	-3.07647e-08	-7.04385e-07	-1.80208e-06	-2.08182e-07	-6.58772e-06	-2.25161e-06	-2.28223e-06	-1.81953e-06	-6.82028e-07	-9.31914e-05
		DE: Municipal waste water treatment (mix) ts					0.0016308	0.00249708	0.000351252	0.000590339	-0.0682416	0.00283543	0.00286827	0.00258676	0.00573172	5.70548e-05	0.00123893	0.00249964	0.0388075	-0.00146532	0.00100511	0.0010172	0.0137718	0.000472621	0.000377927
		DE: Municipal waste water treatment (mix) ts					0.000254617	0.000389868	5.48409e-05	9.21694e-05	-0.0106545	0.000442695	0.000447822	0.000403869	0.000894891	8.90794e-06	0.000193433	0.000390268	0.006059	-0.00022878	0.000156927	0.000158815	0.00215018	7.37901e-05	5.90056e-05
		DE: treatment of waste, from silicon wafer production, underground deposit ecoinvent 3.5					-2.79531e-06	-2.14561e-06	-3.56175e-06	-2.26605e-06	-5.68888e-07	-2.55661e-06	-2.69427e-06	-9.45552e-06	-2.06189e-06	-3.36053e-07	-1.36914e-05	-2.46956e-06	-1.27994e-06	-2.56059e-05	-4.02532e-06	-3.82018e-06	-1.43248e-06	-2.64524e-06	-4.95148e-06
		DE: X.12 - exhaust (VOC) to air -rev4- (001) <u-so>					0	0	0	0	0	1.86438e-07	0	0	0	0	0	1.57989e-08	0	0	0	0	0	0	5.02206e-06
	DE: C - module production (007) <Mfg>						0.217135	0.210952	0.152315	0.175646	0.0436174	0.0426523	0.0251124	0.0294011	0.0538493	0.0322221	0.406786	0.053396	0.0848524	0.358554	0.23545	0.236975	0.141696	0.194955	0.314594
		DE: C.01 - module assembly (007) <Mfg>					0.213566	0.213074	0.148754	0.17202	0.0426757	0.036839	0.0217804	0.0259139	0.0493866	0.0302299	0.275393	0.0478088	0.0717492	0.356453	0.229148	0.230787	0.134003	0.19157	0.302463
			DE: cell fixation tape (generic tape) <Mfg>				0.000255936	0.00023022	8.77587e-05	0.00028351	0.00105642	2.54428e-05	6.60779e-05	3.53896e-06	-2.28872e-05	1.55527e-05	0.00472397	2.68129e-05	0.00217015	0.000198542	0.000284077	0.000282234	0.0011369	0.000119836	9.18957e-05
				DE: Elastomer joint tape, polyurethane (EN15804 A1-A3) ts			0.00010449	0.000104314	3.18242e-05	0.00013133	2.07733e-05	2.97464e-06	1.60701e-06	1.74661e-06	1.20669e-05	5.29755e-06	0.000115321	4.97038e-06	5.8805e-05	6.91182e-05	8.92376e-05	8.75879e-05	0.000163711	4.22615e-05	2.3365e-05
				DE: Joint sealing tape fabric tape (EN15804 A1-A3) ts			0.000151446	0.000125905	5.59345e-05	0.00015218	0.00103565	2.24682e-05	6.44709e-05	1.79235e-06	-3.49541e-05	1.02552e-05	0.00460865	2.18425e-05	0.00211134	0.000129424	0.00019484	0.000194646	0.000973194	7.75749e-05	6.85307e-05
			DE: copper smartwires (SWCT wires) <Mfg>				0.001637	0.00163134	0.00157725	0.00117948	0.000698765	0.000615493	7.83437e-06	3.8273e-05	0.00207639	5.34192e-05	0.0571974	0.00518507	0.000449959	0.135358	0.00168202	0.00170079	0.00302018	0.00212825	0.0951143
				DE: Copper mix (99,999% from electrolysis) ts			0.00135006	0.00134601	0.00152443	0.000959703	0.000665102	0.000613292	5.40702e-06	3.62656e-05	0.0020695	2.52682e-05	0.0566365	0.00518029	0.000323957	0.135244	0.00153196	0.00154905	0.00272094	0.00205511	0.0950465
				DE: District heating mix (EN15804 B6) ts			1.28455e-06	1.25295e-06	1.99442e-07	8.82041e-07	8.98537e-08	5.88227e-09	6.53895e-09	4.06363e-09	2.82597e-08	2.01278e-09	2.0242e-06	1.63321e-08	3.56875e-07	3.31197e-07	6.6037e-07	6.66895e-07	8.79026e-07	2.75028e-07	2.3614e-07
				DE: Electricity grid mix 1kV-60kV ts			0.000285659	0.000284076	5.26211e-05	0.000218893	3.35727e-05	2.19519e-06	2.42081e-06	2.00334e-06	6.86113e-06	2.8149e-05	0.000558873	4.75806e-06	0.000125645	0.000112973	0.000149393	0.000151074	0.000298367	7.28697e-05	6.75414e-05
			DE: interconnection ribbon (copper wires) <Mfg>				0.000744503	0.000742099	0.000779252	0.000532814	0.000342388	0.000309186	3.27118e-06	1.87081e-05	0.0010432	1.9093e-05	0.0286338	0.00260847	0.00019159	0.0680981	0.000805061	0.000814041	0.00143729	0.00105096	0.047855
				DE: Copper mix (99,999% from electrolysis) ts			0.000679524	0.000677486	0.000767291	0.000483046	0.000334765	0.000308688	2.72151e-06	1.82535e-05	0.00104164	1.27182e-05	0.0285068	0.00260739	0.000163057	0.0680724	0.000771081	0.000779679	0.00136953	0.0010344	0.0478397
				DE: District heating mix (EN15804 B6) ts			2.90883e-07	2.83727e-07	4.51633e-08	1.99736e-07	2.03472e-08	1.33203e-09	1.48073e-09	9.20199e-10	6.39934e-09	4.55789e-10	4.58375e-07	3.69836e-09	8.08134e-08	7.49987e-08	1.49539e-07	1.51017e-07	1.99053e-07	6.22794e-08	5.34734e-08
				DE: Electricity grid mix 1kV-60kV ts			6.46874e-05	6.43288e-05	1.1916e-05	4.95683e-05	7.60252e-06	4.971e-07	5.48192e-07	4.53656e-07	1.5537e-06	6.37432e-06	0.000126557	1.07746e-06	2.84523e-05	2.55827e-05	3.38301e-05	3.42107e-05	6.7565e-05	1.65013e-05	1.52947e-05
			DE: j-box set (3 junction boxes) <Mfg>				0.00471634	0.00465029	0.00385039	0.00726495	0.00172009	0.00462177	0.00330441	0.00385472	0.00415259	0.00327805	0.00345641	0.00427412	0.0018241	0.00189731	0.00496386	0.00479429	0.00249658	0.00426306	0.00757519
				GLO: market for polyethylene terephthalate, granulate, amorphous ecoinvent 3.5			0.0027478	0.00274526	0.00237407	0.00400011	0.000947787	0.00256337	0.00152725	0.00227242	0.00278451	0.000751291	0.00106851	0.00248515	0.000782216	0.00121487	0.00300715	0.00291867	0.00120525	0.00236333	0.00627703
				GLO: market for polyethylene, high density, granulate ecoinvent 3.5			0.000283682	0.00028528	0.000154795	0.000592286	5.06956e-05	9.46443e-05	1.02941e-05	0.000136677	2.81256e-05	1.98913e-06	1.34849e-05	9.11479e-05	9.7126e-06	6.78513e-06	0.000330337	0.000303077	1.14367e-05	0.000202909	0.000140147
				GLO: market for polypropylene, granulate ecoinvent 3.5			0.00046837	0.000470125	0.00024059	0.000943273	0.000103666	0.000133548	3.31846e-05	0.000187797	4.16602e-05	2.99345e-06	2.16657e-05	0.000130602	3.99417e-05	1.12153e-05	0.000524135	0.000487833	1.7992e-05	0.00031574	0.000228099
				RER: injection moulding ecoinvent 3.5			0.00121648	0.00114962	0.00108094	0.00172928	0.000617944	0.00183021	0.00173368	0.00125783	0.00129829	0.00252178	0.00235276	0.00156723	0.000992234	0.000664444	0.00110224	0.00108471	0.0012619	0.00138108	0.000929915
			DE: Aluminium frame profile, powder coated (EN15804 A1-A3) ts				0.0930933	0.0931939	0.0444426	0.0774255	0.0211568	0.00200002	0.000685681	0.00160676	0.00414125	0.0140235	0.0462841	0.00332646	0.0260551	0.100076	0.069651	0.0702965	0.0423401	0.0600088	0.0167621
			DE: Electricity grid mix 1kV-60kV ts				0.0542969	0.0539959	0.010002	0.0416063	0.00638136	0.000417252	0.000460138	0.000380786	0.00130413	0.00535043	0.106228	0.000904392	0.0238821	0.0214734	0.0283961	0.0287156	0.0567122	0.0138508	0.012838
			DE: Hazardous waste (statistical average) (no C, worst case scenario incl. landfill) ts				-1.30791e-07	-1.3022e-07	-7.7145e-08	-8.41316e-08	-1.05793e-08	-2.88386e-09	-4.94025e-10	-1.9815e-08	-3.35023e-07	-4.73303e-09	-1.08367e-07	-2.77243e-07	-3.2028e-08	-1.0135e-06	-3.46402e-07	-3.51113e-07	-2.79928e-07	-1.04927e-07	-1.43371e-05
			DE: Municipal waste water treatment (mix) ts				7.6231e-06	1.16724e-05	1.64191e-06	2.75951e-06	-0.000318992	1.32541e-05	1.34076e-05	1.20916e-05	2.67926e-05	2.66699e-07	5.79129e-06	1.16844e-05	0.000181403	-6.84955e-06	4.69833e-06	4.75485e-06	6.43754e-05	2.20924e-06	1.7666e-06
			DE: Sealants based on silicone - Deutsche Bauchemie e.V. (DBC) (A5) ts-EPD <p-agg>				8.62908e-07	1.05977e-06	1.05646e-08	1.0225e-08	7.26522e-08	5.84892e-11	2.10123e-11	4.5018e-11	3.12783e-10	8.35404e-10	1.88527e-09	3.56122e-10	3.07606e-09	1.20238e-08	1.22445e-05	7.73937e-06	9.7185e-09	2.10539e-08	2.22741e-09
			DE: Tap water from groundwater ts				3.87132e-06	4.16053e-06	1.08272e-06	3.2003e-06	0.00128276	1.01032e-06	9.99092e-07	9.079e-07	2.08648e-06	1.11197e-07	2.52529e-06	9.30505e-07	1.3882e-05	0.00019004	2.59052e-06	2.60811e-06	6.15504e-06	1.18929e-06	7.86803e-07
			DE: Tap water from groundwater ts				-2.90349e-06	-3.12039e-06	-8.12039e-07	-2.40022e-06	-0.000962069	-7.5774e-07	-7.49319e-07	-6.80925e-07	-1.56486e-06	-8.33979e-08	-1.89397e-06	-6.97879e-07	-1.04115e-05	-0.00014253	-1.94289e-06	-1.95608e-06	-4.61628e-06	-8.91969e-07	-5.90103e-07
			DE: treatment of waste, from silicon wafer production, underground deposit ecoinvent 3.5				-4.30048e-07	-3.30093e-07	-5.47961e-07	-3.48623e-07	-8.75212e-08	-3.93325e-07	-4.14504e-07	-1.45469e-06	-3.17214e-07	-5.17004e-08	-2.10636e-06	-3.79933e-07	-1.96914e-07	-3.93937e-06	-6.1928e-07	-5.8772e-07	-2.20382e-07	-4.06959e-07	-7.61766e-07
			EU-25: Copper wire; technology mix; market mix, at plant; cross section 1 mm ECI/ELCD				0.00029274	0.000291142	0.00028	0.000243602	0.000208015	2.58865e-05	1.34766e-06	1.09022e-05	0.000120605	7.39929e-05	0	3.45418e-05	2.96481e-05	0.0085683	0.000325476	0.000329174	0.000306746	0.000359702	0.000377165
			EU-28: Compressed air ts				4.94883e-06	4.92411e-06	1.41307e-06	5.27979e-06	1.35481e-06	4.4813e-08	2.7143e-08	4.331e-08	1.17823e-07	1.93882e-06	7.19422e-06	9.16985e-08	1.61393e-06	1.37073e-06	2.84744e-06	2.87546e-06	3.34781e-06	1.95168e-06	1.05493e-06
			GLO: market for electronics scrap ecoinvent 3.5				-8.14649e-07	-8.14358e-07	-9.69046e-07	-7.63349e-07	-8.15428e-08	-5.94116e-07	-2.03126e-07	-5.67115e-07	-6.34314e-07	-1.28681e-07	-9.94964e-07	-1.2861e-06	-1.33351e-07	-4.48675e-07	-2.72828e-06	-2.72831e-06	-7.9172e-07	-1.03017e-06	-1.05434e-05
			GLO: market for packaging film, low density polyethylene ecoinvent 3.5				0.000187785	0.000183195	0.000134804	0.000333878	7.65803e-05	0.000115169	4.74963e-05	0.000128751	5.84628e-05	4.26841e-05	0.000129876	0.000106497	5.28358e-05	1.70635e-05	0.000230911	0.000216487	4.10515e-05	0.000158893	0.000152122
			GLO: market for solar glass, low-iron ecoinvent 3.5				0.0582746	0.0580848	0.0875709	0.0430918	0.011016	0.0284885	0.0171769	0.0198297	0.0364638	0.00735736	0.0287107	0.031162	0.0168968	0.0207191	0.122751	0.123586	0.0264178	0.109596	0.121652
			RER: market for ethylene vinyl acetate copolymer ecoinvent 3.5				1.57643e-05	1.57318e-05	9.80534e-06	3.2222e-05	7.98508e-06	1.11016e-05	6.65289e-06	8.64847e-06	1.21584e-05	5.40812e-06	5.00068e-06	1.03086e-05	4.37022e-06	5.66077e-06	1.58419e-05	1.49653e-05	5.72033e-06	1.11614e-05	1.95395e-05
			RER: market for silicone product ecoinvent 3.5				5.31892e-06	5.40293e-06	4.90503e-06	6.01239e-06	6.44898e-06	5.30735e-06	3.6981e-06	3.74861e-06	4.93671e-06	3.10441e-06	4.80493e-06	4.76702e-06	4.28724e-06	1.78786e-06	6.11068e-06	6.01572e-06	1.03001e-05	5.15475e-06	6.01647e-06
			RoW: treatment of electronics scrap, metals recovery in copper smelter ecoinvent 3.5				3.22358e-05	3.22626e-05	1.27463e-05	1.19939e-05	1.94141e-06	0.00019134	3.74418e-06	1.9025e-05	5.74669e-06	5.24419e-06	8.07034e-06	0.000155231	2.12736e-06	3.23736e-06	1.90583e-05	1.89866e-05	9.66748e-06	1.38659e-05	4.24229e-05
		DE: C.02 - module packaging (007) <Mfg>					0.00356944	-0.00212172	0.00356117	0.00362646	0.000941681	0.00581325	0.00333201	0.0034872	0.00446556	0.00198592	0.131395	0.00559199	0.0131148	0.00209852	0.0063061	0.00618713	0.00769608	0.00338608	0.0121237
			GLO: market for EUR-flat pallet ecoinvent 3.5				0.000895684	-0.00474951	0.00132897	0.00106053	0.000249987	0.0010511	0.00062333	0.00158729	0.00113064	0.000342254	0.101163	0.00113297	0.000347541	0.000950739	0.00220944	0.00211696	0.00097549	0.000981013	0.00428094
			RER: market for corrugated board box ecoinvent 3.5				0.00267375	0.00262778	0.0022322	0.00256594	0.000691694	0.00476215	0.00270868	0.00189991	0.00332542	0.00164789	0.0302326	0.00446266	0.0127541	0.00115271	0.00408516	0.00407018	0.00671569	0.00240506	0.00785953
	DE: Lead emissions -rev5- (001) <u-so>						0	0	0	0	0	0.000413134	0	0.000198979	0.0108551	0	0	0.000351548	0	0	0	0	0	0	0.0118562

## Sheet: SHJ_unit
Inventory item							GWP	GWP(+BC)	PMFP	FDP	FWC	FETP	FEP	HTP(C)	HTP(NC)	IRP	LU	METP	MEP	MDP	POFP(E)	POFP(HH)	POFP	TAP	TETP
Life Cycle SHJ module [default] -rev5- (002) <LC>							411	412	0.644	157	14	3.53	0.209	19	440	70.1	16.5	5.92	0.0294	1.9	0.84	0.828	0.000187	1.51	578
	CN: A - wafer production (007) <Mfg>						296	299	0.521	122	13.2	2.97	0.189	17.4	311	67.1	8.03	3.9	0.025	0.559	0.588	0.578	0.000144	1.16	338
		CN: A.01 - wafer fabrication (007) <Mfg>					293	297	0.518	120	13.2	2.96	0.189	17.4	310	67.1	7.54	3.89	0.0249	0.556	0.582	0.572	0.000144	1.15	334
			CH: market for brass ecoinvent 3.5				0.0602	0.0592	0.0011	0.0184	0.000855	0.0211	0.000836	0.0398	7.69	0.00324	0.00423	0.0347	5.37e-05	0.0134	0.000509	0.0005	1.08e-07	0.0032	18.4
			CN: Electricity grid mix 1kV-60kV ts				12	12	0.00967	2.81	0.0935	0.000547	3.75e-06	0.00531	0.526	0.0224	0.0804	0.00393	7.77e-05	0.00706	0.0226	0.0225	2.1e-06	0.0275	4.58
			CN: single-Si wafer production, photovoltaic (007) ecoinvent 3.5 <u-so>				0	0	0	0	-0.104	0.0217	0.000311	0.00161	0.677	0	0	0.0266	0.00561	0	0	0	0	0	1.35e-18
			CN: Thermal energy from natural gas ts				0.519299	0.519316	0.000117055	0.199448	2.11531e-05	2.16046e-05	1.65148e-08	0.000178319	0.00208294	1.46649e-05	0.000180955	3.49106e-05	1.13209e-07	0.000115491	0.000717024	0.000710725	2.04676e-07	0.000326863	0.019461
			EU-28: Tap water from groundwater ts				9.9094e-07	1.06275e-06	4.54108e-10	3.23262e-07	1.12964e-05	2.20702e-09	1.29752e-10	1.0803e-08	5.21573e-07	9.60756e-09	2.06535e-08	3.15553e-09	2.52422e-10	2.39191e-07	1.31806e-09	1.3051e-09	7.25249e-13	1.15625e-09	2.62113e-07
			GLO: glass wool mat production, without cullet ecoinvent 3.5				0.0620543	0.0618959	0.000130189	0.0232168	0.000661512	0.00073169	2.8565e-05	0.00546951	0.0745619	0.00548415	0.00109587	0.000986154	2.5925e-06	0.000151624	0.000182019	0.000178362	3.03973e-08	0.000285646	0.102746
			GLO: market for acetic acid, without water, in 98% solution state ecoinvent 3.5				0.128004	0.127725	0.000232619	0.0853605	0.00336055	0.00120517	5.01022e-05	0.00454432	0.16027	0.00976282	0.00209927	0.00172596	3.63183e-06	0.000344327	0.000320197	0.000300054	6.56504e-08	0.000485354	0.338929
			GLO: market for alkylbenzene sulfonate, linear, petrochemical ecoinvent 3.5				0.771372	0.769356	0.00152431	0.627467	0.00928118	0.0146814	0.000287777	0.0336865	1.04514	0.0210079	0.0180976	0.0195006	2.35422e-05	0.00254564	0.00238911	0.0022454	2.36537e-07	0.00352115	2.72747
			GLO: market for silicon carbide ecoinvent 3.5				35.3696	35.4518	0.0696159	11.0399	0.222098	0.268581	0.0155593	1.16727	24.2126	4.36841	0.54396	0.352108	0.00112414	0.0162856	0.0676579	0.0670592	1.18644e-05	0.137903	30.1646
			GLO: market for sodium hydroxide, without water, in 50% solution state ecoinvent 3.5				0.0387535	0.0386081	8.96665e-05	0.0138962	0.000981889	0.000458804	2.24579e-05	0.00192154	0.058499	0.00443506	0.000776681	0.000636559	2.25323e-06	0.000105319	9.88861e-05	9.78928e-05	4.16333e-08	0.000154502	0.119205
			GLO: market for steel, low-alloyed, hot rolled ecoinvent 3.5				5.4446	5.4263	0.0133861	1.78082	0.0576442	0.184019	0.00497544	4.15395	27.0342	0.225148	0.104722	0.270149	0.00019575	0.285131	0.0162789	0.015404	1.62675e-06	0.0196096	54.2043
			GLO: market for wafer factory ecoinvent 3.5				0.738523	0.692998	0.00230027	0.2204	0.00624481	0.037951	0.000896362	0.203766	6.89103	0.0352466	0.0775773	0.0562671	0.000100244	0.0291699	0.00238424	0.00230081	3.21554e-07	0.00569548	18.6115
			GLO: market for waste, from silicon wafer production ecoinvent 3.5				0.0267802	0.0222178	5.23244e-05	0.008524	0.00015072	0.000186838	9.98438e-06	0.00315156	0.0194059	0.000551054	0.00414373	0.000358974	7.05565e-07	0.000865831	0.00010428	9.97683e-05	7.9652e-09	9.80892e-05	0.173998
			GLO: market for water, completely softened, from decarbonised water, at user ecoinvent 3.5				0.00301076	0.00323312	5.46314e-06	0.000840137	0.115347	5.60309e-05	1.05201e-06	0.00040092	0.00536431	0.000109084	9.19751e-05	8.18212e-05	3.07807e-07	5.95866e-05	8.28153e-06	8.00649e-06	9.77518e-10	9.28658e-06	0.0212664
			GLO: market for wire drawing, steel ecoinvent 3.5				0.872376	0.842531	0.00153462	0.243668	0.045034	0.0239501	0.00040747	0.732278	1.05597	0.0360817	0.0315078	0.0324678	6.47545e-05	0.0113373	0.00181409	0.00173512	3.56859e-07	0.00261373	1.3308
			RER: hydrochloric acid production, from the reaction of hydrogen with chlorine ecoinvent 3.5				0.00492582	0.00497137	9.328e-06	0.0024626	0.000159557	9.70143e-05	4.81306e-06	0.000360565	0.0128947	0.00190415	0.000201526	0.000132498	4.33266e-07	2.50266e-05	1.09789e-05	1.08229e-05	5.77643e-09	2.54834e-05	0.0232195
			RER: market for acrylic binder, without water, in 34% solution state ecoinvent 3.5				0.00543501	0.00542867	8.16755e-06	0.00324993	0.000125173	5.579e-05	2.20134e-06	0.000267203	0.00969765	0.00054374	0.000139483	8.11637e-05	1.55071e-07	1.83522e-05	1.25243e-05	1.17769e-05	1.77597e-09	2.00482e-05	0.0190994
			RER: market for dipropylene glycol monomethyl ether ecoinvent 3.5				2.4128	2.41625	0.00382235	1.31124	0.0554895	0.0260996	0.00121317	0.105373	3.46671	0.365003	0.0479372	0.0362602	0.000112004	0.00662966	0.00556342	0.00523039	1.76648e-06	0.00849523	6.63985
			RER: market for silicon, single crystal, Czochralski process, photovoltaics ecoinvent 3.5				228.405	231.812	0.407623	97.4764	12.5658	2.30121	0.161382	10.6762	229.037	60.9451	6.51067	2.96834	0.0173933	0.16684	0.448362	0.442005	0.000123599	0.921383	182.056
			RER: market for triethylene glycol ecoinvent 3.5				6.51712	6.54634	0.00686735	4.6277	0.110752	0.0588028	0.00257355	0.231678	7.61561	1.01019	0.112705	0.0814439	0.000185567	0.01561	0.0128984	0.0120264	1.25451e-06	0.0200023	14.6856
		CN: A.02 - wafer packaging (007) <Mfg>					2.40603	1.95542	0.00266554	1.27689	0.0435057	0.0128213	0.000358377	0.0592667	0.883778	0.0665406	0.484591	0.018149	7.50868e-05	0.0031702	0.00543638	0.00514167	3.76216e-07	0.00712432	2.81733
			GLO: market for packaging film, low density polyethylene ecoinvent 3.5				0.569905	0.555972	0.000644779	0.382898	0.00760425	0.00284289	6.97477e-05	0.0172864	0.172112	0.0211922	0.015621	0.00408848	1.12688e-05	0.000242222	0.00140318	0.00129434	5.85611e-08	0.00175555	0.636127
			GLO: market for polystyrene, high impact ecoinvent 3.5				1.4665	1.47147	0.00124704	0.741726	0.0195855	0.00453161	2.1355e-05	0.0236223	0.180796	0.000947077	0.00159537	0.00629194	8.6263e-06	0.000235148	0.00272494	0.00257248	2.069e-08	0.00386572	0.768406
			RER: paper production, woodfree, coated, at integrated mill ecoinvent 3.5				0.369618	-0.0720316	0.000773717	0.152264	0.016316	0.00544676	0.000267275	0.018358	0.53087	0.0444014	0.467375	0.00776862	5.51917e-05	0.00269283	0.00130826	0.00127485	2.96965e-07	0.00150305	1.4128
		CN: A.03 - wafer transport (007) <Mfg>					0.043821	0.0438	0.000104048	0.0156792	0.000130118	0.00023078	4.32294e-06	0.00094712	0.0296159	0.00105476	0.00187794	0.000841292	4.48379e-07	8.55702e-05	0.000316087	0.000311466	1.95705e-08	0.000280454	0.781671
			GLO: market group for transport, freight train ecoinvent 3.5				0.000593374	0.000591891	1.34371e-06	0.000191663	2.9014e-06	4.53303e-06	1.69314e-07	4.78435e-05	0.000509044	2.99803e-05	2.64342e-05	6.77922e-06	1.14715e-08	3.42646e-06	5.35139e-06	5.28044e-06	2.60253e-10	3.02001e-06	0.00164184
			GLO: market group for transport, freight, lorry, unspecified ecoinvent 3.5				0.0331594	0.0331578	4.78174e-05	0.0120488	9.73248e-05	0.000197861	2.76273e-06	0.000699773	0.0263289	0.000624409	0.00176891	0.000791581	3.25916e-07	6.53254e-05	0.000180294	0.000176773	1.45881e-08	0.000109916	0.773941
			GLO: transport, freight, sea, transoceanic ship ecoinvent 3.5				0.00997404	0.00997787	5.47006e-05	0.00340989	2.92834e-05	2.76937e-05	1.34727e-06	0.000185486	0.0027107	0.00039862	6.44371e-05	4.18917e-05	1.08011e-07	1.2766e-05	0.00013017	0.000129158	4.69953e-09	0.000167205	0.00585846
			RoW: treatment of waste, from silicon wafer production, underground deposit ecoinvent 3.5				9.42045e-05	7.24159e-05	1.86578e-07	2.877e-05	6.0859e-07	6.92024e-07	4.36263e-08	1.40179e-05	6.72157e-05	1.75461e-06	1.81625e-05	1.04009e-06	2.98054e-09	4.05232e-06	2.71804e-07	2.53893e-07	2.26285e-11	3.12522e-07	0.000228903
	DE: B - cell (HJT) manufacturing [default] -rev5- (001) <Mfg>						21.3982	21.5497	0.0193364	6.53085	0.157453	0.402253	0.014381	0.961742	107.147	0.663866	1.48813	1.72316	0.0017411	0.617573	0.0481037	0.0474695	1.41336e-05	0.0460052	51.6699
		DE: B.01 - wafer cleaning/ texturing [HJT] (wet chemistry) -rev5- (001) <Mfg>					5.0785	5.05535	0.00321871	1.64738	0.274902	0.0314622	0.000532819	0.0450865	1.61186	0.13665	0.334441	0.0439329	0.000164637	0.0159776	0.00711722	0.00698141	2.37069e-06	0.00834678	5.46913
			DE: Preparation of CellTex proxy <LC>				0.265202	0.265026	0.00027216	0.177959	0.0031932	0.00125519	0.000125834	0.00676799	0.183179	0.0052239	0.00678054	0.00242267	8.73727e-06	0.000619131	0.000897011	0.000825224	5.11696e-08	0.000725774	1.22573
				DE: Sodium hydroxide (caustic soda) mix (100%) ts			0.0190896	0.0190252	8.30091e-06	0.00590243	6.70399e-05	1.49451e-06	8.07765e-08	6.83247e-06	0.000540453	0.000228262	0.00111901	4.30859e-06	6.12658e-07	5.61841e-05	3.36096e-05	3.33251e-05	7.73315e-09	2.45702e-05	0.00514584
				GLO: market for water, ultrapure ecoinvent 3.5			0.0569681	0.0569212	9.97316e-05	0.0198215	0.00148289	0.000374177	4.71445e-05	0.00252232	0.0459546	0.00184119	0.00280505	0.00107924	6.30916e-06	0.000191973	0.000383152	0.00037694	2.61538e-08	0.000226535	0.871224
				RER: market for ethanol, without water, in 99.7% solution state, from ethylene ecoinvent 3.5			0.189144	0.189079	0.000164128	0.152235	0.00164327	0.000879518	7.86084e-05	0.00423884	0.136684	0.00315444	0.00285649	0.00133912	1.81545e-06	0.000370973	0.00048025	0.000414959	1.72826e-08	0.000474669	0.349363
			DE: preparation of hydrogen chloride (36% in H2O) <Mfg>				0.00200141	0.00200158	1.13642e-06	0.000921581	1.28974e-05	2.67124e-06	3.05364e-07	1.69493e-05	0.000434377	2.05586e-05	6.09515e-05	7.94726e-06	7.58087e-08	6.69636e-06	4.54933e-06	4.4472e-06	9.27366e-10	2.9732e-06	0.00773057
				DE: Hydrochloric acid mix (100%) ts			0.00164063	0.0016411	5.04817e-07	0.000796052	3.50622e-06	3.01569e-07	6.79695e-09	9.75401e-07	0.000143346	8.89826e-06	4.31871e-05	1.11243e-06	3.58527e-08	5.4806e-06	2.12282e-06	2.06003e-06	7.61734e-10	1.53855e-06	0.0022131
				GLO: market for water, ultrapure ecoinvent 3.5			0.00036078	0.000360483	6.31602e-07	0.00012553	9.39115e-06	2.36967e-06	2.98567e-07	1.59739e-05	0.000291031	1.16603e-05	1.77644e-05	6.83483e-06	3.9956e-08	1.21577e-06	2.42651e-06	2.38717e-06	1.65632e-10	1.43465e-06	0.00551747
			DE: preparation of hydrogen fluoride (49% in H2O) <Mfg>				0.0732505	0.0726508	0.000379799	0.0429298	0.00370598	0.00130355	4.16847e-05	0.00428322	0.234549	0.00675409	0.00260899	0.00216422	3.02558e-06	0.00058962	0.000297345	0.000292161	3.15996e-08	0.00117108	0.767972
				GLO: market for water, ultrapure ecoinvent 3.5			0.00246425	0.00246223	4.31407e-06	0.000857412	6.41449e-05	1.61857e-05	2.03932e-06	0.000109107	0.00198785	7.9644e-05	0.000121337	4.66843e-05	2.72914e-07	8.30414e-06	1.65739e-05	1.63052e-05	1.13133e-09	9.79917e-06	0.0376863
				RER: market for hydrogen fluoride ecoinvent 3.5			0.0707862	0.0701885	0.000375485	0.0420724	0.00364184	0.00128737	3.96454e-05	0.00417412	0.232561	0.00667445	0.00248765	0.00211754	2.75267e-06	0.000581315	0.000280772	0.000275856	3.04683e-08	0.00116128	0.730286
			DE: preparation of potassium hydroxide (50% in H2O) <Mfg>				0.665132	0.663504	0.00133617	0.236886	0.00592952	0.00721099	0.00033847	0.0295341	1.02285	0.0565908	0.0188579	0.0101861	2.4129e-05	0.00219958	0.0015941	0.00157332	2.8737e-07	0.00255528	2.09229
				GLO: market for potassium hydroxide ecoinvent 3.5			0.659495	0.657872	0.0013263	0.234924	0.00578279	0.00717397	0.000333804	0.0292845	1.0183	0.0564086	0.0185803	0.0100793	2.35047e-05	0.00218059	0.00155619	0.00153602	2.84782e-07	0.00253286	2.00608
				GLO: market for water, ultrapure ecoinvent 3.5			0.00563718	0.00563254	9.86878e-06	0.0019614	0.000146737	3.70261e-05	4.66511e-06	0.000249592	0.00454736	0.000182192	0.000277569	0.000106794	6.24312e-07	1.89964e-05	3.79142e-05	3.72995e-05	2.58801e-09	2.24164e-05	0.0862105
			DE: X.03 - ultrapure water system -rev4- (001) <Mfg>				0.298905	0.299092	9.35793e-05	0.0871161	0.246858	0.000110927	4.57626e-06	0.000706046	0.0217558	0.00466681	0.0218347	0.000199844	1.42815e-05	0.00578593	0.000321483	0.000319573	1.95576e-07	0.000287188	0.122638
				CH: ion-exchanger production for water treatment ecoinvent 3.5			0.00296258	0.00297094	4.24928e-06	0.000905118	2.8369e-05	4.57245e-05	6.24687e-07	0.000386055	0.00353638	0.000154718	6.02393e-05	7.33364e-05	1.21518e-07	7.5054e-05	4.94781e-06	4.76627e-06	4.44702e-08	8.04892e-06	0.0272608
				DE: Electricity grid mix 1kV-60kV ts			0.273267	0.271752	7.9335e-05	0.0791272	0.00105081	1.70803e-05	1.12055e-06	8.47823e-05	0.00636688	0.00440524	0.0211881	5.75773e-05	8.44685e-06	0.000505498	0.000286155	0.000284712	1.34162e-07	0.000253778	0.0890267
				DE: Tap water from groundwater ts			0.0226705	0.024364	9.9927e-06	0.00708183	0.245779	4.81222e-05	2.83098e-06	0.000235207	0.0118525	0.000106528	0.000586073	6.89291e-05	5.713e-06	0.00520537	3.03752e-05	3.00887e-05	1.69423e-08	2.53546e-05	0.00634861
				DE: X.03 - ultra pure water system -rev4- (001) ecoinvent 3.5 <u-so>			1.16962e-10	1.16962e-10	0	0	-7.13526e-13	0	4.16678e-11	0	0	0	0	0	6.06835e-12	0	0	0	0	0	0
				EU-28: Compressed air ts			5.06505e-06	5.03975e-06	2.27935e-09	2.04198e-06	4.53689e-08	3.73052e-10	1.34421e-11	1.96101e-09	1.16977e-07	3.24628e-07	2.91812e-07	1.1872e-09	1.16085e-10	6.56202e-09	5.83533e-09	5.79782e-09	1.61058e-12	7.27205e-09	1.4877e-06
			CH: treatment of waste plastic, industrial electronics, municipal incineration ecoinvent 3.5				0.030507	0.0305095	1.34237e-06	8.89803e-05	8.03819e-06	0.0208942	2.53826e-07	0.000857119	0.0450178	1.67271e-05	5.59132e-06	0.0275574	4.80506e-07	1.78276e-06	8.4428e-06	8.35547e-06	6.59945e-09	3.91467e-06	0.00126719
			CH: treatment of waste polystyrene, municipal incineration ecoinvent 3.5				0.0194729	0.0194737	4.0188e-07	2.10512e-05	3.17337e-06	0.000186767	2.16051e-08	0.000265821	0.00232949	3.26668e-06	1.40724e-06	0.000238806	4.23267e-08	7.9114e-07	2.59767e-06	2.55006e-06	5.88968e-10	1.1489e-06	0.000289049
			DE: Electricity grid mix 1kV-60kV ts				3.50623	3.48679	0.00101793	1.01526	0.0134827	0.000219154	1.43775e-05	0.00108782	0.081692	0.0565227	0.271859	0.000738762	0.00010838	0.00648593	0.00367158	0.00365308	1.7214e-06	0.00325616	1.14228
			DE: Nitrogen (liquid) ts				0.0973332	0.0967965	2.82613e-05	0.0281841	0.000390482	6.09951e-06	4.00023e-07	3.02741e-05	0.00227179	0.00156893	0.00754618	2.05306e-05	3.01041e-06	0.000180434	0.000101939	0.000101425	4.7787e-08	9.04008e-05	0.0317101
			DE: Oxygen (liquid) ts				0.0111354	0.0110738	3.23306e-06	0.00322437	4.39302e-05	6.97088e-07	4.5723e-08	3.46001e-06	0.000259719	0.000179499	0.000863347	2.34776e-06	3.44323e-07	2.06249e-05	1.16616e-05	1.16028e-05	5.46701e-09	1.03418e-05	0.00362777
			EU-28: Compressed air ts				0.0519908	0.0517311	2.33966e-05	0.0209601	0.000465694	3.82924e-06	1.37978e-07	2.0129e-05	0.00120073	0.00333218	0.00299534	1.21862e-05	1.19157e-06	6.73567e-05	5.98975e-05	5.95124e-05	1.6532e-08	7.46448e-05	0.0152707
			GLO: market for packaging film, low density polyethylene ecoinvent 3.5				0.0310952	0.030335	3.51805e-05	0.0208917	0.000414904	0.000155114	3.80558e-06	0.000943181	0.00939082	0.00115629	0.000852316	0.000223076	6.14851e-07	1.32162e-05	7.65606e-05	7.06218e-05	3.19522e-09	9.57865e-05	0.0347084
			GLO: market for polystyrene foam slab ecoinvent 3.5				0.0262508	0.0263623	2.61187e-05	0.012933	0.00039313	0.000113016	2.90763e-06	0.00057036	0.00692592	0.000614371	0.000174976	0.000159022	3.2457e-07	6.5327e-06	7.00411e-05	5.95397e-05	2.47815e-09	7.20853e-05	0.0236109
		DE: B.02 - PECVD of a-Si:H (deposition thin film layer) -rev4- (001) <Mfg>					3.19215	3.17689	0.00102476	0.959167	0.20686	0.000971593	6.48584e-05	0.00473688	0.171976	0.06906	0.214635	0.00173209	9.53484e-05	0.00939316	0.00331649	0.00329499	1.38841e-06	0.00312451	1.05409
			GLO: preparation of phosphine [1% PH3 in H2] <Mfg>				0.000308884	0.000307727	5.56339e-07	0.000178802	4.52224e-06	2.41552e-06	9.38382e-07	1.1426e-05	0.000250799	3.49984e-05	7.61919e-06	3.19565e-06	1.45046e-08	1.02659e-05	6.89636e-07	6.71464e-07	1.20591e-10	1.04125e-06	0.000321572
				GLO: market for phosphane ecoinvent 3.5			0.000179919	0.000178291	4.59223e-07	7.92156e-05	2.01239e-06	1.85373e-06	9.15442e-07	8.71189e-06	0.0001945	2.59016e-05	6.70902e-06	2.43694e-06	1.18607e-08	1.01722e-05	4.84104e-07	4.79444e-07	8.50238e-11	7.63898e-07	0.000226128
				RER: market for hydrogen, liquid ecoinvent 3.5			0.000128965	0.000129436	9.71155e-08	9.95861e-05	2.50985e-06	5.61792e-07	2.29401e-08	2.71412e-06	5.62991e-05	9.09676e-06	9.10165e-07	7.58705e-07	2.64395e-09	9.36983e-08	2.05533e-07	1.9202e-07	3.55668e-11	2.77348e-07	9.54435e-05
			RER: preparation of nitrogen trifluoride, at plant <Mfg>				0.00778117	0.00781769	1.04196e-05	0.0036367	0.000126447	6.34765e-05	3.3601e-06	0.000231653	0.00688509	0.00180618	0.000366744	8.67826e-05	3.52781e-07	1.4553e-05	1.31574e-05	1.30253e-05	3.21793e-09	3.20256e-05	0.0124124
				DE: Tap water from groundwater ts			8.2527e-07	8.86922e-07	3.63763e-10	2.57799e-07	8.94706e-06	1.75179e-09	1.03056e-10	8.56222e-09	4.31463e-07	3.87792e-09	2.13347e-08	2.50922e-09	2.0797e-10	1.89491e-07	1.10574e-09	1.09531e-09	6.16748e-13	9.22981e-10	2.31108e-07
				EU-28: Electricity grid mix 1kV-60kV ts			0.00414741	0.00412665	1.85983e-06	0.00166865	3.69299e-05	3.05227e-07	1.10699e-08	1.60357e-06	9.57501e-05	0.000264497	0.000240041	9.71131e-07	9.54489e-08	5.39202e-06	4.77149e-06	4.74084e-06	1.32293e-09	5.93373e-06	0.0012186
				GLO: market for chemical factory, organics ecoinvent 3.5			1.46456e-05	1.35835e-05	4.93395e-08	4.91947e-06	1.41857e-07	9.00056e-07	2.6111e-08	3.05901e-06	0.000191209	1.58636e-06	1.62366e-06	1.32086e-06	1.60332e-09	5.52006e-07	4.5098e-08	4.41172e-08	7.97928e-12	1.11955e-07	0.000402733
				GLO: market group for transport, freight, lorry, unspecified ecoinvent 3.5			6.35103e-06	6.35072e-06	9.15849e-09	2.30772e-06	1.86407e-08	3.78964e-08	5.29147e-10	1.34028e-07	5.04279e-06	1.19593e-07	3.38799e-07	1.51612e-07	6.24228e-11	1.25118e-08	3.45318e-08	3.38574e-08	2.79406e-12	2.10522e-08	0.000148233
				RENAMER | water (tap water) -> water, cooling, unspecified natural origin <u-so>			0	0	0	0	-5.9563e-06	0	0	0	0	0	0	0	0	0	0	0	0	0	0
				RENAMER | water (tap water) -> water, unspecified natural origin <u-so>			0	0	0	0	-2.97815e-06	0	0	0	0	0	0	0	0	0	0	0	0	0	0
				RER: market for ammonia, liquid ecoinvent 3.5			0.000128438	0.000128289	1.36525e-07	5.81282e-05	3.6226e-06	3.77432e-07	1.16705e-08	1.4244e-06	6.81379e-05	2.90257e-06	6.89088e-07	1.10702e-06	2.7834e-09	2.4366e-07	1.52468e-07	1.47584e-07	5.14811e-11	3.42882e-07	0.000666077
				RER: market for fluorine, liquid ecoinvent 3.5			0.00346683	0.00352516	8.30146e-06	0.00189631	7.9336e-05	5.92445e-05	3.28646e-06	0.000214667	0.00629639	0.00153471	0.000123253	8.00213e-05	2.41708e-07	8.05964e-06	8.04039e-06	7.94706e-06	1.82284e-09	2.52881e-05	0.00992782
				RER: market group for heat, district or industrial, natural gas ecoinvent 3.5			9.84504e-07	9.84663e-07	1.8489e-10	3.93244e-07	3.83751e-10	6.29839e-10	1.42396e-11	3.40064e-09	4.05134e-08	4.88728e-09	6.27397e-10	2.51671e-09	1.15216e-12	2.75619e-10	7.02585e-10	6.76859e-10	2.4983e-13	5.47258e-10	7.77539e-08
				RER: market group for transport, freight train ecoinvent 3.5			1.35847e-05	1.36205e-05	2.88429e-08	5.21444e-06	1.12412e-07	1.19081e-07	6.08541e-09	1.24481e-06	1.44031e-05	2.24769e-06	7.33888e-07	1.76531e-07	4.42642e-10	8.30825e-08	1.05733e-07	1.04273e-07	6.4139e-12	7.23335e-08	3.95044e-05
				RER: preparation of nitrogen trifluoride, at plant <u-so>			0	0	3.01389e-08	0	8.93445e-06	0	0	0	0	0	0	0	0	0	0	0	0	2.46134e-07	0
				RoW: treatment of wastewater from wafer fabrication, capacity 1.1E10l/year ecoinvent 3.5			2.10148e-06	2.16784e-06	3.7805e-09	5.19412e-07	-2.66161e-06	2.48996e-06	1.80543e-08	9.50802e-06	0.000213681	1.05472e-07	4.20271e-08	3.0292e-06	1.05232e-08	2.03115e-08	5.9066e-09	5.80035e-09	2.6286e-12	7.93379e-09	9.09463e-06
			RER: preparation of silane (silicon tetrahydride) <Mfg>				0.0770099	0.07799	8.62264e-05	0.0325793	0.00113472	0.000399532	3.37375e-05	0.00222061	0.0482207	0.0152058	0.00282216	0.000572098	2.93197e-06	5.71769e-05	0.000123426	0.000120787	2.97559e-08	0.000226729	0.0480076
				DE: market for silicon tetrachloride ecoinvent 3.5			0.0015076	0.00158307	1.55563e-06	0.000571883	0.000342094	1.48704e-05	1.70408e-06	8.90747e-05	0.00193164	0.000266003	4.42861e-05	1.93204e-05	1.16423e-07	8.31797e-07	1.96651e-06	1.9288e-06	9.55028e-10	6.27887e-06	0.000748798
				EU-28: Electricity grid mix 1kV-60kV ts			0.011008	0.0109529	4.93636e-06	0.00442892	9.80191e-05	8.10132e-07	2.93818e-08	4.25619e-06	0.00025414	0.000702026	0.000637115	2.57757e-06	2.5334e-07	1.43115e-05	1.26645e-05	1.25831e-05	3.51132e-09	1.57493e-05	0.00323441
				GLO: market for silicone factory ecoinvent 3.5			1.56926e-05	1.41605e-05	3.44198e-08	4.51732e-06	1.42315e-07	3.48781e-07	8.10409e-09	2.1903e-06	4.49683e-05	7.83473e-07	4.74209e-06	5.15034e-07	1.20102e-09	3.1001e-07	5.59599e-08	5.42105e-08	5.61396e-12	9.2492e-08	0.000122843
				GLO: market group for transport, freight, lorry, unspecified ecoinvent 3.5			0.000117016	0.00011701	1.68743e-07	4.25192e-05	3.4345e-07	6.98231e-07	9.74941e-09	2.46943e-06	9.29122e-05	2.20348e-06	6.24229e-06	2.79341e-06	1.15012e-09	2.30527e-07	6.3624e-07	6.23814e-07	5.14798e-11	3.87881e-07	0.00273116
				RER: market for hydrogen, liquid ecoinvent 3.5			0.000213562	0.000214341	1.6082e-07	0.000164911	4.15623e-06	9.3031e-07	3.79881e-08	4.49449e-06	9.32296e-05	1.50639e-05	1.5072e-06	1.25639e-06	4.3783e-09	1.55161e-07	3.40355e-07	3.17979e-07	5.88975e-11	4.59279e-07	0.000158051
				RER: market for lime, hydrated, packed ecoinvent 3.5			0.000499094	0.000502017	1.41538e-07	5.02938e-05	6.93519e-07	3.33882e-07	7.1163e-09	1.09313e-06	2.82763e-05	9.26379e-06	8.37254e-06	6.2434e-07	1.09226e-09	7.5491e-08	3.14701e-07	3.06338e-07	5.0428e-11	3.99731e-07	0.000225531
				RER: market for nitrogen, liquid ecoinvent 3.5			0.001755	0.00179533	3.00911e-06	0.000938682	8.67148e-05	2.86818e-05	1.78598e-06	0.000107484	0.00241811	0.000909489	6.18383e-05	3.67863e-05	1.32612e-07	1.2893e-06	3.50561e-06	3.47377e-06	9.58181e-10	9.06326e-06	0.00205616
				RER: market group for heat, district or industrial, natural gas ecoinvent 3.5			0.011493	0.0114949	2.15839e-06	0.00459069	4.47987e-06	7.35269e-06	1.66231e-07	3.96988e-05	0.00047295	5.70537e-05	7.32418e-06	2.93798e-05	1.34502e-08	3.21755e-06	8.20192e-06	7.9016e-06	2.91649e-09	6.38864e-06	0.000907692
				RER: market group for transport, freight train ecoinvent 3.5			0.000250188	0.000250847	5.31198e-07	9.6034e-05	2.07028e-06	2.19312e-06	1.12075e-07	2.29256e-05	0.000265262	4.13957e-05	1.3516e-05	3.25116e-06	8.15211e-09	1.53013e-06	1.94728e-06	1.9204e-06	1.18124e-10	1.33216e-06	0.000727551
				RER: preparation of silane (silicon tetrahydride) <u-so>			0	0	0	0	0	1.69519e-07	2.13456e-09	2.10167e-08	1.86837e-05	0	0	2.03913e-07	9.68708e-08	0	0	0	0	0	4.07106e-23
				RER: silicon production, solar grade, modified Siemens process ecoinvent 3.5			0.0501507	0.0510654	7.35302e-05	0.0216908	0.000596009	0.000343144	2.98747e-05	0.0019469	0.0426006	0.0132026	0.00203721	0.000475389	2.3033e-06	3.52255e-05	9.37925e-05	9.16769e-05	2.11303e-08	0.000186578	0.0370954
			DE: Argon (liquid) ts				0.000851334	0.000846629	2.47178e-07	0.000246513	3.3585e-06	5.32945e-08	3.49567e-09	2.64528e-07	1.98563e-05	1.37233e-05	6.60056e-05	1.79494e-07	2.63245e-08	1.57683e-06	8.91564e-07	8.87069e-07	4.17971e-10	7.90666e-07	0.000277354
			DE: Electricity grid mix 1kV-60kV ts				2.38424	2.37102	0.000692192	0.690379	0.00916823	0.000149025	9.77669e-06	0.00073972	0.0555506	0.0384354	0.184864	0.000502358	7.36981e-05	0.00441043	0.00249668	0.00248409	1.17055e-06	0.00221419	0.776752
			DE: Tap water from groundwater ts				0.0714304	0.0767666	3.14851e-05	0.0223135	0.774404	0.000151624	8.91988e-06	0.000741094	0.0373449	0.00033565	0.00184661	0.000217183	1.80006e-05	0.0164012	9.57065e-05	9.48037e-05	5.3382e-08	7.98876e-05	0.0200033
			DE: Tap water from groundwater ts				-0.0535728	-0.0575749	-2.36139e-05	-0.0167351	-0.580803	-0.000113718	-6.68991e-06	-0.000555821	-0.0280086	-0.000251737	-0.00138495	-0.000162887	-1.35004e-05	-0.0123009	-7.17799e-05	-7.11028e-05	-4.00365e-08	-5.99157e-05	-0.0150025
			EU-28: Compressed air ts				0.0802143	0.0798136	3.60976e-05	0.0323385	0.0007185	5.90796e-06	2.12881e-07	3.10562e-05	0.00185255	0.00514108	0.00462138	1.88016e-05	1.83842e-06	0.000103922	9.24133e-05	9.18192e-05	2.55065e-08	0.000115166	0.0235605
			GLO: market for diborane ecoinvent 3.5				0.0247233	0.0246137	6.30689e-05	0.0102312	0.000387171	0.000280618	1.29539e-05	0.00107842	0.0408131	0.00233165	0.000436759	0.000399223	9.32304e-07	0.000191105	6.66516e-05	6.56616e-05	1.24425e-08	0.000128977	0.0812295
			NL: Nitrogen (liquid) ts				0.596994	0.593114	0.000126441	0.182323	0.00167377	2.32011e-05	1.25929e-06	0.000192762	0.00809923	0.00585406	0.0209734	8.2381e-05	1.10092e-05	0.000502265	0.000495194	0.000491117	1.32451e-07	0.000380951	0.104918
			RER: market for hydrogen, liquid ecoinvent 3.5				0.00217113	0.00217905	1.63494e-06	0.00167653	4.22533e-05	9.45778e-06	3.86197e-07	4.56922e-05	0.000947797	0.000153144	1.53226e-05	1.27728e-05	4.4511e-08	1.57741e-06	3.46015e-06	3.23267e-06	5.98768e-10	4.66915e-06	0.00160679
		DE: B.03 - sputter FS: ITO (indium-tin-oxide) [HJT] -rev5- (001) <Mfg>					0.515282	0.512984	0.000272463	0.152168	0.0338881	0.00149662	5.33376e-05	0.0033909	0.495569	0.012328	0.0370197	0.00389874	1.80867e-05	0.00481623	0.000676395	0.000667445	2.58327e-07	0.000786952	2.73341
			DE: Argon (liquid) ts				0.000301571	0.000299904	8.75586e-08	8.73232e-05	1.18969e-06	1.88787e-08	1.23828e-09	9.37046e-08	7.03376e-06	4.86125e-06	2.33814e-05	6.35826e-08	9.32502e-09	5.58567e-07	3.15821e-07	3.14229e-07	1.48059e-10	2.8008e-07	9.82481e-05
			DE: Electricity grid mix 1kV-60kV ts				0.440734	0.43829	0.000127954	0.127619	0.00169478	2.75477e-05	1.80725e-06	0.00013674	0.0102687	0.00710492	0.0341727	9.28625e-05	1.36233e-05	0.000815283	0.000461519	0.000459193	2.16381e-07	0.0004093	0.143585
			DE: Nitrogen (liquid) ts				0.0194666	0.0193593	5.65227e-06	0.00563681	7.80964e-05	1.2199e-06	8.00046e-08	6.05482e-06	0.000454357	0.000313786	0.00150924	4.10612e-06	6.02081e-07	3.60868e-05	2.03878e-05	2.0285e-05	9.55739e-09	1.80802e-05	0.00634202
			DE: Oxygen (liquid) ts				3.09316e-06	3.07606e-06	8.98073e-10	8.95659e-07	1.22028e-08	1.93636e-10	1.27008e-11	9.61113e-10	7.21441e-08	4.9861e-08	2.39819e-07	6.52156e-10	9.56452e-11	5.72913e-09	3.23932e-09	3.22299e-09	1.51862e-12	2.87273e-09	1.00771e-06
			DE: Tap water from groundwater ts				0.0116282	0.0124969	5.12549e-06	0.00363243	0.126066	2.4683e-05	1.45207e-06	0.000120643	0.0060794	5.46406e-05	0.00030061	3.53553e-05	2.93033e-06	0.00266996	1.55801e-05	1.54332e-05	8.69009e-09	1.3005e-05	0.00325635
			DE: Tap water from groundwater ts				-0.00872115	-0.00937266	-3.84412e-06	-0.00272433	-0.0945493	-1.85122e-05	-1.08905e-06	-9.04824e-05	-0.00455955	-4.09805e-05	-0.000225458	-2.65165e-05	-2.19775e-06	-0.00200247	-1.16851e-05	-1.15749e-05	-6.51757e-09	-9.75372e-06	-0.00244226
			EU-28: Compressed air ts				0.00445635	0.00443409	2.00542e-06	0.00179658	3.99166e-05	3.2822e-07	1.18267e-08	1.72534e-06	0.000102919	0.000285616	0.000256743	1.04453e-06	1.02134e-07	5.77343e-06	5.13407e-06	5.10106e-06	1.41703e-09	6.39813e-06	0.00130892
			RER: market for indium tin oxide powder, nanoscale, for sputtering target ecoinvent 3.5				0.0474132	0.0474733	0.000135482	0.0161198	0.000557663	0.00146134	5.10743e-05	0.00321612	0.483216	0.00460508	0.000982241	0.00379183	3.01715e-06	0.00329104	0.00018514	0.000178691	2.86498e-08	0.000349639	2.58126
		DE: B.04 - sputter RS: ITO (indium-tin-oxide) -rev4- (001) <Mfg>					4.55087	4.52832	0.00145442	1.32587	0.333159	0.00180321	7.29876e-05	0.00490937	0.602656	0.0790094	0.347772	0.00482403	0.000148293	0.0182182	0.00491417	0.00488364	2.23939e-06	0.00456002	4.04566
			DE: Argon (liquid) ts				0.00301571	0.00299904	8.75586e-07	0.000873232	1.18969e-05	1.88787e-07	1.23828e-08	9.37046e-07	7.03376e-05	4.86125e-05	0.000233814	6.35826e-07	9.32502e-08	5.58567e-06	3.15821e-06	3.14229e-06	1.48059e-09	2.8008e-06	0.000982481
			DE: Electricity grid mix 1kV-60kV ts				4.40734	4.3829	0.00127954	1.27619	0.0169478	0.000275477	1.80725e-05	0.0013674	0.102687	0.0710492	0.341727	0.000928625	0.000136233	0.00815283	0.00461519	0.00459193	2.16381e-06	0.004093	1.43585
			DE: Nitrogen (liquid) ts				0.0194666	0.0193593	5.65227e-06	0.00563681	7.80964e-05	1.2199e-06	8.00046e-08	6.05482e-06	0.000454357	0.000313786	0.00150924	4.10612e-06	6.02081e-07	3.60868e-05	2.03878e-05	2.0285e-05	9.55739e-09	1.80802e-05	0.00634202
			DE: Oxygen (liquid) ts				3.09316e-06	3.07606e-06	8.98073e-10	8.95659e-07	1.22028e-08	1.93636e-10	1.27008e-11	9.61113e-10	7.21441e-08	4.9861e-08	2.39819e-07	6.52156e-10	9.56452e-11	5.72913e-09	3.23932e-09	3.22299e-09	1.51862e-12	2.87273e-09	1.00771e-06
			DE: Tap water from groundwater ts				0.116282	0.124969	5.12549e-05	0.0363243	1.26066	0.00024683	1.45207e-05	0.00120643	0.060794	0.000546406	0.0030061	0.000353553	2.93033e-05	0.0266996	0.000155801	0.000154332	8.69009e-08	0.00013005	0.0325635
			DE: Tap water from groundwater ts				-0.0872115	-0.0937266	-3.84412e-05	-0.0272433	-0.945493	-0.000185122	-1.08905e-05	-0.000904824	-0.0455955	-0.000409805	-0.00225458	-0.000265165	-2.19775e-05	-0.0200247	-0.000116851	-0.000115749	-6.51757e-08	-9.75372e-05	-0.0244226
			EU-28: Compressed air ts				0.0445635	0.0443409	2.00542e-05	0.0179658	0.000399166	3.2822e-06	1.18267e-07	1.72534e-05	0.00102919	0.00285616	0.00256743	1.04453e-05	1.02134e-06	5.77343e-05	5.13407e-05	5.10106e-05	1.41703e-08	6.39813e-05	0.0130892
			RER: market for indium tin oxide powder, nanoscale, for sputtering target ecoinvent 3.5				0.0474132	0.0474733	0.000135482	0.0161198	0.000557663	0.00146134	5.10743e-05	0.00321612	0.483216	0.00460508	0.000982241	0.00379183	3.01715e-06	0.00329104	0.00018514	0.000178691	2.86498e-08	0.000349639	2.58126
		DE: B.10 - contact formation/ metallization (Ag-fingers) [HJT] -rev5- (001) <Mfg>					4.71268	4.65693	0.0117069	1.5354	0.026806	0.356686	0.0131104	0.840833	102	0.298967	0.373331	1.65432	0.000345033	0.562436	0.0265395	0.026126	4.65961e-06	0.0239165	34.629
			DE: manufacturing of printing screens (application of ag-fingers) <Mfg>				0.744944	0.747093	0.00262724	0.239121	0.00478127	0.0309767	0.000294389	0.259091	1.21985	0.0358867	0.0227328	0.0524767	2.19651e-05	0.0724154	0.00210918	0.00204855	2.24108e-07	0.00314717	24.7319
				DE: Aluminium frame profile, powder coated (EN15804 A1-A3) ts			0.0298641	0.0298964	2.24697e-05	0.00938576	0.000222065	5.21856e-06	1.06435e-07	2.28031e-05	0.00128871	0.000735964	0.00058844	1.34988e-05	5.874e-07	0.000150165	4.47393e-05	4.44265e-05	6.38446e-09	7.00831e-05	0.00740922
				RER: market for adhesive, for metal ecoinvent 3.5			0.0206953	0.0206236	2.88019e-05	0.00959142	0.000238604	0.000502491	7.46344e-06	0.000741543	0.0256807	0.0013244	0.000366345	0.000263393	5.58388e-07	5.74916e-05	4.50825e-05	4.16738e-05	6.10104e-09	6.04643e-05	0.0603141
				RER: steel production, chromium steel 18/8, hot rolled ecoinvent 3.5			0.694384	0.696573	0.00257597	0.220144	0.0043206	0.030469	0.000286819	0.258326	1.19288	0.0338264	0.021778	0.0521998	2.08193e-05	0.0722077	0.00201936	0.00196245	2.11623e-07	0.00301662	24.6641
			RER: preparation of Ag-paste (95% Ag, 5% unknown solvent) <Mfg>				2.62626	2.57569	0.00868826	0.891719	0.0161456	0.32405	0.0128285	0.582055	100.91	0.234807	0.249328	1.59984	0.00028387	0.487881	0.0230111	0.0226656	3.80246e-06	0.0195142	9.81433
				EU-28: Electricity grid mix 1kV-60kV ts			0.000797312	0.000793321	3.5754e-07	0.000320786	7.09952e-06	5.86778e-08	2.12812e-09	3.08275e-07	1.84073e-05	5.08477e-05	4.61462e-05	1.86693e-07	1.83494e-08	1.03658e-06	9.17287e-07	9.11395e-07	2.54324e-10	1.14072e-06	0.000234268
				GLO: market for chemical, organic ecoinvent 3.5			0.000398712	0.000397966	5.28526e-07	0.00029183	8.1144e-06	2.11798e-06	9.02401e-08	1.05037e-05	0.000272564	1.13653e-05	3.38098e-06	3.07415e-06	7.915e-09	5.59968e-07	1.00337e-06	8.88352e-07	8.30746e-11	1.20503e-06	0.000666589
				GLO: market for silver ecoinvent 3.5			2.62023	2.56966	0.00865529	0.889366	0.0160701	0.324005	0.0128264	0.581672	100.905	0.234204	0.249033	1.59978	0.000283694	0.486668	0.0229774	0.0226326	3.79702e-06	0.0194277	9.8051
				GLO: market for solder factory ecoinvent 3.5			3.97385e-07	3.41092e-07	7.92874e-10	1.03059e-07	3.28271e-09	6.96415e-09	1.14597e-10	3.71089e-08	5.77805e-07	1.08302e-08	1.95668e-07	1.02398e-08	3.39336e-11	6.08693e-09	1.3176e-09	1.27196e-09	1.1717e-13	2.49801e-09	2.34051e-06
				GLO: market for tin ecoinvent 3.5			0.00427777	0.00428174	3.17049e-05	0.00152623	5.9343e-05	4.08454e-05	1.97193e-06	0.00036576	0.00475538	0.000532181	0.000234282	5.3826e-05	1.47529e-07	0.00121106	3.02613e-05	2.97945e-05	4.91439e-09	8.32743e-05	0.00393648
				RER: market for transport, freight, inland waterways, barge ecoinvent 3.5			8.12422e-06	8.15787e-06	1.64889e-08	2.6182e-06	3.39241e-08	2.52554e-08	1.08821e-09	2.62591e-07	2.80748e-06	3.9209e-07	3.79261e-07	4.08655e-08	1.08533e-10	2.85297e-08	9.36871e-08	9.28136e-08	8.23848e-12	4.57942e-08	1.12987e-05
				RER: market for transport, freight, lorry, unspecified ecoinvent 3.5			0.000183725	0.000183725	2.63457e-07	6.69007e-05	5.46976e-07	1.10137e-06	1.54589e-08	3.89762e-06	0.000146364	3.73022e-06	9.8675e-06	4.40462e-06	1.81999e-09	3.64181e-07	1.00091e-06	9.81336e-07	8.10225e-11	6.08107e-07	0.00430574
				RER: market group for heat, district or industrial, natural gas ecoinvent 3.5			0.000346555	0.00034661	6.5083e-08	0.000138425	1.35084e-07	2.21709e-07	5.01246e-09	1.19706e-06	1.42611e-05	1.72037e-06	2.2085e-07	8.85904e-07	4.0557e-10	9.70205e-08	2.47316e-07	2.38261e-07	8.79425e-11	1.9264e-07	2.73701e-05
				RER: market group for transport, freight train ecoinvent 3.5			1.68158e-05	1.68601e-05	3.57032e-08	6.45469e-06	1.39149e-07	1.47405e-07	7.53282e-09	1.54089e-06	1.78289e-05	2.78231e-06	9.08442e-07	2.18518e-07	5.47923e-10	1.02844e-07	1.30882e-07	1.29075e-07	7.93944e-12	8.9538e-08	4.89005e-05
			DE: Electricity grid mix 1kV-60kV ts				1.20214	1.19547	0.000349004	0.34809	0.00462264	7.51384e-05	4.92942e-06	0.000372968	0.0280087	0.0193792	0.0932088	0.00025329	3.71587e-05	0.00222375	0.00125883	0.00125248	5.90195e-07	0.0011164	0.39164
			EU-28: Compressed air ts				0.13889	0.138196	6.25024e-05	0.0559935	0.00124407	1.02295e-05	3.68599e-07	5.37732e-05	0.00320766	0.00890169	0.00800183	3.25545e-05	3.18319e-06	0.000179939	0.000160012	0.000158983	4.4164e-08	0.000199408	0.0407946
			Europe without Switzerland: market for scrap steel ecoinvent 3.5				0.00121007	0.00121108	2.67121e-06	0.000703354	2.55962e-05	0.00201964	1.62283e-07	0.000109288	0.00240422	4.32224e-05	0.000133495	0.00242118	1.56143e-08	2.81277e-06	9.25711e-06	9.072e-06	7.54345e-10	6.04295e-06	0.0112565
			GLO: market for anode slime, silver and tellurium containing stockpiling ecoinvent 3.5				-0.000878493	-0.000858472	-2.30265e-05	-0.000269941	-1.44341e-05	-0.00045147	-1.80477e-05	-0.000853744	-0.164062	-5.79882e-05	-8.4313e-05	-0.000713468	-1.16351e-06	-0.000266949	-9.34848e-06	-9.17722e-06	-2.11416e-09	-6.72271e-05	-0.361207
			GLO: market for waste aluminium ecoinvent 3.5				0.000122992	0.000123861	2.57393e-07	4.77475e-05	1.2926e-06	5.34506e-06	4.06782e-08	4.87938e-06	0.00068669	7.21251e-06	1.03255e-05	6.6907e-06	3.16693e-09	2.05077e-07	5.24618e-07	5.15437e-07	4.91153e-11	5.36577e-07	0.000351706
		DE: B.11 - curing (module) [HJT] -rev5- (001) <Mfg>					0.469132	0.466624	0.000163123	0.154993	0.00266584	3.12023e-05	1.6798e-06	0.000158517	0.010896	0.0156506	0.0330157	0.000102841	1.31538e-05	0.000774365	0.000508946	0.000506111	2.0116e-07	0.000521162	0.147431
			DE: Electricity grid mix 1kV-60kV ts				0.300534	0.298868	8.72511e-05	0.0870225	0.00115566	1.87846e-05	1.23236e-06	9.3242e-05	0.00700217	0.0048448	0.0233022	6.33224e-05	9.28968e-06	0.000555937	0.000314707	0.000313121	1.47549e-07	0.0002791	0.0979099
			EU-28: Compressed air ts				0.168599	0.167756	7.58719e-05	0.0679707	0.00151018	1.24177e-05	4.47443e-07	6.52755e-05	0.00389379	0.0108058	0.00971345	3.95181e-05	3.86408e-06	0.000218428	0.000194239	0.00019299	5.36108e-08	0.000242062	0.0495207
		DE: B.12 - test [HJT] -rev5- (001) <Mfg>					0.347954	0.346026	0.000101392	0.101019	0.00134996	2.17746e-05	1.42342e-06	0.000108134	0.00810653	0.00572147	0.0269323	7.33692e-05	1.07368e-05	0.000642359	0.000364609	0.000362767	1.70425e-07	0.000324324	0.113284
			DE: Electricity grid mix 1kV-60kV ts				0.345614	0.343698	0.000100339	0.100076	0.00132901	2.16023e-05	1.41721e-06	0.000107228	0.0080525	0.00557152	0.0267975	7.28208e-05	1.06831e-05	0.000639328	0.000361913	0.000360089	1.69681e-07	0.000320965	0.112596
			EU-28: Compressed air ts				0.00233958	0.0023279	1.05285e-06	0.000943206	2.09562e-05	1.72316e-07	6.20902e-09	9.05806e-07	5.40327e-05	0.000149948	0.00013479	5.48379e-07	5.36205e-08	3.03105e-06	2.69539e-06	2.67806e-06	7.43939e-10	3.35902e-06	0.000687182
		DE: external waste water treatment [drain acid - X.02] -rev4- (001) <LC>					0.00210808	0.00211696	2.89328e-06	0.000714804	-0.000153398	1.36198e-05	2.61797e-06	5.38353e-05	0.00175052	9.12682e-05	0.000101048	4.72786e-05	7.13919e-06	5.32479e-06	1.04033e-05	1.02015e-05	1.73902e-09	6.83509e-06	0.0432461
			CH: treatment of wastewater from PV cell production, capacity 5E9l/year ecoinvent 3.5				0.000290804	0.000299774	2.72679e-07	5.44754e-05	-0.000158732	2.7762e-06	2.46656e-06	1.54848e-05	0.000307581	5.70479e-05	4.10411e-06	3.89656e-06	7.12133e-06	1.74467e-06	5.22407e-07	5.13588e-07	9.39535e-10	8.11243e-07	0.00083075
			GLO: market group for transport, freight, lorry, unspecified ecoinvent 3.5				0.00181728	0.00181719	2.6206e-06	0.000660329	5.33382e-06	1.08436e-05	1.5141e-07	3.83506e-05	0.00144294	3.42203e-05	9.69437e-05	4.33821e-05	1.78616e-08	3.58012e-06	9.8809e-06	9.68792e-06	7.99489e-10	6.02385e-06	0.0424153
		DE: X.01 - exhaust abatement [HJT - defaul] -rev5- (001) <Mfg>					0.610153	0.609498	0.00029034	0.145384	0.0152433	2.03304e-05	7.15942e-07	9.28008e-05	0.00502317	0.00678891	0.0103464	5.78293e-05	4.46324e-06	0.000595776	0.00217348	0.00217126	6.78348e-08	0.000943433	0.0639643
			DE: X.03 - ultrapure water system -rev4- (001) <Mfg>				0.0172466	0.0172574	5.39945e-06	0.00502653	0.0142435	6.40042e-06	2.64047e-07	4.07383e-05	0.00125529	0.000269272	0.00125984	1.15308e-05	8.24031e-07	0.000333844	1.85493e-05	1.84391e-05	1.12846e-08	1.65706e-05	0.0070761
				CH: ion-exchanger production for water treatment ecoinvent 3.5			0.000170938	0.000171421	2.4518e-07	5.22246e-05	1.63687e-06	2.63827e-06	3.6044e-08	2.22751e-05	0.000204046	8.92709e-06	3.47576e-06	4.23145e-06	7.0115e-09	4.33056e-06	2.85485e-07	2.7501e-07	2.5659e-09	4.64416e-07	0.00157293
				DE: Electricity grid mix 1kV-60kV ts			0.0157673	0.0156799	4.57757e-06	0.00456558	6.06309e-05	9.85521e-07	6.46547e-08	4.89188e-06	0.000367364	0.000254179	0.00122253	3.32217e-06	4.87377e-07	2.91669e-05	1.65109e-05	1.64277e-05	7.74105e-09	1.46428e-05	0.00513677
				DE: Tap water from groundwater ts			0.00130807	0.00140579	5.76571e-07	0.000408616	0.0141813	2.77661e-06	1.63345e-07	1.35713e-05	0.000683877	6.14658e-06	3.38159e-05	3.97715e-06	3.29636e-07	0.000300346	1.75262e-06	1.73609e-06	9.77557e-10	1.46294e-06	0.00036631
				DE: X.03 - ultra pure water system -rev4- (001) ecoinvent 3.5 <u-so>			6.74864e-12	6.74864e-12	0	0	-4.11699e-14	0	2.4042e-12	0	0	0	0	0	3.50139e-13	0	0	0	0	0	0
				EU-28: Compressed air ts			2.92249e-07	2.90789e-07	1.31517e-10	1.17821e-07	2.61775e-09	2.15248e-11	7.75599e-13	1.13149e-10	6.7495e-09	1.87308e-08	1.68373e-08	6.85008e-11	6.69801e-12	3.78624e-10	3.36694e-10	3.3453e-10	9.29291e-14	4.19592e-10	8.58394e-08
			DE: Electricity grid mix 1kV-60kV ts				0.0500218	0.0497445	1.45223e-05	0.0144843	0.000192352	3.12657e-06	2.05117e-07	1.55195e-05	0.00116546	0.000806384	0.00387849	1.05396e-05	1.5462e-06	9.25318e-05	5.23808e-05	5.21168e-05	2.45585e-08	4.64542e-05	0.0162964
			DE: emission, direct [default] -rev4- [X.01] <u-so>				0.417576	0.417576	0.000215141	0	0	0	0	0	0	0	0	0	0	0	0.00195583	0.00195583	0	0.000704098	0
			DE: Natural gas mix ts				0.0363013	0.0363577	1.5222e-05	0.0899901	1.01934e-05	4.2478e-06	1.05617e-08	2.0824e-06	0.000546781	8.60516e-06	8.0079e-05	1.48963e-05	5.30656e-08	5.40863e-05	4.41819e-05	4.29905e-05	3.68925e-09	4.85194e-05	0.0144486
			EU-28: Compressed air ts				0.0890074	0.0885628	4.00547e-05	0.0358835	0.000797262	6.5556e-06	2.36217e-07	3.44606e-05	0.00205563	0.00570465	0.00512798	2.08626e-05	2.03995e-06	0.000115314	0.000102544	0.000101884	2.83025e-08	0.000127791	0.0261432
		DE: X.02 - tray cleaning -rev5- (001) <Mfg>					0.35521	0.353417	0.000242272	0.119594	0.00158857	3.72634e-05	1.5183e-06	0.000136793	0.0137209	0.00508998	0.0240879	0.000125301	9.99345e-06	0.0034658	0.000450735	0.000447581	1.61689e-07	0.00078626	0.132545
			DE: preparation of phosphoric acid (85% H3PO4) <Mfg>				0.0546497	0.0545201	0.00015501	0.0325629	0.000144764	1.84223e-05	2.82628e-07	4.32754e-05	0.0067048	0.000245051	0.000784995	6.1898e-05	6.97074e-07	0.00290376	0.000135993	0.000134425	1.41209e-08	0.00050713	0.0346274
				DE: Phosphoric acid (100%) (wet process) ts			0.0545289	0.0543994	0.000154798	0.0325208	0.00014162	1.76289e-05	1.82661e-07	3.7927e-05	0.00660736	0.000241146	0.000779047	5.96095e-05	6.83696e-07	0.00290336	0.00013518	0.000133625	1.40654e-08	0.00050665	0.03278
				GLO: market for water, ultrapure ecoinvent 3.5			0.000120797	0.000120697	2.11474e-07	4.203e-05	3.14436e-06	7.93416e-07	9.99666e-08	5.3484e-06	9.74434e-05	3.90412e-06	5.9479e-06	2.28845e-06	1.33781e-08	4.07066e-07	8.12446e-07	7.99275e-07	5.54573e-11	4.80352e-07	0.00184737
			DE: Electricity grid mix 1kV-60kV ts				0.300534	0.298868	8.72511e-05	0.0870225	0.00115566	1.87846e-05	1.23236e-06	9.3242e-05	0.00700217	0.0048448	0.0233022	6.33224e-05	9.28968e-06	0.000555937	0.000314707	0.000313121	1.47549e-07	0.0002791	0.0979099
			DE: Tap water from groundwater ts				2.65787e-05	2.85643e-05	1.17154e-08	8.30271e-06	0.00028815	5.64182e-08	3.31902e-09	2.75756e-07	1.38958e-05	1.24893e-07	6.87109e-07	8.08122e-08	6.69789e-09	6.10276e-06	3.56117e-08	3.52758e-08	1.98631e-11	2.97256e-08	7.44309e-06
		DE: X.04 - inhouse waste water treatment [HJT] -rev5- (001) <LC>					0.667921	0.664048	0.000468496	0.196445	-0.0325407	0.00213502	8.386e-05	0.0247319	0.395953	0.0258318	0.043584	0.00360058	2.23761e-05	0.00240722	0.000993647	0.000985438	3.23066e-07	0.00142687	2.96858
			DE: [BLOCK] X.04 - inhouse waste water treatment -rev4- (001) <LC>				0.00308402	0.00306598	2.27757e-06	0.000887283	-0.000218939	1.10182e-05	4.32013e-07	0.00012799	0.00207135	0.000126319	0.000192698	1.89044e-05	1.0166e-07	1.08723e-05	4.78441e-06	4.74435e-06	1.48746e-09	6.90711e-06	0.017345
				DE: preparation of hydrogen chloride (36% in H2O) <Mfg>			5.81585e-05	5.81633e-05	3.30229e-08	2.678e-05	3.74781e-07	7.76227e-08	8.87348e-09	4.92525e-07	1.26224e-05	5.97405e-07	1.77117e-06	2.30937e-07	2.2029e-09	1.94588e-07	1.32198e-07	1.2923e-07	2.69481e-11	8.63973e-08	0.000224641
					DE: Hydrochloric acid mix (100%) ts		4.76747e-05	4.76881e-05	1.46693e-08	2.31322e-05	1.01886e-07	8.76321e-09	1.97511e-10	2.83439e-08	4.16545e-06	2.58572e-07	1.25496e-06	3.23257e-08	1.04183e-09	1.59259e-07	6.16865e-08	5.98619e-08	2.2135e-11	4.47082e-08	6.431e-05
					GLO: market for water, ultrapure ecoinvent 3.5		1.04838e-05	1.04752e-05	1.83535e-08	3.64773e-06	2.72895e-07	6.88595e-08	8.67597e-09	4.64181e-07	8.45699e-06	3.38833e-07	5.16211e-07	1.98611e-07	1.16107e-09	3.53287e-08	7.05112e-08	6.93681e-08	4.81306e-12	4.16891e-08	0.000160331
				DE: Electricity grid mix 1kV-60kV ts			0.00176655	0.00175676	5.12865e-07	0.000511521	6.79301e-06	1.10417e-07	7.24383e-09	5.4808e-07	4.1159e-05	2.84779e-05	0.000136971	3.72212e-07	5.46051e-08	3.26782e-06	1.84986e-06	1.84054e-06	8.67297e-10	1.64056e-06	0.000575518
				DE: Sludge (acid/basic) ts			0.000373065	0.000372947	8.13887e-08	1.70084e-05	1.19491e-07	1.08767e-08	6.12869e-11	5.43948e-07	0.00020257	1.85299e-07	9.4851e-07	2.19209e-06	8.01333e-10	1.33633e-06	5.8961e-07	5.88597e-07	1.66537e-10	2.60499e-07	0.0124088
				DE: Sodium hydroxide mix (50%) ts			0.000343879	0.000342765	1.49691e-07	0.00010634	1.49291e-06	2.70805e-08	1.46394e-09	1.23855e-07	9.76498e-06	4.10076e-06	2.01072e-05	7.76955e-08	1.10814e-08	1.02468e-06	6.05566e-07	6.00441e-07	1.39126e-10	4.43369e-07	9.2071e-05
				DE: Tap water from groundwater ts			-2.2525e-05	-2.42077e-05	-9.92859e-09	-7.03639e-06	-0.000244202	-4.78134e-08	-2.81281e-09	-2.33698e-07	-1.17764e-05	-1.05844e-07	-5.82312e-07	-6.84868e-08	-5.67634e-09	-5.17197e-06	-3.01803e-08	-2.98956e-08	-1.68336e-11	-2.51919e-08	-6.30788e-06
				EU-28: Compressed air ts			6.29446e-05	6.26302e-05	2.8326e-08	2.53762e-05	5.6381e-07	4.63601e-09	1.67048e-10	2.437e-08	1.45371e-06	4.03423e-06	3.62642e-06	1.47537e-08	1.44262e-09	8.15479e-08	7.25171e-08	7.20509e-08	2.00151e-11	9.03716e-08	1.84881e-05
				GLO: market for iron(III) chloride, without water, in 14% iron solution state ecoinvent 3.5			0.000165675	0.000163824	3.9891e-07	6.61725e-05	3.26901e-06	3.86125e-06	1.52201e-07	1.43007e-05	0.000651305	3.53141e-05	7.62497e-06	5.58309e-06	1.19276e-08	1.63614e-06	5.07022e-07	5.00302e-07	1.4032e-10	8.94802e-07	0.00146676
				RER: market for aluminium sulfate, powder ecoinvent 3.5			0.000201438	0.000201239	7.17314e-07	9.8163e-05	5.98535e-06	4.61607e-06	1.66708e-07	0.000102974	0.000705339	4.39717e-05	7.27366e-06	6.9516e-06	1.03341e-08	7.33173e-06	6.81995e-07	6.72812e-07	9.20916e-11	2.16165e-06	0.00145779
				RER: market for calcium chloride ecoinvent 3.5			0.000134841	0.000131858	3.65979e-07	4.29582e-05	6.66493e-06	2.3581e-06	9.81065e-08	9.21582e-06	0.00045891	9.74313e-06	1.49575e-05	3.55051e-06	1.49414e-08	1.17145e-06	3.75825e-07	3.70275e-07	5.19576e-11	1.35466e-06	0.00110725
			DE: preparation of hydrogen chloride (36% in H2O) <Mfg>				0.01117	0.0111709	6.34241e-06	0.00514339	7.19808e-05	1.49083e-05	1.70425e-06	9.45949e-05	0.00242428	0.000114738	0.000340173	4.4354e-05	4.23092e-07	3.73727e-05	2.539e-05	2.482e-05	5.17567e-09	1.65936e-05	0.0431447
				DE: Hydrochloric acid mix (100%) ts			0.00915645	0.00915903	2.81741e-06	0.0044428	1.95684e-05	1.68307e-06	3.79341e-08	5.44376e-06	0.000800021	4.96616e-05	0.000241029	6.2085e-06	2.00096e-07	3.05875e-05	1.18476e-05	1.14971e-05	4.25127e-09	8.5867e-06	0.0123514
				GLO: market for water, ultrapure ecoinvent 3.5			0.00201353	0.00201187	3.525e-06	0.000700586	5.24124e-05	1.32252e-05	1.66632e-06	8.91511e-05	0.00162426	6.50767e-05	9.91439e-05	3.81455e-05	2.22996e-07	6.78526e-06	1.35424e-05	1.33229e-05	9.24402e-10	8.00685e-06	0.0307933
			DE: X.07 - acidic exhaust air washer -rev5- (001) <Mfg>				3.17327e-10	3.15972e-10	1.00969e-13	9.30308e-11	3.86203e-11	3.474e-14	1.81929e-15	1.94427e-13	9.91784e-12	4.86646e-12	2.33735e-11	8.84991e-14	1.06465e-14	1.44382e-12	3.72028e-13	3.69784e-13	1.58568e-16	3.15579e-13	1.04096e-10
				DE: X.03 - ultrapure water system -rev4- (001) <Mfg>			4.54647e-11	4.54932e-11	1.42338e-14	1.32507e-11	3.75481e-11	1.68725e-14	6.96069e-16	1.07393e-13	3.30915e-12	7.09842e-13	3.32114e-12	3.03971e-14	2.17227e-15	8.80064e-13	4.88989e-14	4.86083e-14	2.97479e-17	4.36825e-14	1.86537e-11
					CH: ion-exchanger production for water treatment ecoinvent 3.5		4.5062e-13	4.51891e-13	6.46333e-16	1.37672e-13	4.31504e-15	6.95489e-15	9.50175e-17	5.87205e-14	5.37898e-13	2.35332e-14	9.16264e-15	1.11548e-14	1.84834e-17	1.1416e-14	7.52581e-16	7.24969e-16	6.76411e-18	1.22427e-15	4.14649e-12
					DE: Electricity grid mix 1kV-60kV ts		4.15651e-11	4.13346e-11	1.20672e-14	1.20356e-11	1.59832e-13	2.59799e-15	1.7044e-16	1.28957e-14	9.68429e-13	6.70056e-13	3.22279e-12	8.75775e-15	1.2848e-15	7.68883e-14	4.35253e-14	4.33059e-14	2.04066e-17	3.86006e-14	1.35413e-11
					DE: Tap water from groundwater ts		3.44827e-12	3.70587e-12	1.51993e-15	1.07718e-12	3.7384e-11	7.31958e-15	4.30603e-16	3.5776e-14	1.80281e-12	1.62033e-14	8.9144e-14	1.04844e-14	8.6897e-16	7.91759e-13	4.62019e-15	4.57661e-15	2.57699e-18	3.85654e-15	9.6565e-13
					DE: X.03 - ultra pure water system -rev4- (001) ecoinvent 3.5 <u-so>		1.77905e-20	1.77905e-20	0	0	-1.0853e-22	0	6.33785e-21	0	0	0	0	0	9.2302e-22	0	0	0	0	0	0
					EU-28: Compressed air ts		7.70414e-16	7.66566e-16	3.46698e-19	3.10593e-16	6.90079e-18	5.67427e-20	2.0446e-21	2.98278e-19	1.77927e-17	4.93773e-17	4.43858e-17	1.80579e-19	1.7657e-20	9.98111e-19	8.87578e-19	8.81872e-19	2.44976e-22	1.10611e-18	2.26286e-16
				DE: Electricity grid mix 1kV-60kV ts			2.18003e-10	2.16794e-10	6.32907e-14	6.31248e-11	8.38298e-13	1.36261e-14	8.93933e-16	6.76363e-14	5.07927e-12	3.51435e-12	1.69031e-11	4.59332e-14	6.7386e-15	4.03269e-13	2.28284e-13	2.27133e-13	1.0703e-16	2.02455e-13	7.10224e-11
				DE: Sodium hydroxide mix (50%) ts			5.38592e-11	5.36848e-11	2.3445e-14	1.66552e-11	2.33823e-13	4.24142e-15	2.29286e-16	1.93986e-14	1.52942e-12	6.42272e-13	3.14924e-12	1.21689e-14	1.7356e-15	1.60488e-13	9.48454e-14	9.40428e-14	2.17903e-17	6.94416e-14	1.44204e-11
			DE: X.08 - caustic exhaust air washer -rev4- (001) <Mfg>				0.0157838	0.0157126	1.0943e-05	0.00545423	0.00135714	2.15497e-06	8.11471e-08	8.96025e-06	0.000710124	0.000239032	0.00114584	6.02184e-06	4.95293e-07	5.54161e-05	1.66256e-05	1.64934e-05	7.68938e-09	3.6537e-05	0.00551952
				DE: X.03 - ultrapure water system -rev4- (001) <Mfg>			0.00157869	0.00157968	4.94246e-07	0.000460111	0.0013038	5.85872e-07	2.41699e-08	3.72904e-06	0.000114905	2.46482e-05	0.000115321	1.05549e-06	7.54288e-08	3.05589e-05	1.69794e-06	1.68785e-06	1.03295e-09	1.51681e-06	0.000647721
					CH: ion-exchanger production for water treatment ecoinvent 3.5		1.56471e-05	1.56912e-05	2.24429e-08	4.78045e-06	1.49833e-07	2.41498e-07	3.29933e-09	2.03898e-06	1.86777e-05	8.17154e-07	3.18159e-07	3.87332e-07	6.41808e-10	3.96404e-07	2.61322e-08	2.51734e-08	2.34873e-10	4.2511e-08	0.00014398
					DE: Electricity grid mix 1kV-60kV ts		0.00144328	0.00143528	4.19014e-07	0.000417916	5.54993e-06	9.02111e-08	5.91826e-09	4.47785e-07	3.36272e-05	2.32666e-05	0.000111906	3.04099e-07	4.46127e-08	2.66983e-06	1.51135e-06	1.50373e-06	7.08587e-10	1.34035e-06	0.000470202
					DE: Tap water from groundwater ts		0.000119736	0.000128681	5.27773e-08	3.74032e-05	0.0012981	2.54161e-07	1.4952e-08	1.24227e-06	6.25997e-05	5.62636e-07	3.09539e-06	3.64054e-07	3.01737e-08	2.74926e-05	1.60429e-07	1.58916e-07	8.94821e-11	1.33912e-07	3.35307e-05
					DE: X.03 - ultra pure water system -rev4- (001) ecoinvent 3.5 <u-so>		6.17746e-13	6.17746e-13	0	0	-3.76855e-15	0	2.20072e-13	0	0	0	0	0	3.20504e-14	0	0	0	0	0	0
					EU-28: Compressed air ts		2.67514e-08	2.66178e-08	1.20386e-11	1.07849e-08	2.39619e-10	1.9703e-12	7.09956e-14	1.03572e-11	6.17825e-10	1.71455e-09	1.54123e-09	6.27031e-12	6.13112e-13	3.46578e-11	3.08198e-11	3.06217e-11	8.5064e-15	3.84079e-11	7.85743e-09
				DE: Electricity grid mix 1kV-60kV ts			0.0129284	0.0128567	3.75338e-06	0.00374355	4.97143e-05	8.08079e-07	5.30137e-08	4.0111e-06	0.000301221	0.000208414	0.00100242	2.72401e-06	3.99625e-07	2.39154e-05	1.35381e-05	1.34699e-05	6.34728e-09	1.20064e-05	0.0042119
				DE: Sulphuric acid (96%) ts			0.00127674	0.00127621	6.69539e-06	0.00125057	3.62342e-06	7.61019e-07	3.96349e-09	1.22011e-06	0.000293998	5.96962e-06	2.80977e-05	2.24234e-06	2.02393e-08	9.4182e-07	1.38958e-06	1.33568e-06	3.09148e-10	2.30139e-05	0.000659899
			DE: X.09.oe3 - Process exhaust ventilators -rev4- (001) <LC>				0.00224225	0.00222982	6.50971e-07	0.000649265	8.62225e-06	1.4015e-07	9.19447e-09	6.95668e-07	5.22425e-05	3.61465e-05	0.000173855	4.72442e-07	6.93093e-08	4.14779e-06	2.348e-06	2.33616e-06	1.10085e-09	2.08233e-06	0.000730495
				DE: Electricity grid mix 1kV-60kV ts			0.00224225	0.00222982	6.50971e-07	0.000649265	8.62225e-06	1.4015e-07	9.19447e-09	6.95668e-07	5.22425e-05	3.61465e-05	0.000173855	4.72442e-07	6.93093e-08	4.14779e-06	2.348e-06	2.33616e-06	1.10085e-09	2.08233e-06	0.000730495
			DE: X.09.oe4 - Process exhaust ventilators -rev4- (001) <LC>				0.00134535	0.00133789	3.90583e-07	0.000389559	5.17335e-06	8.40899e-08	5.51668e-09	4.17401e-07	3.13455e-05	2.16879e-05	0.000104313	2.83465e-07	4.15856e-08	2.48867e-06	1.4088e-06	1.4017e-06	6.60507e-10	1.2494e-06	0.000438297
				DE: Electricity grid mix 1kV-60kV ts			0.00134535	0.00133789	3.90583e-07	0.000389559	5.17335e-06	8.40899e-08	5.51668e-09	4.17401e-07	3.13455e-05	2.16879e-05	0.000104313	2.83465e-07	4.15856e-08	2.48867e-06	1.4088e-06	1.4017e-06	6.60507e-10	1.2494e-06	0.000438297
			DE: Electricity grid mix 1kV-60kV ts				0.401713	0.399486	0.000116626	0.11632	0.00154473	2.51087e-05	1.64725e-06	0.000124633	0.00935956	0.00647588	0.0311472	8.46409e-05	1.24172e-05	0.000743101	0.000420658	0.000418538	1.97223e-07	0.000373063	0.130873
			DE: Sludge (acid/basic) ts				0.0593844	0.0593657	1.29554e-05	0.00270739	1.90206e-05	1.73136e-06	9.75564e-09	8.65856e-05	0.0322451	2.9496e-05	0.000150984	0.000348936	1.27556e-07	0.000212717	9.38541e-05	9.36929e-05	2.65093e-08	4.14663e-05	1.97523
			DE: Sodium hydroxide mix (50%) ts				0.0660508	0.0658368	2.8752e-05	0.0204253	0.000286751	5.2015e-06	2.81187e-07	2.37896e-05	0.00187561	0.000787656	0.0038621	1.49234e-05	2.12846e-06	0.000196816	0.000116315	0.00011533	2.67227e-08	8.51603e-05	0.0176846
			DE: Tap water from groundwater ts				-0.00357898	-0.00384635	-1.57755e-06	-0.00111801	-0.0388011	-7.59704e-06	-4.46926e-07	-3.71321e-05	-0.00187114	-1.68176e-05	-9.25232e-05	-1.08818e-05	-9.0191e-07	-0.000821772	-4.79532e-06	-4.75009e-06	-2.67468e-09	-4.00273e-06	-0.00100225
			EU-28: Compressed air ts				0.0143136	0.0142421	6.44133e-06	0.00577054	0.00012821	1.05423e-06	3.79868e-08	5.54172e-06	0.000330573	0.000917385	0.000824647	3.35498e-06	3.28051e-07	1.8544e-05	1.64904e-05	1.63844e-05	4.55142e-09	2.05505e-05	0.00420418
			GLO: market for iron(III) chloride, without water, in 14% iron solution state ecoinvent 3.5				0.0318222	0.0314667	7.66209e-05	0.0127101	0.000627897	0.000741652	2.92342e-05	0.00274681	0.1251	0.00678297	0.00146457	0.00107237	2.291e-06	0.000314262	9.73866e-05	9.60958e-05	2.6952e-08	0.00017187	0.281729
			RER: market for aluminium sulfate, powder ecoinvent 3.5				0.0386913	0.0386531	0.000137779	0.0188547	0.00114964	0.000886634	3.20206e-05	0.0197789	0.135478	0.0084459	0.00139709	0.00133523	1.98493e-06	0.00140825	0.000130995	0.000129231	1.76886e-08	0.000415201	0.280006
			RER: market for calcium chloride ecoinvent 3.5				0.0258996	0.0253267	7.02957e-05	0.00825123	0.00128017	0.000452933	1.88439e-05	0.00177013	0.0881455	0.00187142	0.00287297	0.000681966	2.86987e-06	0.000225006	7.21868e-05	7.11209e-05	9.97979e-09	0.000260197	0.212676
		DE: X.07 - acidic exhaust air washer -rev5- (001) <Mfg>					3.33435e-09	3.32012e-09	1.06095e-12	9.77533e-10	4.05807e-10	3.65035e-13	1.91164e-14	2.04297e-12	1.04213e-10	5.1135e-11	2.456e-10	9.29916e-13	1.11869e-13	1.51711e-11	3.90913e-12	3.88556e-12	1.66617e-15	3.31599e-12	1.09381e-09
			DE: X.03 - ultrapure water system -rev4- (001) <Mfg>				4.77726e-10	4.78025e-10	1.49563e-13	1.39234e-10	3.94542e-10	1.7729e-13	7.31403e-15	1.12844e-12	3.47713e-11	7.45875e-12	3.48973e-11	3.19401e-13	2.28254e-14	9.24738e-12	5.13812e-13	5.10758e-13	3.1258e-16	4.59e-13	1.96006e-10
				CH: ion-exchanger production for water treatment ecoinvent 3.5			4.73495e-12	4.74831e-12	6.79142e-15	1.44661e-12	4.53408e-14	7.30793e-14	9.98408e-16	6.17013e-13	5.65203e-12	2.47278e-13	9.62776e-14	1.1721e-13	1.94217e-16	1.19955e-13	7.90784e-15	7.6177e-15	7.10747e-17	1.28642e-14	4.35697e-11
				DE: Electricity grid mix 1kV-60kV ts			4.3675e-10	4.34329e-10	1.26797e-13	1.26465e-10	1.67946e-12	2.72987e-14	1.79092e-15	1.35504e-13	1.01759e-11	7.0407e-12	3.38639e-11	9.20231e-14	1.35002e-14	8.07914e-13	4.57347e-13	4.55042e-13	2.14425e-16	4.05601e-13	1.42287e-10
				DE: Tap water from groundwater ts			3.62331e-11	3.89399e-11	1.59709e-14	1.13186e-11	3.92817e-10	7.69114e-14	4.52462e-15	3.75921e-13	1.89432e-11	1.70259e-13	9.36692e-13	1.10166e-13	9.13082e-15	8.3195e-12	4.85472e-14	4.80893e-14	2.70781e-17	4.05231e-14	1.01467e-11
				DE: X.03 - ultra pure water system -rev4- (001) ecoinvent 3.5 <u-so>			1.86935e-19	1.86935e-19	0	0	-1.1404e-21	0	6.65957e-20	0	0	0	0	0	9.69875e-21	0	0	0	0	0	0
				EU-28: Compressed air ts			8.09522e-15	8.05479e-15	3.64297e-18	3.2636e-15	7.25109e-17	5.96232e-19	2.14839e-20	3.13419e-18	1.86959e-16	5.18838e-16	4.66389e-16	1.89745e-18	1.85533e-19	1.04878e-17	9.32634e-18	9.26638e-18	2.57411e-21	1.16226e-17	2.37773e-15
			DE: Electricity grid mix 1kV-60kV ts				2.29069e-09	2.27799e-09	6.65035e-13	6.63292e-10	8.80853e-12	1.43178e-13	9.39311e-15	7.10697e-13	5.33711e-11	3.69275e-11	1.77611e-10	4.82648e-13	7.08067e-14	4.23739e-12	2.39872e-12	2.38663e-12	1.12463e-15	2.12732e-12	7.46277e-10
			DE: Sodium hydroxide mix (50%) ts				5.65933e-10	5.64099e-10	2.46352e-13	1.75007e-10	2.45693e-12	4.45673e-14	2.40926e-15	2.03833e-13	1.60705e-11	6.74876e-12	3.30911e-11	1.27866e-13	1.8237e-14	1.68635e-12	9.966e-13	9.88166e-13	2.28964e-16	7.29666e-13	1.51524e-10
		DE: X.08 - caustic exhaust air washer -rev4- (001) <Mfg>					0.259355	0.258185	0.000179812	0.0896222	0.0223001	3.54098e-05	1.33338e-06	0.000147232	0.0116685	0.0039277	0.018828	9.8949e-05	8.1385e-06	0.000910579	0.000273187	0.000271014	1.26349e-07	0.000600365	0.090695
			DE: X.03 - ultrapure water system -rev4- (001) <Mfg>				0.0259406	0.0259568	8.1213e-06	0.00756039	0.0214236	9.62686e-06	3.97152e-07	6.12744e-05	0.00188808	0.000405011	0.00189493	1.73435e-05	1.23942e-06	0.000502133	2.79e-05	2.77342e-05	1.69731e-08	2.49237e-05	0.0106431
				CH: ion-exchanger production for water treatment ecoinvent 3.5			0.000257108	0.000257833	3.68775e-07	7.85509e-05	2.46201e-06	3.96821e-06	5.42136e-08	3.35038e-05	0.000306905	1.34272e-05	5.22788e-06	6.36452e-06	1.0546e-08	6.51358e-06	4.29396e-07	4.13642e-07	3.85936e-09	6.98527e-07	0.00236584
				DE: Electricity grid mix 1kV-60kV ts			0.0237155	0.0235841	6.88511e-06	0.00686707	9.11947e-05	1.48232e-06	9.72469e-08	7.35785e-06	0.000552551	0.00038231	0.00183881	4.99686e-06	7.33062e-07	4.38698e-05	2.4834e-05	2.47088e-05	1.16433e-08	2.20241e-05	0.00772621
				DE: Tap water from groundwater ts			0.00196746	0.00211444	8.67219e-07	0.000614598	0.02133	4.17629e-06	2.45687e-07	2.04125e-05	0.00102862	9.24505e-06	5.08624e-05	5.98203e-06	4.95804e-07	0.000451749	2.63612e-06	2.61125e-06	1.47034e-09	2.2004e-06	0.000550966
				DE: X.03 - ultra pure water system -rev4- (001) ecoinvent 3.5 <u-so>			1.01506e-11	1.01506e-11	0	0	-6.19235e-14	0	3.61615e-12	0	0	0	0	0	5.26643e-13	0	0	0	0	0	0
				EU-28: Compressed air ts			4.39571e-07	4.37375e-07	1.97814e-10	1.77214e-07	3.93735e-09	3.23754e-11	1.16658e-12	1.70187e-10	1.01519e-08	2.81729e-08	2.5325e-08	1.03032e-10	1.00745e-11	5.69487e-10	5.06421e-10	5.03165e-10	1.39774e-13	6.31106e-10	1.29111e-07
			DE: Electricity grid mix 1kV-60kV ts				0.212436	0.211258	6.16744e-05	0.0615128	0.00081689	1.32781e-05	8.71103e-07	6.59091e-05	0.00494956	0.0034246	0.0164714	4.47601e-05	6.56651e-06	0.00039297	0.000222454	0.000221333	1.04296e-07	0.000197285	0.0692086
			DE: Sulphuric acid (96%) ts				0.020979	0.0209702	0.000110016	0.020549	5.95389e-05	1.25048e-05	6.51268e-08	2.00484e-05	0.00483089	9.80909e-05	0.000461692	3.68454e-05	3.32566e-07	1.54757e-05	2.28331e-05	2.19474e-05	5.07982e-09	0.000378157	0.0108433
		DE: X.09.oe1 - Process exhaust ventilators -rev4- (001) <LC>					0.0333713	0.0331863	9.68836e-06	0.00966298	0.000128324	2.08584e-06	1.36841e-07	1.03536e-05	0.000777521	0.000537967	0.00258748	7.03132e-06	1.03153e-06	6.17312e-05	3.49451e-05	3.47689e-05	1.63838e-08	3.09912e-05	0.0108719
			DE: Electricity grid mix 1kV-60kV ts				0.0333713	0.0331863	9.68836e-06	0.00966298	0.000128324	2.08584e-06	1.36841e-07	1.03536e-05	0.000777521	0.000537967	0.00258748	7.03132e-06	1.03153e-06	6.17312e-05	3.49451e-05	3.47689e-05	1.63838e-08	3.09912e-05	0.0108719
		DE: X.09.oe3 - Process exhaust ventilators -rev4- (001) <LC>					0.0235607	0.0234301	6.84016e-06	0.00682224	9.05994e-05	1.47264e-06	9.6612e-08	7.30982e-06	0.000548944	0.000379814	0.00182681	4.96424e-06	7.28276e-07	4.35834e-05	2.46719e-05	2.45475e-05	1.15673e-08	2.18804e-05	0.00767577
			DE: Electricity grid mix 1kV-60kV ts				0.0235607	0.0234301	6.84016e-06	0.00682224	9.05994e-05	1.47264e-06	9.6612e-08	7.30982e-06	0.000548944	0.000379814	0.00182681	4.96424e-06	7.28276e-07	4.35834e-05	2.46719e-05	2.45475e-05	1.15673e-08	2.18804e-05	0.00767577
		DE: X.09.oe4 - Process exhaust ventilators -rev4- (001) <LC>					0.0221064	0.0219838	6.41793e-06	0.00640111	8.50068e-05	1.38174e-06	9.06483e-08	6.8586e-06	0.000515059	0.000356369	0.00171404	4.65781e-06	6.83321e-07	4.0893e-05	2.31489e-05	2.30322e-05	1.08532e-08	2.05297e-05	0.00720195
			DE: Electricity grid mix 1kV-60kV ts				0.0221064	0.0219838	6.41793e-06	0.00640111	8.50068e-05	1.38174e-06	9.06483e-08	6.8586e-06	0.000515059	0.000356369	0.00171404	4.65781e-06	6.83321e-07	4.0893e-05	2.31489e-05	2.30322e-05	1.08532e-08	2.05297e-05	0.00720195
		DE: X.09.oe5 - Process exhaust ventilators -rev4- (001) <LC>					0.0145437	0.014463	4.22232e-06	0.00421126	5.59255e-05	9.09038e-07	5.96371e-08	4.51223e-06	0.000338854	0.000234453	0.00112766	3.06435e-06	4.49553e-07	2.69033e-05	1.52295e-05	1.51528e-05	7.14029e-09	1.35064e-05	0.00473813
			DE: Electricity grid mix 1kV-60kV ts				0.0145437	0.014463	4.22232e-06	0.00421126	5.59255e-05	9.09038e-07	5.96371e-08	4.51223e-06	0.000338854	0.000234453	0.00112766	3.06435e-06	4.49553e-07	2.69033e-05	1.52295e-05	1.51528e-05	7.14029e-09	1.35064e-05	0.00473813
		DE: X.09.oe6 - Process exhaust ventilators -rev4- (001) <LC>					0.0113441	0.0112812	3.29341e-06	0.00328478	4.36219e-05	7.0905e-07	4.65169e-08	3.51954e-06	0.000264306	0.000182874	0.000879573	2.39019e-06	3.50652e-07	2.09846e-05	1.1879e-05	1.18192e-05	5.56943e-09	1.0535e-05	0.00369574
			DE: Electricity grid mix 1kV-60kV ts				0.0113441	0.0112812	3.29341e-06	0.00328478	4.36219e-05	7.0905e-07	4.65169e-08	3.51954e-06	0.000264306	0.000182874	0.000879573	2.39019e-06	3.50652e-07	2.09846e-05	1.1879e-05	1.18192e-05	5.56943e-09	1.0535e-05	0.00369574
		DE: X.09.oe7 - Process exhaust ventilators -rev4- (001) <LC>					5.23572e-05	5.20669e-05	1.52004e-08	1.51605e-05	2.01332e-07	3.27254e-09	2.14693e-10	1.6244e-08	1.21988e-06	8.44032e-07	4.05957e-06	1.10316e-08	1.61839e-09	9.68519e-08	5.48264e-08	5.455e-08	2.5705e-11	4.8623e-08	1.70573e-05
			DE: Electricity grid mix 1kV-60kV ts				5.23572e-05	5.20669e-05	1.52004e-08	1.51605e-05	2.01332e-07	3.27254e-09	2.14693e-10	1.6244e-08	1.21988e-06	8.44032e-07	4.05957e-06	1.10316e-08	1.61839e-09	9.68519e-08	5.48264e-08	5.455e-08	2.5705e-11	4.8623e-08	1.70573e-05
		DE: X.10 - general exhausts to air filter <LC>					0.000342646	0.000341198	1.14051e-06	0.000120983	3.08395e-06	7.00822e-06	2.18913e-07	6.32479e-05	0.00116769	2.46654e-05	8.42512e-06	1.22397e-05	2.46062e-08	1.0791e-05	9.6031e-07	9.25068e-07	1.2406e-10	4.85212e-06	0.00475952
			GLO: market for air filter, central unit, 600 m3/h ecoinvent 3.5				0.000337689	0.000336241	1.13841e-06	0.000120791	3.0818e-06	6.87526e-06	2.18805e-07	6.31989e-05	0.0011605	2.46391e-05	8.38806e-06	1.20459e-05	1.34445e-08	1.07896e-05	9.48003e-07	9.13746e-07	1.21876e-10	4.84746e-06	0.00472573
			RoW: treatment of used air filter, central unit, 600 m3/h ecoinvent 3.5				4.95696e-06	4.95704e-06	2.09589e-09	1.91877e-07	2.15345e-09	1.32961e-07	1.0851e-10	4.9024e-08	7.18539e-06	2.63614e-08	3.70569e-08	1.93814e-07	1.11617e-08	1.40223e-09	1.23071e-08	1.13217e-08	2.18422e-12	4.66037e-09	3.37937e-05
		DE: Hazardous waste (statistical average) (no C, worst case scenario incl. landfill) ts					-0.000208345	-0.000207436	-1.93678e-07	-5.06431e-05	-5.51392e-07	-3.7365e-08	-3.8079e-10	-1.39641e-06	-0.000517694	-1.23343e-06	-6.84136e-06	-5.58662e-06	-3.58548e-09	-7.55153e-06	-1.10488e-06	-1.10187e-06	-2.09601e-10	-6.08503e-07	-0.0314688
		DE: Municipal waste water treatment (mix) ts					0.441601	0.676178	0.000149904	0.0604066	-0.604612	0.00624501	0.000375819	0.0309882	1.50559	0.00252749	0.0132957	0.00856227	0.000738507	-0.00185595	0.000544969	0.000542641	1.75291e-06	0.000465918	0.141009
		DE: Municipal waste water treatment (mix) ts					0.0908635	0.13913	3.08442e-05	0.0124292	-0.124405	0.00128497	7.73281e-05	0.0063761	0.309788	0.000520055	0.00273572	0.00176177	0.000151955	-0.00038188	0.000112132	0.000111653	3.60677e-07	9.58669e-05	0.029014
		DE: treatment of waste, from silicon wafer production, underground deposit ecoinvent 3.5					-0.000685052	-0.000525827	-1.3757e-06	-0.000209854	-4.56162e-06	-5.09616e-06	-3.19495e-07	-0.000102516	-0.000490175	-1.34732e-05	-0.000132978	-7.6559e-06	-2.20442e-08	-2.93521e-05	-1.97526e-06	-1.84439e-06	-1.65015e-10	-2.36007e-06	-0.00167201
		DE: X.12 - exhaust (VOC) to air -rev4- (001) <u-so>					0	0	0	0	0	6.52868e-07	0	0	0	0	0	8.60429e-08	0	0	0	0	0	0	0.00297919
	DE: C - module production (007) <Mfg>						94.2366	91.5531	0.104184	28.806	0.619367	0.150563	0.0052736	0.564501	22.6706	2.28777	6.99673	0.293144	0.002588	0.727864	0.204606	0.202613	2.89061e-05	0.308029	188.127
		DE: C.01 - module assembly (007) <Mfg>					92.6874	92.4739	0.101748	28.2112	0.605995	0.130042	0.00457388	0.497547	20.7918	2.14632	4.73675	0.26247	0.00218835	0.7236	0.199129	0.197323	2.73365e-05	0.30268	180.873
			DE: cell fixation tape (generic tape) <Mfg>				0.111076	0.0999153	6.0027e-05	0.0464956	0.0150012	8.98131e-05	1.38764e-05	6.79481e-05	-0.00963549	0.00110425	0.0812523	0.000147203	6.61895e-05	0.00040304	0.000246863	0.00024131	2.31929e-07	0.000189341	0.0549536
				DE: Elastomer joint tape, polyurethane (EN15804 A1-A3) ts			0.0453485	0.0452723	2.17678e-05	0.0215382	0.00029498	1.05005e-05	3.37471e-07	3.35349e-05	0.00508017	0.000376126	0.00198352	2.72874e-05	1.79355e-06	0.00014031	7.75474e-05	7.48877e-05	3.3397e-08	6.67732e-05	0.0139723
				DE: Joint sealing tape fabric tape (EN15804 A1-A3) ts			0.0657277	0.054643	3.82592e-05	0.0249575	0.0147062	7.93126e-05	1.35389e-05	3.44132e-05	-0.0147157	0.000728119	0.0792688	0.000119915	6.4396e-05	0.00026273	0.000169316	0.000166423	1.98532e-07	0.000122568	0.0409814
			DE: copper smartwires (SWCT wires) <Mfg>				0.71046	0.708002	0.00107884	0.193434	0.00992246	0.00217269	1.64522e-06	0.000734842	0.87416	0.00379276	0.983794	0.028466	1.37237e-05	0.274776	0.00146167	0.00145417	6.16118e-07	0.00336264	56.8784
				DE: Copper mix (99,999% from electrolysis) ts			0.585926	0.584169	0.00104271	0.157391	0.00944445	0.00216492	1.13547e-06	0.0006963	0.87126	0.00179404	0.974147	0.0284398	9.88068e-06	0.274546	0.00133128	0.00132443	5.55072e-07	0.00324707	56.8378
				DE: District heating mix (EN15804 B6) ts			0.000557493	0.00054378	1.36419e-07	0.000144655	1.27592e-06	2.07644e-08	1.37318e-09	7.80217e-08	1.18973e-05	1.42907e-07	3.48162e-05	8.96631e-08	1.08847e-08	6.72329e-07	5.73862e-07	5.70195e-07	1.79321e-10	4.34544e-07	0.000141212
				DE: Electricity grid mix 1kV-60kV ts			0.123976	0.123289	3.59928e-05	0.0358985	0.000476732	7.74902e-06	5.08371e-07	3.84641e-05	0.00288853	0.00199858	0.00961262	2.61217e-05	3.83218e-06	0.000229335	0.000129823	0.000129169	6.08668e-08	0.000115134	0.0403898
			DE: interconnection ribbon (copper wires) <Mfg>				0.323114	0.322071	0.000533008	0.0873815	0.00486191	0.00109143	6.86948e-07	0.000359196	0.439187	0.0013556	0.492501	0.0143205	5.84349e-06	0.138239	0.000699598	0.000696005	2.93207e-07	0.00166052	28.6173
				DE: Copper mix (99,999% from electrolysis) ts			0.294914	0.294029	0.000524827	0.0792196	0.00475367	0.00108967	5.71517e-07	0.000350468	0.43853	0.000902995	0.490316	0.0143146	4.97323e-06	0.138187	0.00067007	0.000666626	2.79384e-07	0.00163435	28.6081
				DE: District heating mix (EN15804 B6) ts			0.000126243	0.000123138	3.08917e-08	3.27567e-05	2.8893e-07	4.70206e-09	3.10953e-10	1.76678e-08	2.69412e-06	3.2361e-08	7.88404e-06	2.0304e-08	2.46481e-09	1.52247e-07	1.2995e-07	1.29119e-07	4.06069e-11	9.84015e-08	3.19771e-05
				DE: Electricity grid mix 1kV-60kV ts			0.0280743	0.0279187	8.15055e-06	0.0081292	0.000107956	1.75476e-06	1.1512e-07	8.71019e-06	0.000654107	0.000452577	0.00217677	5.91526e-06	8.67795e-07	5.19328e-05	2.93983e-05	2.92501e-05	1.37833e-08	2.60721e-05	0.00914624
			DE: j-box set (3 junction boxes) <Mfg>				2.04689	2.01823	0.00263366	1.19145	0.0244253	0.0163149	0.000693925	0.0740107	1.74824	0.232741	0.0594503	0.0234649	5.56352e-05	0.00385155	0.00431359	0.00409912	5.09302e-07	0.00673563	4.52996
				GLO: market for polyethylene terephthalate, granulate, amorphous ecoinvent 3.5			1.19255	1.19144	0.00162386	0.656018	0.0134586	0.00904869	0.000320723	0.0436304	1.17228	0.0533417	0.0183783	0.0136435	2.38576e-05	0.00246619	0.00261321	0.00249546	2.45871e-07	0.00373406	3.75366
				GLO: market for polyethylene, high density, granulate ecoinvent 3.5			0.123118	0.123811	0.00010588	0.0971349	0.000719877	0.000334094	2.16176e-06	0.0026242	0.0118409	0.000141228	0.00023194	0.000500402	2.96234e-07	1.37738e-05	0.000287063	0.000259131	2.33308e-09	0.000320597	0.0838079
				GLO: market for polypropylene, granulate ecoinvent 3.5			0.203272	0.204034	0.000164564	0.154697	0.00147206	0.000471426	6.96876e-06	0.0036057	0.017539	0.000212535	0.00037265	0.000717004	1.21822e-06	2.2767e-05	0.000455473	0.000417097	3.67038e-09	0.00049887	0.136403
				RER: injection moulding ecoinvent 3.5			0.527952	0.498937	0.00073936	0.283603	0.0087748	0.00646064	0.000364072	0.0241504	0.546582	0.179046	0.0404674	0.00860408	3.02631e-05	0.00134882	0.000957843	0.000927429	2.57428e-07	0.0021821	0.556089
			DE: Aluminium frame profile, powder coated (EN15804 A1-A3) ts				40.4025	40.4461	0.0303987	12.6978	0.300426	0.00706006	0.000143993	0.0308498	1.74347	0.995669	0.796087	0.0182623	0.00079468	0.203155	0.0605267	0.0601035	8.63738e-06	0.0948139	10.0238
			DE: Electricity grid mix 1kV-60kV ts				23.5649	23.4342	0.00684136	6.82343	0.0906153	0.0014729	9.6629e-05	0.0073111	0.54904	0.379881	1.82713	0.00496511	0.000728404	0.043591	0.0246762	0.0245518	1.15693e-05	0.0218842	7.67711
			DE: Hazardous waste (statistical average) (no C, worst case scenario incl. landfill) ts				-5.67632e-05	-5.65155e-05	-5.27672e-08	-1.37976e-05	-1.50226e-07	-1.018e-08	-1.03745e-10	-3.80448e-07	-0.000141045	-3.36045e-07	-1.86391e-06	-1.52206e-06	-9.76855e-10	-2.0574e-06	-3.01023e-07	-3.00201e-07	-5.71053e-11	-1.65785e-07	-0.00857361
			DE: Municipal waste water treatment (mix) ts				0.00330842	0.00506584	1.12307e-06	0.000452559	-0.00452968	4.67869e-05	2.81559e-06	0.00023216	0.0112797	1.89357e-05	9.96102e-05	6.41475e-05	5.5328e-06	-1.39046e-05	4.08285e-06	4.0654e-06	1.31326e-08	3.4906e-06	0.00105643
			DE: Sealants based on silicone - Deutsche Bauchemie e.V. (DBC) (A5) ts-EPD <p-agg>				0.000374502	0.000459942	7.22616e-09	1.6769e-06	1.03166e-06	2.06467e-10	4.41259e-12	8.64345e-10	1.31682e-07	5.93137e-08	3.24267e-08	1.95511e-09	9.38198e-11	2.44083e-08	1.06405e-05	6.61716e-06	1.98257e-12	3.32652e-08	1.33199e-06
			DE: Tap water from groundwater ts				0.00168015	0.00180567	7.40579e-07	0.000524849	0.0182152	3.56643e-06	2.09809e-07	1.74317e-05	0.000878409	7.895e-06	4.3435e-05	5.10847e-06	4.23402e-07	0.000385781	2.25116e-06	2.22993e-06	1.25563e-09	1.87908e-06	0.000470508
			DE: Tap water from groundwater ts				-0.00126011	-0.00135425	-5.55435e-07	-0.000393636	-0.0136614	-2.67482e-06	-1.57357e-07	-1.30738e-05	-0.000658807	-5.92125e-06	-3.25763e-05	-3.83135e-06	-3.17551e-07	-0.000289335	-1.68837e-06	-1.67245e-06	-9.4172e-10	-1.40931e-06	-0.000352881
			DE: treatment of waste, from silicon wafer production, underground deposit ecoinvent 3.5				-0.000186641	-0.00014326	-3.74805e-07	-5.71742e-05	-1.2428e-06	-1.38844e-06	-8.70458e-08	-2.79301e-05	-0.000133547	-3.67073e-06	-3.62294e-05	-2.08583e-06	-6.00589e-09	-7.99692e-06	-5.38154e-07	-5.025e-07	-4.49579e-11	-6.42996e-07	-0.000455536
			EU-25: Copper wire; technology mix; market mix, at plant; cross section 1 mm ECI/ELCD				0.127049	0.126356	0.00019152	0.0399507	0.00295382	9.13795e-05	2.83009e-07	0.000209321	0.0507749	0.0052535	0	0.000189634	9.04266e-07	0.0173937	0.000282838	0.000281444	6.25762e-08	0.000568329	0.225545
			EU-28: Compressed air ts				0.00214779	0.00213707	9.6654e-07	0.000865886	1.92383e-05	1.5819e-07	5.70002e-09	8.31551e-07	4.96033e-05	0.000137656	0.000123741	5.03425e-07	4.92249e-08	2.78258e-06	2.47443e-06	2.45852e-06	6.82953e-10	3.08366e-06	0.00063085
			GLO: market for electronics scrap ecoinvent 3.5				-0.000353558	-0.000353432	-6.62828e-07	-0.000125189	-1.15791e-06	-2.09723e-06	-4.26564e-08	-1.08886e-05	-0.000267046	-9.13638e-06	-1.71134e-05	-7.06068e-06	-4.06722e-09	-9.10809e-07	-2.37088e-06	-2.3327e-06	-1.61511e-10	-1.62768e-06	-0.00630494
			GLO: market for packaging film, low density polyethylene ecoinvent 3.5				0.0814989	0.0795065	9.22062e-05	0.0547561	0.00108744	0.000406545	9.97423e-06	0.00247203	0.0246128	0.00303057	0.00223387	0.00058467	1.61149e-06	3.46388e-05	0.000200661	0.000185096	8.3745e-09	0.000251051	0.0909689
			GLO: market for solar glass, low-iron ecoinvent 3.5				25.2912	25.2088	0.0598985	7.06705	0.156427	0.100564	0.00360716	0.38073	15.3513	0.522373	0.493824	0.17108	0.000515353	0.0420598	0.106671	0.105666	5.38922e-06	0.173162	72.7476
			RER: market for ethylene vinyl acetate copolymer ecoinvent 3.5				0.00684172	0.00682761	6.70685e-06	0.00528441	0.000113388	3.91886e-05	1.39711e-06	0.000166051	0.0051187	0.000383976	8.60118e-05	5.65941e-05	1.33292e-07	1.14914e-05	1.37666e-05	1.27953e-05	1.16695e-09	1.7635e-05	0.0116846
			RER: market for silicone product ecoinvent 3.5				0.00230841	0.00234487	3.35504e-06	0.000986033	9.15756e-05	1.87349e-05	7.766e-07	7.19733e-05	0.00207836	0.000220413	8.26448e-05	2.6171e-05	1.30761e-07	3.62935e-06	5.31019e-06	5.14344e-06	2.10122e-09	8.14451e-06	0.00359785
			RoW: treatment of electronics scrap, metals recovery in copper smelter ecoinvent 3.5				0.0139903	0.014002	8.71844e-06	0.001967	2.7568e-05	0.00067543	7.86279e-07	0.000365281	0.00241936	0.000372337	0.00013881	0.000852216	6.48843e-08	6.57185e-06	1.65617e-05	1.62335e-05	1.97217e-09	2.19081e-05	0.0253689
		DE: C.02 - module packaging (007) <Mfg>					1.54914	-0.920828	0.00243584	0.59474	0.0133719	0.0205208	0.000699723	0.0669542	1.87881	0.141447	2.25997	0.030674	0.000399648	0.00426427	0.00547676	0.00529019	1.56955e-06	0.00534856	7.25481
			GLO: market for EUR-flat pallet ecoinvent 3.5				0.388727	-2.06129	0.000909013	0.173926	0.00354982	0.00371039	0.000130899	0.0304759	0.475926	0.0243409	1.74022	0.00621757	1.0638e-05	0.00192925	0.00192445	0.00180677	1.98776e-07	0.00154936	2.55502
			RER: market for corrugated board box ecoinvent 3.5				1.16041	1.14046	0.00152682	0.420814	0.00982205	0.0168104	0.000568824	0.0364783	1.40289	0.117106	0.519747	0.0244565	0.00038901	0.00233502	0.00355231	0.00348342	1.37077e-06	0.0037992	4.69978

## Sheet: SHJ_relative
Inventory item							GWP	GWP(+BC)	PMFP	FDP	FWC	FETP	FEP	HTP(C)	HTP(NC)	IRP	LU	METP	MEP	MDP	POFP(E)	POFP(HH)	POFP	TAP	TETP
Life Cycle SHJ module [default] -rev5- (002) <LC>							1	1	1	1	1	1	1	1	1	1	1	1	1	1	1	1	1	1	1
	CN: A - wafer production (007) <Mfg>						0.720195	0.725728	0.809006	0.77707	0.942857	0.84136	0.904306	0.915789	0.706818	0.957204	0.486667	0.658784	0.85034	0.294211	0.7	0.698068	0.770053	0.768212	0.584775
		CN: A.01 - wafer fabrication (007) <Mfg>					0.712895	0.720874	0.804348	0.764331	0.942857	0.838527	0.904306	0.915789	0.704545	0.957204	0.45697	0.657095	0.846939	0.292632	0.692857	0.690821	0.770053	0.761589	0.577855
			CH: market for brass ecoinvent 3.5				0.000146472	0.000143689	0.00170807	0.000117197	6.10714e-05	0.00597734	0.004	0.00209474	0.0174773	4.62197e-05	0.000256364	0.00586149	0.00182653	0.00705263	0.000605952	0.000603865	0.00057754	0.00211921	0.0318339
			CN: Electricity grid mix 1kV-60kV ts				0.0291971	0.0291262	0.0150155	0.0178981	0.00667857	0.000154958	1.79426e-05	0.000279474	0.00119545	0.000319544	0.00487273	0.000663851	0.00264286	0.00371579	0.0269048	0.0271739	0.0112299	0.0182119	0.00792388
			CN: single-Si wafer production, photovoltaic (007) ecoinvent 3.5 <u-so>				0	0	0	0	-0.00742857	0.00614731	0.00148804	8.47368e-05	0.00153864	0	0	0.00449324	0.190816	0	0	0	0	0	2.33564e-21
			CN: Thermal energy from natural gas ts				0.0012635	0.00126048	0.000181763	0.00127037	1.51093e-06	6.12028e-06	7.90183e-08	9.3852e-06	4.73395e-06	2.09199e-07	1.0967e-05	5.89706e-06	3.85065e-06	6.07848e-05	0.000853601	0.000858363	0.00109453	0.000216466	3.36696e-05
			EU-28: Tap water from groundwater ts				2.41105e-09	2.57948e-09	7.05137e-10	2.059e-09	8.06889e-07	6.25219e-10	6.20821e-10	5.68581e-10	1.18539e-09	1.37055e-10	1.25172e-09	5.33029e-10	8.58578e-09	1.2589e-07	1.56912e-09	1.57621e-09	3.87834e-09	7.65732e-10	4.53482e-10
			GLO: glass wool mat production, without cullet ecoinvent 3.5				0.000150984	0.000150233	0.000202157	0.000147878	4.72508e-05	0.000207278	0.000136675	0.000287869	0.000169459	7.82332e-05	6.64165e-05	0.00016658	8.81804e-05	7.98019e-05	0.00021669	0.000215414	0.000162552	0.000189169	0.000177761
			GLO: market for acetic acid, without water, in 98% solution state ecoinvent 3.5				0.000311446	0.000310012	0.00036121	0.000543697	0.000240039	0.000341408	0.000239723	0.000239175	0.000364251	0.00013927	0.000127229	0.000291546	0.000123532	0.000181225	0.000381187	0.000362384	0.000351072	0.000321426	0.000586383
			GLO: market for alkylbenzene sulfonate, linear, petrochemical ecoinvent 3.5				0.00187682	0.00186737	0.00236695	0.00399661	0.000662941	0.00415905	0.00137692	0.00177297	0.00237531	0.000299685	0.00109683	0.00329402	0.000800755	0.00133981	0.00284418	0.00271184	0.0012649	0.00233189	0.00471881
			GLO: market for silicon carbide ecoinvent 3.5				0.0860575	0.0860481	0.108099	0.0703176	0.0158642	0.0760853	0.0744465	0.0614355	0.0550287	0.0623168	0.0329673	0.0594777	0.0382359	0.00857136	0.0805452	0.0809894	0.063446	0.0913264	0.0521879
			GLO: market for sodium hydroxide, without water, in 50% solution state ecoinvent 3.5				9.42909e-05	9.37089e-05	0.000139234	8.85107e-05	7.01349e-05	0.000129973	0.000107454	0.000101134	0.000132952	6.32676e-05	4.70716e-05	0.000107527	7.66405e-05	5.54309e-05	0.000117722	0.000118228	0.000222638	0.000102319	0.000206237
			GLO: market for steel, low-alloyed, hot rolled ecoinvent 3.5				0.0132472	0.0131706	0.0207859	0.0113428	0.00411745	0.05213	0.0238059	0.218629	0.0614413	0.00321181	0.00634678	0.0456332	0.00665818	0.150069	0.0193797	0.0186039	0.00869922	0.0129865	0.0937791
			GLO: market for wafer factory ecoinvent 3.5				0.00179689	0.00168203	0.00357185	0.00140382	0.000446058	0.010751	0.00428881	0.0107245	0.0156614	0.000502805	0.00470165	0.00950458	0.00340964	0.0153526	0.00283839	0.00277876	0.00171954	0.00377184	0.0321998
			GLO: market for waste, from silicon wafer production ecoinvent 3.5				6.51586e-05	5.39266e-05	8.12491e-05	5.4293e-05	1.07657e-05	5.29285e-05	4.77722e-05	0.000165872	4.41042e-05	7.86098e-06	0.000251135	6.06375e-05	2.39988e-05	0.000455701	0.000124143	0.000120493	4.25946e-05	6.49597e-05	0.000301035
			GLO: market for water, completely softened, from decarbonised water, at user ecoinvent 3.5				7.32544e-06	7.84738e-06	8.48314e-06	5.35119e-06	0.00823907	1.58728e-05	5.03354e-06	2.11011e-05	1.21916e-05	1.55612e-06	5.57425e-06	1.38211e-05	1.04696e-05	3.13613e-05	9.85897e-06	9.66967e-06	5.22737e-06	6.15006e-06	3.67932e-05
			GLO: market for wire drawing, steel ecoinvent 3.5				0.00212257	0.00204498	0.00238295	0.00155203	0.00321672	0.00678474	0.00194962	0.038541	0.00239993	0.000514718	0.00190956	0.00548443	0.00220253	0.00596698	0.00215963	0.00209556	0.00190834	0.00173095	0.00230243
			RER: hydrochloric acid production, from the reaction of hydrogen with chlorine ecoinvent 3.5				1.1985e-05	1.20664e-05	1.44845e-05	1.56854e-05	1.1397e-05	2.74828e-05	2.3029e-05	1.89771e-05	2.93062e-05	2.71634e-05	1.22137e-05	2.23814e-05	1.47369e-05	1.31719e-05	1.30701e-05	1.30712e-05	3.089e-05	1.68764e-05	4.01722e-05
			RER: market for acrylic binder, without water, in 34% solution state ecoinvent 3.5				1.32239e-05	1.31764e-05	1.26825e-05	2.07002e-05	8.94089e-06	1.58045e-05	1.05327e-05	1.40633e-05	2.20401e-05	7.75663e-06	8.45354e-06	1.37101e-05	5.27451e-06	9.65903e-06	1.49099e-05	1.42233e-05	9.49715e-06	1.3277e-05	3.30439e-05
			RER: market for dipropylene glycol monomethyl ether ecoinvent 3.5				0.00587057	0.00586468	0.00593533	0.00835185	0.00396354	0.00739366	0.00580466	0.00554593	0.00787888	0.00520689	0.00290528	0.00612503	0.00380966	0.00348929	0.00662312	0.0063169	0.00944642	0.00562598	0.0114876
			RER: market for silicon, single crystal, Czochralski process, photovoltaics ecoinvent 3.5				0.555729	0.56265	0.632956	0.620869	0.897554	0.651901	0.772164	0.561903	0.520539	0.869402	0.394586	0.501408	0.591609	0.0878106	0.533765	0.533823	0.660959	0.610187	0.314975
			RER: market for triethylene glycol ecoinvent 3.5				0.0158567	0.0158892	0.0106636	0.0294758	0.00791088	0.016658	0.0123137	0.0121936	0.0173082	0.0144107	0.00683061	0.0137574	0.00631179	0.00821578	0.0153553	0.0145246	0.0067086	0.0132466	0.0254076
		CN: A.02 - wafer packaging (007) <Mfg>					0.00585408	0.00474615	0.00413904	0.00813304	0.00310755	0.00363208	0.00171472	0.0031193	0.00200859	0.000949224	0.0293692	0.00306572	0.00255397	0.00166853	0.00647188	0.00620975	0.00201185	0.00471809	0.00487428
			GLO: market for packaging film, low density polyethylene ecoinvent 3.5				0.00138663	0.00134945	0.00100121	0.00243884	0.00054316	0.000805351	0.000333721	0.00090981	0.000391165	0.000302313	0.000946728	0.000690621	0.000383294	0.000127485	0.00167046	0.00156321	0.000313161	0.00116262	0.00110057
			GLO: market for polystyrene, high impact ecoinvent 3.5				0.00356814	0.00357154	0.0019364	0.00472437	0.00139896	0.00128374	0.000102177	0.00124328	0.0004109	1.35104e-05	9.66893e-05	0.00106283	0.000293412	0.000123762	0.00324397	0.00310686	0.000110642	0.00256008	0.00132942
			RER: paper production, woodfree, coated, at integrated mill ecoinvent 3.5				0.000899315	-0.000174834	0.00120142	0.000969832	0.00116543	0.00154299	0.00127883	0.000966211	0.00120652	0.000633401	0.0283257	0.00131227	0.00187727	0.00141728	0.00155745	0.00153968	0.00158805	0.000995399	0.00244429
		CN: A.03 - wafer transport (007) <Mfg>					0.00010662	0.000106311	0.000161566	9.98673e-05	9.29416e-06	6.53766e-05	2.06839e-05	4.98484e-05	6.73088e-05	1.50466e-05	0.000113814	0.00014211	1.5251e-05	4.5037e-05	0.000376295	0.000376166	0.000104655	0.000185731	0.00135237
			GLO: market group for transport, freight train ecoinvent 3.5				1.44373e-06	1.43663e-06	2.08651e-06	1.22078e-06	2.07243e-07	1.28414e-06	8.10114e-07	2.51808e-06	1.15692e-06	4.27679e-07	1.60207e-06	1.14514e-06	3.90188e-07	1.8034e-06	6.3707e-06	6.37735e-06	1.39173e-06	2e-06	2.84055e-06
			GLO: market group for transport, freight, lorry, unspecified ecoinvent 3.5				8.06797e-05	8.048e-05	7.42507e-05	7.67442e-05	6.95177e-06	5.60512e-05	1.32188e-05	3.68301e-05	5.98385e-05	8.9074e-06	0.000107206	0.000133713	1.10856e-05	3.43818e-05	0.000214636	0.000213494	7.8011e-05	7.27918e-05	0.001339
			GLO: transport, freight, sea, transoceanic ship ecoinvent 3.5				2.42677e-05	2.42181e-05	8.49389e-05	2.1719e-05	2.09167e-06	7.84523e-06	6.44626e-06	9.76243e-06	6.16069e-06	5.68645e-06	3.90528e-06	7.0763e-06	3.67386e-06	6.71897e-06	0.000154965	0.000155988	2.51312e-05	0.000110732	1.01357e-05
			RoW: treatment of waste, from silicon wafer production, underground deposit ecoinvent 3.5				2.29208e-07	1.75767e-07	2.89718e-07	1.83248e-07	4.34707e-08	1.96041e-07	2.08738e-07	7.37784e-07	1.52763e-07	2.50301e-08	1.10076e-06	1.7569e-07	1.01379e-07	2.1328e-06	3.23576e-07	3.06634e-07	1.21008e-07	2.06968e-07	3.96026e-07
	DE: B - cell (HJT) manufacturing [default] -rev5- (001) <Mfg>						0.0520638	0.0523051	0.0300254	0.0415978	0.0112467	0.113953	0.0688086	0.050618	0.243516	0.00947027	0.0901899	0.291074	0.0592212	0.325038	0.0572663	0.0573303	0.0755806	0.030467	0.0893942
		DE: B.01 - wafer cleaning/ texturing [HJT] (wet chemistry) -rev5- (001) <Mfg>					0.0123565	0.0122703	0.004998	0.0104929	0.0196358	0.00891279	0.00254938	0.00237297	0.00366331	0.00194936	0.0202692	0.0074211	0.00559991	0.00840928	0.00847288	0.00843165	0.0126775	0.00552767	0.00946216
			DE: Preparation of CellTex proxy <LC>				0.00064526	0.000643266	0.000422609	0.0011335	0.000228086	0.000355578	0.000602075	0.00035621	0.000416317	7.45207e-05	0.000410942	0.000409234	0.000297186	0.000325858	0.00106787	0.000996648	0.000273634	0.000480645	0.00212064
				DE: Sodium hydroxide (caustic soda) mix (100%) ts			4.64468e-05	4.61776e-05	1.28896e-05	3.75951e-05	4.78857e-06	4.23375e-07	3.8649e-07	3.59604e-07	1.2283e-06	3.25623e-06	6.78186e-05	7.27803e-07	2.08387e-05	2.95706e-05	4.00114e-05	4.02477e-05	4.13537e-05	1.62717e-05	8.90285e-06
				GLO: market for water, ultrapure ecoinvent 3.5			0.000138609	0.000138158	0.000154863	0.000126251	0.000105921	0.000105999	0.000225572	0.000132754	0.000104442	2.62652e-05	0.000170003	0.000182304	0.000214597	0.000101039	0.000456133	0.000455242	0.00013986	0.000150023	0.00150731
				RER: market for ethanol, without water, in 99.7% solution state, from ethylene ecoinvent 3.5			0.000460205	0.00045893	0.000254857	0.000969649	0.000117377	0.000249155	0.000376117	0.000223097	0.000310646	4.49992e-05	0.000173121	0.000226203	6.17499e-05	0.000195249	0.000571726	0.000501158	9.24204e-05	0.00031435	0.000604433
			DE: preparation of hydrogen chloride (36% in H2O) <Mfg>				4.86962e-06	4.8582e-06	1.76463e-06	5.86994e-06	9.2124e-07	7.56725e-07	1.46107e-06	8.92069e-07	9.8722e-07	2.93275e-07	3.69403e-06	1.34244e-06	2.57853e-06	3.5244e-06	5.41587e-06	5.37102e-06	4.95918e-06	1.969e-06	1.33747e-05
				DE: Hydrochloric acid mix (100%) ts			3.99181e-06	3.98324e-06	7.83877e-07	5.07039e-06	2.50444e-07	8.54303e-08	3.25213e-08	5.13369e-08	3.25786e-07	1.26937e-07	2.6174e-06	1.8791e-07	1.21948e-06	2.88452e-06	2.52717e-06	2.48796e-06	4.07344e-06	1.01891e-06	3.8289e-06
				GLO: market for water, ultrapure ecoinvent 3.5			8.77809e-07	8.74958e-07	9.80748e-07	7.99552e-07	6.70796e-07	6.71294e-07	1.42855e-06	8.40732e-07	6.61434e-07	1.66338e-07	1.07663e-06	1.15453e-06	1.35905e-06	6.39878e-07	2.8887e-06	2.88305e-06	8.85734e-07	9.501e-07	9.54579e-06
			DE: preparation of hydrogen fluoride (49% in H2O) <Mfg>				0.000178225	0.000176337	0.00058975	0.000273438	0.000264713	0.000369278	0.000199448	0.000225433	0.000533065	9.63494e-05	0.00015812	0.000365578	0.000102911	0.000310326	0.000353983	0.000352852	0.000168982	0.000775547	0.00132867
				GLO: market for water, ultrapure ecoinvent 3.5			5.99575e-06	5.97628e-06	6.69886e-06	5.46122e-06	4.58178e-06	4.58518e-06	9.7575e-06	5.7425e-06	4.51783e-06	1.13615e-06	7.35377e-06	7.88587e-06	9.28278e-06	4.3706e-06	1.97308e-05	1.96923e-05	6.04988e-06	6.48952e-06	6.52012e-05
				RER: market for hydrogen fluoride ecoinvent 3.5			0.000172229	0.000170361	0.000583051	0.000267977	0.000260131	0.000364693	0.000189691	0.00021969	0.000528548	9.52132e-05	0.000150767	0.000357693	9.36282e-05	0.000305956	0.000334252	0.00033316	0.000162932	0.000769058	0.00126347
			DE: preparation of potassium hydroxide (50% in H2O) <Mfg>				0.00161833	0.00161045	0.0020748	0.00150883	0.000423537	0.00204277	0.00161947	0.00155443	0.00232466	0.000807287	0.0011429	0.00172062	0.000820715	0.00115768	0.00189774	0.00190014	0.00153674	0.00169224	0.00361988
				GLO: market for potassium hydroxide ecoinvent 3.5			0.00160461	0.00159678	0.00205948	0.00149633	0.000413056	0.00203228	0.00159715	0.00154129	0.00231432	0.000804688	0.00112608	0.00170258	0.00079948	0.00114768	0.00185261	0.00185509	0.0015229	0.00167739	0.00347073
				GLO: market for water, ultrapure ecoinvent 3.5			1.37158e-05	1.36712e-05	1.53242e-05	1.2493e-05	1.04812e-05	1.0489e-05	2.23211e-05	1.31364e-05	1.03349e-05	2.59903e-06	1.68223e-05	1.80396e-05	2.12351e-05	9.9981e-06	4.51359e-05	4.50477e-05	1.38396e-05	1.48453e-05	0.000149153
			DE: X.03 - ultrapure water system -rev4- (001) <Mfg>				0.000727263	0.000725952	0.000145309	0.00055488	0.0176327	3.14242e-05	2.1896e-05	3.71603e-05	4.94451e-05	6.65737e-05	0.00132331	3.37574e-05	0.000485765	0.00304523	0.000382718	0.000385958	0.00104586	0.000190191	0.000212176
				CH: ion-exchanger production for water treatment ecoinvent 3.5			7.20821e-06	7.21101e-06	6.59826e-06	5.76508e-06	2.02636e-06	1.29531e-05	2.98893e-06	2.03187e-05	8.03722e-06	2.2071e-06	3.65087e-06	1.23879e-05	4.13327e-06	3.95021e-05	5.89024e-06	5.75636e-06	0.000237809	5.33041e-06	4.71641e-05
				DE: Electricity grid mix 1kV-60kV ts			0.000664884	0.000659593	0.000123191	0.000503995	7.50578e-05	4.83862e-06	5.36147e-06	4.46223e-06	1.44702e-05	6.28423e-05	0.00128412	9.7259e-06	0.000287308	0.000266052	0.00034066	0.000343855	0.000717444	0.000168065	0.000154026
				DE: Tap water from groundwater ts			5.51593e-05	5.9136e-05	1.55166e-05	4.51072e-05	0.0175556	1.36323e-05	1.35453e-05	1.23793e-05	2.69374e-05	1.51966e-06	3.55195e-05	1.16434e-05	0.00019432	0.00273967	3.61609e-05	3.6339e-05	9.06005e-05	1.67911e-05	1.09838e-05
				DE: X.03 - ultra pure water system -rev4- (001) ecoinvent 3.5 <u-so>			2.8458e-13	2.83889e-13	0	0	-5.09662e-14	0	1.99368e-10	0	0	0	0	0	2.06406e-10	0	0	0	0	0	0
				EU-28: Compressed air ts			1.23237e-08	1.22324e-08	3.53936e-09	1.30062e-08	3.24063e-09	1.0568e-10	6.43163e-11	1.03211e-10	2.65858e-10	4.63093e-09	1.76856e-08	2.00541e-10	3.94847e-09	3.4537e-09	6.94683e-09	7.0022e-09	8.61272e-09	4.81593e-09	2.57388e-09
			CH: treatment of waste plastic, industrial electronics, municipal incineration ecoinvent 3.5				7.42263e-05	7.40523e-05	2.08443e-06	5.66754e-07	5.74157e-07	0.00591902	1.21448e-06	4.51115e-05	0.000102313	2.38618e-07	3.38868e-07	0.00465497	1.63437e-05	9.38295e-07	1.0051e-05	1.00912e-05	3.52912e-05	2.5925e-06	2.19236e-06
			CH: treatment of waste polystyrene, municipal incineration ecoinvent 3.5				4.73792e-05	4.72662e-05	6.24037e-07	1.34084e-07	2.2667e-07	5.29084e-05	1.03374e-07	1.39906e-05	5.29429e-06	4.66002e-08	8.52871e-08	4.03388e-05	1.43968e-06	4.1639e-07	3.09246e-06	3.07978e-06	3.14956e-06	7.60859e-07	5.00085e-07
			DE: Electricity grid mix 1kV-60kV ts				0.00853097	0.00846309	0.00158064	0.00646664	0.00096305	6.20832e-05	6.87918e-05	5.72538e-05	0.000185664	0.000806315	0.0164763	0.000124791	0.00368638	0.00341365	0.00437093	0.00441193	0.00920536	0.0021564	0.00197627
			DE: Nitrogen (liquid) ts				0.000236821	0.000234943	4.3884e-05	0.000179516	2.78916e-05	1.72791e-06	1.91398e-06	1.59337e-06	5.16315e-06	2.23813e-05	0.000457344	3.46801e-06	0.000102395	9.49653e-05	0.000121356	0.000122494	0.000255545	5.98681e-05	5.48617e-05
			DE: Oxygen (liquid) ts				2.70933e-05	2.68782e-05	5.02028e-06	2.05374e-05	3.13787e-06	1.97475e-07	2.18771e-07	1.82106e-07	5.9027e-07	2.56062e-06	5.23241e-05	3.96581e-07	1.17117e-05	1.08552e-05	1.38828e-05	1.4013e-05	2.92354e-05	6.84889e-06	6.27641e-06
			EU-28: Compressed air ts				0.000126498	0.000125561	3.63302e-05	0.000133504	3.32639e-05	1.08477e-06	6.60182e-07	1.05942e-06	2.72893e-06	4.75347e-05	0.000181536	2.05848e-06	4.05295e-05	3.54509e-05	7.13065e-05	7.18749e-05	8.84063e-05	4.94337e-05	2.64199e-05
			GLO: market for packaging film, low density polyethylene ecoinvent 3.5				7.56575e-05	7.36287e-05	5.46281e-05	0.000133068	2.9636e-05	4.39416e-05	1.82085e-05	4.96411e-05	2.13428e-05	1.64948e-05	5.16555e-05	3.76817e-05	2.09133e-05	6.95587e-06	9.11436e-05	8.52921e-05	1.70867e-05	6.34348e-05	6.00492e-05
			GLO: market for polystyrene foam slab ecoinvent 3.5				6.38705e-05	6.39862e-05	4.05569e-05	8.23757e-05	2.80807e-05	3.2016e-05	1.39121e-05	3.0019e-05	1.57407e-05	8.76421e-06	1.06046e-05	2.68618e-05	1.10398e-05	3.43826e-06	8.33822e-05	7.19079e-05	1.32521e-05	4.77386e-05	4.08492e-05
		DE: B.02 - PECVD of a-Si:H (deposition thin film layer) -rev4- (001) <Mfg>					0.00776678	0.0077109	0.00159124	0.00610934	0.0147757	0.000275239	0.000310327	0.000249309	0.000390854	0.000985164	0.0130082	0.000292582	0.00324314	0.00494377	0.0039482	0.00397946	0.00742465	0.00206921	0.00182368
			GLO: preparation of phosphine [1% PH3 in H2] <Mfg>				7.51543e-07	7.46909e-07	8.6388e-07	1.13886e-06	3.23017e-07	6.84284e-07	4.48987e-06	6.01369e-07	5.69998e-07	4.99264e-07	4.61769e-07	5.39805e-07	4.93354e-07	5.40313e-06	8.20996e-07	8.10947e-07	6.44869e-07	6.89566e-07	5.56353e-07
				GLO: market for phosphane ecoinvent 3.5			4.37759e-07	4.32745e-07	7.13079e-07	5.04558e-07	1.43742e-07	5.25136e-07	4.38011e-06	4.58521e-07	4.42046e-07	3.69495e-07	4.06607e-07	4.11646e-07	4.03424e-07	5.35381e-06	5.76314e-07	5.79039e-07	4.54673e-07	5.05892e-07	3.91226e-07
				RER: market for hydrogen, liquid ecoinvent 3.5			3.13784e-07	3.14164e-07	1.508e-07	6.34306e-07	1.79275e-07	1.59148e-07	1.09761e-07	1.42848e-07	1.27953e-07	1.29768e-07	5.51615e-08	1.2816e-07	8.99304e-08	4.93149e-08	2.44682e-07	2.31909e-07	1.90197e-07	1.83674e-07	1.65127e-07
			RER: preparation of nitrogen trifluoride, at plant <Mfg>				1.89323e-05	1.8975e-05	1.61795e-05	2.31637e-05	9.03194e-06	1.7982e-05	1.6077e-05	1.21923e-05	1.56479e-05	2.57657e-05	2.22269e-05	1.46592e-05	1.19994e-05	7.65947e-06	1.56636e-05	1.5731e-05	1.72082e-05	2.1209e-05	2.14747e-05
				DE: Tap water from groundwater ts			2.00796e-09	2.15272e-09	5.6485e-10	1.64203e-09	6.39076e-07	4.96257e-10	4.93089e-10	4.50643e-10	9.80599e-10	5.53199e-11	1.29301e-09	4.23854e-10	7.0738e-09	9.97319e-08	1.31636e-09	1.32284e-09	3.29812e-09	6.11246e-10	3.99841e-10
				EU-28: Electricity grid mix 1kV-60kV ts			1.0091e-05	1.00161e-05	2.88794e-06	1.06283e-05	2.63785e-06	8.64666e-08	5.29662e-08	8.43984e-08	2.17614e-07	3.77313e-06	1.45479e-05	1.64042e-07	3.24656e-06	2.83791e-06	5.68035e-06	5.72565e-06	7.07449e-06	3.92963e-06	2.10831e-06
				GLO: market for chemical factory, organics ecoinvent 3.5			3.56341e-08	3.29697e-08	7.66141e-08	3.13342e-08	1.01326e-08	2.54973e-07	1.24933e-07	1.61001e-07	4.34567e-07	2.26299e-08	9.84034e-08	2.23118e-07	5.45347e-08	2.9053e-07	5.36881e-08	5.32817e-08	4.26699e-08	7.41424e-08	6.96769e-07
				GLO: market group for transport, freight, lorry, unspecified ecoinvent 3.5			1.54526e-08	1.54144e-08	1.42213e-08	1.46989e-08	1.33148e-09	1.07355e-08	2.53181e-09	7.05409e-09	1.14609e-08	1.70604e-09	2.05333e-08	2.56101e-08	2.12322e-09	6.58516e-09	4.11093e-08	4.08906e-08	1.49415e-08	1.39418e-08	2.56459e-07
				RENAMER | water (tap water) -> water, cooling, unspecified natural origin <u-so>			0	0	0	0	-4.2545e-07	0	0	0	0	0	0	0	0	0	0	0	0	0	0
				RENAMER | water (tap water) -> water, unspecified natural origin <u-so>			0	0	0	0	-2.12725e-07	0	0	0	0	0	0	0	0	0	0	0	0	0	0
				RER: market for ammonia, liquid ecoinvent 3.5			3.125e-07	3.1138e-07	2.11996e-07	3.70244e-07	2.58757e-07	1.06921e-07	5.58396e-08	7.49685e-08	1.54859e-07	4.14061e-08	4.17629e-08	1.86996e-07	9.46733e-08	1.28242e-07	1.81509e-07	1.78241e-07	2.753e-07	2.27074e-07	1.15238e-06
				RER: market for fluorine, liquid ecoinvent 3.5			8.43511e-06	8.5562e-06	1.28905e-05	1.20784e-05	5.66686e-06	1.67831e-05	1.57247e-05	1.12983e-05	1.431e-05	2.18931e-05	7.4699e-06	1.35171e-05	8.22136e-06	4.24192e-06	9.5719e-06	9.59789e-06	9.74782e-06	1.67471e-05	1.71762e-05
				RER: market group for heat, district or industrial, natural gas ecoinvent 3.5			2.39539e-09	2.38996e-09	2.87096e-10	2.50474e-09	2.74108e-11	1.78425e-10	6.81318e-11	1.78981e-10	9.20759e-11	6.97187e-11	3.80241e-11	4.25119e-10	3.9189e-11	1.45063e-10	8.36411e-10	8.17463e-10	1.33599e-09	3.62422e-10	1.34522e-10
				RER: market group for transport, freight train ecoinvent 3.5			3.30527e-08	3.30594e-08	4.47871e-08	3.3213e-08	8.02939e-09	3.37341e-08	2.91168e-08	6.55163e-08	3.27344e-08	3.20641e-08	4.4478e-08	2.98194e-08	1.50558e-08	4.37276e-08	1.25873e-07	1.25934e-07	3.42989e-08	4.7903e-08	6.83467e-08
				RER: preparation of nitrogen trifluoride, at plant <u-so>			0	0	4.67995e-08	0	6.38175e-07	0	0	0	0	0	0	0	0	0	0	0	0	1.63003e-07	0
				RoW: treatment of wastewater from wafer fabrication, capacity 1.1E10l/year ecoinvent 3.5			5.1131e-09	5.26175e-09	5.87033e-09	3.30836e-09	-1.90115e-07	7.0537e-07	8.6384e-08	5.00422e-07	4.85638e-07	1.50459e-09	2.5471e-09	5.11689e-07	3.57933e-07	1.06903e-08	7.03166e-09	7.00525e-09	1.40567e-08	5.25416e-09	1.57347e-08
			RER: preparation of silane (silicon tetrahydride) <Mfg>				0.000187372	0.000189296	0.000133892	0.000207511	8.10516e-05	0.000113182	0.000161423	0.000116874	0.000109593	0.000216916	0.00017104	9.66381e-05	9.97269e-05	3.00931e-05	0.000146935	0.000145878	0.000159122	0.000150152	8.30582e-05
				DE: market for silicon tetrachloride ecoinvent 3.5			3.66813e-06	3.84239e-06	2.41557e-06	3.64257e-06	2.44353e-05	4.21259e-06	8.1535e-06	4.68814e-06	4.39008e-06	3.79462e-06	2.68401e-06	3.26359e-06	3.95997e-06	4.37788e-07	2.34108e-06	2.32947e-06	5.1071e-06	4.15819e-06	1.2955e-06
				EU-28: Electricity grid mix 1kV-60kV ts			2.67836e-05	2.65848e-05	7.66515e-06	2.82097e-05	7.00137e-06	2.29499e-07	1.40583e-07	2.2401e-07	5.7759e-07	1.00146e-05	3.8613e-05	4.35401e-07	8.61701e-06	7.53236e-06	1.50768e-05	1.5197e-05	1.87771e-05	1.043e-05	5.59586e-06
				GLO: market for silicone factory ecoinvent 3.5			3.81815e-08	3.43702e-08	5.34469e-08	2.87728e-08	1.01654e-08	9.88049e-08	3.87755e-08	1.15279e-07	1.02201e-07	1.11765e-08	2.874e-07	8.69991e-08	4.08509e-08	1.63163e-07	6.6619e-08	6.54716e-08	3.00212e-08	6.1253e-08	2.12531e-07
				GLO: market group for transport, freight, lorry, unspecified ecoinvent 3.5			2.84711e-07	2.84006e-07	2.62023e-07	2.70823e-07	2.45321e-08	1.97799e-07	4.66479e-08	1.2997e-07	2.11164e-07	3.14333e-08	3.78321e-07	4.7186e-07	3.91199e-08	1.2133e-07	7.57428e-07	7.53398e-07	2.75293e-07	2.56875e-07	4.72519e-06
				RER: market for hydrogen, liquid ecoinvent 3.5			5.19616e-07	5.20246e-07	2.49721e-07	1.05039e-06	2.96873e-07	2.63544e-07	1.81761e-07	2.36552e-07	2.11885e-07	2.14892e-07	9.13457e-08	2.12228e-07	1.48922e-07	8.16639e-08	4.05185e-07	3.84033e-07	3.1496e-07	3.04158e-07	2.73445e-07
				RER: market for lime, hydrated, packed ecoinvent 3.5			1.21434e-06	1.21849e-06	2.1978e-07	3.20343e-07	4.95371e-08	9.4584e-08	3.40493e-08	5.75331e-08	6.42643e-08	1.32151e-07	5.07426e-07	1.05463e-07	3.71517e-08	3.97321e-08	3.74644e-07	3.69974e-07	2.69668e-07	2.64722e-07	3.90191e-07
				RER: market for nitrogen, liquid ecoinvent 3.5			4.27006e-06	4.35761e-06	4.67253e-06	5.97887e-06	6.19392e-06	8.12515e-06	8.54537e-06	5.65707e-06	5.4957e-06	1.29742e-05	3.74777e-06	6.21391e-06	4.51062e-06	6.7858e-07	4.17335e-06	4.19537e-06	5.12396e-06	6.00216e-06	3.55737e-06
				RER: market group for heat, district or industrial, natural gas ecoinvent 3.5			2.79635e-05	2.79002e-05	3.35153e-06	2.92401e-05	3.19991e-07	2.08292e-06	7.95365e-07	2.08941e-06	1.07489e-06	8.1389e-07	4.4389e-07	4.9628e-06	4.57489e-07	1.69345e-06	9.76419e-06	9.54299e-06	1.55962e-05	4.23089e-06	1.5704e-06
				RER: market group for transport, freight train ecoinvent 3.5			6.0873e-07	6.08853e-07	8.24842e-07	6.11681e-07	1.47877e-07	6.2128e-07	5.36243e-07	1.20661e-06	6.02868e-07	5.90523e-07	8.1915e-07	5.49182e-07	2.77283e-07	8.05329e-07	2.31819e-06	2.31932e-06	6.31681e-07	8.82227e-07	1.25874e-06
				RER: preparation of silane (silicon tetrahydride) <u-so>			0	0	0	0	0	4.80224e-08	1.02132e-08	1.10614e-09	4.2463e-08	0	0	3.44448e-08	3.29492e-06	0	0	0	0	0	7.04335e-26
				RER: silicon production, solar grade, modified Siemens process ecoinvent 3.5			0.000122021	0.000123945	0.000114177	0.000138158	4.25721e-05	9.72078e-05	0.000142941	0.000102468	9.68195e-05	0.000188339	0.000123467	8.03022e-05	7.83436e-05	1.85397e-05	0.000111658	0.000110721	0.000112996	0.000123561	6.4179e-05
			DE: Argon (liquid) ts				2.07137e-06	2.05492e-06	3.83817e-07	1.57015e-06	2.39893e-07	1.50976e-08	1.67257e-08	1.39225e-08	4.5128e-08	1.95768e-07	4.00034e-06	3.03199e-08	8.95393e-07	8.29913e-07	1.06139e-06	1.07134e-06	2.23514e-06	5.2362e-07	4.79852e-07
			DE: Electricity grid mix 1kV-60kV ts				0.00580106	0.0057549	0.00107483	0.00439732	0.000654874	4.22166e-05	4.67784e-05	3.89326e-05	0.000126251	0.000548294	0.0112039	8.48577e-05	0.00250674	0.00232128	0.00297224	0.00300011	0.00625964	0.00146635	0.00134386
			DE: Tap water from groundwater ts				0.000173797	0.000186327	4.889e-05	0.000142124	0.0553145	4.2953e-05	4.26788e-05	3.9005e-05	8.48747e-05	4.78816e-06	0.000111915	3.66863e-05	0.000612265	0.00863219	0.000113936	0.000114497	0.000285465	5.29057e-05	3.46078e-05
			DE: Tap water from groundwater ts				-0.000130347	-0.000139745	-3.66675e-05	-0.000106593	-0.0414859	-3.22147e-05	-3.20091e-05	-2.92537e-05	-6.3656e-05	-3.59112e-06	-8.39366e-05	-2.75147e-05	-0.000459199	-0.00647414	-8.54522e-05	-8.58729e-05	-0.000214099	-3.96793e-05	-2.59558e-05
			EU-28: Compressed air ts				0.000195169	0.000193722	5.60523e-05	0.000205978	5.13214e-05	1.67364e-06	1.01857e-06	1.63454e-06	4.21034e-06	7.33393e-05	0.000280084	3.17594e-06	6.25312e-05	5.46956e-05	0.000110016	0.000110893	0.000136398	7.62691e-05	4.07622e-05
			GLO: market for diborane ecoinvent 3.5				6.0154e-05	5.9742e-05	9.7933e-05	6.51669e-05	2.76551e-05	7.94952e-05	6.19805e-05	5.67591e-05	9.2757e-05	3.32617e-05	2.64702e-05	6.74363e-05	3.1711e-05	0.000100581	7.93471e-05	7.93015e-05	6.65372e-05	8.54152e-05	0.000140535
			NL: Nitrogen (liquid) ts				0.00145254	0.0014396	0.000196337	0.00116129	0.000119555	6.57254e-06	6.02533e-06	1.01454e-05	1.84073e-05	8.35101e-05	0.00127112	1.39157e-05	0.000374464	0.00026435	0.000589517	0.000593137	0.000708294	0.000252285	0.000181519
			RER: market for hydrogen, liquid ecoinvent 3.5				5.28255e-06	5.28896e-06	2.53873e-06	1.06786e-05	3.01809e-06	2.67926e-06	1.84783e-06	2.40485e-06	2.15408e-06	2.18465e-06	9.28645e-07	2.15757e-06	1.51398e-06	8.30217e-07	4.11922e-06	3.90418e-06	3.20197e-06	3.09215e-06	2.77992e-06
		DE: B.03 - sputter FS: ITO (indium-tin-oxide) [HJT] -rev5- (001) <Mfg>					0.00125373	0.00124511	0.000423079	0.000969225	0.00242058	0.000423972	0.000255204	0.000178468	0.00112629	0.000175863	0.00224362	0.000658572	0.000615194	0.00253486	0.000805232	0.000806093	0.00138143	0.00052116	0.00472908
			DE: Argon (liquid) ts				7.33748e-07	7.27922e-07	1.35961e-07	5.56199e-07	8.49779e-08	5.34807e-09	5.92479e-09	4.93182e-09	1.59858e-08	6.93473e-08	1.41705e-06	1.07403e-08	3.17178e-07	2.93983e-07	3.75978e-07	3.79504e-07	7.91759e-07	1.85483e-07	1.69979e-07
			DE: Electricity grid mix 1kV-60kV ts				0.00107234	0.00106381	0.000198686	0.000812858	0.000121056	7.80387e-06	8.64714e-06	7.19682e-06	2.3338e-05	0.000101354	0.00207108	1.56862e-05	0.000463379	0.000429096	0.000549427	0.00055458	0.00115712	0.00027106	0.000248417
			DE: Nitrogen (liquid) ts				4.73641e-05	4.69886e-05	8.77681e-06	3.59033e-05	5.57832e-06	3.45581e-07	3.82797e-07	3.18675e-07	1.03263e-06	4.47627e-06	9.14688e-05	6.93602e-07	2.0479e-05	1.89931e-05	2.42712e-05	2.44988e-05	5.11091e-05	1.19736e-05	1.09723e-05
			DE: Oxygen (liquid) ts				7.52593e-09	7.46617e-09	1.39452e-09	5.70483e-09	8.7163e-10	5.48543e-11	6.07696e-11	5.05849e-11	1.63964e-10	7.11283e-10	1.45345e-08	1.10162e-10	3.25324e-09	3.01533e-09	3.85634e-09	3.8925e-09	8.12094e-09	1.90247e-09	1.74345e-09
			DE: Tap water from groundwater ts				2.82925e-05	3.03322e-05	7.95883e-06	2.31365e-05	0.00900469	6.99234e-06	6.94772e-06	6.34964e-06	1.38168e-05	7.79467e-07	1.82188e-05	5.97218e-06	9.9671e-05	0.00140524	1.85478e-05	1.86391e-05	4.64711e-05	8.61256e-06	5.63382e-06
			DE: Tap water from groundwater ts				-2.12193e-05	-2.27492e-05	-5.96913e-06	-1.73524e-05	-0.00675352	-5.24426e-06	-5.21079e-06	-4.76223e-06	-1.03626e-05	-5.846e-07	-1.36641e-05	-4.47914e-06	-7.47533e-05	-0.00105393	-1.39108e-05	-1.39793e-05	-3.48533e-05	-6.45942e-06	-4.22537e-06
			EU-28: Compressed air ts				1.08427e-05	1.07624e-05	3.11401e-06	1.14432e-05	2.85119e-06	9.29802e-08	5.65871e-08	9.08076e-08	2.33908e-07	4.07441e-06	1.55602e-05	1.76441e-07	3.47396e-06	3.03865e-06	6.11199e-06	6.16071e-06	7.57768e-06	4.23717e-06	2.26456e-06
			RER: market for indium tin oxide powder, nanoscale, for sputtering target ecoinvent 3.5				0.000115361	0.000115226	0.000210375	0.000102674	3.98331e-05	0.000413976	0.000244374	0.00016927	0.00109822	6.56931e-05	5.95298e-05	0.000640512	0.000102624	0.00173212	0.000220405	0.00021581	0.000153208	0.000231549	0.00446584
		DE: B.04 - sputter RS: ITO (indium-tin-oxide) -rev4- (001) <Mfg>					0.0110727	0.0109911	0.00225841	0.008445	0.0237971	0.000510825	0.000349223	0.000258388	0.00136967	0.0011271	0.0210771	0.00081487	0.00504399	0.00958851	0.0058502	0.00589812	0.0119754	0.00301988	0.00699942
			DE: Argon (liquid) ts				7.33748e-06	7.27922e-06	1.35961e-06	5.56199e-06	8.49779e-07	5.34807e-08	5.92479e-08	4.93182e-08	1.59858e-07	6.93473e-07	1.41705e-05	1.07403e-07	3.17178e-06	2.93983e-06	3.75978e-06	3.79504e-06	7.91759e-06	1.85483e-06	1.69979e-06
			DE: Electricity grid mix 1kV-60kV ts				0.0107234	0.0106381	0.00198686	0.00812858	0.00121056	7.80387e-05	8.64714e-05	7.19682e-05	0.00023338	0.00101354	0.0207108	0.000156862	0.00463379	0.00429096	0.00549427	0.0055458	0.0115712	0.0027106	0.00248417
			DE: Nitrogen (liquid) ts				4.73641e-05	4.69886e-05	8.77681e-06	3.59033e-05	5.57832e-06	3.45581e-07	3.82797e-07	3.18675e-07	1.03263e-06	4.47627e-06	9.14688e-05	6.93602e-07	2.0479e-05	1.89931e-05	2.42712e-05	2.44988e-05	5.11091e-05	1.19736e-05	1.09723e-05
			DE: Oxygen (liquid) ts				7.52593e-09	7.46617e-09	1.39452e-09	5.70483e-09	8.7163e-10	5.48543e-11	6.07696e-11	5.05849e-11	1.63964e-10	7.11283e-10	1.45345e-08	1.10162e-10	3.25324e-09	3.01533e-09	3.85634e-09	3.8925e-09	8.12094e-09	1.90247e-09	1.74345e-09
			DE: Tap water from groundwater ts				0.000282925	0.000303322	7.95883e-05	0.000231365	0.0900469	6.99234e-05	6.94772e-05	6.34964e-05	0.000138168	7.79467e-06	0.000182188	5.97218e-05	0.00099671	0.0140524	0.000185478	0.000186391	0.000464711	8.61256e-05	5.63382e-05
			DE: Tap water from groundwater ts				-0.000212193	-0.000227492	-5.96913e-05	-0.000173524	-0.0675352	-5.24426e-05	-5.21079e-05	-4.76223e-05	-0.000103626	-5.846e-06	-0.000136641	-4.47914e-05	-0.000747533	-0.0105393	-0.000139108	-0.000139793	-0.000348533	-6.45942e-05	-4.22537e-05
			EU-28: Compressed air ts				0.000108427	0.000107624	3.11401e-05	0.000114432	2.85119e-05	9.29802e-07	5.65871e-07	9.08076e-07	2.33908e-06	4.07441e-05	0.000155602	1.76441e-06	3.47396e-05	3.03865e-05	6.11199e-05	6.16071e-05	7.57768e-05	4.23717e-05	2.26456e-05
			RER: market for indium tin oxide powder, nanoscale, for sputtering target ecoinvent 3.5				0.000115361	0.000115226	0.000210375	0.000102674	3.98331e-05	0.000413976	0.000244374	0.00016927	0.00109822	6.56931e-05	5.95298e-05	0.000640512	0.000102624	0.00173212	0.000220405	0.00021581	0.000153208	0.000231549	0.00446584
		DE: B.10 - contact formation/ metallization (Ag-fingers) [HJT] -rev5- (001) <Mfg>					0.0114664	0.0113032	0.0181784	0.00977965	0.00191471	0.101044	0.062729	0.0442544	0.231818	0.00426487	0.0226261	0.279445	0.0117358	0.296019	0.0315947	0.0315532	0.0249177	0.0158388	0.0599118
			DE: manufacturing of printing screens (application of ag-fingers) <Mfg>				0.00181252	0.00181333	0.00407956	0.00152306	0.000341519	0.00877527	0.00140856	0.0136364	0.00277238	0.000511936	0.00137775	0.00886431	0.000747111	0.0381134	0.00251093	0.0024741	0.00119844	0.00208422	0.0427887
				DE: Aluminium frame profile, powder coated (EN15804 A1-A3) ts			7.26622e-05	7.2564e-05	3.48908e-05	5.97819e-05	1.58618e-05	1.47834e-06	5.09257e-07	1.20016e-06	2.92889e-06	1.04988e-05	3.5663e-05	2.28021e-06	1.99796e-05	7.90343e-05	5.3261e-05	5.36551e-05	3.41415e-05	4.64127e-05	1.28187e-05
				RER: market for adhesive, for metal ecoinvent 3.5			5.03535e-05	5.00574e-05	4.47234e-05	6.10918e-05	1.70431e-05	0.000142349	3.57102e-05	3.90286e-05	5.83652e-05	1.8893e-05	2.22027e-05	4.44921e-05	1.89928e-05	3.02587e-05	5.36696e-05	5.03307e-05	3.26259e-05	4.00426e-05	0.00010435
				RER: steel production, chromium steel 18/8, hot rolled ecoinvent 3.5			0.0016895	0.00169071	0.00399995	0.00140219	0.000308614	0.00863144	0.00137234	0.0135961	0.00271109	0.000482544	0.00131988	0.00881754	0.000708139	0.0380041	0.002404	0.00237011	0.00113167	0.00199776	0.0426715
			RER: preparation of Ag-paste (95% Ag, 5% unknown solvent) <Mfg>				0.00638992	0.00625168	0.0134911	0.00567974	0.00115325	0.0917989	0.0613805	0.0306345	0.229341	0.0033496	0.0151108	0.270243	0.00965546	0.256779	0.0273941	0.0273739	0.020334	0.0129233	0.0169798
				EU-28: Electricity grid mix 1kV-60kV ts			1.93993e-06	1.92554e-06	5.55186e-07	2.04322e-06	5.07108e-07	1.66226e-08	1.01824e-08	1.6225e-08	4.18348e-08	7.25359e-07	2.79674e-06	3.1536e-08	6.2413e-07	5.45568e-07	1.09201e-06	1.10072e-06	1.36002e-06	7.55444e-07	4.05308e-07
				GLO: market for chemical, organic ecoinvent 3.5			9.70101e-07	9.65937e-07	8.20692e-07	1.85879e-06	5.796e-07	5.99994e-07	4.31771e-07	5.52825e-07	6.19465e-07	1.6213e-07	2.04908e-07	5.19282e-07	2.69218e-07	2.9472e-07	1.19449e-06	1.07289e-06	4.44249e-07	7.9803e-07	1.15327e-06
				GLO: market for silver ecoinvent 3.5			0.00637525	0.00623705	0.0134399	0.00566475	0.00114787	0.0917862	0.0613705	0.0306143	0.229329	0.003341	0.0150929	0.270233	0.00964945	0.256141	0.0273541	0.027334	0.0203049	0.012866	0.0169638
				GLO: market for solder factory ecoinvent 3.5			9.66874e-10	8.27894e-10	1.23117e-09	6.56425e-10	2.34479e-10	1.97285e-09	5.48312e-10	1.9531e-09	1.31319e-09	1.54496e-10	1.18587e-08	1.7297e-09	1.15421e-09	3.20365e-09	1.56857e-09	1.53618e-09	6.26575e-10	1.65431e-09	4.04933e-09
				GLO: market for tin ecoinvent 3.5			1.04082e-05	1.03926e-05	4.92312e-05	9.72122e-06	4.23879e-06	1.15709e-05	9.43507e-06	1.92505e-05	1.08077e-05	7.59174e-06	1.41989e-05	9.09223e-06	5.01799e-06	0.000637402	3.60253e-05	3.59837e-05	2.62802e-05	5.51485e-05	6.81052e-06
				RER: market for transport, freight, inland waterways, barge ecoinvent 3.5			1.9767e-08	1.98007e-08	2.5604e-08	1.66764e-08	2.42315e-09	7.1545e-09	5.20675e-09	1.38206e-08	6.38063e-09	5.59329e-09	2.29855e-08	6.90296e-09	3.69159e-09	1.50156e-08	1.11532e-07	1.12094e-07	4.40561e-08	3.03273e-08	1.95479e-08
				RER: market for transport, freight, lorry, unspecified ecoinvent 3.5			4.47019e-07	4.45934e-07	4.09094e-07	4.26119e-07	3.90697e-08	3.12003e-07	7.3966e-08	2.05138e-07	3.32646e-07	5.32128e-08	5.9803e-07	7.44024e-07	6.19045e-08	1.91674e-07	1.19156e-06	1.18519e-06	4.33275e-07	4.0272e-07	7.44938e-06
				RER: market group for heat, district or industrial, natural gas ecoinvent 3.5			8.43199e-07	8.41287e-07	1.01061e-07	8.81691e-07	9.64885e-09	6.28072e-08	2.3983e-08	6.30031e-08	3.24116e-08	2.45416e-08	1.33848e-08	1.49646e-07	1.37949e-08	5.10634e-08	2.94424e-07	2.87755e-07	4.70281e-07	1.27576e-07	4.73531e-08
				RER: market group for transport, freight train ecoinvent 3.5			4.09143e-08	4.09225e-08	5.54397e-08	4.11126e-08	9.93918e-09	4.17578e-08	3.60422e-08	8.10993e-08	4.05203e-08	3.96905e-08	5.50571e-08	3.69119e-08	1.86369e-08	5.41282e-08	1.55811e-07	1.55887e-07	4.24569e-08	5.92967e-08	8.46029e-08
			DE: Electricity grid mix 1kV-60kV ts				0.0029249	0.00290163	0.000541932	0.00221713	0.000330188	2.12857e-05	2.35858e-05	1.96299e-05	6.36561e-05	0.000276451	0.00564902	4.27854e-05	0.0012639	0.00117039	0.00149861	0.00151266	0.00315612	0.000739337	0.000677577
			EU-28: Compressed air ts				0.000337931	0.000335427	9.70534e-05	0.000356647	8.88621e-05	2.89788e-06	1.76363e-06	2.83017e-06	7.29013e-06	0.000126986	0.000484959	5.49908e-06	0.000108272	9.47045e-05	0.00019049	0.000192009	0.000236171	0.000132058	7.05789e-05
			Europe without Switzerland: market for scrap steel ecoinvent 3.5				2.9442e-06	2.9395e-06	4.14785e-06	4.47996e-06	1.8283e-06	0.000572136	7.76471e-07	5.75199e-06	5.46413e-06	6.16581e-07	8.09059e-06	0.000408982	5.31099e-07	1.4804e-06	1.10204e-05	1.09565e-05	4.03393e-06	4.00195e-06	1.94749e-05
			GLO: market for anode slime, silver and tellurium containing stockpiling ecoinvent 3.5				-2.13745e-06	-2.08367e-06	-3.57555e-05	-1.71937e-06	-1.03101e-06	-0.000127895	-8.63527e-05	-4.49339e-05	-0.000372867	-8.27221e-07	-5.10988e-06	-0.000120518	-3.95751e-05	-0.000140499	-1.11291e-05	-1.10836e-05	-1.13057e-05	-4.45213e-05	-0.000624925
			GLO: market for waste aluminium ecoinvent 3.5				2.9925e-07	3.00633e-07	3.99679e-07	3.04124e-07	9.23283e-08	1.51418e-06	1.94633e-07	2.5681e-07	1.56066e-06	1.02889e-07	6.25787e-07	1.13019e-06	1.07719e-07	1.07935e-07	6.24546e-07	6.22509e-07	2.62649e-07	3.55349e-07	6.08488e-07
		DE: B.11 - curing (module) [HJT] -rev5- (001) <Mfg>					0.00114144	0.00113258	0.000253297	0.000987218	0.000190417	8.83917e-06	8.03731e-06	8.34303e-06	2.47635e-05	0.000223261	0.00200095	1.73717e-05	0.000447407	0.000407561	0.000605888	0.000611245	0.00107572	0.00034514	0.00025507
			DE: Electricity grid mix 1kV-60kV ts				0.000731226	0.000725407	0.000135483	0.000554283	8.25471e-05	5.32142e-06	5.89644e-06	4.90747e-06	1.5914e-05	6.91127e-05	0.00141225	1.06964e-05	0.000315976	0.000292598	0.000374651	0.000378165	0.000789031	0.000184834	0.000169394
			EU-28: Compressed air ts				0.000410216	0.000407176	0.000117814	0.000432935	0.00010787	3.51775e-06	2.14088e-06	3.43555e-06	8.84952e-06	0.000154148	0.000588694	6.67535e-06	0.000131431	0.000114962	0.000231237	0.00023308	0.000286689	0.000160306	8.5676e-05
		DE: B.12 - test [HJT] -rev5- (001) <Mfg>					0.000846602	0.000839869	0.00015744	0.000643434	9.64261e-05	6.16844e-06	6.81061e-06	5.69127e-06	1.84239e-05	8.16187e-05	0.00163226	1.23934e-05	0.000365196	0.000338083	0.000434058	0.000438124	0.000911364	0.000214784	0.000195992
			DE: Electricity grid mix 1kV-60kV ts				0.00084091	0.000834218	0.000155806	0.000637426	9.49292e-05	6.11963e-06	6.7809e-06	5.64359e-06	1.83011e-05	7.94796e-05	0.00162409	1.23008e-05	0.000363372	0.000336488	0.000430849	0.00043489	0.000907386	0.000212559	0.000194803
			EU-28: Compressed air ts				5.69242e-06	5.65024e-06	1.63486e-06	6.00768e-06	1.49687e-06	4.88146e-08	2.97082e-08	4.7674e-08	1.22802e-07	2.13906e-06	8.1691e-06	9.26315e-08	1.82383e-06	1.59529e-06	3.20879e-06	3.23437e-06	3.97828e-06	2.22451e-06	1.1889e-06
		DE: external waste water treatment [drain acid - X.02] -rev4- (001) <LC>					5.12915e-06	5.13826e-06	4.49267e-06	4.55289e-06	-1.0957e-05	3.85831e-06	1.25262e-05	2.83344e-06	3.97845e-06	1.30197e-06	6.12411e-06	7.98625e-06	0.000242829	2.80252e-06	1.23849e-05	1.23207e-05	9.29959e-06	4.52655e-06	7.48202e-05
			CH: treatment of wastewater from PV cell production, capacity 5E9l/year ecoinvent 3.5				7.07553e-07	7.27606e-07	4.23415e-07	3.46977e-07	-1.1338e-05	7.8646e-07	1.18017e-05	8.14988e-07	6.99048e-07	8.13807e-07	2.48734e-07	6.58203e-07	0.000242222	9.18248e-07	6.21913e-07	6.20275e-07	5.02425e-06	5.37247e-07	1.43728e-06
			GLO: market group for transport, freight, lorry, unspecified ecoinvent 3.5				4.4216e-06	4.41065e-06	4.06926e-06	4.20591e-06	3.80987e-07	3.07185e-06	7.24448e-07	2.01845e-06	3.27941e-06	4.88164e-07	5.87537e-06	7.32805e-06	6.07537e-07	1.88427e-06	1.1763e-05	1.17004e-05	4.27534e-06	3.9893e-06	7.33829e-05
		DE: X.01 - exhaust abatement [HJT - defaul] -rev5- (001) <Mfg>					0.00148456	0.00147936	0.000450838	0.000926015	0.00108881	5.75932e-06	3.42556e-06	4.88425e-06	1.14163e-05	9.68461e-05	0.000627054	9.76847e-06	0.000151811	0.000313566	0.00258748	0.00262229	0.000362753	0.00062479	0.000110665
			DE: X.03 - ultrapure water system -rev4- (001) <Mfg>				4.19625e-05	4.18869e-05	8.38424e-06	3.20161e-05	0.00101739	1.81315e-06	1.26338e-06	2.14412e-06	2.85294e-06	3.84125e-06	7.63541e-05	1.94778e-06	2.80283e-05	0.000175707	2.20826e-05	2.22695e-05	6.03454e-05	1.09739e-05	1.22424e-05
				CH: ion-exchanger production for water treatment ecoinvent 3.5			4.15908e-07	4.1607e-07	3.80715e-07	3.32641e-07	1.16919e-07	7.47385e-07	1.72459e-07	1.17237e-06	4.63742e-07	1.27348e-07	2.10652e-07	7.14773e-07	2.38486e-07	2.27924e-06	3.39863e-07	3.32138e-07	1.37214e-05	3.0756e-07	2.72133e-06
				DE: Electricity grid mix 1kV-60kV ts			3.83633e-05	3.8058e-05	7.10803e-06	2.90801e-05	4.33078e-06	2.79184e-07	3.09353e-07	2.57467e-07	8.34919e-07	3.62595e-06	7.4093e-05	5.61177e-07	1.65774e-05	1.5351e-05	1.96558e-05	1.98402e-05	4.1396e-05	9.6972e-06	8.88715e-06
				DE: Tap water from groundwater ts			3.18265e-06	3.4121e-06	8.95297e-07	2.60265e-06	0.00101295	7.86576e-07	7.81556e-07	7.14278e-07	1.55427e-06	8.7683e-08	2.04945e-06	6.71817e-07	1.12121e-05	0.000158077	2.08646e-06	2.09673e-06	5.22758e-06	9.68835e-07	6.33754e-07
				DE: X.03 - ultra pure water system -rev4- (001) ecoinvent 3.5 <u-so>			1.642e-14	1.63802e-14	0	0	-2.94071e-15	0	1.15034e-11	0	0	0	0	0	1.19095e-11	0	0	0	0	0	0
				EU-28: Compressed air ts			7.11069e-10	7.058e-10	2.04218e-10	7.5045e-10	1.86982e-10	6.09768e-12	3.711e-12	5.9552e-12	1.53398e-11	2.67201e-10	1.02044e-09	1.15711e-11	2.27823e-10	1.99276e-10	4.00827e-10	4.04021e-10	4.96947e-10	2.77875e-10	1.48511e-10
			DE: Electricity grid mix 1kV-60kV ts				0.000121707	0.000120739	2.25502e-05	9.22566e-05	1.37394e-05	8.85713e-07	9.81421e-07	8.16814e-07	2.64878e-06	1.15033e-05	0.00023506	1.78033e-06	5.25919e-05	4.8701e-05	6.23581e-05	6.2943e-05	0.000131329	3.07644e-05	2.81945e-05
			DE: emission, direct [default] -rev4- [X.01] <u-so>				0.001016	0.00101353	0.00033407	0	0	0	0	0	0	0	0	0	0	0	0.00232837	0.00236211	0	0.00046629	0
			DE: Natural gas mix ts				8.83244e-05	8.82468e-05	2.36366e-05	0.000573185	7.28102e-07	1.20334e-06	5.05343e-08	1.096e-07	1.24268e-06	1.22755e-07	4.85327e-06	2.51627e-06	1.80495e-06	2.84665e-05	5.25975e-05	5.19209e-05	1.97286e-05	3.2132e-05	2.49975e-05
			EU-28: Compressed air ts				0.000216563	0.000214958	6.21967e-05	0.000228557	5.69473e-05	1.85711e-06	1.13022e-06	1.81372e-06	4.67188e-06	8.13788e-05	0.000310786	3.52409e-06	6.93859e-05	6.06914e-05	0.000122076	0.000123049	0.00015135	8.46297e-05	4.52305e-05
		DE: X.02 - tray cleaning -rev5- (001) <Mfg>					0.000864258	0.000857807	0.000376199	0.000761743	0.00011347	1.05562e-05	7.2646e-06	7.19964e-06	3.11838e-05	7.26102e-05	0.00145987	2.11657e-05	0.000339913	0.00182411	0.00053659	0.000540556	0.00086465	0.000520702	0.000229316
			DE: preparation of phosphoric acid (85% H3PO4) <Mfg>				0.000132968	0.00013233	0.000240698	0.000207407	1.03403e-05	5.21879e-06	1.35229e-06	2.27765e-06	1.52382e-05	3.49573e-06	4.75754e-05	1.04557e-05	2.371e-05	0.0015283	0.000161896	0.000162348	7.55126e-05	0.000335848	5.9909e-05
				DE: Phosphoric acid (100%) (wet process) ts			0.000132674	0.000132037	0.00024037	0.000207139	1.01157e-05	4.99403e-06	8.73978e-07	1.99616e-06	1.50167e-05	3.44003e-06	4.7215e-05	1.00692e-05	2.3255e-05	0.00152808	0.000160929	0.000161383	7.5216e-05	0.00033553	5.67129e-05
				GLO: market for water, ultrapure ecoinvent 3.5			2.93909e-07	2.92955e-07	3.28375e-07	2.67707e-07	2.24597e-07	2.24764e-07	4.78309e-07	2.81495e-07	2.21462e-07	5.56936e-08	3.60479e-07	3.86562e-07	4.55038e-07	2.14245e-07	9.67198e-07	9.65308e-07	2.96563e-07	3.18114e-07	3.19614e-06
			DE: Electricity grid mix 1kV-60kV ts				0.000731226	0.000725407	0.000135483	0.000554283	8.25471e-05	5.32142e-06	5.89644e-06	4.90747e-06	1.5914e-05	6.91127e-05	0.00141225	1.06964e-05	0.000315976	0.000292598	0.000374651	0.000378165	0.000789031	0.000184834	0.000169394
			DE: Tap water from groundwater ts				6.46685e-08	6.93308e-08	1.81916e-08	5.28835e-08	2.05822e-05	1.59825e-08	1.58805e-08	1.45135e-08	3.15813e-08	1.78164e-09	4.1643e-08	1.36507e-08	2.2782e-07	3.21198e-06	4.23949e-08	4.26036e-08	1.0622e-07	1.96858e-08	1.28773e-08
		DE: X.04 - inhouse waste water treatment [HJT] -rev5- (001) <LC>					0.00162511	0.00161177	0.000727479	0.00125124	-0.00232434	0.000604822	0.000401244	0.00130168	0.000899893	0.000368499	0.00264145	0.000608207	0.000761092	0.00126696	0.00118291	0.00119014	0.00172763	0.000944949	0.00513595
			DE: [BLOCK] X.04 - inhouse waste water treatment -rev4- (001) <LC>				7.50371e-06	7.44169e-06	3.5366e-06	5.65148e-06	-1.56385e-05	3.12131e-06	2.06705e-06	6.73631e-06	4.70761e-06	1.80198e-06	1.16787e-05	3.19331e-06	3.45782e-06	5.72227e-06	5.69573e-06	5.72989e-06	7.95432e-06	4.57425e-06	3.00087e-05
				DE: preparation of hydrogen chloride (36% in H2O) <Mfg>			1.41505e-07	1.41173e-07	5.12777e-08	1.70573e-07	2.67701e-08	2.19894e-08	4.24568e-08	2.59224e-08	2.86874e-08	8.52219e-09	1.07344e-07	3.90096e-08	7.49287e-08	1.02415e-07	1.57378e-07	1.56075e-07	1.44107e-07	5.72168e-08	3.88651e-07
					DE: Hydrochloric acid mix (100%) ts		1.15997e-07	1.15748e-07	2.27785e-08	1.47339e-07	7.27759e-09	2.4825e-09	9.45027e-10	1.49178e-09	9.46694e-09	3.68861e-09	7.60583e-08	5.46042e-09	3.54366e-08	8.38206e-08	7.34363e-08	7.2297e-08	1.18369e-07	2.96081e-08	1.11263e-07
					GLO: market for water, ultrapure ecoinvent 3.5		2.5508e-08	2.54252e-08	2.84993e-08	2.32339e-08	1.94925e-08	1.95069e-08	4.15118e-08	2.44306e-08	1.92204e-08	4.83357e-09	3.12855e-08	3.35492e-08	3.94922e-08	1.8594e-08	8.39419e-08	8.37778e-08	2.57383e-08	2.76087e-08	2.77389e-07
				DE: Electricity grid mix 1kV-60kV ts			4.29817e-06	4.26397e-06	7.96375e-07	3.2581e-06	4.85215e-07	3.12795e-08	3.46595e-08	2.88463e-08	9.35433e-08	4.06247e-07	8.30129e-06	6.28736e-08	1.85732e-06	1.7199e-06	2.20222e-06	2.22287e-06	4.63795e-06	1.08646e-06	9.95706e-07
				DE: Sludge (acid/basic) ts			9.077e-07	9.05212e-07	1.2638e-07	1.08334e-07	8.53511e-09	3.08123e-09	2.93239e-10	2.86289e-08	4.60386e-07	2.64336e-09	5.74854e-08	3.70285e-07	2.72562e-08	7.03333e-07	7.01917e-07	7.10867e-07	8.9057e-07	1.72516e-07	2.14685e-05
				DE: Sodium hydroxide mix (50%) ts			8.36688e-07	8.31954e-07	2.3244e-07	6.77323e-07	1.06636e-07	7.67153e-09	7.0045e-09	6.51871e-09	2.21931e-08	5.84987e-08	1.21862e-06	1.31242e-08	3.76918e-07	5.39304e-07	7.20912e-07	7.25171e-07	7.43989e-07	2.93622e-07	1.59292e-07
				DE: Tap water from groundwater ts			-5.48053e-08	-5.87566e-08	-1.54171e-08	-4.48178e-08	-1.7443e-05	-1.35449e-08	-1.34584e-08	-1.22999e-08	-2.67645e-08	-1.50991e-09	-3.52916e-08	-1.15687e-08	-1.93073e-07	-2.72209e-06	-3.59289e-08	-3.61058e-08	-9.00192e-08	-1.66834e-08	-1.09133e-08
				EU-28: Compressed air ts			1.5315e-07	1.52015e-07	4.39845e-08	1.61632e-07	4.02722e-08	1.31332e-09	7.99275e-10	1.28263e-09	3.30388e-09	5.75497e-08	2.19783e-07	2.49218e-09	4.90686e-08	4.29199e-08	8.63299e-08	8.70181e-08	1.07032e-07	5.98487e-08	3.19863e-08
				GLO: market for iron(III) chloride, without water, in 14% iron solution state ecoinvent 3.5			4.03103e-07	3.97632e-07	6.19425e-07	4.21481e-07	2.33501e-07	1.09384e-06	7.28236e-07	7.52667e-07	1.48024e-06	5.03767e-07	4.62119e-07	9.43089e-07	4.057e-07	8.61124e-07	6.03598e-07	6.04229e-07	7.50374e-07	5.92584e-07	2.53764e-06
				RER: market for aluminium sulfate, powder ecoinvent 3.5			4.90117e-07	4.88444e-07	1.11384e-06	6.25242e-07	4.27525e-07	1.30767e-06	7.97646e-07	5.4197e-06	1.60304e-06	6.27272e-07	4.40828e-07	1.17426e-06	3.515e-07	3.85881e-06	8.11899e-07	8.12575e-07	4.92468e-07	1.43156e-06	2.52213e-06
				RER: market for calcium chloride ecoinvent 3.5			3.28079e-07	3.20044e-07	5.6829e-07	2.73619e-07	4.76067e-07	6.68016e-07	4.69409e-07	4.85043e-07	1.04298e-06	1.38989e-07	9.06514e-07	5.99748e-07	5.08209e-07	6.1655e-07	4.47411e-07	4.47192e-07	2.77848e-07	8.97124e-07	1.91566e-06
			DE: preparation of hydrogen chloride (36% in H2O) <Mfg>				2.71776e-05	2.71138e-05	9.84846e-06	3.27604e-05	5.14149e-06	4.22332e-06	8.1543e-06	4.97868e-06	5.50972e-06	1.63678e-06	2.06166e-05	7.49223e-06	1.43909e-05	1.96699e-05	3.02262e-05	2.99759e-05	2.76774e-05	1.09891e-05	7.46448e-05
				DE: Hydrochloric acid mix (100%) ts			2.22785e-05	2.22307e-05	4.37485e-06	2.82981e-05	1.39774e-06	4.76791e-07	1.81503e-07	2.86514e-07	1.81823e-06	7.08439e-07	1.46078e-05	1.04873e-06	6.80598e-06	1.60987e-05	1.41042e-05	1.38854e-05	2.27341e-05	5.68656e-06	2.13693e-05
				GLO: market for water, ultrapure ecoinvent 3.5			4.8991e-06	4.88318e-06	5.4736e-06	4.46233e-06	3.74374e-06	3.74652e-06	7.9728e-06	4.69216e-06	3.69149e-06	9.28341e-07	6.00872e-06	6.4435e-06	7.58491e-06	3.57119e-06	1.6122e-05	1.60905e-05	4.94333e-06	5.30255e-06	5.32755e-05
			DE: X.07 - acidic exhaust air washer -rev5- (001) <Mfg>				7.72085e-13	7.66923e-13	1.56785e-13	5.92553e-13	2.75859e-12	9.84136e-15	8.70473e-15	1.0233e-14	2.25406e-14	6.94217e-14	1.41657e-12	1.49492e-14	3.62125e-13	7.59905e-13	4.42891e-13	4.46599e-13	8.47957e-13	2.08993e-13	1.80098e-13
				DE: X.03 - ultrapure water system -rev4- (001) <Mfg>			1.1062e-13	1.1042e-13	2.21022e-14	8.43995e-14	2.68201e-12	4.77975e-15	3.33047e-15	5.65224e-15	7.5208e-15	1.01261e-14	2.01281e-13	5.13464e-15	7.38868e-14	4.63192e-13	5.8213e-14	5.87057e-14	1.5908e-13	2.89288e-14	3.22728e-14
					CH: ion-exchanger production for water treatment ecoinvent 3.5		1.0964e-15	1.09682e-15	1.00362e-15	8.76893e-16	3.08217e-16	1.97022e-15	4.54629e-16	3.09055e-15	1.22249e-15	3.35709e-16	5.55312e-16	1.88425e-15	6.28687e-16	6.00843e-15	8.9593e-16	8.75567e-16	3.61717e-14	8.10777e-16	7.17385e-15
					DE: Electricity grid mix 1kV-60kV ts		1.01132e-13	1.00327e-13	1.87379e-14	7.66597e-14	1.14166e-14	7.35974e-16	8.15501e-16	6.78723e-16	2.20098e-15	9.55857e-15	1.95321e-13	1.47935e-15	4.37007e-14	4.04676e-14	5.18158e-14	5.23018e-14	1.09126e-13	2.55633e-14	2.34279e-14
					DE: Tap water from groundwater ts		8.38995e-15	8.99483e-15	2.36014e-15	6.86099e-15	2.67028e-12	2.07354e-15	2.0603e-15	1.88295e-15	4.09729e-15	2.31146e-16	5.40267e-15	1.77101e-15	2.95568e-14	4.16715e-13	5.50022e-15	5.5273e-15	1.37807e-14	2.554e-15	1.67067e-15
					DE: X.03 - ultra pure water system -rev4- (001) ecoinvent 3.5 <u-so>		4.32858e-23	4.31807e-23	0	0	-7.75216e-24	0	3.03246e-20	0	0	0	0	0	3.13952e-20	0	0	0	0	0	0
					EU-28: Compressed air ts		1.87449e-18	1.8606e-18	5.38351e-19	1.9783e-18	4.92914e-19	1.60744e-20	9.78278e-21	1.56988e-20	4.0438e-20	7.04384e-19	2.69005e-18	3.05031e-20	6.00578e-19	5.25321e-19	1.05664e-18	1.06506e-18	1.31003e-18	7.32522e-19	3.91498e-19
				DE: Electricity grid mix 1kV-60kV ts			5.30421e-13	5.262e-13	9.82774e-14	4.02069e-13	5.98785e-14	3.86008e-15	4.27719e-15	3.55981e-15	1.15438e-14	5.01334e-14	1.02443e-12	7.75898e-15	2.29204e-13	2.12247e-13	2.71767e-13	2.74316e-13	5.72351e-13	1.34076e-13	1.22876e-13
				DE: Sodium hydroxide mix (50%) ts			1.31044e-13	1.30303e-13	3.64053e-14	1.06084e-13	1.67017e-14	1.20154e-15	1.09706e-15	1.02098e-15	3.47595e-15	9.16223e-15	1.90863e-13	2.05556e-15	5.90339e-14	8.44673e-14	1.12911e-13	1.13578e-13	1.16525e-13	4.59878e-14	2.49488e-14
			DE: X.08 - caustic exhaust air washer -rev4- (001) <Mfg>				3.84035e-05	3.81374e-05	1.69923e-05	3.47403e-05	9.69385e-05	6.10473e-07	3.88263e-07	4.71592e-07	1.61392e-06	3.40987e-06	6.94447e-05	1.0172e-06	1.68467e-05	2.91663e-05	1.97924e-05	1.99196e-05	4.11197e-05	2.41967e-05	9.54935e-06
				DE: X.03 - ultrapure water system -rev4- (001) <Mfg>			3.8411e-06	3.83417e-06	7.67463e-07	2.93064e-06	9.31286e-05	1.65969e-07	1.15645e-07	1.96265e-07	2.61148e-07	3.51614e-07	6.98918e-06	1.78293e-07	2.56561e-06	1.60836e-05	2.02136e-06	2.03847e-06	5.5238e-06	1.00451e-06	1.12062e-06
					CH: ion-exchanger production for water treatment ecoinvent 3.5		3.80708e-08	3.80855e-08	3.48492e-08	3.04488e-08	1.07024e-08	6.84129e-08	1.57863e-08	1.07315e-07	4.24492e-08	1.1657e-08	1.92823e-08	6.54277e-08	2.18302e-08	2.08633e-07	3.11098e-08	3.04027e-08	1.25601e-06	2.8153e-08	2.49101e-07
					DE: Electricity grid mix 1kV-60kV ts		3.51164e-06	3.48369e-06	6.50643e-07	2.66189e-06	3.96424e-07	2.55555e-08	2.8317e-08	2.35676e-08	7.64255e-08	3.31907e-07	6.7822e-06	5.13681e-08	1.51744e-06	1.40517e-06	1.79922e-06	1.8161e-06	3.78924e-06	8.87647e-07	8.13498e-07
					DE: Tap water from groundwater ts		2.91328e-07	3.12332e-07	8.19523e-08	2.38237e-07	9.27215e-05	7.20003e-08	7.15408e-08	6.53824e-08	1.42272e-07	8.02619e-09	1.87599e-07	6.14957e-08	1.02631e-06	1.44698e-05	1.90987e-07	1.91927e-07	4.78514e-07	8.86837e-08	5.80116e-08
					DE: X.03 - ultra pure water system -rev4- (001) ecoinvent 3.5 <u-so>		1.50303e-15	1.49938e-15	0	0	-2.69182e-16	0	1.05298e-12	0	0	0	0	0	1.09015e-12	0	0	0	0	0	0
					EU-28: Compressed air ts		6.50887e-11	6.46064e-11	1.86934e-11	6.86935e-11	1.71157e-11	5.5816e-13	3.39692e-13	5.45117e-13	1.40415e-12	2.44586e-11	9.34078e-11	1.05917e-12	2.08541e-11	1.8241e-11	3.66902e-11	3.69827e-11	4.54888e-11	2.54357e-11	1.35942e-11
				DE: Electricity grid mix 1kV-60kV ts			3.1456e-05	3.12057e-05	5.82823e-06	2.38443e-05	3.55102e-06	2.28918e-07	2.53654e-07	2.1111e-07	6.84592e-07	2.9731e-06	6.07526e-05	4.60137e-07	1.35927e-05	1.2587e-05	1.61168e-05	1.6268e-05	3.39427e-05	7.95123e-06	7.28703e-06
				DE: Sulphuric acid (96%) ts			3.10642e-06	3.09759e-06	1.03966e-05	7.96542e-06	2.58816e-07	2.15586e-07	1.89641e-08	6.42163e-08	6.68178e-07	8.51586e-08	1.70289e-06	3.78773e-07	6.88412e-07	4.95695e-07	1.65426e-06	1.61313e-06	1.6532e-06	1.5241e-05	1.14169e-06
			DE: X.09.oe3 - Process exhaust ventilators -rev4- (001) <LC>				5.4556e-06	5.41218e-06	1.01082e-06	4.13545e-06	6.15875e-07	3.97025e-08	4.39927e-08	3.66141e-08	1.18733e-07	5.15642e-07	1.05367e-05	7.98043e-08	2.35746e-06	2.18304e-06	2.79523e-06	2.82145e-06	5.88687e-06	1.37903e-06	1.26383e-06
				DE: Electricity grid mix 1kV-60kV ts			5.4556e-06	5.41218e-06	1.01082e-06	4.13545e-06	6.15875e-07	3.97025e-08	4.39927e-08	3.66141e-08	1.18733e-07	5.15642e-07	1.05367e-05	7.98043e-08	2.35746e-06	2.18304e-06	2.79523e-06	2.82145e-06	5.88687e-06	1.37903e-06	1.26383e-06
			DE: X.09.oe4 - Process exhaust ventilators -rev4- (001) <LC>				3.27336e-06	3.24731e-06	6.06495e-07	2.48127e-06	3.69525e-07	2.38215e-08	2.63956e-08	2.19685e-08	7.12397e-08	3.09385e-07	6.32201e-06	4.78826e-08	1.41448e-06	1.30983e-06	1.67714e-06	1.69287e-06	3.53212e-06	8.27417e-07	7.58299e-07
				DE: Electricity grid mix 1kV-60kV ts			3.27336e-06	3.24731e-06	6.06495e-07	2.48127e-06	3.69525e-07	2.38215e-08	2.63956e-08	2.19685e-08	7.12397e-08	3.09385e-07	6.32201e-06	4.78826e-08	1.41448e-06	1.30983e-06	1.67714e-06	1.69287e-06	3.53212e-06	8.27417e-07	7.58299e-07
			DE: Electricity grid mix 1kV-60kV ts				0.000977404	0.000969627	0.000181095	0.000740891	0.000110338	7.11295e-06	7.88156e-06	6.55964e-06	2.12717e-05	9.23805e-05	0.00188771	1.42974e-05	0.000422353	0.000391106	0.000500783	0.00050548	0.00105467	0.000247061	0.000226423
			DE: Sludge (acid/basic) ts				0.000144488	0.000144092	2.01171e-05	1.72445e-05	1.35862e-06	4.9047e-07	4.66777e-08	4.55714e-06	7.32842e-05	4.2077e-07	9.15053e-06	5.8942e-05	4.33864e-06	0.000111957	0.000111731	0.000113156	0.000141761	2.74611e-05	0.00341736
			DE: Sodium hydroxide mix (50%) ts				0.000160707	0.000159798	4.4646e-05	0.000130097	2.04822e-05	1.47351e-06	1.34539e-06	1.25209e-06	4.26276e-06	1.12362e-05	0.000234067	2.52085e-06	7.23967e-05	0.000103587	0.00013847	0.000139288	0.000142902	5.63976e-05	3.05962e-05
			DE: Tap water from groundwater ts				-8.70799e-06	-9.3358e-06	-2.44961e-06	-7.12107e-06	-0.00277151	-2.15214e-06	-2.1384e-06	-1.95432e-06	-4.2526e-06	-2.39908e-07	-5.60747e-06	-1.83815e-06	-3.06772e-05	-0.000432511	-5.70872e-06	-5.73683e-06	-1.43031e-05	-2.65081e-06	-1.734e-06
			EU-28: Compressed air ts				3.48262e-05	3.45682e-05	1.00021e-05	3.6755e-05	9.15788e-06	2.98648e-07	1.81755e-07	2.9167e-07	7.51301e-07	1.30868e-05	4.99786e-05	5.6672e-07	1.11582e-05	9.75999e-06	1.96314e-05	1.97879e-05	2.43391e-05	1.36096e-05	7.27368e-06
			GLO: market for iron(III) chloride, without water, in 14% iron solution state ecoinvent 3.5				7.74262e-05	7.63754e-05	0.000118976	8.09562e-05	4.48498e-05	0.0002101	0.000139876	0.000144569	0.000284318	9.67613e-05	8.87619e-05	0.000181144	7.79251e-05	0.000165401	0.000115936	0.000116058	0.000144129	0.000113821	0.00048742
			RER: market for aluminium sulfate, powder ecoinvent 3.5				9.41395e-05	9.38182e-05	0.000213942	0.000120094	8.21171e-05	0.000251171	0.000153208	0.00104099	0.000307906	0.000120484	8.46723e-05	0.000225546	6.75147e-05	0.000741183	0.000155946	0.000156076	9.45912e-05	0.000274967	0.000484439
			RER: market for calcium chloride ecoinvent 3.5				6.30161e-05	6.14727e-05	0.000109155	5.25556e-05	9.14408e-05	0.00012831	9.01621e-05	9.3165e-05	0.000200331	2.66964e-05	0.000174119	0.000115197	9.76146e-05	0.000118424	8.59367e-05	8.58948e-05	5.33678e-05	0.000172316	0.000367951
		DE: X.07 - acidic exhaust air washer -rev5- (001) <Mfg>					8.11278e-12	8.05854e-12	1.64744e-12	6.22632e-12	2.89862e-11	1.03409e-13	9.1466e-14	1.07525e-13	2.36848e-13	7.29457e-13	1.48848e-11	1.5708e-13	3.80507e-12	7.9848e-12	4.65373e-12	4.6927e-12	8.91001e-12	2.19602e-12	1.8924e-12
			DE: X.03 - ultrapure water system -rev4- (001) <Mfg>				1.16235e-12	1.16026e-12	2.32241e-13	8.86839e-13	2.81816e-11	5.02238e-14	3.49954e-14	5.93916e-14	7.90257e-14	1.06402e-13	2.11499e-12	5.39529e-14	7.76375e-13	4.86704e-12	6.11681e-13	6.16858e-13	1.67155e-12	3.03973e-13	3.39111e-13
				CH: ion-exchanger production for water treatment ecoinvent 3.5			1.15205e-14	1.1525e-14	1.05457e-14	9.21406e-15	3.23863e-15	2.07024e-14	4.77707e-15	3.24744e-14	1.28455e-14	3.5275e-15	5.83501e-15	1.9799e-14	6.60601e-15	6.31343e-14	9.4141e-15	9.20013e-15	3.80079e-13	8.51934e-15	7.53801e-14
				DE: Electricity grid mix 1kV-60kV ts			1.06265e-12	1.0542e-12	1.9689e-13	8.05511e-13	1.19961e-13	7.73333e-15	8.56898e-15	7.13177e-15	2.3127e-14	1.00438e-13	2.05236e-12	1.55444e-14	4.59191e-13	4.25218e-13	5.44461e-13	5.49568e-13	1.14666e-12	2.6861e-13	2.46172e-13
				DE: Tap water from groundwater ts			8.81585e-14	9.45143e-14	2.47995e-14	7.20927e-14	2.80584e-11	2.17879e-14	2.16489e-14	1.97853e-14	4.30528e-14	2.4288e-15	5.67692e-14	1.86091e-14	3.10572e-13	4.37869e-12	5.77943e-14	5.80788e-14	1.44803e-13	2.68365e-14	1.75548e-14
				DE: X.03 - ultra pure water system -rev4- (001) ecoinvent 3.5 <u-so>			4.54831e-22	4.53727e-22	0	0	-8.14568e-23	0	3.1864e-19	0	0	0	0	0	3.29889e-19	0	0	0	0	0	0
				EU-28: Compressed air ts			1.96964e-17	1.95505e-17	5.65679e-18	2.07873e-17	5.17935e-18	1.68904e-19	1.02794e-19	1.64957e-19	4.24908e-19	7.4014e-18	2.8266e-17	3.20516e-19	6.31065e-18	5.51988e-18	1.11028e-17	1.11913e-17	1.37653e-17	7.69707e-18	4.11372e-18
			DE: Electricity grid mix 1kV-60kV ts				5.57346e-12	5.52911e-12	1.03266e-12	4.22479e-12	6.29181e-13	4.05602e-14	4.49431e-14	3.74051e-14	1.21298e-13	5.26783e-13	1.07643e-11	8.15284e-14	2.40839e-12	2.23021e-12	2.85562e-12	2.8824e-12	6.01405e-12	1.40882e-12	1.29114e-12
			DE: Sodium hydroxide mix (50%) ts				1.37697e-12	1.36917e-12	3.82534e-13	1.11469e-12	1.75495e-13	1.26253e-14	1.15275e-14	1.07281e-14	3.6524e-14	9.62733e-14	2.00552e-12	2.1599e-14	6.20306e-13	8.8755e-13	1.18643e-12	1.19344e-12	1.22441e-12	4.83223e-13	2.62153e-13
		DE: X.08 - caustic exhaust air washer -rev4- (001) <Mfg>					0.000631034	0.000626662	0.000279211	0.000570842	0.00159286	1.00311e-05	6.37982e-06	7.74905e-06	2.65194e-05	5.603e-05	0.00114109	1.67144e-05	0.00027682	0.000479252	0.000325223	0.000327312	0.000675665	0.000397593	0.000156912
			DE: X.03 - ultrapure water system -rev4- (001) <Mfg>				6.31157e-05	6.30019e-05	1.26107e-05	4.81554e-05	0.00153026	2.72715e-06	1.90025e-06	3.22497e-06	4.2911e-06	5.77761e-06	0.000114844	2.92965e-06	4.21572e-05	0.000264281	3.32143e-05	3.34954e-05	9.07653e-05	1.65058e-05	1.84137e-05
				CH: ion-exchanger production for water treatment ecoinvent 3.5			6.25566e-07	6.25809e-07	5.72632e-07	5.00324e-07	1.75858e-07	1.12414e-06	2.59395e-07	1.76336e-06	6.97512e-07	1.91544e-07	3.16841e-07	1.07509e-06	3.58707e-07	3.4282e-06	5.11186e-07	4.99567e-07	2.06383e-05	4.62601e-07	4.09315e-06
				DE: Electricity grid mix 1kV-60kV ts			5.77021e-05	5.72429e-05	1.06912e-05	4.37393e-05	6.51391e-06	4.1992e-07	4.65296e-07	3.87255e-07	1.2558e-06	5.45378e-06	0.000111443	8.44064e-07	2.49341e-05	2.30894e-05	2.95643e-05	2.98416e-05	6.22635e-05	1.45855e-05	1.33671e-05
				DE: Tap water from groundwater ts			4.78701e-06	5.13213e-06	1.34661e-06	3.91464e-06	0.00152357	1.18309e-06	1.17554e-06	1.07434e-06	2.33777e-06	1.31884e-07	3.08257e-06	1.01048e-06	1.68641e-05	0.000237763	3.13823e-06	3.15368e-06	7.86278e-06	1.45722e-06	9.53228e-07
				DE: X.03 - ultra pure water system -rev4- (001) ecoinvent 3.5 <u-so>			2.46973e-14	2.46374e-14	0	0	-4.42311e-15	0	1.73022e-11	0	0	0	0	0	1.7913e-11	0	0	0	0	0	0
				EU-28: Compressed air ts			1.06952e-09	1.06159e-09	3.07164e-10	1.12875e-09	2.81239e-10	9.1715e-12	5.58171e-12	8.95719e-12	2.30725e-11	4.01896e-10	1.53485e-09	1.7404e-11	3.42668e-10	2.9973e-10	6.02882e-10	6.07687e-10	7.47457e-10	4.17951e-10	2.23375e-10
			DE: Electricity grid mix 1kV-60kV ts				0.000516875	0.000512762	9.57676e-05	0.000391801	5.83493e-05	3.7615e-06	4.16796e-06	3.4689e-06	1.1249e-05	4.88531e-05	0.000998267	7.56083e-06	0.000223351	0.000206826	0.000264826	0.00026731	0.000557735	0.000130652	0.000119738
			DE: Sulphuric acid (96%) ts				5.10437e-05	5.08986e-05	0.000170833	0.000130885	4.25278e-06	3.54244e-06	3.11612e-07	1.05518e-06	1.09793e-05	1.3993e-06	2.79813e-05	6.22388e-06	1.13118e-05	8.1451e-06	2.71823e-05	2.65065e-05	2.71648e-05	0.000250435	1.876e-05
		DE: X.09.oe1 - Process exhaust ventilators -rev4- (001) <LC>					8.11953e-05	8.05492e-05	1.5044e-05	6.15476e-05	9.16603e-06	5.9089e-07	6.5474e-07	5.44926e-07	1.76709e-06	7.67428e-06	0.000156817	1.18772e-06	3.50859e-05	3.24901e-05	4.16013e-05	4.19915e-05	8.7614e-05	2.0524e-05	1.88095e-05
			DE: Electricity grid mix 1kV-60kV ts				8.11953e-05	8.05492e-05	1.5044e-05	6.15476e-05	9.16603e-06	5.9089e-07	6.5474e-07	5.44926e-07	1.76709e-06	7.67428e-06	0.000156817	1.18772e-06	3.50859e-05	3.24901e-05	4.16013e-05	4.19915e-05	8.7614e-05	2.0524e-05	1.88095e-05
		DE: X.09.oe3 - Process exhaust ventilators -rev4- (001) <LC>					5.73254e-05	5.68692e-05	1.06214e-05	4.34537e-05	6.47138e-06	4.17179e-07	4.62259e-07	3.84727e-07	1.2476e-06	5.41818e-06	0.000110715	8.38554e-07	2.47713e-05	2.29386e-05	2.93713e-05	2.96467e-05	6.18571e-05	1.44903e-05	1.32799e-05
			DE: Electricity grid mix 1kV-60kV ts				5.73254e-05	5.68692e-05	1.06214e-05	4.34537e-05	6.47138e-06	4.17179e-07	4.62259e-07	3.84727e-07	1.2476e-06	5.41818e-06	0.000110715	8.38554e-07	2.47713e-05	2.29386e-05	2.93713e-05	2.96467e-05	6.18571e-05	1.44903e-05	1.32799e-05
		DE: X.09.oe4 - Process exhaust ventilators -rev4- (001) <LC>					5.37868e-05	5.33588e-05	9.96573e-06	4.07714e-05	6.07192e-06	3.91427e-07	4.33724e-07	3.60979e-07	1.17059e-06	5.08372e-06	0.000103881	7.86791e-07	2.32422e-05	2.15227e-05	2.75582e-05	2.78167e-05	5.80387e-05	1.35958e-05	1.24601e-05
			DE: Electricity grid mix 1kV-60kV ts				5.37868e-05	5.33588e-05	9.96573e-06	4.07714e-05	6.07192e-06	3.91427e-07	4.33724e-07	3.60979e-07	1.17059e-06	5.08372e-06	0.000103881	7.86791e-07	2.32422e-05	2.15227e-05	2.75582e-05	2.78167e-05	5.80387e-05	1.35958e-05	1.24601e-05
		DE: X.09.oe5 - Process exhaust ventilators -rev4- (001) <LC>					3.5386e-05	3.51045e-05	6.5564e-06	2.68233e-05	3.99468e-06	2.57518e-07	2.85345e-07	2.37486e-07	7.70124e-07	3.34455e-06	6.83429e-05	5.17626e-07	1.52909e-05	1.41596e-05	1.81304e-05	1.83005e-05	3.81834e-05	8.94464e-06	8.19745e-06
			DE: Electricity grid mix 1kV-60kV ts				3.5386e-05	3.51045e-05	6.5564e-06	2.68233e-05	3.99468e-06	2.57518e-07	2.85345e-07	2.37486e-07	7.70124e-07	3.34455e-06	6.83429e-05	5.17626e-07	1.52909e-05	1.41596e-05	1.81304e-05	1.83005e-05	3.81834e-05	8.94464e-06	8.19745e-06
		DE: X.09.oe6 - Process exhaust ventilators -rev4- (001) <LC>					2.76011e-05	2.73815e-05	5.11399e-06	2.09222e-05	3.11585e-06	2.00864e-07	2.22569e-07	1.85239e-07	6.00696e-07	2.60875e-06	5.33075e-05	4.03748e-07	1.19269e-05	1.10445e-05	1.41417e-05	1.42744e-05	2.9783e-05	6.97682e-06	6.39401e-06
			DE: Electricity grid mix 1kV-60kV ts				2.76011e-05	2.73815e-05	5.11399e-06	2.09222e-05	3.11585e-06	2.00864e-07	2.22569e-07	1.85239e-07	6.00696e-07	2.60875e-06	5.33075e-05	4.03748e-07	1.19269e-05	1.10445e-05	1.41417e-05	1.42744e-05	2.9783e-05	6.97682e-06	6.39401e-06
		DE: X.09.oe7 - Process exhaust ventilators -rev4- (001) <LC>					1.2739e-07	1.26376e-07	2.3603e-08	9.65639e-08	1.43809e-08	9.27065e-10	1.02724e-09	8.5495e-10	2.77245e-09	1.20404e-08	2.46034e-07	1.86345e-09	5.50473e-08	5.09747e-08	6.52695e-08	6.58816e-08	1.3746e-07	3.22007e-08	2.95108e-08
			DE: Electricity grid mix 1kV-60kV ts				1.2739e-07	1.26376e-07	2.3603e-08	9.65639e-08	1.43809e-08	9.27065e-10	1.02724e-09	8.5495e-10	2.77245e-09	1.20404e-08	2.46034e-07	1.86345e-09	5.50473e-08	5.09747e-08	6.52695e-08	6.58816e-08	1.3746e-07	3.22007e-08	2.95108e-08
		DE: X.10 - general exhausts to air filter <LC>					8.33688e-07	8.28152e-07	1.77098e-06	7.70592e-07	2.20282e-07	1.98533e-06	1.04743e-06	3.32884e-06	2.65384e-06	3.51861e-07	5.10613e-07	2.06751e-06	8.36944e-07	5.67948e-06	1.14323e-06	1.11723e-06	6.63425e-07	3.21333e-06	8.23446e-06
			GLO: market for air filter, central unit, 600 m3/h ecoinvent 3.5				8.21627e-07	8.1612e-07	1.76772e-06	7.6937e-07	2.20129e-07	1.94767e-06	1.04691e-06	3.32626e-06	2.63751e-06	3.51485e-07	5.08367e-07	2.03478e-06	4.57296e-07	5.67874e-06	1.12857e-06	1.10356e-06	6.51745e-07	3.21024e-06	8.176e-06
			RoW: treatment of used air filter, central unit, 600 m3/h ecoinvent 3.5				1.20607e-08	1.20316e-08	3.25448e-09	1.22215e-09	1.53818e-10	3.76659e-08	5.19186e-10	2.58021e-09	1.63304e-08	3.76055e-10	2.24587e-09	3.27389e-08	3.79648e-07	7.38014e-10	1.46513e-08	1.36736e-08	1.16803e-08	3.08634e-09	5.84666e-08
		DE: Hazardous waste (statistical average) (no C, worst case scenario incl. landfill) ts					-5.06923e-07	-5.03485e-07	-3.00743e-07	-3.22567e-07	-3.93852e-08	-1.0585e-08	-1.82196e-09	-7.34951e-08	-1.17658e-06	-1.75953e-08	-4.14628e-07	-9.43686e-07	-1.21955e-07	-3.97449e-06	-1.31534e-06	-1.33076e-06	-1.12086e-06	-4.02982e-07	-5.44444e-05
		DE: Municipal waste water treatment (mix) ts					0.00107446	0.00164121	0.000232771	0.000384756	-0.0431866	0.00176912	0.00179818	0.00163096	0.00342179	3.60555e-05	0.000805803	0.00144633	0.0251193	-0.000976818	0.000648773	0.000655363	0.00937384	0.000308555	0.000243961
		DE: Municipal waste water treatment (mix) ts					0.000221079	0.000337694	4.78948e-05	7.9167e-05	-0.00888604	0.000364014	0.000369991	0.000335584	0.000704065	7.41875e-06	0.000165801	0.000297596	0.00516852	-0.000200989	0.000133491	0.000134847	0.00192875	6.3488e-05	5.01972e-05
		DE: treatment of waste, from silicon wafer production, underground deposit ecoinvent 3.5					-1.66679e-06	-1.27628e-06	-2.13617e-06	-1.33665e-06	-3.2583e-07	-1.44367e-06	-1.52869e-06	-5.39556e-06	-1.11403e-06	-1.92199e-07	-8.05925e-06	-1.29323e-06	-7.49802e-07	-1.54485e-05	-2.3515e-06	-2.22753e-06	-8.82432e-07	-1.56296e-06	-2.89276e-06
		DE: X.12 - exhaust (VOC) to air -rev4- (001) <u-so>					0	0	0	0	0	1.84948e-07	0	0	0	0	0	1.45343e-08	0	0	0	0	0	0	5.15431e-06
	DE: C - module production (007) <Mfg>						0.229286	0.222216	0.161776	0.183478	0.0442405	0.0426523	0.0252325	0.0297106	0.051524	0.0326358	0.424044	0.0495176	0.0880271	0.383086	0.243579	0.244702	0.154578	0.203992	0.32548
		DE: C.01 - module assembly (007) <Mfg>					0.225517	0.224451	0.157994	0.179689	0.0432853	0.036839	0.0218846	0.0261867	0.047254	0.030618	0.287076	0.0443362	0.0744337	0.380842	0.237059	0.238313	0.146185	0.20045	0.312929
			DE: cell fixation tape (generic tape) <Mfg>				0.000270258	0.000242513	9.32096e-05	0.000296151	0.00107151	2.54428e-05	6.6394e-05	3.57622e-06	-2.18988e-05	1.57524e-05	0.00492438	2.48653e-05	0.00225134	0.000212126	0.000293885	0.000291438	0.00124026	0.000125392	9.50755e-05
				DE: Elastomer joint tape, polyurethane (EN15804 A1-A3) ts			0.000110337	0.000109884	3.38009e-05	0.000137186	2.107e-05	2.97464e-06	1.61469e-06	1.765e-06	1.15458e-05	5.36557e-06	0.000120213	4.60935e-06	6.10052e-05	7.38473e-05	9.23184e-05	9.04441e-05	0.000178593	4.42206e-05	2.41735e-05
				DE: Joint sealing tape fabric tape (EN15804 A1-A3) ts			0.000159921	0.000132629	5.94087e-05	0.000158965	0.00105044	2.24682e-05	6.47793e-05	1.81122e-06	-3.34447e-05	1.03869e-05	0.00480417	2.0256e-05	0.00219034	0.000138279	0.000201566	0.000200993	0.00106167	8.11711e-05	7.0902e-05
			DE: copper smartwires (SWCT wires) <Mfg>				0.00172861	0.00171845	0.00167522	0.00123207	0.000708747	0.000615493	7.87186e-06	3.86759e-05	0.00198673	5.41051e-05	0.0596239	0.00480845	0.000466794	0.144619	0.00174009	0.00175625	0.00329475	0.00222692	0.0984055
				DE: Copper mix (99,999% from electrolysis) ts			0.00142561	0.00141789	0.00161912	0.00100249	0.000674604	0.000613292	5.43289e-06	3.66474e-05	0.00198014	2.55927e-05	0.0590392	0.00480402	0.000336078	0.144498	0.00158485	0.00159956	0.0029683	0.00215038	0.0983353
				DE: District heating mix (EN15804 B6) ts			1.35643e-06	1.31985e-06	2.1183e-07	9.21368e-07	9.11373e-08	5.88227e-09	6.57023e-09	4.1064e-09	2.70394e-08	2.03862e-09	2.11007e-06	1.51458e-08	3.70227e-07	3.53858e-07	6.83169e-07	6.88641e-07	9.58938e-07	2.87777e-07	2.44311e-07
				DE: Electricity grid mix 1kV-60kV ts			0.000301645	0.000299245	5.58895e-05	0.000228653	3.40523e-05	2.19519e-06	2.4324e-06	2.02443e-06	6.56485e-06	2.85104e-05	0.000582583	4.41246e-06	0.000130346	0.000120703	0.000154551	0.000156001	0.000325491	7.62478e-05	6.98785e-05
			DE: interconnection ribbon (copper wires) <Mfg>				0.000786166	0.000781726	0.000827653	0.00055657	0.000347279	0.000309186	3.28683e-06	1.8905e-05	0.000998152	1.93381e-05	0.0298485	0.002419	0.000198758	0.0727574	0.000832855	0.000840586	0.00156795	0.00109968	0.0495109
				DE: Copper mix (99,999% from electrolysis) ts			0.000717551	0.000713663	0.000814949	0.000504583	0.000339548	0.000308688	2.73453e-06	1.84457e-05	0.00099666	1.28815e-05	0.0297161	0.002418	0.000169158	0.07273	0.000797702	0.000805104	0.00149403	0.00108235	0.049495
				DE: District heating mix (EN15804 B6) ts			3.07161e-07	2.98878e-07	4.79684e-08	2.08642e-07	2.06378e-08	1.33203e-09	1.48781e-09	9.29886e-10	6.12301e-09	4.61641e-10	4.77821e-07	3.42973e-09	8.38371e-08	8.01302e-08	1.54702e-07	1.55941e-07	2.17149e-07	6.51665e-08	5.53237e-08
				DE: Electricity grid mix 1kV-60kV ts			6.83074e-05	6.77638e-05	1.26561e-05	5.17783e-05	7.71113e-06	4.971e-07	5.50815e-07	4.58431e-07	1.48661e-06	6.45616e-06	0.000131926	9.99199e-07	2.95168e-05	2.7333e-05	3.4998e-05	3.53263e-05	7.37072e-05	1.72663e-05	1.58239e-05
			DE: j-box set (3 junction boxes) <Mfg>				0.00498027	0.00489861	0.00408954	0.00758887	0.00174467	0.00462177	0.00332022	0.0038953	0.00397328	0.00332014	0.00360305	0.00396367	0.00189235	0.00202713	0.00513523	0.00495062	0.00272354	0.00446068	0.0078373
				GLO: market for polyethylene terephthalate, granulate, amorphous ecoinvent 3.5			0.00290157	0.00289185	0.00252152	0.00417846	0.000961327	0.00256337	0.00153456	0.00229634	0.00266427	0.000760937	0.00111384	0.00230464	0.000811483	0.00129799	0.00311097	0.00301384	0.00131482	0.00247289	0.00649422
				GLO: market for polyethylene, high density, granulate ecoinvent 3.5			0.000299557	0.000300513	0.000164409	0.000618694	5.14198e-05	9.46443e-05	1.03434e-05	0.000138116	2.69111e-05	2.01467e-06	1.40569e-05	8.45274e-05	1.0076e-05	7.24938e-06	0.000341741	0.00031296	1.24764e-05	0.000212316	0.000144996
				GLO: market for polypropylene, granulate ecoinvent 3.5			0.00049458	0.000495229	0.000255533	0.000985329	0.000105147	0.000133548	3.33433e-05	0.000189774	3.98613e-05	3.03189e-06	2.25848e-05	0.000121116	4.14362e-05	1.19827e-05	0.00054223	0.000503741	1.96277e-05	0.000330377	0.000235991
				RER: injection moulding ecoinvent 3.5			0.00128455	0.00121101	0.00114807	0.00180639	0.000626772	0.00183021	0.00174197	0.00127107	0.00124223	0.00255415	0.00245257	0.00145339	0.00102936	0.000709906	0.00114029	0.00112008	0.00137662	0.0014451	0.000962092
			DE: Aluminium frame profile, powder coated (EN15804 A1-A3) ts				0.098303	0.0981702	0.047203	0.0808776	0.021459	0.00200002	0.000688962	0.00162367	0.00396243	0.0142036	0.0482477	0.00308484	0.0270299	0.106924	0.0720556	0.0725888	0.0461892	0.0627906	0.0173421
			DE: Electricity grid mix 1kV-60kV ts				0.0573354	0.0568792	0.0106232	0.0434614	0.00647252	0.000417252	0.00046234	0.000384795	0.00124782	0.00541913	0.110735	0.000838701	0.0247756	0.0229426	0.0293764	0.0296519	0.0618679	0.0144928	0.0132822
			DE: Hazardous waste (statistical average) (no C, worst case scenario incl. landfill) ts				-1.3811e-07	-1.37173e-07	-8.19367e-08	-8.78827e-08	-1.07304e-08	-2.88386e-09	-4.96389e-10	-2.00236e-08	-3.20556e-07	-4.7938e-09	-1.12964e-07	-2.57105e-07	-3.32264e-08	-1.08284e-06	-3.58361e-07	-3.62562e-07	-3.05376e-07	-1.09792e-07	-1.48332e-05
			DE: Municipal waste water treatment (mix) ts				8.0497e-06	1.22957e-05	1.74389e-06	2.88254e-06	-0.000323549	1.32541e-05	1.34717e-05	1.22189e-05	2.56356e-05	2.70124e-07	6.03698e-06	1.08357e-05	0.000188191	-7.3182e-06	4.86053e-06	4.9099e-06	7.02277e-05	2.31166e-06	1.82773e-06
			DE: Sealants based on silicone - Deutsche Bauchemie e.V. (DBC) (A5) ts-EPD <p-agg>				9.11197e-07	1.11636e-06	1.12208e-08	1.06809e-08	7.369e-08	5.84892e-11	2.11129e-11	4.54918e-11	2.99276e-10	8.46129e-10	1.96525e-09	3.30255e-10	3.19115e-09	1.28465e-08	1.26673e-05	7.99174e-06	1.0602e-08	2.20299e-08	2.30449e-09
			DE: Tap water from groundwater ts				4.08796e-06	4.38269e-06	1.14997e-06	3.34298e-06	0.00130108	1.01032e-06	1.00387e-06	9.17457e-07	1.99638e-06	1.12625e-07	2.63242e-06	8.62918e-07	1.44014e-05	0.000203042	2.67996e-06	2.69315e-06	6.71458e-06	1.24442e-06	8.14028e-07
			DE: Tap water from groundwater ts				-3.06597e-06	-3.28702e-06	-8.62476e-07	-2.50724e-06	-0.000975813	-7.5774e-07	-7.52904e-07	-6.88093e-07	-1.49729e-06	-8.44686e-08	-1.97432e-06	-6.47188e-07	-1.08011e-05	-0.000152282	-2.00997e-06	-2.01986e-06	-5.03594e-06	-9.33318e-07	-6.10521e-07
			DE: treatment of waste, from silicon wafer production, underground deposit ecoinvent 3.5				-4.54114e-07	-3.47719e-07	-5.81996e-07	-3.64167e-07	-8.87715e-08	-3.93325e-07	-4.16487e-07	-1.47001e-06	-3.03516e-07	-5.23642e-08	-2.19572e-06	-3.52336e-07	-2.04282e-07	-4.2089e-06	-6.4066e-07	-6.06884e-07	-2.40416e-07	-4.25825e-07	-7.88124e-07
			EU-25: Copper wire; technology mix; market mix, at plant; cross section 1 mm ECI/ELCD				0.000309122	0.000306688	0.000297392	0.000254463	0.000210987	2.58865e-05	1.35411e-06	1.10169e-05	0.000115397	7.49429e-05	0	3.20328e-05	3.07573e-05	0.00915456	0.000336712	0.000339908	0.000334632	0.000376377	0.000390216
			EU-28: Compressed air ts				5.22578e-06	5.18705e-06	1.50084e-06	5.51519e-06	1.37417e-06	4.4813e-08	2.72728e-08	4.37659e-08	1.12735e-07	1.96371e-06	7.49943e-06	8.5038e-08	1.67432e-06	1.46451e-06	2.94575e-06	2.96923e-06	3.65216e-06	2.04216e-06	1.09144e-06
			GLO: market for electronics scrap ecoinvent 3.5				-8.60238e-07	-8.57843e-07	-1.02924e-06	-7.97384e-07	-8.27077e-08	-5.94116e-07	-2.04098e-07	-5.73084e-07	-6.06923e-07	-1.30333e-07	-1.03717e-06	-1.19268e-06	-1.38341e-07	-4.79373e-07	-2.82247e-06	-2.81727e-06	-8.63695e-07	-1.07793e-06	-1.09082e-05
			GLO: market for packaging film, low density polyethylene ecoinvent 3.5				0.000198294	0.000192977	0.000143177	0.000348765	7.76743e-05	0.000115169	4.77236e-05	0.000130107	5.59382e-05	4.32321e-05	0.000135386	9.87618e-05	5.48127e-05	1.8231e-05	0.000238883	0.000223546	4.47834e-05	0.000166259	0.000157386
			GLO: market for solar glass, low-iron ecoinvent 3.5				0.0615357	0.0611864	0.0930101	0.0450131	0.0111733	0.0284885	0.0172591	0.0200384	0.0348893	0.00745182	0.0299287	0.0288986	0.017529	0.0221367	0.126989	0.127616	0.0288194	0.114677	0.125861
			RER: market for ethylene vinyl acetate copolymer ecoinvent 3.5				1.66465e-05	1.65719e-05	1.04144e-05	3.36587e-05	8.09916e-06	1.11016e-05	6.68472e-06	8.7395e-06	1.16334e-05	5.47755e-06	5.21284e-06	9.55981e-06	4.53373e-06	6.04808e-06	1.63888e-05	1.54533e-05	6.24036e-06	1.16788e-05	2.02156e-05
			RER: market for silicone product ecoinvent 3.5				5.61657e-06	5.69144e-06	5.20969e-06	6.28046e-06	6.54111e-06	5.30735e-06	3.71579e-06	3.78807e-06	4.72354e-06	3.14426e-06	5.00878e-06	4.42077e-06	4.44765e-06	1.91018e-06	6.32165e-06	6.21189e-06	1.12365e-05	5.39371e-06	6.22465e-06
			RoW: treatment of electronics scrap, metals recovery in copper smelter ecoinvent 3.5				3.40397e-05	3.39853e-05	1.35379e-05	1.25287e-05	1.96915e-06	0.00019134	3.7621e-06	1.92253e-05	5.49854e-06	5.31152e-06	8.41272e-06	0.000143955	2.20695e-06	3.45887e-06	1.97163e-05	1.96057e-05	1.05463e-05	1.45087e-05	4.38908e-05
		DE: C.02 - module packaging (007) <Mfg>					0.00376919	-0.00223502	0.00378236	0.00378815	0.000955134	0.00581325	0.00334796	0.0035239	0.00427003	0.00201779	0.136968	0.00518142	0.0135935	0.00224435	0.00651995	0.00638912	0.00839332	0.0035421	0.0125516
			GLO: market for EUR-flat pallet ecoinvent 3.5				0.000945807	-0.00500312	0.00141151	0.00110781	0.000253559	0.0010511	0.000626312	0.00160399	0.00108165	0.00034723	0.105468	0.00105027	0.000361838	0.0010154	0.00229102	0.00218209	0.00106298	0.00102607	0.00442046
			RER: market for corrugated board box ecoinvent 3.5				0.00282338	0.0027681	0.00237084	0.00268034	0.000701575	0.00476215	0.00272164	0.00191991	0.00318838	0.00167056	0.0314998	0.00413116	0.0132316	0.00122896	0.00422894	0.00420703	0.00733034	0.00251603	0.00813111
